# Supplementary material
Source: publisher site journal article supplement (https://www.dovepress.com/get_supplementary_file.php?f=178151-Table-S3.xlsx)
Supplement: Supplementary file 1 [file get_supplementary_file.php]

## Sheet: Final_results
Table S3 Boinformatics website software predicted target genes of miR-593-5p
Gene	TargetScan	microRNA.org	miRDB	Frequency
ABCA1	yes	yes	yes	3
ABHD15	yes	yes	yes	3
ADCY6	yes	yes	yes	3
ADRBK1	yes	yes	yes	3
ADSS	yes	yes	yes	3
AGAP3	yes	yes	yes	3
AGPAT5	yes	yes	yes	3
AGPS	yes	yes	yes	3
AMD1	yes	yes	yes	3
ANKRD44	yes	yes	yes	3
APCDD1L	yes	yes	yes	3
ARHGAP19	yes	yes	yes	3
B3GALT1	yes	yes	yes	3
C11orf63	yes	yes	yes	3
C12orf60	yes	yes	yes	3
C14orf28	yes	yes	yes	3
C16orf87	yes	yes	yes	3
C2orf44	yes	yes	yes	3
CAMKK2	yes	yes	yes	3
CAV1	yes	yes	yes	3
CCND2	yes	yes	yes	3
CD28	yes	yes	yes	3
CNGB3	yes	yes	yes	3
COMMD7	yes	yes	yes	3
CPNE3	yes	yes	yes	3
CSMD1	yes	yes	yes	3
CTDSP1	yes	yes	yes	3
CTDSPL2	yes	yes	yes	3
DAZAP2	yes	yes	yes	3
DCUN1D2	yes	yes	yes	3
DDX52	yes	yes	yes	3
DLX5	yes	yes	yes	3
DOPEY1	yes	yes	yes	3
DPP8	yes	yes	yes	3
DZIP1	yes	yes	yes	3
EDNRA	yes	yes	yes	3
EGR1	yes	yes	yes	3
ELMO2	yes	yes	yes	3
ELP4	yes	yes	yes	3
EXOSC2	yes	yes	yes	3
FAF2	yes	yes	yes	3
FAM46C	yes	yes	yes	3
FBXO41	yes	yes	yes	3
FEM1C	yes	yes	yes	3
FGFR1OP	yes	yes	yes	3
FLOT2	yes	yes	yes	3
FUT8	yes	yes	yes	3
FYTTD1	yes	yes	yes	3
G3BP2	yes	yes	yes	3
GAB2	yes	yes	yes	3
GNAI3	yes	yes	yes	3
GPN2	yes	yes	yes	3
GRM5	yes	yes	yes	3
GTDC1	yes	yes	yes	3
HDAC7	yes	yes	yes	3
HELZ	yes	yes	yes	3
HNRNPA2B1	yes	yes	yes	3
HPS4	yes	yes	yes	3
HRNR	yes	yes	yes	3
HS3ST5	yes	yes	yes	3
HSDL1	yes	yes	yes	3
IDH2	yes	yes	yes	3
IL16	yes	yes	yes	3
INPP5A	yes	yes	yes	3
KDELR3	yes	yes	yes	3
KIAA0101	yes	yes	yes	3
KIAA1143	yes	yes	yes	3
KIF3B	yes	yes	yes	3
KLHL24	yes	yes	yes	3
KRT80	yes	yes	yes	3
LIMD1	yes	yes	yes	3
LMOD3	yes	yes	yes	3
LNX2	yes	yes	yes	3
LPAR6	yes	yes	yes	3
LRCH2	yes	yes	yes	3
LUC7L2	yes	yes	yes	3
MMD2	yes	yes	yes	3
MPP5	yes	yes	yes	3
MRPL11	yes	yes	yes	3
MSN	yes	yes	yes	3
MST4	yes	yes	yes	3
MYO1B	yes	yes	yes	3
MYO1D	yes	yes	yes	3
MYO5B	yes	yes	yes	3
NALCN	yes	yes	yes	3
NAP1L4	yes	yes	yes	3
NCDN	yes	yes	yes	3
NDNL2	yes	yes	yes	3
NEUROD4	yes	yes	yes	3
NFYB	yes	yes	yes	3
NIP7	yes	yes	yes	3
NOD1	yes	yes	yes	3
NOL9	yes	yes	yes	3
NR3C1	yes	yes	yes	3
NRG1	yes	yes	yes	3
OGN	yes	yes	yes	3
OPCML	yes	yes	yes	3
OR7A5	yes	yes	yes	3
OSBPL11	yes	yes	yes	3
OVOL1	yes	yes	yes	3
OVOL2	yes	yes	yes	3
PAFAH1B1	yes	yes	yes	3
PAM	yes	yes	yes	3
PDCD7	yes	yes	yes	3
PDE6C	yes	yes	yes	3
PDIA6	yes	yes	yes	3
PHF10	yes	yes	yes	3
PHKG2	yes	yes	yes	3
PI15	yes	yes	yes	3
PIK3C2A	yes	yes	yes	3
PMF1	yes	yes	yes	3
PMP22	yes	yes	yes	3
PMPCB	yes	yes	yes	3
PNRC2	yes	yes	yes	3
PPM1A	yes	yes	yes	3
PPM1D	yes	yes	yes	3
PRUNE2	yes	yes	yes	3
PSKH1	yes	yes	yes	3
PTPDC1	yes	yes	yes	3
PWWP2A	yes	yes	yes	3
RAB11FIP2	yes	yes	yes	3
RAD1	yes	yes	yes	3
RGMA	yes	yes	yes	3
RIMKLB	yes	yes	yes	3
RIMS4	yes	yes	yes	3
RIPK4	yes	yes	yes	3
RNF165	yes	yes	yes	3
RNF213	yes	yes	yes	3
RNMT	yes	yes	yes	3
ROBO2	yes	yes	yes	3
RPP14	yes	yes	yes	3
RRAGD	yes	yes	yes	3
RUFY2	yes	yes	yes	3
SERTAD4	yes	yes	yes	3
SH2B3	yes	yes	yes	3
SIKE1	yes	yes	yes	3
SIRPA	yes	yes	yes	3
SLC35C1	yes	yes	yes	3
SMAD3	yes	yes	yes	3
SNX1	yes	yes	yes	3
SOCS5	yes	yes	yes	3
SP1	yes	yes	yes	3
SPOCK3	yes	yes	yes	3
SPSB1	yes	yes	yes	3
TET3	yes	yes	yes	3
TM7SF3	yes	yes	yes	3
TMEM194A	yes	yes	yes	3
TOR3A	yes	yes	yes	3
TRAF4	yes	yes	yes	3
TRIM44	yes	yes	yes	3
TRPM3	yes	yes	yes	3
TSEN15	yes	yes	yes	3
TTC26	yes	yes	yes	3
TTC7A	yes	yes	yes	3
TWSG1	yes	yes	yes	3
UBE2D4	yes	yes	yes	3
UVRAG	yes	yes	yes	3
VAPA	yes	yes	yes	3
WIPF1	yes	yes	yes	3
YOD1	yes	yes	yes	3
ZBTB5	yes	yes	yes	3
ZFPM2	yes	yes	yes	3
ZNF551	yes	yes	yes	3

## Sheet: TargetScan
Ortholog of target gene	Representative transcript	Gene name	3P-seq tags + 5	Total sites	8mer sites	7mer-m8 sites	7mer-A1 sites	6mer sites	Representative miRNA	Cumulative weighted context++ score	Total context++ score	Aggregate PCT
PRX	ENST00000291825.7	periaxin	17	5	0	2	3	7	hsa-miR-593-5p	-1.09	-1.09	N/A
C1orf220	ENST00000319387.2	chromosome 1 open reading frame 220	5	3	1	2	0	0	hsa-miR-593-5p	-1.03	-1.03	N/A
PSKH1	ENST00000291041.5	protein serine kinase H1	699	4	1	2	1	1	hsa-miR-593-5p	-0.97	-0.98	N/A
SPSB1	ENST00000328089.6	splA/ryanodine receptor domain and SOCS box containing 1	572	3	2	1	0	3	hsa-miR-593-5p	-0.92	-0.94	N/A
CD99L2	ENST00000370377.3	CD99 molecule-like 2	303	3	2	1	0	0	hsa-miR-593-5p	-0.85	-0.86	N/A
ARMC7	ENST00000245543.1	armadillo repeat containing 7	64	4	0	3	1	0	hsa-miR-593-5p	-0.83	-0.83	N/A
ENO3	ENST00000323997.6	enolase 3 (beta, muscle)	109	1	1	0	0	0	hsa-miR-593-5p	-0.82	-0.82	N/A
UBE2D4	ENST00000222402.3	ubiquitin-conjugating enzyme E2D 4 (putative)	20	2	1	1	0	1	hsa-miR-593-5p	-0.82	-0.96	N/A
PHF10	ENST00000366780.4	PHD finger protein 10	100	1	1	0	0	0	hsa-miR-593-5p	-0.8	-0.8	N/A
TET3	ENST00000409262.3	tet methylcytosine dioxygenase 3	1437	1	1	0	0	3	hsa-miR-593-5p	-0.77	-0.77	N/A
DAZAP2	ENST00000412716.3	DAZ associated protein 2	4265	2	1	1	0	1	hsa-miR-593-5p	-0.75	-0.81	N/A
PI15	ENST00000260113.2	peptidase inhibitor 15	12	2	1	1	0	0	hsa-miR-593-5p	-0.75	-0.75	N/A
RHOXF1	ENST00000217999.2	Rhox homeobox family, member 1	7	1	1	0	0	0	hsa-miR-593-5p	-0.74	-0.74	N/A
OVOL1	ENST00000335987.3	ovo-like 1(Drosophila)	5	2	1	0	1	0	hsa-miR-593-5p	-0.74	-0.74	N/A
PDCD7	ENST00000204549.4	programmed cell death 7	64	1	1	0	0	1	hsa-miR-593-5p	-0.73	-0.73	N/A
CAV1	ENST00000405348.1	caveolin 1, caveolae protein, 22kDa	415	1	1	0	0	0	hsa-miR-593-5p	-0.72	-0.72	N/A
ALPK3	ENST00000258888.5	alpha-kinase 3	16	3	2	1	0	0	hsa-miR-593-5p	-0.71	-0.71	N/A
LPAR6	ENST00000378434.4	lysophosphatidic acid receptor 6	5	1	1	0	0	0	hsa-miR-593-5p	-0.71	-0.71	N/A
ANKRD40	ENST00000285243.6	ankyrin repeat domain 40	409	2	2	0	0	0	hsa-miR-593-5p	-0.71	-0.71	N/A
NCDN	ENST00000356090.4	neurochondrin	654	4	1	3	0	0	hsa-miR-593-5p	-0.71	-0.71	N/A
CTD-2368P22.1	ENST00000550135.1	HCG1811579; Uncharacterized protein	25	4	3	0	1	1	hsa-miR-593-5p	-0.7	-0.7	N/A
DNAJB12	ENST00000338820.3	DnaJ (Hsp40) homolog, subfamily B, member 12	1458	4	0	2	2	2	hsa-miR-593-5p	-0.7	-0.75	N/A
MBD3	ENST00000590550.2	methyl-CpG binding domain protein 3	393	6	1	3	2	6	hsa-miR-593-5p	-0.69	-1.02	N/A
CLLU1OS	ENST00000378487.2	chronic lymphocytic leukemia up-regulated 1 opposite strand	5	1	1	0	0	0	hsa-miR-593-5p	-0.69	-0.69	N/A
HS3ST5	ENST00000312719.5	heparan sulfate (glucosamine) 3-O-sulfotransferase 5	22	2	1	1	0	0	hsa-miR-593-5p	-0.69	-0.89	N/A
AC073610.5	ENST00000537495.1	Uncharacterized protein	11	1	1	0	0	0	hsa-miR-593-5p	-0.69	-0.69	N/A
CEP170B	ENST00000414716.3	centrosomal protein 170B	326	4	3	1	0	2	hsa-miR-593-5p	-0.68	-0.68	N/A
RP11-180C1.1	ENST00000515720.1	Uncharacterized protein	5	2	0	2	0	0	hsa-miR-593-5p	-0.68	-0.68	N/A
TRIM44	ENST00000299413.5	tripartite motif containing 44	4203	5	3	1	1	0	hsa-miR-593-5p	-0.68	-1.54	N/A
UBL4A	ENST00000369660.4	ubiquitin-like 4A	3118	2	1	0	1	1	hsa-miR-593-5p	-0.67	-0.67	N/A
C11orf63	ENST00000531316.1	chromosome 11 open reading frame 63	38	1	1	0	0	0	hsa-miR-593-5p	-0.67	-0.67	N/A
XXbac-BPG32J3.20	ENST00000461287.1		1251	3	0	2	1	0	hsa-miR-593-5p	-0.67	-0.67	N/A
C10orf105	ENST00000441508.2	chromosome 10 open reading frame 105	5	4	1	1	2	1	hsa-miR-593-5p	-0.67	-0.67	N/A
IDH2	ENST00000330062.3	isocitrate dehydrogenase 2 (NADP+), mitochondrial	296	1	1	0	0	0	hsa-miR-593-5p	-0.66	-0.69	N/A
AWAT2	ENST00000276101.3	acyl-CoA wax alcohol acyltransferase 2	5	2	1	0	1	2	hsa-miR-593-5p	-0.66	-0.66	N/A
ITGB2	ENST00000397852.1	integrin, beta 2 (complement component 3 receptor 3 and 4 subunit)	10	1	1	0	0	0	hsa-miR-593-5p	-0.66	-0.66	N/A
OGN	ENST00000262551.4	osteoglycin	5	2	2	0	0	0	hsa-miR-593-5p	-0.65	-0.65	N/A
GRIK1-AS2	ENST00000333765.4	GRIK1 antisense RNA 2	5	1	1	0	0	0	hsa-miR-593-5p	-0.65	-0.65	N/A
FLJ20306	ENST00000601673.1	CDNA FLJ20306 fis, clone HEP06881; Putative uncharacterized protein FLJ20306; Uncharacterized protein	5	1	1	0	0	1	hsa-miR-593-5p	-0.65	-0.65	N/A
GNAI3	ENST00000369851.4	guanine nucleotide binding protein (G protein), alpha inhibiting activity polypeptide 3	2439	2	1	1	0	1	hsa-miR-593-5p	-0.65	-0.72	N/A
COMMD5	ENST00000402718.3	COMM domain containing 5	927	1	1	0	0	0	hsa-miR-593-5p	-0.65	-0.65	N/A
RPS6KA6	ENST00000262752.2	ribosomal protein S6 kinase, 90kDa, polypeptide 6	156	2	2	0	0	0	hsa-miR-593-5p	-0.65	-0.67	N/A
SNX1	ENST00000353874.4	sorting nexin 1	1296	2	1	0	1	2	hsa-miR-593-5p	-0.64	-0.71	N/A
STAC2	ENST00000333461.5	SH3 and cysteine rich domain 2	123	2	0	0	2	1	hsa-miR-593-5p	-0.64	-0.65	N/A
PNRC2	ENST00000334351.7	proline-rich nuclear receptor coactivator 2	100	1	1	0	0	0	hsa-miR-593-5p	-0.64	-0.64	N/A
TMEM119	ENST00000392806.3	transmembrane protein 119	5	1	1	0	0	3	hsa-miR-593-5p	-0.64	-0.64	N/A
LDLRAD2	ENST00000344642.2	low density lipoprotein receptor class A domain containing 2	5	5*	1	0	3	3	hsa-miR-593-5p	-0.63	-0.63	N/A
PPP1R14B	ENST00000392210.2	protein phosphatase 1, regulatory (inhibitor) subunit 14B	114	1	1	0	0	0	hsa-miR-593-5p	-0.62	-0.62	N/A
C12orf60	ENST00000330828.2	chromosome 12 open reading frame 60	11	1	1	0	0	0	hsa-miR-593-5p	-0.62	-0.62	N/A
EPS8L2	ENST00000318562.8	EPS8-like 2	1419	3	1	1	1	0	hsa-miR-593-5p	-0.62	-0.65	N/A
NCR3LG1	ENST00000338965.4	natural killer cell cytotoxicity receptor 3 ligand 1	214	4	4	0	0	0	hsa-miR-593-5p	-0.62	-0.62	N/A
ARFGAP2	ENST00000426335.2	ADP-ribosylation factor GTPase activating protein 2	3549	2	1	0	1	0	hsa-miR-593-5p	-0.61	-0.61	N/A
PCDHGB2	ENST00000522605.1	protocadherin gamma subfamily B, 2	145	2	1	0	1	1	hsa-miR-593-5p	-0.61	-0.61	N/A
STX17	ENST00000259400.6	syntaxin 17	510	1	1	0	0	0	hsa-miR-593-5p	-0.61	-0.61	N/A
PCDHGB1	ENST00000523390.1	protocadherin gamma subfamily B, 1	145	2	1	0	1	1	hsa-miR-593-5p	-0.61	-0.61	N/A
KRT74	ENST00000549343.1	keratin 74	5	1	1	0	0	0	hsa-miR-593-5p	-0.61	-0.61	N/A
SH2B3	ENST00000341259.2	SH2B adaptor protein 3	89	5	2	2	1	0	hsa-miR-593-5p	-0.6	-0.69	N/A
SRSF10	ENST00000343255.5	serine/arginine-rich splicing factor 10	1920	2	2	0	0	0	hsa-miR-593-5p	-0.6	-0.64	N/A
C1ORF220	ENST00000367636.4		5	3	1	2	0	0	hsa-miR-593-5p	-0.6	-1	N/A
KIAA0101	ENST00000558008.1	KIAA0101	6821	1	1	0	0	1	hsa-miR-593-5p	-0.6	-0.73	N/A
ADSS	ENST00000366535.3	adenylosuccinate synthase	2881	2	1	0	1	0	hsa-miR-593-5p	-0.6	-0.88	N/A
CDC42SE2	ENST00000360515.3	CDC42 small effector 2	1057	2	1	0	1	0	hsa-miR-593-5p	-0.6	-0.73	N/A
ELMO2	ENST00000290246.6	engulfment and cell motility 2	22	2	1	1	0	0	hsa-miR-593-5p	-0.59	-0.59	N/A
COMMD7	ENST00000278980.6	COMM domain containing 7	445	1	1	0	0	0	hsa-miR-593-5p	-0.59	-0.59	N/A
MSN	ENST00000360270.5	moesin	5947	2	1	1	0	0	hsa-miR-593-5p	-0.59	-0.59	N/A
DCUN1D2	ENST00000332592.3	DCN1, defective in cullin neddylation 1, domain containing 2	17	1	1	0	0	0	hsa-miR-593-5p	-0.59	-0.59	N/A
ZNF488	ENST00000494156.1	zinc finger protein 488	61	3	0	3	0	2	hsa-miR-593-5p	-0.58	-0.61	N/A
HEATR1	ENST00000366582.3	HEAT repeat containing 1	282	2	0	1	1	0	hsa-miR-593-5p	-0.58	-0.58	N/A
MTRNR2L5	ENST00000512524.2	MT-RNR2-like 5	5	1	1	0	0	0	hsa-miR-593-5p	-0.58	-0.58	N/A
GTDC1	ENST00000392869.2	glycosyltransferase-like domain containing 1	241	2	1	1	0	2	hsa-miR-593-5p	-0.58	-0.6	N/A
AC005481.5	ENST00000409610.1	Uncharacterized protein	5	2	1	1	0	0	hsa-miR-593-5p	-0.57	-0.57	N/A
AC016586.1	ENST00000535853.1		5	1	1	0	0	0	hsa-miR-593-5p	-0.57	-0.57	N/A
NDNL2	ENST00000332303.4	necdin-like 2	759	1	1	0	0	0	hsa-miR-593-5p	-0.57	-0.57	N/A
IST1	ENST00000329908.8	increased sodium tolerance 1 homolog (yeast)	305	2	0	1	1	1	hsa-miR-593-5p	-0.57	-0.67	N/A
BET1L	ENST00000325147.9	Bet1 golgi vesicular membrane trafficking protein-like	702	4	0	2	2	0	hsa-miR-593-5p	-0.57	-0.59	N/A
MYO1D	ENST00000318217.5	myosin ID	16	4	1	3	0	1	hsa-miR-593-5p	-0.56	-0.56	N/A
RHOG	ENST00000351018.4	ras homolog family member G	58	2	0	2	0	0	hsa-miR-593-5p	-0.56	-0.56	N/A
DPP8	ENST00000341861.5	dipeptidyl-peptidase 8	1293	2	2	0	0	0	hsa-miR-593-5p	-0.56	-0.58	N/A
PDE6C	ENST00000371447.3	phosphodiesterase 6C, cGMP-specific, cone, alpha prime	5	1	1	0	0	0	hsa-miR-593-5p	-0.56	-0.56	N/A
RUFY2	ENST00000388768.2	RUN and FYVE domain containing 2	15	2	1	1	0	0	hsa-miR-593-5p	-0.56	-0.56	N/A
MFAP3	ENST00000436816.1	microfibrillar-associated protein 3	1139	2	2	0	0	0	hsa-miR-593-5p	-0.56	-0.59	N/A
SRRM3	ENST00000388802.4	serine/arginine repetitive matrix 3	16	3	0	2	1	0	hsa-miR-593-5p	-0.56	-0.56	N/A
PLEK2	ENST00000216446.4	pleckstrin 2	44	1	1	0	0	0	hsa-miR-593-5p	-0.56	-0.56	N/A
TFRC	ENST00000540528.1	transferrin receptor	296	1	1	0	0	0	hsa-miR-593-5p	-0.56	-0.56	N/A
COQ10B	ENST00000263960.2	coenzyme Q10 homolog B (S. cerevisiae)	1070	1	1	0	0	0	hsa-miR-593-5p	-0.56	-0.56	N/A
RBM8A	ENST00000330165.8	RNA binding motif protein 8A	33	2	1	1	0	1	hsa-miR-593-5p	-0.55	-0.57	N/A
NCL	ENST00000322723.4	nucleolin	10100	1	1	0	0	0	hsa-miR-593-5p	-0.55	-0.56	N/A
LIAS	ENST00000261434.3	lipoic acid synthetase	66	1	1	0	0	1	hsa-miR-593-5p	-0.55	-0.55	N/A
NDST1	ENST00000261797.6	N-deacetylase/N-sulfotransferase (heparan glucosaminyl) 1	13660	1	1	0	0	2	hsa-miR-593-5p	-0.55	-0.55	N/A
YIPF1	ENST00000371399.1	Yip1 domain family, member 1	145	1	1	0	0	0	hsa-miR-593-5p	-0.55	-0.55	N/A
SLC35B2	ENST00000393810.1	solute carrier family 35 (adenosine 3'-phospho 5'-phosphosulfate transporter), member B2	3587	1	1	0	0	0	hsa-miR-593-5p	-0.54	-0.54	N/A
STK19	ENST00000375331.2	serine/threonine kinase 19	5	1	1	0	0	0	hsa-miR-593-5p	-0.54	-0.54	N/A
ACP5	ENST00000590420.1	acid phosphatase 5, tartrate resistant	244	1	1	0	0	0	hsa-miR-593-5p	-0.54	-0.55	N/A
NMNAT2	ENST00000294868.4	nicotinamide nucleotide adenylyltransferase 2	18	6	0	4	2	2	hsa-miR-593-5p	-0.54	-0.54	N/A
TMED8	ENST00000216468.7	transmembrane emp24 protein transport domain containing 8	53	3	1	1	1	0	hsa-miR-593-5p	-0.53	-0.59	N/A
KIAA1143	ENST00000296121.4	KIAA1143	5	1	1	0	0	1	hsa-miR-593-5p	-0.53	-0.53	N/A
YWHAH	ENST00000397492.1	tyrosine 3-monooxygenase/tryptophan 5-monooxygenase activation protein, eta polypeptide	7321	1	1	0	0	0	hsa-miR-593-5p	-0.52	-0.52	N/A
COLEC11	ENST00000236693.7	collectin sub-family member 11	41	1	1	0	0	0	hsa-miR-593-5p	-0.52	-0.52	N/A
MAFG	ENST00000357736.4	v-maf avian musculoaponeurotic fibrosarcoma oncogene homolog G	5	2	0	1	1	3	hsa-miR-593-5p	-0.52	-0.52	N/A
PRRG3	ENST00000370353.3	proline rich Gla (G-carboxyglutamic acid) 3 (transmembrane)	5	3	0	1	2	1	hsa-miR-593-5p	-0.52	-0.52	N/A
A4GALT	ENST00000401850.1	alpha 1,4-galactosyltransferase	21	1	1	0	0	1	hsa-miR-593-5p	-0.52	-0.52	N/A
RPL22	ENST00000234875.4	ribosomal protein L22	1455	2	0	2	0	1	hsa-miR-593-5p	-0.52	-0.53	N/A
ZFPM2	ENST00000407775.2	zinc finger protein, FOG family member 2	595	1	1	0	0	0	hsa-miR-593-5p	-0.52	-0.52	N/A
CELSR3	ENST00000164024.4	cadherin, EGF LAG seven-pass G-type receptor 3	13	2	1	0	1	1	hsa-miR-593-5p	-0.52	-0.52	N/A
ARL4D	ENST00000320033.4	ADP-ribosylation factor-like 4D	3401	1	1	0	0	0	hsa-miR-593-5p	-0.52	-0.52	N/A
TMEM86A	ENST00000280734.2	transmembrane protein 86A	5	2	2	0	0	1	hsa-miR-593-5p	-0.51	-0.51	N/A
MGME1	ENST00000377710.5	mitochondrial genome maintenance exonuclease 1	41	2	0	0	2	0	hsa-miR-593-5p	-0.51	-0.51	N/A
APBB3	ENST00000358580.5	amyloid beta (A4) precursor protein-binding, family B, member 3	9	1	1	0	0	1	hsa-miR-593-5p	-0.51	-0.51	N/A
PLA2G5	ENST00000375108.3	phospholipase A2, group V	5	2	1	1	0	0	hsa-miR-593-5p	-0.51	-0.69	N/A
SIAH3	ENST00000400405.2	siah E3 ubiquitin protein ligase family member 3	5	2	1	0	1	0	hsa-miR-593-5p	-0.51	-0.51	N/A
FKBP9	ENST00000242209.4	FK506 binding protein 9, 63 kDa	43	3	2	0	1	0	hsa-miR-593-5p	-0.51	-0.62	N/A
RNFT1	ENST00000442346.2	ring finger protein, transmembrane 1	6	1	0	1	0	0	hsa-miR-593-5p	-0.51	-0.51	N/A
ST6GALNAC4	ENST00000335791.5	ST6 (alpha-N-acetyl-neuraminyl-2,3-beta-galactosyl-1,3)-N-acetylgalactosaminide alpha-2,6-sialyltransferase 4	178	1	1	0	0	0	hsa-miR-593-5p	-0.51	-0.51	N/A
NPAS3	ENST00000346562.2	neuronal PAS domain protein 3	9	2	1	0	1	0	hsa-miR-593-5p	-0.5	-0.5	N/A
C1orf204	ENST00000368102.1	chromosome 1 open reading frame 204	5	1	1	0	0	1	hsa-miR-593-5p	-0.5	-0.5	N/A
ZNF22	ENST00000298299.3	zinc finger protein 22	62	1	1	0	0	0	hsa-miR-593-5p	-0.5	-0.5	N/A
SLC37A2	ENST00000298280.5	solute carrier family 37 (glucose-6-phosphate transporter), member 2	18	2	1	0	1	1	hsa-miR-593-5p	-0.5	-0.51	N/A
FAM64A	ENST00000570337.2	family with sequence similarity 64, member A	392	1	1	0	0	1	hsa-miR-593-5p	-0.5	-0.51	N/A
INPP5A	ENST00000368594.3	inositol polyphosphate-5-phosphatase, 40kDa	243	1	1	0	0	0	hsa-miR-593-5p	-0.5	-0.5	N/A
MAP3K8	ENST00000375321.1	mitogen-activated protein kinase kinase kinase 8	22	1	1	0	0	0	hsa-miR-593-5p	-0.5	-0.5	N/A
RGPD1	ENST00000559485.1	RANBP2-like and GRIP domain containing 1	5	1	1	0	0	1	hsa-miR-593-5p	-0.5	-0.5	N/A
DECR2	ENST00000219481.5	2,4-dienoyl CoA reductase 2, peroxisomal	1049	2	0	0	2	1	hsa-miR-593-5p	-0.49	-0.49	N/A
RGPD2	ENST00000398146.3	RANBP2-like and GRIP domain containing 2	5	1	1	0	0	1	hsa-miR-593-5p	-0.49	-0.49	N/A
C19orf12	ENST00000592153.1	chromosome 19 open reading frame 12	242	1	1	0	0	1	hsa-miR-593-5p	-0.49	-0.59	N/A
OPCML	ENST00000331898.7	opioid binding protein/cell adhesion molecule-like	5	4	0	2	2	0	hsa-miR-593-5p	-0.49	-0.49	N/A
ADCY6	ENST00000357869.3	adenylate cyclase 6	6	3	1	1	1	0	hsa-miR-593-5p	-0.49	-0.49	N/A
ZNF598	ENST00000563630.1	zinc finger protein 598	22	2	1	0	1	0	hsa-miR-593-5p	-0.49	-0.49	N/A
CTDSP1	ENST00000273062.2	CTD (carboxy-terminal domain, RNA polymerase II, polypeptide A) small phosphatase 1	1299	1	1	0	0	1	hsa-miR-593-5p	-0.49	-0.49	N/A
TMEM187	ENST00000369982.4	transmembrane protein 187	528	1	1	0	0	0	hsa-miR-593-5p	-0.49	-0.49	N/A
RP11-113D6.10	ENST00000527059.1	Putative mitochondrial carrier protein LOC494141	5	2	0	1	1	0	hsa-miR-593-5p	-0.49	-0.49	N/A
HSFY1	ENST00000382856.2	heat shock transcription factor, Y-linked 1	5	1	1	0	0	0	hsa-miR-593-5p	-0.49	-0.49	N/A
OTOP2	ENST00000580223.1	otopetrin 2	5	1	1	0	0	1	hsa-miR-593-5p	-0.49	-0.49	N/A
EIF4EBP2	ENST00000373218.4	eukaryotic translation initiation factor 4E binding protein 2	690	3	0	2	1	0	hsa-miR-593-5p	-0.49	-0.6	N/A
KIF13A	ENST00000378814.5	kinesin family member 13A	725	1	1	0	0	0	hsa-miR-593-5p	-0.49	-0.53	N/A
RP11-520P18.5	ENST00000562505.1	Uncharacterized protein	5	1	0	0	1	3	hsa-miR-593-5p	-0.49	-0.49	N/A
HSFY2	ENST00000382852.1	heat shock transcription factor, Y linked 2	5	1	1	0	0	0	hsa-miR-593-5p	-0.49	-0.49	N/A
AC007375.1	ENST00000600936.1	Uncharacterized protein; cDNA FLJ43210 fis, clone FEBRA2020582	7	1	1	0	0	0	hsa-miR-593-5p	-0.48	-0.48	N/A
PWWP2A	ENST00000456329.3	PWWP domain containing 2A	272	2	0	1	1	1	hsa-miR-593-5p	-0.48	-0.49	N/A
AC132186.1	ENST00000544589.1	CDNA FLJ27243 fis, clone SYN08134; Uncharacterized protein	5	1	1	0	0	0	hsa-miR-593-5p	-0.48	-0.48	N/A
BIRC5	ENST00000301633.4	baculoviral IAP repeat containing 5	3607	1	1	0	0	1	hsa-miR-593-5p	-0.48	-0.48	N/A
TET1	ENST00000373644.4	tet methylcytosine dioxygenase 1	5	1	1	0	0	0	hsa-miR-593-5p	-0.48	-0.48	N/A
PBX1	ENST00000420696.2	pre-B-cell leukemia homeobox 1	18	2	0	1	1	0	hsa-miR-593-5p	-0.48	-0.48	N/A
HN1L	ENST00000248098.3	hematological and neurological expressed 1-like	1302	2	0	1	1	0	hsa-miR-593-5p	-0.48	-0.51	N/A
EDAR	ENST00000409271.1	ectodysplasin A receptor	7	2	1	1	0	0	hsa-miR-593-5p	-0.48	-0.48	N/A
ZNF551	ENST00000282296.5	zinc finger protein 551	49	3	2	0	1	0	hsa-miR-593-5p	-0.48	-0.48	N/A
CNEP1R1	ENST00000458059.3	CTD nuclear envelope phosphatase 1 regulatory subunit 1	546	1	1	0	0	1	hsa-miR-593-5p	-0.47	-0.47	N/A
LAS1L	ENST00000312391.8	LAS1-like (S. cerevisiae)	26	1	1	0	0	0	hsa-miR-593-5p	-0.47	-0.47	N/A
RIMS4	ENST00000372851.3	regulating synaptic membrane exocytosis 4	30	3	2	1	0	2	hsa-miR-593-5p	-0.47	-0.47	N/A
FAF2	ENST00000261942.6	Fas associated factor family member 2	1700	3	1	1	1	0	hsa-miR-593-5p	-0.47	-0.6	N/A
SLC10A7	ENST00000264986.3	solute carrier family 10, member 7	77	1	1	0	0	0	hsa-miR-593-5p	-0.47	-0.47	N/A
SDR42E1	ENST00000328945.5	short chain dehydrogenase/reductase family 42E, member 1	164	1	1	0	0	0	hsa-miR-593-5p	-0.47	-0.49	N/A
MARCKS	ENST00000368635.4	myristoylated alanine-rich protein kinase C substrate	188	1	1	0	0	0	hsa-miR-593-5p	-0.47	-0.47	N/A
RSPO1	ENST00000373059.1	R-spondin 1	5	1	1	0	0	0	hsa-miR-593-5p	-0.47	-0.47	N/A
UNC5B	ENST00000335350.6	unc-5 homolog B (C. elegans)	90	3	0	1	2	1	hsa-miR-593-5p	-0.47	-0.47	N/A
DUSP18	ENST00000403268.1	dual specificity phosphatase 18	491	2	1	1	0	1	hsa-miR-593-5p	-0.47	-0.52	N/A
COL11A1	ENST00000370096.3	collagen, type XI, alpha 1	160	1	1	0	0	0	hsa-miR-593-5p	-0.47	-0.47	N/A
SERINC2	ENST00000373709.3	serine incorporator 2	624	2	0	2	0	0	hsa-miR-593-5p	-0.47	-0.47	N/A
VASH1	ENST00000167106.4	vasohibin 1	39	4	0	2	2	0	hsa-miR-593-5p	-0.47	-0.47	N/A
ZBTB44	ENST00000525842.1	zinc finger and BTB domain containing 44	236	4	1	3	0	0	hsa-miR-593-5p	-0.47	-0.63	N/A
C10orf85	ENST00000369071.2	chromosome 10 open reading frame 85	5	1	1	0	0	0	hsa-miR-593-5p	-0.47	-0.47	N/A
ANKRD66	ENST00000565422.1	ankyrin repeat domain 66	5	1	1	0	0	0	hsa-miR-593-5p	-0.46	-0.46	N/A
CEMP1	ENST00000382350.1	cementum protein 1	5	1	1	0	0	0	hsa-miR-593-5p	-0.46	-0.46	N/A
MMD2	ENST00000406755.1	monocyte to macrophage differentiation-associated 2	5	1	1	0	0	0	hsa-miR-593-5p	-0.46	-0.46	N/A
LIMD1	ENST00000273317.4	LIM domains containing 1	1092	2	2	0	0	2	hsa-miR-593-5p	-0.46	-0.5	N/A
NKAIN3	ENST00000523211.1	Na+/K+ transporting ATPase interacting 3	5	2	0	2	0	0	hsa-miR-593-5p	-0.46	-0.46	N/A
ALG12	ENST00000330817.6	ALG12, alpha-1,6-mannosyltransferase	356	3	1	1	1	3	hsa-miR-593-5p	-0.46	-0.69	N/A
DLX3	ENST00000434704.2	distal-less homeobox 3	5	1	1	0	0	1	hsa-miR-593-5p	-0.46	-0.46	N/A
ATP4A	ENST00000262623.3	ATPase, H+/K+ exchanging, alpha polypeptide	5	1	1	0	0	0	hsa-miR-593-5p	-0.46	-0.46	N/A
ZNF460	ENST00000360338.3	zinc finger protein 460	164	2	1	0	1	1	hsa-miR-593-5p	-0.46	-0.48	N/A
C2orf44	ENST00000406895.3	chromosome 2 open reading frame 44	104	1	1	0	0	0	hsa-miR-593-5p	-0.46	-0.46	N/A
KCNK7	ENST00000394216.2	potassium channel, subfamily K, member 7	5	1	1	0	0	0	hsa-miR-593-5p	-0.46	-0.46	N/A
ZNF134	ENST00000396161.5	zinc finger protein 134	184	1	1	0	0	1	hsa-miR-593-5p	-0.46	-0.48	N/A
IDH3G	ENST00000370092.3	isocitrate dehydrogenase 3 (NAD+) gamma	391	1	1	0	0	0	hsa-miR-593-5p	-0.46	-0.46	N/A
LOXL2	ENST00000389131.3	lysyl oxidase-like 2	701	1	1	0	0	0	hsa-miR-593-5p	-0.46	-0.46	N/A
ANKRD36	ENST00000357042.4	ankyrin repeat domain 36	5	1	1	0	0	0	hsa-miR-593-5p	-0.45	-0.45	N/A
MPP5	ENST00000261681.4	membrane protein, palmitoylated 5 (MAGUK p55 subfamily member 5)	354	1	1	0	0	0	hsa-miR-593-5p	-0.45	-0.45	N/A
NCAPH	ENST00000240423.4	non-SMC condensin I complex, subunit H	217	5	1	2	2	0	hsa-miR-593-5p	-0.45	-0.85	N/A
C22orf24	ENST00000248984.3	chromosome 22 open reading frame 24	5	1	1	0	0	0	hsa-miR-593-5p	-0.45	-0.45	N/A
LSMEM2	ENST00000316436.3	leucine-rich single-pass membrane protein 2	7	1	1	0	0	0	hsa-miR-593-5p	-0.45	-0.45	N/A
TRIM11	ENST00000493030.2	tripartite motif containing 11	727	5	0	4	1	4	hsa-miR-593-5p	-0.45	-0.93	N/A
KIAA0895	ENST00000297063.6	KIAA0895	1104	2	0	1	1	0	hsa-miR-593-5p	-0.45	-0.45	N/A
ITPKA	ENST00000260386.5	inositol-trisphosphate 3-kinase A	119	2	0	0	2	0	hsa-miR-593-5p	-0.45	-0.45	N/A
C1orf106	ENST00000367342.4	chromosome 1 open reading frame 106	24	2	1	0	1	0	hsa-miR-593-5p	-0.45	-0.45	N/A
ASCL4	ENST00000342331.4	achaete-scute complex homolog 4 (Drosophila)	5	1	1	0	0	0	hsa-miR-593-5p	-0.45	-0.45	N/A
MLTK	ENST00000338983.3	Mitogen-activated protein kinase kinase kinase MLT	766	2	1	1	0	0	hsa-miR-593-5p	-0.45	-0.45	N/A
RGMA	ENST00000543599.1	RGM domain family, member A	145	2	1	1	0	1	hsa-miR-593-5p	-0.45	-0.45	N/A
DCLRE1C	ENST00000378289.4	DNA cross-link repair 1C	29	1	1	0	0	0	hsa-miR-593-5p	-0.45	-0.45	N/A
GLOD4	ENST00000301329.6	glyoxalase domain containing 4	2432	1	1	0	0	0	hsa-miR-593-5p	-0.45	-0.45	N/A
GLIS2	ENST00000262366.3	GLIS family zinc finger 2	17	3	1	1	1	0	hsa-miR-593-5p	-0.45	-0.45	N/A
HPS4	ENST00000398145.2	Hermansky-Pudlak syndrome 4	719	1	1	0	0	1	hsa-miR-593-5p	-0.44	-0.45	N/A
UBALD1	ENST00000590965.1	UBA-like domain containing 1	41	1	1	0	0	2	hsa-miR-593-5p	-0.44	-0.44	N/A
DSG2	ENST00000261590.8	desmoglein 2	810	1	0	0	1	1	hsa-miR-593-5p	-0.44	-0.46	N/A
SNX12	ENST00000374274.3	sorting nexin 12	849	1	1	0	0	0	hsa-miR-593-5p	-0.44	-0.44	N/A
SIRPA	ENST00000400068.3	signal-regulatory protein alpha	1235	1	1	0	0	0	hsa-miR-593-5p	-0.44	-0.52	N/A
C11orf72	ENST00000333139.3	chromosome 11 open reading frame 72	5	2	0	2	0	0	hsa-miR-593-5p	-0.44	-0.44	N/A
TM4SF1	ENST00000472441.1	transmembrane 4 L six family member 1	1401	1	1	0	0	0	hsa-miR-593-5p	-0.44	-0.44	N/A
H2BFM	ENST00000355016.3	H2B histone family, member M	5	1	1	0	0	0	hsa-miR-593-5p	-0.44	-0.44	N/A
PSEN2	ENST00000340188.4	presenilin 2 (Alzheimer disease 4)	613	1	1	0	0	0	hsa-miR-593-5p	-0.44	-0.45	N/A
MPV17	ENST00000402722.1	MpV17 mitochondrial inner membrane protein	1676	1	0	1	0	0	hsa-miR-593-5p	-0.44	-0.44	N/A
RPL37	ENST00000274242.5	ribosomal protein L37	1785	3	0	2	1	0	hsa-miR-593-5p	-0.44	-0.52	N/A
TNIP1	ENST00000520931.1	TNFAIP3 interacting protein 1	334	1	1	0	0	0	hsa-miR-593-5p	-0.44	-0.45	N/A
TSC22D3	ENST00000372390.4	TSC22 domain family, member 3	154	1	1	0	0	0	hsa-miR-593-5p	-0.44	-0.44	N/A
POLE3	ENST00000374169.3	polymerase (DNA directed), epsilon 3, accessory subunit	243	1	1	0	0	0	hsa-miR-593-5p	-0.44	-0.44	N/A
CDK5R2	ENST00000302625.4	cyclin-dependent kinase 5, regulatory subunit 2 (p39)	24	2	0	0	2	0	hsa-miR-593-5p	-0.44	-0.44	N/A
EDNRA	ENST00000339690.5	endothelin receptor type A	35	1	1	0	0	0	hsa-miR-593-5p	-0.43	-0.43	N/A
LRRC18	ENST00000374160.3	leucine rich repeat containing 18	5	1	1	0	0	1	hsa-miR-593-5p	-0.43	-0.43	N/A
AL359878.1	ENST00000381466.1	Uncharacterized protein	5	1	1	0	0	0	hsa-miR-593-5p	-0.43	-0.43	N/A
FOXR2	ENST00000339140.3	forkhead box R2	5	1	1	0	0	0	hsa-miR-593-5p	-0.43	-0.43	N/A
FLOT2	ENST00000394906.2	flotillin 2	37	2	0	2	0	0	hsa-miR-593-5p	-0.43	-0.43	N/A
TIRAP	ENST00000392679.1	toll-interleukin 1 receptor (TIR) domain containing adaptor protein	82	2	1	0	1	0	hsa-miR-593-5p	-0.43	-0.55	N/A
TRPM3	ENST00000377111.2	transient receptor potential cation channel, subfamily M, member 3	11	2	1	0	1	0	hsa-miR-593-5p	-0.43	-0.53	N/A
TUBB6	ENST00000591208.1	tubulin, beta 6 class V	5820	3	0	2	1	0	hsa-miR-593-5p	-0.43	-0.61	N/A
TCEANC2	ENST00000234827.1	transcription elongation factor A (SII) N-terminal and central domain containing 2	78	2	0	2	0	0	hsa-miR-593-5p	-0.43	-0.43	N/A
SLIT1	ENST00000266058.4	slit homolog 1 (Drosophila)	15	1	1	0	0	2	hsa-miR-593-5p	-0.43	-0.43	N/A
GPRIN2	ENST00000374314.4	G protein regulated inducer of neurite outgrowth 2	5	3	1	1	1	0	hsa-miR-593-5p	-0.43	-0.43	N/A
HIF3A	ENST00000377670.4	hypoxia inducible factor 3, alpha subunit	5	2	1	0	1	0	hsa-miR-593-5p	-0.43	-0.43	N/A
ADRBK1	ENST00000308595.5	adrenergic, beta, receptor kinase 1	1312	1	0	1	0	0	hsa-miR-593-5p	-0.43	-0.43	N/A
ARL8B	ENST00000419534.2	ADP-ribosylation factor-like 8B	664	1	1	0	0	0	hsa-miR-593-5p	-0.43	-0.45	N/A
BMP8B	ENST00000372827.3	bone morphogenetic protein 8b	88	1	1	0	0	0	hsa-miR-593-5p	-0.42	-0.42	N/A
AC007390.5	ENST00000402297.1	HCG1988162; Uncharacterized protein	223	1	1	0	0	0	hsa-miR-593-5p	-0.42	-0.44	N/A
KCNC1	ENST00000379472.3	potassium voltage-gated channel, Shaw-related subfamily, member 1	42	4	1	2	1	4	hsa-miR-593-5p	-0.42	-0.42	N/A
CSMD1	ENST00000400186.3	CUB and Sushi multiple domains 1	5	1	1	0	0	0	hsa-miR-593-5p	-0.42	-0.42	N/A
FAIM3	ENST00000420007.2	Fas apoptotic inhibitory molecule 3	311	1	1	0	0	0	hsa-miR-593-5p	-0.42	-0.43	N/A
POTEF	ENST00000361163.4	POTE ankyrin domain family, member F	5	1	1	0	0	0	hsa-miR-593-5p	-0.42	-0.42	N/A
PNP	ENST00000361505.5	purine nucleoside phosphorylase	50	1	1	0	0	0	hsa-miR-593-5p	-0.42	-0.43	N/A
SGMS2	ENST00000394684.4	sphingomyelin synthase 2	111	2	0	1	1	0	hsa-miR-593-5p	-0.42	-0.44	N/A
TMEM129	ENST00000303277.2	transmembrane protein 129	57	2	0	2	0	0	hsa-miR-593-5p	-0.42	-0.42	N/A
C20orf194	ENST00000453730.2	chromosome 20 open reading frame 194	1083	1	1	0	0	0	hsa-miR-593-5p	-0.42	-0.42	N/A
C21orf33	ENST00000291577.6	chromosome 21 open reading frame 33	1153	1	1	0	0	0	hsa-miR-593-5p	-0.42	-0.42	N/A
CYBRD1	ENST00000375252.3	cytochrome b reductase 1	4467	1	1	0	0	1	hsa-miR-593-5p	-0.42	-0.45	N/A
PPP1R8	ENST00000311772.5	protein phosphatase 1, regulatory subunit 8	1066	1	1	0	0	0	hsa-miR-593-5p	-0.42	-0.42	N/A
CHIC2	ENST00000263921.3	cysteine-rich hydrophobic domain 2	2509	1	0	1	0	0	hsa-miR-593-5p	-0.41	-0.41	N/A
AP001579.1	ENST00000599569.1	Uncharacterized protein	47	1	0	0	1	1	hsa-miR-593-5p	-0.41	-0.41	N/A
PLK1	ENST00000300093.4	polo-like kinase 1	1127	2	0	1	1	0	hsa-miR-593-5p	-0.41	-0.41	N/A
DOT1L	ENST00000398665.3	DOT1-like histone H3K79 methyltransferase	439	4	0	2	2	1	hsa-miR-593-5p	-0.41	-0.49	N/A
RASL10B	ENST00000268864.3	RAS-like, family 10, member B	1495	3	0	2	1	2	hsa-miR-593-5p	-0.41	-0.41	N/A
GOLGA7B	ENST00000370602.1	golgin A7 family, member B	5	3	0	1	2	1	hsa-miR-593-5p	-0.41	-0.55	N/A
ADAMTS13	ENST00000371916.1	ADAM metallopeptidase with thrombospondin type 1 motif, 13	41	3	0	2	1	1	hsa-miR-593-5p	-0.41	-0.41	N/A
ACO1	ENST00000309951.6	aconitase 1, soluble	738	1	1	0	0	0	hsa-miR-593-5p	-0.41	-0.41	N/A
TMEM194A	ENST00000379391.3	transmembrane protein 194A	43	3	0	3	0	0	hsa-miR-593-5p	-0.41	-0.48	N/A
C1orf200	ENST00000377320.3	chromosome 1 open reading frame 200	5	2	0	1	1	1	hsa-miR-593-5p	-0.41	-0.41	N/A
FOXK2	ENST00000335255.5	forkhead box K2	450	1	1	0	0	0	hsa-miR-593-5p	-0.41	-0.41	N/A
ZKSCAN2	ENST00000328086.7	zinc finger with KRAB and SCAN domains 2	81	3	2	1	0	0	hsa-miR-593-5p	-0.41	-0.42	N/A
C16orf62	ENST00000543152.1	chromosome 16 open reading frame 62	599	1	1	0	0	0	hsa-miR-593-5p	-0.41	-0.41	N/A
CARD16	ENST00000375704.3	caspase recruitment domain family, member 16	18	1	0	0	1	0	hsa-miR-593-5p	-0.4	-0.41	N/A
STC2	ENST00000265087.4	stanniocalcin 2	1112	1	1	0	0	1	hsa-miR-593-5p	-0.4	-0.42	N/A
DDIT4L	ENST00000273990.2	DNA-damage-inducible transcript 4-like	87	1	1	0	0	0	hsa-miR-593-5p	-0.4	-0.4	N/A
OVOL2	ENST00000278780.6	ovo-like 2 (Drosophila)	17	1	0	1	0	0	hsa-miR-593-5p	-0.4	-0.4	N/A
PDRG1	ENST00000202017.4	p53 and DNA-damage regulated 1	116	1	1	0	0	0	hsa-miR-593-5p	-0.4	-0.4	N/A
MIEF2	ENST00000395704.4	mitochondrial elongation factor 2	29	2	0	2	0	1	hsa-miR-593-5p	-0.4	-0.4	N/A
DDA1	ENST00000359866.4	DET1 and DDB1 associated 1	76	3	1	1	1	1	hsa-miR-593-5p	-0.4	-0.65	N/A
FAM53C	ENST00000513056.1	family with sequence similarity 53, member C	592	1	1	0	0	0	hsa-miR-593-5p	-0.4	-0.42	N/A
CNGB3	ENST00000320005.5	cyclic nucleotide gated channel beta 3	5	1	1	0	0	0	hsa-miR-593-5p	-0.4	-0.4	N/A
GPN2	ENST00000374135.4	GPN-loop GTPase 2	97	1	1	0	0	0	hsa-miR-593-5p	-0.4	-0.4	N/A
PORCN	ENST00000355961.4	porcupine homolog (Drosophila)	35	2	0	1	1	0	hsa-miR-593-5p	-0.4	-0.4	N/A
PXDC1	ENST00000380283.4	PX domain containing 1	1727	2	0	1	1	0	hsa-miR-593-5p	-0.4	-0.4	N/A
C14orf180	ENST00000557649.1	chromosome 14 open reading frame 180	5	2	0	0	2	0	hsa-miR-593-5p	-0.4	-0.4	N/A
CELF6	ENST00000287202.5	CUGBP, Elav-like family member 6	5	3	0	1	2	0	hsa-miR-593-5p	-0.4	-0.4	N/A
FN1	ENST00000357009.2	fibronectin 1	1064	2	1	0	1	0	hsa-miR-593-5p	-0.4	-0.47	N/A
PABPC1L	ENST00000537323.1	poly(A) binding protein, cytoplasmic 1-like	137	1	0	0	1	2	hsa-miR-593-5p	-0.4	-0.4	N/A
PLEKHN1	ENST00000379410.3	pleckstrin homology domain containing, family N member 1	5	1	1	0	0	1	hsa-miR-593-5p	-0.4	-0.4	N/A
SLC7A8	ENST00000316902.7	solute carrier family 7 (amino acid transporter light chain, L system), member 8	15	1	1	0	0	2	hsa-miR-593-5p	-0.4	-0.4	N/A
TRAF4	ENST00000262395.5	TNF receptor-associated factor 4	3123	1	0	1	0	2	hsa-miR-593-5p	-0.4	-0.4	N/A
SETD1A	ENST00000262519.8	SET domain containing 1A	14	2	1	1	0	2	hsa-miR-593-5p	-0.4	-0.51	N/A
CPNE3	ENST00000198765.4	copine III	756	2	0	2	0	1	hsa-miR-593-5p	-0.4	-0.41	N/A
AS3MT	ENST00000369880.3	arsenic (+3 oxidation state) methyltransferase	379	1	1	0	0	1	hsa-miR-593-5p	-0.4	-0.45	N/A
C2orf15	ENST00000512183.2	chromosome 2 open reading frame 15	246	1	1	0	0	0	hsa-miR-593-5p	-0.4	-0.42	N/A
MRPL30	ENST00000338148.3	mitochondrial ribosomal protein L30	246	1	1	0	0	0	hsa-miR-593-5p	-0.4	-0.42	N/A
ZNF395	ENST00000344423.5	zinc finger protein 395	1044	1	1	0	0	1	hsa-miR-593-5p	-0.4	-0.41	N/A
SLC7A4	ENST00000403586.1	solute carrier family 7, member 4	5	1	1	0	0	0	hsa-miR-593-5p	-0.4	-0.4	N/A
TIMP3	ENST00000266085.6	TIMP metallopeptidase inhibitor 3	7421	1	1	0	0	0	hsa-miR-593-5p	-0.39	-0.4	N/A
ITGAD	ENST00000389202.2	integrin, alpha D	5	1	1	0	0	0	hsa-miR-593-5p	-0.39	-0.39	N/A
STK36	ENST00000295709.3	serine/threonine kinase 36	218	1	1	0	0	0	hsa-miR-593-5p	-0.39	-0.41	N/A
TTYH3	ENST00000258796.7	tweety family member 3	188	3	1	1	1	3	hsa-miR-593-5p	-0.39	-0.39	N/A
DUSP21	ENST00000339042.4	dual specificity phosphatase 21	5	1	0	1	0	0	hsa-miR-593-5p	-0.39	-0.39	N/A
FLJ27365	ENST00000360737.3	hsa-mir-4763	74	2	0	0	2	1	hsa-miR-593-5p	-0.39	-0.46	N/A
RAB17	ENST00000264601.3	RAB17, member RAS oncogene family	84	1	1	0	0	0	hsa-miR-593-5p	-0.39	-0.39	N/A
HSDL1	ENST00000219439.4	hydroxysteroid dehydrogenase like 1	699	2	0	2	0	0	hsa-miR-593-5p	-0.39	-0.43	N/A
FAM57A	ENST00000308278.8	family with sequence similarity 57, member A	978	2	1	0	1	0	hsa-miR-593-5p	-0.39	-0.75	N/A
RHOU	ENST00000366691.3	ras homolog family member U	3519	3	0	2	1	0	hsa-miR-593-5p	-0.39	-0.41	N/A
ADCYAP1R1	ENST00000304166.4	adenylate cyclase activating polypeptide 1 (pituitary) receptor type I	9	4	0	1	3	3	hsa-miR-593-5p	-0.39	-0.61	N/A
TFCP2L1	ENST00000263707.5	transcription factor CP2-like 1	36	1	1	0	0	1	hsa-miR-593-5p	-0.39	-0.43	N/A
PCDHGA11	ENST00000398587.2	protocadherin gamma subfamily A, 11	145	2	1	0	1	1	hsa-miR-593-5p	-0.39	-0.4	N/A
THAP7	ENST00000215742.4	THAP domain containing 7	769	1	0	0	1	0	hsa-miR-593-5p	-0.39	-0.39	N/A
SMR3A	ENST00000226460.4	submaxillary gland androgen regulated protein 3A	5	1	0	0	1	0	hsa-miR-593-5p	-0.39	-0.39	N/A
RPS21	ENST00000370562.1	ribosomal protein S21	408	1	0	1	0	1	hsa-miR-593-5p	-0.39	-0.39	N/A
SLC30A3	ENST00000233535.4	solute carrier family 30 (zinc transporter), member 3	5	1	1	0	0	0	hsa-miR-593-5p	-0.39	-0.39	N/A
LNX2	ENST00000316334.3	ligand of numb-protein X 2	760	1	1	0	0	0	hsa-miR-593-5p	-0.39	-0.39	N/A
RPL3L	ENST00000268661.7	ribosomal protein L3-like	5	1	1	0	0	0	hsa-miR-593-5p	-0.39	-0.39	N/A
APOL4	ENST00000352371.1	apolipoprotein L, 4	0	2	0	2	0	0	hsa-miR-593-5p	-0.39	-0.39	N/A
RP1-32I10.10	ENST00000406912.1	Uncharacterized protein	5	1	0	0	1	0	hsa-miR-593-5p	-0.39	-0.39	N/A
NAP1L4	ENST00000380542.4	nucleosome assembly protein 1-like 4	7751	2	0	2	0	1	hsa-miR-593-5p	-0.39	-0.39	N/A
SURF4	ENST00000545297.1	surfeit 4	3667	1	1	0	0	0	hsa-miR-593-5p	-0.39	-0.44	N/A
LY6E	ENST00000517503.1	lymphocyte antigen 6 complex, locus E	342	1	0	1	0	1	hsa-miR-593-5p	-0.39	-0.4	N/A
RAX	ENST00000256852.7	retina and anterior neural fold homeobox	5	2	0	1	1	1	hsa-miR-593-5p	-0.39	-0.39	N/A
PIGW	ENST00000328396.2	phosphatidylinositol glycan anchor biosynthesis, class W	265	1	1	0	0	0	hsa-miR-593-5p	-0.39	-0.39	N/A
BCL11B	ENST00000357195.3	B-cell CLL/lymphoma 11B (zinc finger protein)	73	2	0	1	1	1	hsa-miR-593-5p	-0.39	-0.39	N/A
AC010336.1	ENST00000539278.1	Uncharacterized protein	8	1	1	0	0	0	hsa-miR-593-5p	-0.39	-0.39	N/A
KLHL24	ENST00000454652.2	kelch-like family member 24	143	2	1	1	0	0	hsa-miR-593-5p	-0.38	-0.49	N/A
NOS1AP	ENST00000361897.5	nitric oxide synthase 1 (neuronal) adaptor protein	5	2	0	1	1	0	hsa-miR-593-5p	-0.38	-0.38	N/A
CD28	ENST00000324106.8	CD28 molecule	5	1	1	0	0	1	hsa-miR-593-5p	-0.38	-0.38	N/A
GRM1	ENST00000392299.2	glutamate receptor, metabotropic 1	5	1	1	0	0	2	hsa-miR-593-5p	-0.38	-0.38	N/A
IKBKG	ENST00000393549.2	inhibitor of kappa light polypeptide gene enhancer in B-cells, kinase gamma	5	2	1	0	1	1	hsa-miR-593-5p	-0.38	-0.38	N/A
CCND2	ENST00000261254.3	cyclin D2	66	1	0	1	0	1	hsa-miR-593-5p	-0.38	-0.39	N/A
AL078585.1	ENST00000419182.1	Uncharacterized protein; cDNA FLJ58069	5	1	0	1	0	0	hsa-miR-593-5p	-0.38	-0.38	N/A
WIPF2	ENST00000323571.4	WAS/WASL interacting protein family, member 2	214	2	1	1	0	1	hsa-miR-593-5p	-0.38	-0.58	N/A
GAB2	ENST00000340149.2	GRB2-associated binding protein 2	627	3	0	3	0	1	hsa-miR-593-5p	-0.38	-0.39	N/A
OTUD7A	ENST00000307050.4	OTU domain containing 7A	35	2	0	2	0	1	hsa-miR-593-5p	-0.38	-0.46	N/A
KIF3B	ENST00000375712.3	kinesin family member 3B	182	2	1	1	0	2	hsa-miR-593-5p	-0.38	-0.38	N/A
APCDD1L	ENST00000371149.3	adenomatosis polyposis coli down-regulated 1-like	21	1	1	0	0	0	hsa-miR-593-5p	-0.38	-0.38	N/A
GAL3ST1	ENST00000406955.1	galactose-3-O-sulfotransferase 1	470	1	1	0	0	0	hsa-miR-593-5p	-0.38	-0.38	N/A
FAM27E1	ENST00000377525.1	family with sequence similarity 27, member E1	5	1	0	0	1	1	hsa-miR-593-5p	-0.38	-0.38	N/A
TUSC1	ENST00000358022.3	tumor suppressor candidate 1	987	1	0	0	1	1	hsa-miR-593-5p	-0.38	-0.38	N/A
RAB35	ENST00000534951.1	RAB35, member RAS oncogene family	1051	2	0	1	1	1	hsa-miR-593-5p	-0.38	-0.39	N/A
PBLD	ENST00000336578.1	phenazine biosynthesis-like protein domain containing	44	1	1	0	0	0	hsa-miR-593-5p	-0.38	-0.38	N/A
SERF1A	ENST00000354833.3	small EDRK-rich factor 1A (telomeric)	5	1	1	0	0	0	hsa-miR-593-5p	-0.38	-0.38	N/A
BCL2L11	ENST00000393256.3	BCL2-like 11 (apoptosis facilitator)	105	2	1	1	0	0	hsa-miR-593-5p	-0.38	-0.5	N/A
DOK1	ENST00000340004.6	docking protein 1, 62kDa (downstream of tyrosine kinase 1)	331	1	1	0	0	0	hsa-miR-593-5p	-0.38	-0.38	N/A
SP7	ENST00000536324.2	Sp7 transcription factor	5	2	0	1	1	0	hsa-miR-593-5p	-0.38	-0.38	N/A
PCDHGB6	ENST00000520790.1	protocadherin gamma subfamily B, 6	145	2	1	0	1	1	hsa-miR-593-5p	-0.38	-0.38	N/A
PCDHGA5	ENST00000518069.1	protocadherin gamma subfamily A, 5	145	2	1	0	1	1	hsa-miR-593-5p	-0.38	-0.38	N/A
PCDHGA1	ENST00000517417.1	protocadherin gamma subfamily A, 1	145	2	1	0	1	1	hsa-miR-593-5p	-0.38	-0.38	N/A
PCDHGB4	ENST00000519479.1	protocadherin gamma subfamily B, 4	145	2	1	0	1	1	hsa-miR-593-5p	-0.38	-0.38	N/A
PCDHGB3	ENST00000576222.1	protocadherin gamma subfamily B, 3	145	2	1	0	1	1	hsa-miR-593-5p	-0.38	-0.38	N/A
PCDHGB7	ENST00000398594.2	protocadherin gamma subfamily B, 7	145	2	1	0	1	1	hsa-miR-593-5p	-0.38	-0.38	N/A
AC092675.3	ENST00000409490.1	Uncharacterized protein	5	1	0	0	1	0	hsa-miR-593-5p	-0.38	-0.38	N/A
PCDHGA4	ENST00000571252.1	protocadherin gamma subfamily A, 4	145	2	1	0	1	1	hsa-miR-593-5p	-0.38	-0.38	N/A
PCDHGA9	ENST00000573521.1	protocadherin gamma subfamily A, 9	145	2	1	0	1	1	hsa-miR-593-5p	-0.37	-0.37	N/A
PCDHGA7	ENST00000518325.1	protocadherin gamma subfamily A, 7	145	2	1	0	1	1	hsa-miR-593-5p	-0.37	-0.37	N/A
PCDHGA2	ENST00000394576.2	protocadherin gamma subfamily A, 2	145	2	1	0	1	1	hsa-miR-593-5p	-0.37	-0.37	N/A
PCDHGA8	ENST00000398604.2	protocadherin gamma subfamily A, 8	145	2	1	0	1	1	hsa-miR-593-5p	-0.37	-0.37	N/A
PCDHGA3	ENST00000253812.6	protocadherin gamma subfamily A, 3	145	2	1	0	1	1	hsa-miR-593-5p	-0.37	-0.37	N/A
PCDHGA12	ENST00000252085.3	protocadherin gamma subfamily A, 12	145	2	1	0	1	1	hsa-miR-593-5p	-0.37	-0.37	N/A
PCDHGA6	ENST00000517434.1	protocadherin gamma subfamily A, 6	145	2	1	0	1	1	hsa-miR-593-5p	-0.37	-0.37	N/A
JMJD4	ENST00000366758.3	jumonji domain containing 4	1570	1	1	0	0	1	hsa-miR-593-5p	-0.37	-0.44	N/A
AQP7	ENST00000537089.1	aquaporin 7	10	2	1	0	1	2	hsa-miR-593-5p	-0.37	-0.51	N/A
PTPDC1	ENST00000375360.3	protein tyrosine phosphatase domain containing 1	46	1	1	0	0	0	hsa-miR-593-5p	-0.37	-0.67	N/A
PCDHGC3	ENST00000308177.3	protocadherin gamma subfamily C, 3	145	2	1	0	1	1	hsa-miR-593-5p	-0.37	-0.37	N/A
SPRY3	ENST00000302805.2	sprouty homolog 3 (Drosophila)	5	1	1	0	0	0	hsa-miR-593-5p	-0.37	-0.37	N/A
WNT2B	ENST00000369686.5	wingless-type MMTV integration site family, member 2B	5	2	1	0	1	0	hsa-miR-593-5p	-0.37	-0.37	N/A
PCDHGC4	ENST00000306593.1	protocadherin gamma subfamily C, 4	145	2	1	0	1	1	hsa-miR-593-5p	-0.37	-0.37	N/A
PCDHGA10	ENST00000398610.2	protocadherin gamma subfamily A, 10	145	2	1	0	1	1	hsa-miR-593-5p	-0.37	-0.37	N/A
PRICKLE1	ENST00000455697.1	prickle homolog 1 (Drosophila)	146	2	1	1	0	2	hsa-miR-593-5p	-0.37	-0.55	N/A
PCDHGC5	ENST00000252087.1	protocadherin gamma subfamily C, 5	145	2	1	0	1	1	hsa-miR-593-5p	-0.37	-0.37	N/A
FBLIM1	ENST00000375771.1	filamin binding LIM protein 1	581	1	1	0	0	1	hsa-miR-593-5p	-0.37	-0.37	N/A
CCND1	ENST00000227507.2	cyclin D1	4687	1	1	0	0	1	hsa-miR-593-5p	-0.37	-0.39	N/A
LRRC58	ENST00000295628.3	leucine rich repeat containing 58	940	2	1	0	1	0	hsa-miR-593-5p	-0.37	-0.37	N/A
NOL9	ENST00000377705.5	nucleolar protein 9	194	2	0	2	0	1	hsa-miR-593-5p	-0.37	-0.42	N/A
DLX5	ENST00000222598.4	distal-less homeobox 5	20	1	0	1	0	0	hsa-miR-593-5p	-0.37	-0.37	N/A
C17orf51	ENST00000391411.5	chromosome 17 open reading frame 51	464	3	0	1	2	2	hsa-miR-593-5p	-0.37	-0.5	N/A
SLC25A44	ENST00000359511.4	solute carrier family 25, member 44	760	2	1	0	1	0	hsa-miR-593-5p	-0.37	-0.37	N/A
SCTR	ENST00000019103.5	secretin receptor	7	1	0	1	0	0	hsa-miR-593-5p	-0.37	-0.37	N/A
PRUNE2	ENST00000376718.3	prune homolog 2 (Drosophila)	121	1	1	0	0	0	hsa-miR-593-5p	-0.37	-0.37	N/A
PPAPDC3	ENST00000372264.3	phosphatidic acid phosphatase type 2 domain containing 3	705	1	0	0	1	1	hsa-miR-593-5p	-0.37	-0.37	N/A
LRCH2	ENST00000317135.8	leucine-rich repeats and calponin homology (CH) domain containing 2	52	1	1	0	0	0	hsa-miR-593-5p	-0.37	-0.37	N/A
ARID3B	ENST00000346246.5	AT rich interactive domain 3B (BRIGHT-like)	11	3	1	0	2	1	hsa-miR-593-5p	-0.37	-0.37	N/A
PRMT2	ENST00000458387.2	protein arginine methyltransferase 2	584	2	0	2	0	0	hsa-miR-593-5p	-0.37	-0.37	N/A
CDCA7L	ENST00000356195.5	cell division cycle associated 7-like	292	1	0	1	0	0	hsa-miR-593-5p	-0.37	-0.37	N/A
SP1	ENST00000426431.2	Sp1 transcription factor	402	3	1	2	0	0	hsa-miR-593-5p	-0.37	-0.47	N/A
RIPK4	ENST00000332512.3	receptor-interacting serine-threonine kinase 4	112	1	1	0	0	1	hsa-miR-593-5p	-0.37	-0.37	N/A
CTD-2267D19.3	ENST00000578774.1	Uncharacterized protein	110	2	0	2	0	1	hsa-miR-593-5p	-0.37	-0.37	N/A
RFNG	ENST00000310496.4	RFNG O-fucosylpeptide 3-beta-N-acetylglucosaminyltransferase	242	2	0	1	1	0	hsa-miR-593-5p	-0.37	-0.37	N/A
VPS52	ENST00000482399.1	vacuolar protein sorting 52 homolog (S. cerevisiae)	124	2	0	2	0	0	hsa-miR-593-5p	-0.36	-0.36	N/A
FAM27E3	ENST00000455764.2	family with sequence similarity 27, member E3	5	1	0	0	1	1	hsa-miR-593-5p	-0.36	-0.36	N/A
CLDN20	ENST00000367165.3	claudin 20	5	1	0	0	1	0	hsa-miR-593-5p	-0.36	-0.36	N/A
UNKL	ENST00000389221.4	unkempt homolog (Drosophila)-like	308	2	1	1	0	2	hsa-miR-593-5p	-0.36	-0.4	N/A
C2orf54	ENST00000402775.2	chromosome 2 open reading frame 54	13	1	0	0	1	0	hsa-miR-593-5p	-0.36	-0.36	N/A
FAM126B	ENST00000418596.3	family with sequence similarity 126, member B	132	1	1	0	0	0	hsa-miR-593-5p	-0.36	-0.37	N/A
RAB27B	ENST00000262094.5	RAB27B, member RAS oncogene family	5	1	1	0	0	1	hsa-miR-593-5p	-0.36	-0.36	N/A
SAMD12	ENST00000409003.4	sterile alpha motif domain containing 12	57	2	1	0	1	0	hsa-miR-593-5p	-0.36	-0.36	N/A
PIGR	ENST00000356495.4	polymeric immunoglobulin receptor	13	1	1	0	0	0	hsa-miR-593-5p	-0.36	-0.36	N/A
PRICKLE2	ENST00000295902.6	prickle homolog 2 (Drosophila)	20	2	1	1	0	0	hsa-miR-593-5p	-0.36	-0.36	N/A
GRAMD4	ENST00000361034.3	GRAM domain containing 4	403	2	0	2	0	3	hsa-miR-593-5p	-0.36	-0.37	N/A
OR2W3	ENST00000537741.1	olfactory receptor, family 2, subfamily W, member 3	23	1	1	0	0	0	hsa-miR-593-5p	-0.36	-0.36	N/A
ACAD8	ENST00000281182.4	acyl-CoA dehydrogenase family, member 8	329	1	1	0	0	0	hsa-miR-593-5p	-0.36	-0.36	N/A
PMP22	ENST00000395938.2	peripheral myelin protein 22	1152	1	0	1	0	0	hsa-miR-593-5p	-0.36	-0.36	N/A
GALNTL6	ENST00000506823.1	UDP-N-acetyl-alpha-D-galactosamine:polypeptide N-acetylgalactosaminyltransferase-like 6	26	1	1	0	0	0	hsa-miR-593-5p	-0.36	-0.36	N/A
GYPC	ENST00000259254.4	glycophorin C (Gerbich blood group)	243	1	0	0	1	1	hsa-miR-593-5p	-0.36	-0.36	N/A
HGSNAT	ENST00000379644.4	heparan-alpha-glucosaminide N-acetyltransferase	865	1	1	0	0	1	hsa-miR-593-5p	-0.36	-0.37	N/A
APLNR	ENST00000606794.1	apelin receptor	5	1	1	0	0	1	hsa-miR-593-5p	-0.36	-0.36	N/A
PEAR1	ENST00000292357.7	platelet endothelial aggregation receptor 1	160	2	0	0	2	1	hsa-miR-593-5p	-0.36	-0.36	N/A
SERPINA5	ENST00000329597.7	serpin peptidase inhibitor, clade A (alpha-1 antiproteinase, antitrypsin), member 5	7834	1	0	0	1	1	hsa-miR-593-5p	-0.36	-0.36	N/A
ZNF496	ENST00000294753.4	zinc finger protein 496	391	3*	1	1	0	0	hsa-miR-593-5p	-0.36	-0.36	N/A
NAALADL1	ENST00000339885.2	N-acetylated alpha-linked acidic dipeptidase-like 1	5	1	1	0	0	0	hsa-miR-593-5p	-0.36	-0.36	N/A
ZNF609	ENST00000326648.3	zinc finger protein 609	103	1	0	1	0	1	hsa-miR-593-5p	-0.36	-0.36	N/A
ST3GAL4	ENST00000444328.2	ST3 beta-galactoside alpha-2,3-sialyltransferase 4	27	1	1	0	0	1	hsa-miR-593-5p	-0.36	-0.36	N/A
ZNF652	ENST00000362063.2	zinc finger protein 652	33	1	1	0	0	0	hsa-miR-593-5p	-0.36	-0.36	N/A
IL17RD	ENST00000296318.7	interleukin 17 receptor D	108	4	0	2	2	0	hsa-miR-593-5p	-0.36	-0.41	N/A
UBE2W	ENST00000517608.1	ubiquitin-conjugating enzyme E2W (putative)	102	1	1	0	0	0	hsa-miR-593-5p	-0.36	-0.44	N/A
CAMKK2	ENST00000538733.1	calcium/calmodulin-dependent protein kinase kinase 2, beta	1157	1	1	0	0	0	hsa-miR-593-5p	-0.35	-0.47	N/A
AGAP3	ENST00000463381.1	ArfGAP with GTPase domain, ankyrin repeat and PH domain 3	1871	1	0	0	1	1	hsa-miR-593-5p	-0.35	-0.35	N/A
NIP7	ENST00000254940.5	NIP7, nucleolar pre-rRNA processing protein	659	1	1	0	0	0	hsa-miR-593-5p	-0.35	-0.42	N/A
SAPCD2	ENST00000409687.3	suppressor APC domain containing 2	22	1	0	0	1	3	hsa-miR-593-5p	-0.35	-0.35	N/A
CASP9	ENST00000546424.1	caspase 9, apoptosis-related cysteine peptidase	390	1	1	0	0	0	hsa-miR-593-5p	-0.35	-0.35	N/A
ORAOV1	ENST00000279147.4	oral cancer overexpressed 1	78	2	0	2	0	0	hsa-miR-593-5p	-0.35	-0.35	N/A
CYB561D1	ENST00000496961.1	cytochrome b561 family, member D1	105	1	1	0	0	0	hsa-miR-593-5p	-0.35	-0.35	N/A
TSFM	ENST00000540550.1	Ts translation elongation factor, mitochondrial	1340	1	0	0	1	0	hsa-miR-593-5p	-0.35	-0.35	N/A
SLC38A7	ENST00000570101.1	solute carrier family 38, member 7	635	2	0	1	1	1	hsa-miR-593-5p	-0.35	-0.42	N/A
P2RY8	ENST00000381297.4	purinergic receptor P2Y, G-protein coupled, 8	5	2	0	1	1	1	hsa-miR-593-5p	-0.35	-0.35	N/A
PLEC	ENST00000345136.3	plectin	7	1	0	1	0	2	hsa-miR-593-5p	-0.35	-0.35	N/A
AC131097.4	ENST00000404031.1	Protein LOC285095	5	1	0	1	0	0	hsa-miR-593-5p	-0.35	-0.35	N/A
AGTRAP	ENST00000376627.2	angiotensin II receptor-associated protein	3213	4	0	3	1	1	hsa-miR-593-5p	-0.35	-0.78	N/A
PRCP	ENST00000313010.3	prolylcarboxypeptidase (angiotensinase C)	148	1	1	0	0	0	hsa-miR-593-5p	-0.35	-0.39	N/A
PPP6R1	ENST00000412770.2	protein phosphatase 6, regulatory subunit 1	292	2	1	0	1	0	hsa-miR-593-5p	-0.35	-0.37	N/A
C21orf119	ENST00000534991.2	chromosome 21 open reading frame 119	9	1	0	0	1	1	hsa-miR-593-5p	-0.35	-0.35	N/A
COL13A1	ENST00000398974.3	collagen, type XIII, alpha 1	628	1	1	0	0	0	hsa-miR-593-5p	-0.35	-0.4	N/A
RAP2B	ENST00000323534.2	RAP2B, member of RAS oncogene family	594	2	0	0	2	0	hsa-miR-593-5p	-0.35	-0.35	N/A
SMAP1	ENST00000370455.3	small ArfGAP 1	64	1	0	1	0	0	hsa-miR-593-5p	-0.35	-0.35	N/A
PRKAB2	ENST00000254101.3	protein kinase, AMP-activated, beta 2 non-catalytic subunit	363	1	1	0	0	0	hsa-miR-593-5p	-0.35	-0.35	N/A
APOC1	ENST00000252491.4	apolipoprotein C-I	2369	1	0	0	1	0	hsa-miR-593-5p	-0.35	-0.35	N/A
CECR6	ENST00000399875.1	cat eye syndrome chromosome region, candidate 6	5	2	1	1	0	1	hsa-miR-593-5p	-0.35	-0.35	N/A
CACFD1	ENST00000291722.7	calcium channel flower domain containing 1	1315	3	0	2	1	2	hsa-miR-593-5p	-0.34	-0.64	N/A
FGFR1OP	ENST00000366847.4	FGFR1 oncogene partner	552	2	0	2	0	5	hsa-miR-593-5p	-0.34	-0.38	N/A
RAB11FIP2	ENST00000355624.3	RAB11 family interacting protein 2 (class I)	449	1	1	0	0	0	hsa-miR-593-5p	-0.34	-0.35	N/A
GIT2	ENST00000355312.3	G protein-coupled receptor kinase interacting ArfGAP 2	924	2	1	0	1	0	hsa-miR-593-5p	-0.34	-0.36	N/A
KIAA0513	ENST00000566428.1	KIAA0513	5	1	0	1	0	2	hsa-miR-593-5p	-0.34	-0.34	N/A
KIRREL	ENST00000368172.1	kin of IRRE like (Drosophila)	493	1	0	1	0	3	hsa-miR-593-5p	-0.34	-0.36	N/A
APC2	ENST00000233607.2	adenomatosis polyposis coli 2	10	1	1	0	0	1	hsa-miR-593-5p	-0.34	-0.34	N/A
VSTM4	ENST00000332853.4	V-set and transmembrane domain containing 4	59	3	0	2	1	4	hsa-miR-593-5p	-0.34	-0.59	N/A
WDR82	ENST00000296490.3	WD repeat domain 82	319	1	0	0	1	1	hsa-miR-593-5p	-0.34	-0.35	N/A
MFSD5	ENST00000534842.1	major facilitator superfamily domain containing 5	160	1	0	0	1	0	hsa-miR-593-5p	-0.34	-0.34	N/A
DTX3L	ENST00000296161.4	deltex 3-like (Drosophila)	319	2	0	1	1	1	hsa-miR-593-5p	-0.34	-0.35	N/A
CSTF3	ENST00000323959.4	cleavage stimulation factor, 3' pre-RNA, subunit 3, 77kDa	291	1	0	1	0	0	hsa-miR-593-5p	-0.34	-0.34	N/A
ACVR1B	ENST00000257963.4	activin A receptor, type IB	3319	3	0	2	1	0	hsa-miR-593-5p	-0.34	-0.34	N/A
C7orf55-LUC7L2	ENST00000354926.4	C7orf55-LUC7L2 readthrough	419	2	1	1	0	0	hsa-miR-593-5p	-0.34	-0.55	N/A
TMIE	ENST00000326431.3	transmembrane inner ear	26	1	1	0	0	1	hsa-miR-593-5p	-0.34	-0.34	N/A
KCNA6	ENST00000433855.1	potassium voltage-gated channel, shaker-related subfamily, member 6	5	2	0	0	2	0	hsa-miR-593-5p	-0.34	-0.34	N/A
CDC42SE1	ENST00000439374.2	CDC42 small effector 1	231	1	0	0	1	1	hsa-miR-593-5p	-0.34	-0.34	N/A
CBX2	ENST00000310942.4	chromobox homolog 2	1816	1	0	1	0	1	hsa-miR-593-5p	-0.34	-0.34	N/A
UNC119B	ENST00000344651.4	unc-119 homolog B (C. elegans)	5	2	1	0	1	1	hsa-miR-593-5p	-0.34	-0.34	N/A
ZNF75D	ENST00000370766.3	zinc finger protein 75D	5	1	1	0	0	0	hsa-miR-593-5p	-0.34	-0.34	N/A
TEDDM1	ENST00000367565.1	transmembrane epididymal protein 1	5	1	1	0	0	0	hsa-miR-593-5p	-0.34	-0.34	N/A
KLHL38	ENST00000325995.7	kelch-like family member 38	13	2	2	0	0	1	hsa-miR-593-5p	-0.34	-0.86	N/A
DAP	ENST00000230895.6	death-associated protein	8552	1	0	0	1	0	hsa-miR-593-5p	-0.34	-0.34	N/A
ZMYND19	ENST00000298585.2	zinc finger, MYND-type containing 19	1574	1	0	0	1	0	hsa-miR-593-5p	-0.34	-0.34	N/A
RPP14	ENST00000445193.3	ribonuclease P/MRP 14kDa subunit	1612	1	0	1	0	0	hsa-miR-593-5p	-0.34	-0.34	N/A
CRABP1	ENST00000299529.6	cellular retinoic acid binding protein 1	164	1	0	1	0	0	hsa-miR-593-5p	-0.34	-0.34	N/A
NUDT7	ENST00000564085.1	nudix (nucleoside diphosphate linked moiety X)-type motif 7	50	1	0	1	0	0	hsa-miR-593-5p	-0.34	-0.34	N/A
SCN4A	ENST00000578147.1	sodium channel, voltage-gated, type IV, alpha subunit	5	2	0	2	0	0	hsa-miR-593-5p	-0.33	-0.33	N/A
RRP12	ENST00000370992.4	ribosomal RNA processing 12 homolog (S. cerevisiae)	177	2	0	1	1	0	hsa-miR-593-5p	-0.33	-0.33	N/A
NRIP3	ENST00000309166.3	nuclear receptor interacting protein 3	58	2	0	1	1	0	hsa-miR-593-5p	-0.33	-0.37	N/A
MAVS	ENST00000428216.2	mitochondrial antiviral signaling protein	211	1	0	0	1	3	hsa-miR-593-5p	-0.33	-0.54	N/A
NTM	ENST00000374791.3	neurotrimin	231	1	1	0	0	0	hsa-miR-593-5p	-0.33	-0.39	N/A
ABTB2	ENST00000435224.2	ankyrin repeat and BTB (POZ) domain containing 2	5	2	0	1	1	0	hsa-miR-593-5p	-0.33	-0.33	N/A
LRRC14B	ENST00000328278.3	leucine rich repeat containing 14B	0	1	0	0	1	2	hsa-miR-593-5p	-0.33	-0.33	N/A
ZNF593	ENST00000270812.5	zinc finger protein 593	3221	1	0	1	0	0	hsa-miR-593-5p	-0.33	-0.33	N/A
GLB1L2	ENST00000339772.7	galactosidase, beta 1-like 2	38	1	1	0	0	0	hsa-miR-593-5p	-0.33	-0.33	N/A
CBL	ENST00000264033.4	Cbl proto-oncogene, E3 ubiquitin protein ligase	309	1	1	0	0	1	hsa-miR-593-5p	-0.33	-0.33	N/A
FRMD5	ENST00000484674.1	FERM domain containing 5	161	2	2	0	0	0	hsa-miR-593-5p	-0.33	-0.73	N/A
CSH1	ENST00000453363.3	chorionic somatomammotropin hormone 1 (placental lactogen)	5	1	0	0	1	0	hsa-miR-593-5p	-0.33	-0.33	N/A
GRM5	ENST00000418177.2	glutamate receptor, metabotropic 5	5	2	1	1	0	0	hsa-miR-593-5p	-0.33	-0.33	N/A
NEIL2	ENST00000284503.6	nei endonuclease VIII-like 2 (E. coli)	59	1	0	0	1	1	hsa-miR-593-5p	-0.33	-0.33	N/A
MRTO4	ENST00000330263.4	mRNA turnover 4 homolog (S. cerevisiae)	2127	3	1	1	1	0	hsa-miR-593-5p	-0.33	-0.56	N/A
C10orf53	ENST00000374113.3	chromosome 10 open reading frame 53	5	1	0	0	1	0	hsa-miR-593-5p	-0.33	-0.33	N/A
KPNA3	ENST00000261667.3	karyopherin alpha 3 (importin alpha 4)	104	1	1	0	0	1	hsa-miR-593-5p	-0.33	-0.37	N/A
CCDC126	ENST00000307471.3	coiled-coil domain containing 126	846	1	0	1	0	0	hsa-miR-593-5p	-0.33	-0.36	N/A
ADAMTS15	ENST00000299164.2	ADAM metallopeptidase with thrombospondin type 1 motif, 15	18	2	0	0	2	0	hsa-miR-593-5p	-0.33	-0.33	N/A
GJA4	ENST00000342280.4	gap junction protein, alpha 4, 37kDa	5	2	0	2	0	0	hsa-miR-593-5p	-0.33	-0.33	N/A
HRNR	ENST00000368801.2	hornerin	5	1	1	0	0	0	hsa-miR-593-5p	-0.33	-0.33	N/A
LUC7L2	ENST00000541515.3	LUC7-like 2 (S. cerevisiae)	419	2	1	1	0	0	hsa-miR-593-5p	-0.33	-0.53	N/A
CTC1	ENST00000315684.8	CTS telomere maintenance complex component 1	252	1	1	0	0	1	hsa-miR-593-5p	-0.33	-0.42	N/A
ZCCHC24	ENST00000372336.3	zinc finger, CCHC domain containing 24	359	2	0	0	2	1	hsa-miR-593-5p	-0.33	-0.33	N/A
PRR9	ENST00000368744.3	proline rich 9	5	1	0	1	0	0	hsa-miR-593-5p	-0.33	-0.33	N/A
CRISPLD1	ENST00000262207.4	cysteine-rich secretory protein LCCL domain containing 1	358	1	0	0	1	0	hsa-miR-593-5p	-0.33	-0.33	N/A
TBC1D10C	ENST00000526387.1	TBC1 domain family, member 10C	5	1	0	1	0	1	hsa-miR-593-5p	-0.33	-0.33	N/A
CLEC11A	ENST00000250340.4	C-type lectin domain family 11, member A	1978	1	0	0	1	1	hsa-miR-593-5p	-0.33	-0.33	N/A
NPC1	ENST00000269228.5	Niemann-Pick disease, type C1	257	1	1	0	0	0	hsa-miR-593-5p	-0.33	-0.33	N/A
TBC1D4	ENST00000377636.3	TBC1 domain family, member 4	96	1	1	0	0	0	hsa-miR-593-5p	-0.33	-0.33	N/A
RP11-57H12.6	ENST00000604534.1	TMEM56-RWDD3 protein	49	1	0	0	1	0	hsa-miR-593-5p	-0.33	-0.33	N/A
DUSP3	ENST00000226004.3	dual specificity phosphatase 3	836	2	1	1	0	1	hsa-miR-593-5p	-0.33	-0.51	N/A
FBXO41	ENST00000295133.5	F-box protein 41	175	2	1	1	0	0	hsa-miR-593-5p	-0.33	-0.34	N/A
GOLGA6A	ENST00000290438.3	golgin A6 family, member A	5	1	1	0	0	0	hsa-miR-593-5p	-0.33	-0.33	N/A
WFDC13	ENST00000305479.2	WAP four-disulfide core domain 13	5	1	0	0	1	0	hsa-miR-593-5p	-0.33	-0.33	N/A
FAM78B	ENST00000354422.3	family with sequence similarity 78, member B	9	1	0	0	1	0	hsa-miR-593-5p	-0.33	-0.33	N/A
AP4S1	ENST00000334725.4	adaptor-related protein complex 4, sigma 1 subunit	12	1	0	1	0	0	hsa-miR-593-5p	-0.33	-0.33	N/A
TYRO3	ENST00000263798.3	TYRO3 protein tyrosine kinase	70	1	0	0	1	3	hsa-miR-593-5p	-0.33	-0.51	N/A
TPPP	ENST00000360578.5	tubulin polymerization promoting protein	7	2	1	1	0	2	hsa-miR-593-5p	-0.33	-0.33	N/A
SLC25A51	ENST00000380590.3	solute carrier family 25, member 51	170	2	1	1	0	0	hsa-miR-593-5p	-0.32	-0.34	N/A
TPCN2	ENST00000294309.3	two pore segment channel 2	629	3	0	2	1	1	hsa-miR-593-5p	-0.32	-0.46	N/A
PLK3	ENST00000372201.4	polo-like kinase 3	229	1	0	1	0	0	hsa-miR-593-5p	-0.32	-0.32	N/A
WFDC12	ENST00000372785.3	WAP four-disulfide core domain 12	5	1	0	1	0	0	hsa-miR-593-5p	-0.32	-0.32	N/A
MTA1	ENST00000331320.7	metastasis associated 1	8	1	0	0	1	0	hsa-miR-593-5p	-0.32	-0.32	N/A
ADCY5	ENST00000462833.1	adenylate cyclase 5	25	3	1	1	1	0	hsa-miR-593-5p	-0.32	-0.33	N/A
GOLT1B	ENST00000540141.1	golgi transport 1B	848	1	0	1	0	1	hsa-miR-593-5p	-0.32	-0.38	N/A
ERBB2	ENST00000584450.1	v-erb-b2 avian erythroblastic leukemia viral oncogene homolog 2	511	1	1	0	0	1	hsa-miR-593-5p	-0.32	-0.32	N/A
FAM53B	ENST00000337318.3	family with sequence similarity 53, member B	27	2	0	0	2	1	hsa-miR-593-5p	-0.32	-0.32	N/A
CSH2	ENST00000336844.5	chorionic somatomammotropin hormone 2	5	1	0	0	1	1	hsa-miR-593-5p	-0.32	-0.32	N/A
PHYHIP	ENST00000321613.3	phytanoyl-CoA 2-hydroxylase interacting protein	14	1	1	0	0	1	hsa-miR-593-5p	-0.32	-0.32	N/A
MIF4GD	ENST00000578305.1	MIF4G domain containing	25	1	0	1	0	0	hsa-miR-593-5p	-0.32	-0.41	N/A
LGI3	ENST00000306317.2	leucine-rich repeat LGI family, member 3	5	1	1	0	0	1	hsa-miR-593-5p	-0.32	-0.32	N/A
AL009178.1	ENST00000597278.1	Uncharacterized protein; cDNA FLJ43200 fis, clone FEBRA2007793	5	1	1	0	0	1	hsa-miR-593-5p	-0.32	-0.32	N/A
RPS15A	ENST00000576436.1	ribosomal protein S15a	24	1	0	1	0	0	hsa-miR-593-5p	-0.32	-0.32	N/A
MIPOL1	ENST00000327441.7	mirror-image polydactyly 1	45	1	0	0	1	0	hsa-miR-593-5p	-0.32	-0.32	N/A
PIK3C2A	ENST00000265970.7	phosphatidylinositol-4-phosphate 3-kinase, catalytic subunit type 2 alpha	280	2	0	2	0	0	hsa-miR-593-5p	-0.32	-0.34	N/A
RAD51D	ENST00000345365.6	RAD51 paralog D	73	2	1	1	0	0	hsa-miR-593-5p	-0.32	-0.63	N/A
C1orf159	ENST00000379339.1	chromosome 1 open reading frame 159	179	1	0	0	1	3	hsa-miR-593-5p	-0.32	-0.33	N/A
RTP1	ENST00000312295.4	receptor (chemosensory) transporter protein 1	5	1	0	0	1	1	hsa-miR-593-5p	-0.32	-0.32	N/A
GPR137	ENST00000539851.1	G protein-coupled receptor 137	202	1	0	0	1	0	hsa-miR-593-5p	-0.32	-0.32	N/A
C4orf40	ENST00000344526.5	chromosome 4 open reading frame 40	5	1	1	0	0	0	hsa-miR-593-5p	-0.32	-0.32	N/A
METAP1D	ENST00000315796.4	methionyl aminopeptidase type 1D (mitochondrial)	86	1	0	1	0	0	hsa-miR-593-5p	-0.32	-0.32	N/A
EPPIN	ENST00000555685.1	epididymal peptidase inhibitor	5	1	0	1	0	0	hsa-miR-593-5p	-0.32	-0.32	N/A
EPPIN-WFDC6	ENST00000504988.1	EPPIN-WFDC6 readthrough	5	1	0	1	0	0	hsa-miR-593-5p	-0.32	-0.32	N/A
PNMA3	ENST00000447306.1	paraneoplastic Ma antigen 3	5	2	0	0	2	1	hsa-miR-593-5p	-0.32	-0.32	N/A
CADM3	ENST00000368125.4	cell adhesion molecule 3	5	3	0	2	1	0	hsa-miR-593-5p	-0.32	-0.32	N/A
PTP4A1	ENST00000370651.3	protein tyrosine phosphatase type IVA, member 1	5740	2	0	0	2	0	hsa-miR-593-5p	-0.32	-0.5	N/A
GALNT13	ENST00000409237.1	UDP-N-acetyl-alpha-D-galactosamine:polypeptide N-acetylgalactosaminyltransferase 13 (GalNAc-T13)	49	1	0	1	0	0	hsa-miR-593-5p	-0.32	-0.32	N/A
FBXO36	ENST00000373652.3	F-box protein 36	5	2	0	0	2	0	hsa-miR-593-5p	-0.32	-0.32	N/A
GJB3	ENST00000373362.3	gap junction protein, beta 3, 31kDa	18	1	1	0	0	0	hsa-miR-593-5p	-0.32	-0.32	N/A
THSD7B	ENST00000409968.1	thrombospondin, type I, domain containing 7B	5	1	0	0	1	0	hsa-miR-593-5p	-0.32	-0.32	N/A
C16orf87	ENST00000394806.2	chromosome 16 open reading frame 87	95	1	0	1	0	0	hsa-miR-593-5p	-0.32	-0.36	N/A
PMF1	ENST00000368279.3	polyamine-modulated factor 1	96	1	0	1	0	0	hsa-miR-593-5p	-0.32	-0.32	N/A
PLXNA4	ENST00000321063.4	plexin A4	9	2	0	1	1	0	hsa-miR-593-5p	-0.32	-0.36	N/A
RIC3	ENST00000396677.2	RIC3 acetylcholine receptor chaperone	5	1	0	0	1	1	hsa-miR-593-5p	-0.32	-0.32	N/A
LDLRAP1	ENST00000374338.4	low density lipoprotein receptor adaptor protein 1	111	1	0	1	0	2	hsa-miR-593-5p	-0.32	-0.32	N/A
NUAK2	ENST00000367157.3	NUAK family, SNF1-like kinase, 2	213	2	0	2	0	0	hsa-miR-593-5p	-0.32	-0.32	N/A
ANKRD62	ENST00000314074.8	ankyrin repeat domain 62	5	2	1	0	1	0	hsa-miR-593-5p	-0.32	-0.32	N/A
TACR3	ENST00000304883.2	tachykinin receptor 3	5	1	1	0	0	0	hsa-miR-593-5p	-0.32	-0.32	N/A
EBF4	ENST00000380648.4	early B-cell factor 4	1194	3	0	1	2	0	hsa-miR-593-5p	-0.32	-0.45	N/A
STEAP3	ENST00000409811.1	STEAP family member 3, metalloreductase	160	2	0	1	1	2	hsa-miR-593-5p	-0.32	-0.33	N/A
C8orf31	ENST00000395172.1	chromosome 8 open reading frame 31	8	1	1	0	0	1	hsa-miR-593-5p	-0.32	-0.57	N/A
CSHL1	ENST00000561003.1	chorionic somatomammotropin hormone-like 1	5	1	0	0	1	0	hsa-miR-593-5p	-0.32	-0.32	N/A
CHMP1A	ENST00000397901.3	charged multivesicular body protein 1A	642	1	0	0	1	2	hsa-miR-593-5p	-0.32	-0.32	N/A
NMNAT1	ENST00000377205.1	nicotinamide nucleotide adenylyltransferase 1	72	2	0	1	1	0	hsa-miR-593-5p	-0.31	-0.38	N/A
DKK3	ENST00000396505.2	dickkopf WNT signaling pathway inhibitor 3	5725	5	1	1	3	0	hsa-miR-593-5p	-0.31	-0.86	N/A
RBM33	ENST00000341148.3	RNA binding motif protein 33	444	1	1	0	0	1	hsa-miR-593-5p	-0.31	-0.34	N/A
CTRC	ENST00000375943.2	chymotrypsin C (caldecrin)	5	1	1	0	0	1	hsa-miR-593-5p	-0.31	-0.31	N/A
TET2	ENST00000545826.1	tet methylcytosine dioxygenase 2	558	2	1	1	0	0	hsa-miR-593-5p	-0.31	-0.31	N/A
LRRC3	ENST00000291592.4	leucine rich repeat containing 3	176	2	1	0	1	2	hsa-miR-593-5p	-0.31	-0.33	N/A
KIAA1217	ENST00000396445.1	KIAA1217	320	3	0	1	2	0	hsa-miR-593-5p	-0.31	-0.48	N/A
MTR	ENST00000366577.5	5-methyltetrahydrofolate-homocysteine methyltransferase	378	2	2	0	0	2	hsa-miR-593-5p	-0.31	-0.35	N/A
EXOC3	ENST00000512944.1	exocyst complex component 3	463	1	0	0	1	5	hsa-miR-593-5p	-0.31	-0.43	N/A
SSNA1	ENST00000322310.5	Sjogren syndrome nuclear autoantigen 1	160	1	0	0	1	1	hsa-miR-593-5p	-0.31	-0.31	N/A
RDH5	ENST00000257895.5	retinol dehydrogenase 5 (11-cis/9-cis)	239	1	0	1	0	0	hsa-miR-593-5p	-0.31	-0.31	N/A
PANX2	ENST00000159647.5	pannexin 2	169	1	1	0	0	1	hsa-miR-593-5p	-0.31	-0.31	N/A
DHCR24	ENST00000371269.3	24-dehydrocholesterol reductase	7645	2	0	1	1	0	hsa-miR-593-5p	-0.31	-0.31	N/A
GDAP1	ENST00000220822.7	ganglioside induced differentiation associated protein 1	37	1	0	1	0	1	hsa-miR-593-5p	-0.31	-0.31	N/A
LRRC37A3	ENST00000339474.5	leucine rich repeat containing 37, member A3	5	1	0	1	0	0	hsa-miR-593-5p	-0.31	-0.31	N/A
PPM1D	ENST00000305921.3	protein phosphatase, Mg2+/Mn2+ dependent, 1D	896	1	0	1	0	0	hsa-miR-593-5p	-0.31	-0.31	N/A
ST8SIA1	ENST00000404299.3	ST8 alpha-N-acetyl-neuraminide alpha-2,8-sialyltransferase 1	5	1	0	0	1	0	hsa-miR-593-5p	-0.31	-0.31	N/A
RTEL1	ENST00000370018.3	regulator of telomere elongation helicase 1	325	1	1	0	0	0	hsa-miR-593-5p	-0.31	-0.31	N/A
NEUROD4	ENST00000242994.3	neuronal differentiation 4	5	1	1	0	0	0	hsa-miR-593-5p	-0.31	-0.31	N/A
FOXO3	ENST00000343882.6	forkhead box O3	32	2	1	0	1	0	hsa-miR-593-5p	-0.31	-0.31	N/A
ZNF512B	ENST00000369888.1	zinc finger protein 512B	8	2	1	1	0	2	hsa-miR-593-5p	-0.31	-0.31	N/A
SMR3B	ENST00000304915.3	submaxillary gland androgen regulated protein 3B	5	1	0	0	1	0	hsa-miR-593-5p	-0.31	-0.31	N/A
CRBN	ENST00000231948.4	cereblon	249	1	1	0	0	0	hsa-miR-593-5p	-0.31	-0.44	N/A
CLN6	ENST00000249806.5	ceroid-lipofuscinosis, neuronal 6, late infantile, variant	2624	2	0	1	1	0	hsa-miR-593-5p	-0.31	-0.31	N/A
ICAM1	ENST00000264832.3	intercellular adhesion molecule 1	861	1	1	0	0	0	hsa-miR-593-5p	-0.31	-0.31	N/A
NXF1	ENST00000531709.2	nuclear RNA export factor 1	1017	1	1	0	0	2	hsa-miR-593-5p	-0.31	-0.31	N/A
SYNDIG1L	ENST00000331628.3	synapse differentiation inducing 1-like	7	1	1	0	0	1	hsa-miR-593-5p	-0.31	-0.31	N/A
RAB25	ENST00000361084.5	RAB25, member RAS oncogene family	5	1	0	1	0	0	hsa-miR-593-5p	-0.31	-0.31	N/A
RP11-67H2.1	ENST00000521500.2	Uncharacterized protein	5	1	0	0	1	0	hsa-miR-593-5p	-0.31	-0.31	N/A
SLC25A45	ENST00000527174.1	solute carrier family 25, member 45	67	1	1	0	0	3	hsa-miR-593-5p	-0.31	-0.36	N/A
TRAPPC9	ENST00000389328.4	trafficking protein particle complex 9	251	1	0	1	0	2	hsa-miR-593-5p	-0.31	-0.36	N/A
ARHGEF12	ENST00000397843.2	Rho guanine nucleotide exchange factor (GEF) 12	815	3	1	1	1	1	hsa-miR-593-5p	-0.31	-0.34	N/A
FAM13B	ENST00000033079.3	family with sequence similarity 13, member B	220	1	1	0	0	0	hsa-miR-593-5p	-0.31	-0.32	N/A
CBY1	ENST00000216029.3	chibby homolog 1 (Drosophila)	27	1	0	0	1	0	hsa-miR-593-5p	-0.31	-0.31	N/A
REPIN1	ENST00000479668.1	replication initiator 1	2836	3	0	1	2	1	hsa-miR-593-5p	-0.31	-0.31	N/A
ABHD15	ENST00000307201.4	abhydrolase domain containing 15	240	2	0	2	0	1	hsa-miR-593-5p	-0.31	-0.51	N/A
NKPD1	ENST00000317951.4	NTPase, KAP family P-loop domain containing 1	10	2	1	0	1	1	hsa-miR-593-5p	-0.31	-0.38	N/A
COQ9	ENST00000262507.6	coenzyme Q9 homolog (S. cerevisiae)	1097	1	0	0	1	0	hsa-miR-593-5p	-0.31	-0.31	N/A
RBM38	ENST00000356208.5	RNA binding motif protein 38	18	2	1	0	1	0	hsa-miR-593-5p	-0.31	-0.43	N/A
NIPAL2	ENST00000341166.3	NIPA-like domain containing 2	7	1	0	1	0	1	hsa-miR-593-5p	-0.31	-0.31	N/A
PPCDC	ENST00000342932.3	phosphopantothenoylcysteine decarboxylase	26	1	0	0	1	2	hsa-miR-593-5p	-0.31	-0.35	N/A
DGKH	ENST00000261491.5	diacylglycerol kinase, eta	46	1	0	0	1	2	hsa-miR-593-5p	-0.31	-0.51	N/A
ZNF749	ENST00000334181.4	zinc finger protein 749	69	1	1	0	0	4	hsa-miR-593-5p	-0.3	-0.33	N/A
JPH2	ENST00000372980.3	junctophilin 2	76	2	1	0	1	1	hsa-miR-593-5p	-0.3	-0.34	N/A
HP1BP3	ENST00000312239.5	heterochromatin protein 1, binding protein 3	1886	1	0	1	0	1	hsa-miR-593-5p	-0.3	-0.33	N/A
FNDC5	ENST00000496770.1	fibronectin type III domain containing 5	5	2	0	0	2	0	hsa-miR-593-5p	-0.3	-0.44	N/A
SLC43A1	ENST00000278426.3	solute carrier family 43 (amino acid system L transporter), member 1	483	1	0	0	1	1	hsa-miR-593-5p	-0.3	-0.33	N/A
TXNL4B	ENST00000268483.3	thioredoxin-like 4B	200	1	0	0	1	2	hsa-miR-593-5p	-0.3	-0.32	N/A
PIWIL1	ENST00000245255.3	piwi-like RNA-mediated gene silencing 1	5	1	1	0	0	0	hsa-miR-593-5p	-0.3	-0.3	N/A
AOAH	ENST00000538464.1	acyloxyacyl hydrolase (neutrophil)	5	1	0	0	1	0	hsa-miR-593-5p	-0.3	-0.3	N/A
ZNF70	ENST00000341976.3	zinc finger protein 70	99	3	2	1	0	2	hsa-miR-593-5p	-0.3	-0.33	N/A
NPY4R	ENST00000374312.1	neuropeptide Y receptor Y4	10	3	2	0	1	1	hsa-miR-593-5p	-0.3	-0.65	N/A
AP1AR	ENST00000274000.5	adaptor-related protein complex 1 associated regulatory protein	89	2	0	1	1	0	hsa-miR-593-5p	-0.3	-0.33	N/A
CASS4	ENST00000371336.3	Cas scaffolding protein family member 4	49	2	0	1	1	0	hsa-miR-593-5p	-0.3	-0.32	N/A
ZNF618	ENST00000288466.7	zinc finger protein 618	778	4	0	3	1	1	hsa-miR-593-5p	-0.3	-0.31	N/A
TREML4	ENST00000341495.2	triggering receptor expressed on myeloid cells-like 4	5	1	0	0	1	0	hsa-miR-593-5p	-0.3	-0.3	N/A
NXN	ENST00000575801.1	nucleoredoxin	811	1	0	1	0	1	hsa-miR-593-5p	-0.3	-0.3	N/A
HDAC7	ENST00000380610.4	histone deacetylase 7	56	1	1	0	0	0	hsa-miR-593-5p	-0.3	-0.34	N/A
CYP2B6	ENST00000324071.4	cytochrome P450, family 2, subfamily B, polypeptide 6	5	1	1	0	0	1	hsa-miR-593-5p	-0.3	-0.35	N/A
PATE4	ENST00000457514.2	prostate and testis expressed 4	5	1	0	1	0	0	hsa-miR-593-5p	-0.3	-0.3	N/A
XIAP	ENST00000371199.3	X-linked inhibitor of apoptosis	153	2	1	0	1	1	hsa-miR-593-5p	-0.3	-0.5	N/A
RARRES2	ENST00000223271.3	retinoic acid receptor responder (tazarotene induced) 2	345	1	0	1	0	0	hsa-miR-593-5p	-0.3	-0.3	N/A
TTC26	ENST00000430935.1	tetratricopeptide repeat domain 26	211	1	0	1	0	0	hsa-miR-593-5p	-0.3	-0.3	N/A
DHX35	ENST00000252011.3	DEAH (Asp-Glu-Ala-His) box polypeptide 35	58	1	1	0	0	0	hsa-miR-593-5p	-0.3	-0.3	N/A
HDAC1	ENST00000373548.3	histone deacetylase 1	83	1	0	0	1	1	hsa-miR-593-5p	-0.3	-0.34	N/A
LRRC31	ENST00000316428.5	leucine rich repeat containing 31	5	1	0	1	0	0	hsa-miR-593-5p	-0.3	-0.3	N/A
SMIM3	ENST00000526627.1	small integral membrane protein 3	3180	1	0	0	1	0	hsa-miR-593-5p	-0.3	-0.3	N/A
KDELR3	ENST00000216014.4	KDEL (Lys-Asp-Glu-Leu) endoplasmic reticulum protein retention receptor 3	329	1	0	1	0	0	hsa-miR-593-5p	-0.3	-0.32	N/A
SEPT2	ENST00000391971.2	septin 2	1445	2	0	1	1	0	hsa-miR-593-5p	-0.3	-0.36	N/A
HPR	ENST00000561690.1	haptoglobin-related protein	5	1	0	0	1	0	hsa-miR-593-5p	-0.3	-0.3	N/A
YES1	ENST00000577961.1	v-yes-1 Yamaguchi sarcoma viral oncogene homolog 1	168	1	0	0	1	1	hsa-miR-593-5p	-0.3	-0.31	N/A
CLNS1A	ENST00000525428.1	chloride channel, nucleotide-sensitive, 1A	553	1	0	1	0	0	hsa-miR-593-5p	-0.3	-0.3	N/A
WDR38	ENST00000373574.1	WD repeat domain 38	5	1	0	1	0	0	hsa-miR-593-5p	-0.3	-0.3	N/A
PPAT	ENST00000264220.2	phosphoribosyl pyrophosphate amidotransferase	61	1	0	1	0	0	hsa-miR-593-5p	-0.3	-0.3	N/A
RARG	ENST00000425354.2	retinoic acid receptor, gamma	21	1	0	1	0	1	hsa-miR-593-5p	-0.3	-0.3	N/A
BCL9L	ENST00000334801.3	B-cell CLL/lymphoma 9-like	91	2	1	0	1	1	hsa-miR-593-5p	-0.3	-0.39	N/A
TRAF1	ENST00000373887.3	TNF receptor-associated factor 1	5	4	2	0	2	1	hsa-miR-593-5p	-0.3	-0.51	N/A
MFAP2	ENST00000375534.3	microfibrillar-associated protein 2	10	2	0	0	2	2	hsa-miR-593-5p	-0.3	-0.56	N/A
CTDSP2	ENST00000398073.2	CTD (carboxy-terminal domain, RNA polymerase II, polypeptide A) small phosphatase 2	991	1	1	0	0	2	hsa-miR-593-5p	-0.3	-0.33	N/A
SNN	ENST00000329565.5	stannin	663	1	1	0	0	1	hsa-miR-593-5p	-0.3	-0.32	N/A
DDO	ENST00000368924.3	D-aspartate oxidase	5	1	0	0	1	0	hsa-miR-593-5p	-0.3	-0.3	N/A
ARHGAP19-SLIT1	ENST00000453547.2	ARHGAP19-SLIT1 readthrough (NMD candidate)	15	4	3	1	0	2	hsa-miR-593-5p	-0.3	-0.3	N/A
PAM	ENST00000438793.3	peptidylglycine alpha-amidating monooxygenase	17149	1	0	1	0	0	hsa-miR-593-5p	-0.3	-0.3	N/A
BARX2	ENST00000281437.4	BARX homeobox 2	5	1	0	0	1	0	hsa-miR-593-5p	-0.3	-0.3	N/A
ATP2A3	ENST00000309890.7	ATPase, Ca++ transporting, ubiquitous	40	3	0	3	0	0	hsa-miR-593-5p	-0.3	-0.3	N/A
NFYA	ENST00000341376.6	nuclear transcription factor Y, alpha	177	1	1	0	0	2	hsa-miR-593-5p	-0.3	-0.48	N/A
CNP	ENST00000393892.3	2',3'-cyclic nucleotide 3' phosphodiesterase	399	1	0	1	0	3	hsa-miR-593-5p	-0.3	-0.36	N/A
SERTAD4	ENST00000367012.3	SERTA domain containing 4	296	1	0	1	0	0	hsa-miR-593-5p	-0.29	-0.29	N/A
PRKCH	ENST00000332981.5	protein kinase C, eta	400	1	0	0	1	1	hsa-miR-593-5p	-0.29	-0.29	N/A
PKP1	ENST00000367324.3	plakophilin 1 (ectodermal dysplasia/skin fragility syndrome)	12	2	1	1	0	0	hsa-miR-593-5p	-0.29	-0.29	N/A
EOMES	ENST00000295743.4	eomesodermin	28	1	0	0	1	1	hsa-miR-593-5p	-0.29	-0.29	N/A
AC104472.1	ENST00000399242.2	CDNA FLJ26134 fis, clone TMS03713; Uncharacterized protein	5	1	0	0	1	0	hsa-miR-593-5p	-0.29	-0.29	N/A
ANKS6	ENST00000375018.1	ankyrin repeat and sterile alpha motif domain containing 6	98	3	0	0	3	1	hsa-miR-593-5p	-0.29	-0.51	N/A
NHLRC3	ENST00000470258.1	NHL repeat containing 3	49	1	1	0	0	0	hsa-miR-593-5p	-0.29	-0.43	N/A
TMPPE	ENST00000416695.2	transmembrane protein with metallophosphoesterase domain	22	1	1	0	0	1	hsa-miR-593-5p	-0.29	-0.29	N/A
COMT	ENST00000361682.6	catechol-O-methyltransferase	323	1	0	0	1	0	hsa-miR-593-5p	-0.29	-0.29	N/A
HLF	ENST00000226067.5	hepatic leukemia factor	15	1	0	0	1	1	hsa-miR-593-5p	-0.29	-0.31	N/A
NUDCD3	ENST00000355451.7	NudC domain containing 3	659	3	0	1	2	3	hsa-miR-593-5p	-0.29	-0.31	N/A
DOPEY1	ENST00000349129.2	dopey family member 1	17	1	0	1	0	0	hsa-miR-593-5p	-0.29	-0.34	N/A
TEPP	ENST00000290871.5	testis, prostate and placenta expressed	5	1	0	0	1	1	hsa-miR-593-5p	-0.29	-0.4	N/A
NOL12	ENST00000359114.4	nucleolar protein 12	536	2	0	1	1	1	hsa-miR-593-5p	-0.29	-0.38	N/A
EFNA3	ENST00000368408.3	ephrin-A3	9	2	0	1	1	0	hsa-miR-593-5p	-0.29	-0.29	N/A
FAM27E2	ENST00000377529.1	family with sequence similarity 27, member E2	5	1	0	0	1	0	hsa-miR-593-5p	-0.29	-0.29	N/A
DNTT	ENST00000371174.2	DNA nucleotidylexotransferase	5	1	0	0	1	0	hsa-miR-593-5p	-0.29	-0.29	N/A
PLEKHF2	ENST00000315367.3	pleckstrin homology domain containing, family F (with FYVE domain) member 2	286	1	0	1	0	0	hsa-miR-593-5p	-0.29	-0.29	N/A
ATF2	ENST00000487334.2	activating transcription factor 2	123	1	0	0	1	0	hsa-miR-593-5p	-0.29	-0.29	N/A
ZCCHC3	ENST00000382352.3	zinc finger, CCHC domain containing 3	1328	1	1	0	0	1	hsa-miR-593-5p	-0.29	-0.29	N/A
PLA2G2C	ENST00000429261.2	phospholipase A2, group IIC	5	1	0	0	1	1	hsa-miR-593-5p	-0.29	-0.29	N/A
ZNF771	ENST00000564550.1	zinc finger protein 771	125	1	0	0	1	0	hsa-miR-593-5p	-0.29	-0.29	N/A
WDR55	ENST00000358337.5	WD repeat domain 55	251	2	0	0	2	1	hsa-miR-593-5p	-0.29	-0.31	N/A
FDX1L	ENST00000541276.1	ferredoxin 1-like	198	1	0	0	1	1	hsa-miR-593-5p	-0.29	-0.35	N/A
ZNF280B	ENST00000360412.2	zinc finger protein 280B	7	2	1	1	0	1	hsa-miR-593-5p	-0.29	-0.39	N/A
SUFU	ENST00000369902.3	suppressor of fused homolog (Drosophila)	247	4	0	2	2	3	hsa-miR-593-5p	-0.29	-0.44	N/A
KIF24	ENST00000402558.2	kinesin family member 24	84	1	0	0	1	1	hsa-miR-593-5p	-0.29	-0.29	N/A
UROC1	ENST00000290868.2	urocanate hydratase 1	5	2	0	1	1	0	hsa-miR-593-5p	-0.29	-0.29	N/A
RALB	ENST00000272519.5	v-ral simian leukemia viral oncogene homolog B	527	1	0	0	1	0	hsa-miR-593-5p	-0.29	-0.29	N/A
LMOD3	ENST00000420581.2	leiomodin 3 (fetal)	5	1	0	1	0	0	hsa-miR-593-5p	-0.29	-0.29	N/A
TTC7A	ENST00000319190.5	tetratricopeptide repeat domain 7A	400	2	0	2	0	1	hsa-miR-593-5p	-0.29	-0.32	N/A
AHRR	ENST00000316418.5	aryl-hydrocarbon receptor repressor	1049	1	0	0	1	1	hsa-miR-593-5p	-0.29	-0.35	N/A
BMF	ENST00000220446.4	Bcl2 modifying factor	179	1	0	0	1	3	hsa-miR-593-5p	-0.29	-0.38	N/A
MAML3	ENST00000509479.2	mastermind-like 3 (Drosophila)	159	2	0	1	1	2	hsa-miR-593-5p	-0.29	-0.29	N/A
GNB3	ENST00000229264.3	guanine nucleotide binding protein (G protein), beta polypeptide 3	49	1	0	0	1	0	hsa-miR-593-5p	-0.29	-0.29	N/A
KCNAB2	ENST00000378097.1	potassium voltage-gated channel, shaker-related subfamily, beta member 2	67	3	1	1	1	0	hsa-miR-593-5p	-0.29	-0.29	N/A
GOLGA7	ENST00000405786.2	golgin A7	34	1	0	0	1	0	hsa-miR-593-5p	-0.29	-0.29	N/A
KIF18B	ENST00000587309.1	kinesin family member 18B	172	1	0	1	0	0	hsa-miR-593-5p	-0.29	-0.29	N/A
TMEM181	ENST00000367090.3	transmembrane protein 181	924	1	1	0	0	0	hsa-miR-593-5p	-0.29	-0.29	N/A
ZBTB37	ENST00000367701.5	zinc finger and BTB domain containing 37	213	2	0	1	1	0	hsa-miR-593-5p	-0.29	-0.31	N/A
VHL	ENST00000256474.2	von Hippel-Lindau tumor suppressor, E3 ubiquitin protein ligase	2386	1	1	0	0	0	hsa-miR-593-5p	-0.29	-0.3	N/A
TLR9	ENST00000360658.2	toll-like receptor 9	5	1	0	0	1	0	hsa-miR-593-5p	-0.29	-0.29	N/A
ALDH4A1	ENST00000375341.3	aldehyde dehydrogenase 4 family, member A1	520	2	1	1	0	1	hsa-miR-593-5p	-0.29	-0.29	N/A
EIF1AY	ENST00000361365.2	eukaryotic translation initiation factor 1A, Y-linked	5	1	0	0	1	0	hsa-miR-593-5p	-0.29	-0.29	N/A
HP	ENST00000570083.1	haptoglobin	5	1	0	0	1	0	hsa-miR-593-5p	-0.29	-0.29	N/A
COL4A2	ENST00000360467.5	collagen, type IV, alpha 2	879	1	0	0	1	0	hsa-miR-593-5p	-0.29	-0.29	N/A
TAL1	ENST00000371884.2	T-cell acute lymphocytic leukemia 1	5	1	1	0	0	1	hsa-miR-593-5p	-0.29	-0.29	N/A
MAGEC3	ENST00000448920.1	melanoma antigen family C, 3	5	1	0	0	1	0	hsa-miR-593-5p	-0.29	-0.29	N/A
MRPL35	ENST00000337109.4	mitochondrial ribosomal protein L35	860	1	0	1	0	0	hsa-miR-593-5p	-0.29	-0.3	N/A
MYH7	ENST00000355349.3	myosin, heavy chain 7, cardiac muscle, beta	5	1	0	0	1	0	hsa-miR-593-5p	-0.29	-0.29	N/A
OLR1	ENST00000543993.1	oxidized low density lipoprotein (lectin-like) receptor 1	15	1	0	0	1	1	hsa-miR-593-5p	-0.29	-0.31	N/A
HECA	ENST00000367658.2	headcase homolog (Drosophila)	783	1	1	0	0	0	hsa-miR-593-5p	-0.29	-0.29	N/A
THUMPD1	ENST00000381337.2	THUMP domain containing 1	39	2	0	2	0	0	hsa-miR-593-5p	-0.28	-0.28	N/A
AFAP1	ENST00000360265.4	actin filament associated protein 1	1966	1	0	0	1	3	hsa-miR-593-5p	-0.28	-0.3	N/A
PPM1L	ENST00000498165.1	protein phosphatase, Mg2+/Mn2+ dependent, 1L	59	2	1	0	1	2	hsa-miR-593-5p	-0.28	-0.37	N/A
SFT2D3	ENST00000310981.4	SFT2 domain containing 3	313	1	0	1	0	0	hsa-miR-593-5p	-0.28	-0.38	N/A
GADL1	ENST00000454381.3	glutamate decarboxylase-like 1	5	2	0	1	1	0	hsa-miR-593-5p	-0.28	-0.28	N/A
POLH	ENST00000372226.1	polymerase (DNA directed), eta	450	1	0	0	1	0	hsa-miR-593-5p	-0.28	-0.28	N/A
TLR9	ENST00000494383.1	TLR9	5	1	0	0	1	0	hsa-miR-593-5p	-0.28	-0.28	N/A
GARNL3	ENST00000373387.4	GTPase activating Rap/RanGAP domain-like 3	117	1	0	0	1	0	hsa-miR-593-5p	-0.28	-0.28	N/A
C1orf95	ENST00000366788.3	chromosome 1 open reading frame 95	28	2	1	1	0	2	hsa-miR-593-5p	-0.28	-0.57	N/A
PPP4R1L	ENST00000334187.8	protein phosphatase 4, regulatory subunit 1-like	27	2	0	1	1	0	hsa-miR-593-5p	-0.28	-0.35	N/A
SDK1	ENST00000404826.2	sidekick cell adhesion molecule 1	60	2	0	1	1	2	hsa-miR-593-5p	-0.28	-0.34	N/A
SLMO2	ENST00000355937.4	slowmo homolog 2 (Drosophila)	374	1	1	0	0	0	hsa-miR-593-5p	-0.28	-0.34	N/A
PDE3A	ENST00000359062.3	phosphodiesterase 3A, cGMP-inhibited	1182	2	1	0	1	0	hsa-miR-593-5p	-0.28	-0.36	N/A
FOXF2	ENST00000259806.1	forkhead box F2	2955	1	0	0	1	0	hsa-miR-593-5p	-0.28	-0.28	N/A
ROBO2	ENST00000461745.1	roundabout, axon guidance receptor, homolog 2 (Drosophila)	22	3	2	1	0	0	hsa-miR-593-5p	-0.28	-0.48	N/A
EPT1	ENST00000260585.7	ethanolaminephosphotransferase 1 (CDP-ethanolamine-specific)	449	2	0	1	1	1	hsa-miR-593-5p	-0.28	-0.31	N/A
OLIG3	ENST00000367734.2	oligodendrocyte transcription factor 3	5	1	0	1	0	2	hsa-miR-593-5p	-0.28	-0.28	N/A
TOR3A	ENST00000367627.3	torsin family 3, member A	217	1	0	1	0	0	hsa-miR-593-5p	-0.28	-0.28	N/A
SLC39A14	ENST00000381237.1	solute carrier family 39 (zinc transporter), member 14	2413	2	0	1	1	0	hsa-miR-593-5p	-0.28	-0.28	N/A
TM7SF3	ENST00000343028.4	transmembrane 7 superfamily member 3	35	1	0	1	0	1	hsa-miR-593-5p	-0.28	-0.31	N/A
POLR3H	ENST00000396504.2	polymerase (RNA) III (DNA directed) polypeptide H (22.9kD)	216	1	0	0	1	2	hsa-miR-593-5p	-0.28	-0.29	N/A
EPHX4	ENST00000370383.4	epoxide hydrolase 4	55	1	0	1	0	0	hsa-miR-593-5p	-0.28	-0.42	N/A
SERPINB10	ENST00000238508.3	serpin peptidase inhibitor, clade B (ovalbumin), member 10	5	1	0	1	0	0	hsa-miR-593-5p	-0.28	-0.28	N/A
KLF13	ENST00000307145.3	Kruppel-like factor 13	5	2	0	1	1	3	hsa-miR-593-5p	-0.28	-0.28	N/A
AP001652.1	ENST00000454512.1	Uncharacterized protein; cDNA FLJ60524	5	1	0	0	1	0	hsa-miR-593-5p	-0.28	-0.28	N/A
EFNA4	ENST00000368409.3	ephrin-A4	125	1	0	0	1	0	hsa-miR-593-5p	-0.28	-0.28	N/A
PLEKHF1	ENST00000436066.3	pleckstrin homology domain containing, family F (with FYVE domain) member 1	50	2	0	1	1	0	hsa-miR-593-5p	-0.28	-0.28	N/A
DENND1C	ENST00000381480.2	DENN/MADD domain containing 1C	5	1	0	1	0	0	hsa-miR-593-5p	-0.28	-0.28	N/A
AC008443.1	ENST00000599439.1	CDNA: FLJ23158 fis, clone LNG09623; Uncharacterized protein	109	1	0	1	0	0	hsa-miR-593-5p	-0.28	-0.28	N/A
FUT8	ENST00000360689.5	fucosyltransferase 8 (alpha (1,6) fucosyltransferase)	64	1	0	1	0	0	hsa-miR-593-5p	-0.28	-0.28	N/A
HAUS2	ENST00000260372.3	HAUS augmin-like complex, subunit 2	270	1	1	0	0	0	hsa-miR-593-5p	-0.28	-0.31	N/A
TNFAIP1	ENST00000226225.2	tumor necrosis factor, alpha-induced protein 1 (endothelial)	1565	1	0	0	1	1	hsa-miR-593-5p	-0.28	-0.3	N/A
PAX5	ENST00000358127.4	paired box 5	5	3	0	0	3	0	hsa-miR-593-5p	-0.28	-0.28	N/A
ARHGAP19	ENST00000358531.4	Rho GTPase activating protein 19	1051	1	1	0	0	0	hsa-miR-593-5p	-0.28	-0.28	N/A
SPRED3	ENST00000587013.1	sprouty-related, EVH1 domain containing 3	42	3	0	1	2	2	hsa-miR-593-5p	-0.28	-0.32	N/A
RNF152	ENST00000312828.3	ring finger protein 152	57	2	0	1	1	0	hsa-miR-593-5p	-0.28	-0.33	N/A
C10orf54	ENST00000394957.3	chromosome 10 open reading frame 54	78	1	0	0	1	0	hsa-miR-593-5p	-0.28	-0.28	N/A
KRT78	ENST00000359499.4	keratin 78	5	1	0	0	1	2	hsa-miR-593-5p	-0.28	-0.28	N/A
ALG1L	ENST00000340333.3	ALG1, chitobiosyldiphosphodolichol beta-mannosyltransferase-like	5	1	0	1	0	0	hsa-miR-593-5p	-0.28	-0.28	N/A
GPR133	ENST00000376682.4	G protein-coupled receptor 133	57	4	1	3	0	0	hsa-miR-593-5p	-0.28	-0.37	N/A
ZNF420	ENST00000337995.3	zinc finger protein 420	67	1	0	1	0	0	hsa-miR-593-5p	-0.28	-0.28	N/A
ZNF812	ENST00000457674.2	zinc finger protein 812	5	1	0	0	1	0	hsa-miR-593-5p	-0.28	-0.28	N/A
MST4	ENST00000394334.2	Serine/threonine-protein kinase MST4	47	1	0	1	0	0	hsa-miR-593-5p	-0.28	-0.34	N/A
IGSF3	ENST00000369486.3	immunoglobulin superfamily, member 3	141	3	0	2	1	0	hsa-miR-593-5p	-0.28	-0.33	N/A
VWA2	ENST00000392982.3	von Willebrand factor A domain containing 2	5	2	0	1	1	1	hsa-miR-593-5p	-0.28	-0.43	N/A
POLA2	ENST00000265465.3	polymerase (DNA directed), alpha 2, accessory subunit	2627	3	0	1	2	2	hsa-miR-593-5p	-0.28	-0.46	N/A
DNAJC5G	ENST00000296097.3	DnaJ (Hsp40) homolog, subfamily C, member 5 gamma	5	1	0	1	0	1	hsa-miR-593-5p	-0.28	-0.28	N/A
ARHGAP36	ENST00000370922.1	Rho GTPase activating protein 36	5	1	0	0	1	0	hsa-miR-593-5p	-0.28	-0.28	N/A
SOCS2	ENST00000548537.1	suppressor of cytokine signaling 2	89	1	0	0	1	1	hsa-miR-593-5p	-0.28	-0.28	N/A
TMEM214	ENST00000238788.9	transmembrane protein 214	1344	1	0	1	0	0	hsa-miR-593-5p	-0.28	-0.28	N/A
C11orf44	ENST00000317019.2	chromosome 11 open reading frame 44	5	1	0	1	0	0	hsa-miR-593-5p	-0.28	-0.28	N/A
C15orf56	ENST00000319503.3	chromosome 15 open reading frame 56	5	1	1	0	0	0	hsa-miR-593-5p	-0.27	-0.27	N/A
PEMT	ENST00000435340.2	phosphatidylethanolamine N-methyltransferase	1314	1	0	1	0	0	hsa-miR-593-5p	-0.27	-0.27	N/A
DEF6	ENST00000316637.5	differentially expressed in FDCP 6 homolog (mouse)	35	1	1	0	0	0	hsa-miR-593-5p	-0.27	-0.27	N/A
PARP12	ENST00000263549.3	poly (ADP-ribose) polymerase family, member 12	16	1	1	0	0	0	hsa-miR-593-5p	-0.27	-0.33	N/A
DSC1	ENST00000257197.3	desmocollin 1	7	1	1	0	0	0	hsa-miR-593-5p	-0.27	-0.27	N/A
AQP2	ENST00000199280.3	aquaporin 2 (collecting duct)	5	1	0	0	1	2	hsa-miR-593-5p	-0.27	-0.27	N/A
JMJD7	ENST00000397299.4	jumonji domain containing 7	311	1	0	0	1	0	hsa-miR-593-5p	-0.27	-0.27	N/A
CEP97	ENST00000341893.3	centrosomal protein 97kDa	290	2	0	0	2	1	hsa-miR-593-5p	-0.27	-0.31	N/A
SLC39A10	ENST00000409086.3	solute carrier family 39 (zinc transporter), member 10	511	1	0	1	0	1	hsa-miR-593-5p	-0.27	-0.28	N/A
STK33	ENST00000447869.1	serine/threonine kinase 33	13	1	0	0	1	0	hsa-miR-593-5p	-0.27	-0.27	N/A
C7orf76	ENST00000356686.1	chromosome 7 open reading frame 76	5	1	0	1	0	0	hsa-miR-593-5p	-0.27	-0.27	N/A
FOSL1	ENST00000448083.2	FOS-like antigen 1	276	1	0	0	1	0	hsa-miR-593-5p	-0.27	-0.27	N/A
COL6A1	ENST00000361866.3	collagen, type VI, alpha 1	2518	1	1	0	0	0	hsa-miR-593-5p	-0.27	-0.28	N/A
RPUSD4	ENST00000298317.4	RNA pseudouridylate synthase domain containing 4	333	1	0	0	1	1	hsa-miR-593-5p	-0.27	-0.27	N/A
SPOCK3	ENST00000357154.3	sparc/osteonectin, cwcv and kazal-like domains proteoglycan (testican) 3	46	1	0	1	0	0	hsa-miR-593-5p	-0.27	-0.27	N/A
DCUN1D1	ENST00000292782.4	DCN1, defective in cullin neddylation 1, domain containing 1	267	1	0	1	0	0	hsa-miR-593-5p	-0.27	-0.27	N/A
ENPP1	ENST00000360971.2	ectonucleotide pyrophosphatase/phosphodiesterase 1	159	2	0	0	2	0	hsa-miR-593-5p	-0.27	-0.33	N/A
NAT16	ENST00000300303.2	N-acetyltransferase 16 (GCN5-related, putative)	5	1	1	0	0	0	hsa-miR-593-5p	-0.27	-0.27	N/A
RPS16	ENST00000599539.1	ribosomal protein S16	29858	1	0	1	0	0	hsa-miR-593-5p	-0.27	-0.27	N/A
FAM133A	ENST00000538690.1	family with sequence similarity 133, member A	14	1	0	1	0	0	hsa-miR-593-5p	-0.27	-0.27	N/A
ELP4	ENST00000395934.2	elongator acetyltransferase complex subunit 4	282	1	0	1	0	0	hsa-miR-593-5p	-0.27	-0.27	N/A
CCDC57	ENST00000389641.4	coiled-coil domain containing 57	53	1	0	1	0	0	hsa-miR-593-5p	-0.27	-0.27	N/A
TMEM163	ENST00000281924.6	transmembrane protein 163	24	1	0	0	1	0	hsa-miR-593-5p	-0.27	-0.27	N/A
SNX24	ENST00000513881.1	sorting nexin 24	352	1	0	0	1	0	hsa-miR-593-5p	-0.27	-0.27	N/A
REEP6	ENST00000233596.3	receptor accessory protein 6	822	2*	0	1	0	0	hsa-miR-593-5p	-0.27	-0.27	N/A
GRK1	ENST00000335678.6	G protein-coupled receptor kinase 1	5	3	1	1	1	1	hsa-miR-593-5p	-0.27	-0.27	N/A
SGPL1	ENST00000373202.3	sphingosine-1-phosphate lyase 1	105	2	1	1	0	0	hsa-miR-593-5p	-0.27	-0.34	N/A
C11orf21	ENST00000381153.3	chromosome 11 open reading frame 21	5	3	0	2	1	1	hsa-miR-593-5p	-0.27	-0.27	N/A
FTO	ENST00000471389.1	fat mass and obesity associated	240	2	1	1	0	3	hsa-miR-593-5p	-0.27	-0.3	N/A
POPDC2	ENST00000264231.3	popeye domain containing 2	7	1	0	0	1	0	hsa-miR-593-5p	-0.27	-0.27	N/A
AC010441.1	ENST00000600109.1		3180	1	0	0	1	0	hsa-miR-593-5p	-0.27	-0.27	N/A
CCDC152	ENST00000361970.5	coiled-coil domain containing 152	5	1	1	0	0	0	hsa-miR-593-5p	-0.27	-0.27	N/A
CTCFL	ENST00000608903.1	CCCTC-binding factor (zinc finger protein)-like	5	1	0	1	0	0	hsa-miR-593-5p	-0.27	-0.27	N/A
TSPO2	ENST00000373161.1	translocator protein 2	5	1	0	1	0	0	hsa-miR-593-5p	-0.27	-0.27	N/A
DHRSX	ENST00000334651.5	dehydrogenase/reductase (SDR family) X-linked	5	1	0	0	1	0	hsa-miR-593-5p	-0.27	-0.27	N/A
DOK7	ENST00000507039.1	docking protein 7	19	1	0	0	1	2	hsa-miR-593-5p	-0.27	-0.27	N/A
CAPN12	ENST00000601953.1	calpain 12	14	1	0	0	1	0	hsa-miR-593-5p	-0.27	-0.27	N/A
C1orf180	ENST00000370624.1	chromosome 1 open reading frame 180	5	1	1	0	0	0	hsa-miR-593-5p	-0.27	-0.27	N/A
IL16	ENST00000394660.2	interleukin 16	5	1	1	0	0	0	hsa-miR-593-5p	-0.27	-0.27	N/A
AC008964.1	ENST00000593965.1		5	1	0	0	1	0	hsa-miR-593-5p	-0.27	-0.27	N/A
SYNGR3	ENST00000248121.2	synaptogyrin 3	223	1	0	0	1	0	hsa-miR-593-5p	-0.27	-0.27	N/A
ZDHHC17	ENST00000426126.2	zinc finger, DHHC-type containing 17	117	1	0	1	0	0	hsa-miR-593-5p	-0.27	-0.27	N/A
R3HCC1	ENST00000265806.6	R3H domain and coiled-coil containing 1	112	1	1	0	0	1	hsa-miR-593-5p	-0.27	-0.42	N/A
TSPO	ENST00000337554.3	translocator protein (18kDa)	10516	1	0	0	1	0	hsa-miR-593-5p	-0.27	-0.27	N/A
TRIB3	ENST00000217233.3	tribbles pseudokinase 3	730	1	0	0	1	0	hsa-miR-593-5p	-0.26	-0.27	N/A
YDJC	ENST00000398873.3	YdjC homolog (bacterial)	494	1	0	1	0	0	hsa-miR-593-5p	-0.26	-0.27	N/A
DTNA	ENST00000283365.9	dystrobrevin, alpha	144	2	0	1	1	1	hsa-miR-593-5p	-0.26	-0.27	N/A
CDYL2	ENST00000570137.2	chromodomain protein, Y-like 2	239	1	1	0	0	1	hsa-miR-593-5p	-0.26	-0.36	N/A
MICA	ENST00000449934.2	MHC class I polypeptide-related sequence A	742	2	1	1	0	0	hsa-miR-593-5p	-0.26	-0.39	N/A
IL12RB1	ENST00000322153.7	interleukin 12 receptor, beta 1	5	1	0	1	0	0	hsa-miR-593-5p	-0.26	-0.26	N/A
PABPC5	ENST00000312600.3	poly(A) binding protein, cytoplasmic 5	5	1	0	1	0	0	hsa-miR-593-5p	-0.26	-0.26	N/A
CASP2	ENST00000310447.5	caspase 2, apoptosis-related cysteine peptidase	274	1	0	0	1	1	hsa-miR-593-5p	-0.26	-0.29	N/A
UGT1A4	ENST00000373409.3	UDP glucuronosyltransferase 1 family, polypeptide A4	5	1	0	0	1	0	hsa-miR-593-5p	-0.26	-0.26	N/A
UGT1A7	ENST00000373426.3	UDP glucuronosyltransferase 1 family, polypeptide A7	5	1	0	0	1	0	hsa-miR-593-5p	-0.26	-0.26	N/A
UGT1A6	ENST00000305139.6	UDP glucuronosyltransferase 1 family, polypeptide A6	5	1	0	0	1	0	hsa-miR-593-5p	-0.26	-0.26	N/A
UGT1A8	ENST00000305208.5	UDP glucuronosyltransferase 1 family, polypeptide A8	5	1	0	0	1	0	hsa-miR-593-5p	-0.26	-0.26	N/A
SYDE1	ENST00000342784.2	synapse defective 1, Rho GTPase, homolog 1 (C. elegans)	249	1	0	1	0	1	hsa-miR-593-5p	-0.26	-0.26	N/A
UGT1A3	ENST00000482026.1	UDP glucuronosyltransferase 1 family, polypeptide A3	5	1	0	0	1	0	hsa-miR-593-5p	-0.26	-0.26	N/A
UGT1A9	ENST00000354728.4	UDP glucuronosyltransferase 1 family, polypeptide A9	5	1	0	0	1	0	hsa-miR-593-5p	-0.26	-0.26	N/A
UGT1A5	ENST00000373414.3	UDP glucuronosyltransferase 1 family, polypeptide A5	5	1	0	0	1	0	hsa-miR-593-5p	-0.26	-0.26	N/A
MMD	ENST00000262065.3	monocyte to macrophage differentiation-associated	558	1	0	1	0	0	hsa-miR-593-5p	-0.26	-0.27	N/A
GPR26	ENST00000284674.1	G protein-coupled receptor 26	5	2	0	1	1	1	hsa-miR-593-5p	-0.26	-0.31	N/A
FUT5	ENST00000588525.1	fucosyltransferase 5 (alpha (1,3) fucosyltransferase)	5	1	0	1	0	1	hsa-miR-593-5p	-0.26	-0.26	N/A
TMEM236	ENST00000480516.1		5	1	1	0	0	0	hsa-miR-593-5p	-0.26	-0.26	N/A
SDK2	ENST00000392650.3	sidekick cell adhesion molecule 2	8	2	0	1	1	2	hsa-miR-593-5p	-0.26	-0.26	N/A
PEX26	ENST00000329627.7	peroxisomal biogenesis factor 26	157	2	0	2	0	5	hsa-miR-593-5p	-0.26	-0.51	N/A
IGSF9	ENST00000361509.3	immunoglobulin superfamily, member 9	5	1	0	1	0	0	hsa-miR-593-5p	-0.26	-0.26	N/A
UGT1A1	ENST00000373450.4	UDP glucuronosyltransferase 1 family, polypeptide A1	5	1	0	0	1	0	hsa-miR-593-5p	-0.26	-0.26	N/A
EGLN2	ENST00000593726.1	egl-9 family hypoxia-inducible factor 2	19	1	0	0	1	0	hsa-miR-593-5p	-0.26	-0.26	N/A
EFNB2	ENST00000245323.4	ephrin-B2	25	1	0	0	1	2	hsa-miR-593-5p	-0.26	-0.26	N/A
MARCKSL1	ENST00000329421.7	MARCKS-like 1	1382	1	0	1	0	0	hsa-miR-593-5p	-0.26	-0.26	N/A
SUCNR1	ENST00000362032.5	succinate receptor 1	5	1	0	1	0	0	hsa-miR-593-5p	-0.26	-0.26	N/A
UGT1A10	ENST00000344644.5	UDP glucuronosyltransferase 1 family, polypeptide A10	5	1	0	0	1	0	hsa-miR-593-5p	-0.26	-0.26	N/A
C9orf41	ENST00000376834.3	chromosome 9 open reading frame 41	248	1	0	1	0	0	hsa-miR-593-5p	-0.26	-0.26	N/A
FAM69B	ENST00000371692.4	family with sequence similarity 69, member B	1836	1	0	0	1	0	hsa-miR-593-5p	-0.26	-0.26	N/A
TMEM236	ENST00000377495.1	transmembrane protein 236	5	1	1	0	0	0	hsa-miR-593-5p	-0.26	-0.26	N/A
CAPN6	ENST00000324068.1	calpain 6	5	1	0	0	1	0	hsa-miR-593-5p	-0.26	-0.26	N/A
POLR3D	ENST00000397802.4	polymerase (RNA) III (DNA directed) polypeptide D, 44kDa	678	2	0	1	1	1	hsa-miR-593-5p	-0.26	-0.36	N/A
VWA5B2	ENST00000426955.2	von Willebrand factor A domain containing 5B2	14	1	1	0	0	0	hsa-miR-593-5p	-0.26	-0.26	N/A
FCF1	ENST00000341162.4	FCF1 rRNA-processing protein	119	1	0	1	0	1	hsa-miR-593-5p	-0.26	-0.33	N/A
FOXO1	ENST00000379561.5	forkhead box O1	480	1	1	0	0	0	hsa-miR-593-5p	-0.26	-0.27	N/A
ANKS3	ENST00000304283.4	ankyrin repeat and sterile alpha motif domain containing 3	6	1	0	0	1	0	hsa-miR-593-5p	-0.26	-0.26	N/A
DUSP13	ENST00000372702.3	dual specificity phosphatase 13	5	1	0	0	1	0	hsa-miR-593-5p	-0.26	-0.26	N/A
MRI1	ENST00000319545.8	methylthioribose-1-phosphate isomerase 1	851	1	1	0	0	0	hsa-miR-593-5p	-0.26	-0.26	N/A
SEZ6L	ENST00000360929.3	seizure related 6 homolog (mouse)-like	5	2	0	1	1	0	hsa-miR-593-5p	-0.26	-0.26	N/A
MYO5B	ENST00000285039.7	myosin VB	12	2	1	0	1	1	hsa-miR-593-5p	-0.26	-0.26	N/A
TCHHL1	ENST00000368806.1	trichohyalin-like 1	5	1	0	0	1	0	hsa-miR-593-5p	-0.26	-0.26	N/A
AC139100.2	ENST00000588226.1	Uncharacterized protein	55	1	0	0	1	0	hsa-miR-593-5p	-0.26	-0.26	N/A
ST8SIA2	ENST00000268164.3	ST8 alpha-N-acetyl-neuraminide alpha-2,8-sialyltransferase 2	9	1	0	0	1	2	hsa-miR-593-5p	-0.26	-0.26	N/A
ZNF202	ENST00000336139.4	zinc finger protein 202	704	1	0	0	1	0	hsa-miR-593-5p	-0.26	-0.26	N/A
ELL2	ENST00000237853.4	elongation factor, RNA polymerase II, 2	397	1	1	0	0	0	hsa-miR-593-5p	-0.26	-0.26	N/A
CCNG2	ENST00000316355.5	cyclin G2	1056	1	0	0	1	0	hsa-miR-593-5p	-0.26	-0.27	N/A
C17orf62	ENST00000342572.8	chromosome 17 open reading frame 62	89	1	0	1	0	0	hsa-miR-593-5p	-0.26	-0.26	N/A
AC137932.1	ENST00000602042.1		5	2*	0	0	1	1	hsa-miR-593-5p	-0.26	-0.26	N/A
LCK	ENST00000336890.5	lymphocyte-specific protein tyrosine kinase	23	1	0	1	0	0	hsa-miR-593-5p	-0.26	-0.26	N/A
DNAJC8	ENST00000263697.4	DnaJ (Hsp40) homolog, subfamily C, member 8	584	1	0	0	1	0	hsa-miR-593-5p	-0.26	-0.26	N/A
RELT	ENST00000064780.2	RELT tumor necrosis factor receptor	412	1	1	0	0	0	hsa-miR-593-5p	-0.26	-0.26	N/A
ELF3	ENST00000367284.5	E74-like factor 3 (ets domain transcription factor, epithelial-specific )	231	1	0	1	0	0	hsa-miR-593-5p	-0.26	-0.26	N/A
ZFAT	ENST00000429442.2	zinc finger and AT hook domain containing	120	1	0	0	1	0	hsa-miR-593-5p	-0.26	-0.26	N/A
CDK18	ENST00000360066.2	cyclin-dependent kinase 18	262	1	1	0	0	0	hsa-miR-593-5p	-0.26	-0.26	N/A
TAB1	ENST00000216160.6	TGF-beta activated kinase 1/MAP3K7 binding protein 1	577	3	1	1	1	1	hsa-miR-593-5p	-0.26	-0.35	N/A
ACSF2	ENST00000427954.2	acyl-CoA synthetase family member 2	1502	1	0	0	1	0	hsa-miR-593-5p	-0.26	-0.26	N/A
TMC3	ENST00000558726.1	transmembrane channel-like 3	5	1	1	0	0	0	hsa-miR-593-5p	-0.26	-0.26	N/A
CYP2S1	ENST00000310054.4	cytochrome P450, family 2, subfamily S, polypeptide 1	150	1	0	1	0	2	hsa-miR-593-5p	-0.26	-0.26	N/A
ATPIF1	ENST00000465645.1	ATPase inhibitory factor 1	15846	1	0	1	0	0	hsa-miR-593-5p	-0.26	-0.26	N/A
FXYD6-FXYD2	ENST00000532984.1	FXYD6-FXYD2 readthrough	35	1	0	0	1	0	hsa-miR-593-5p	-0.26	-0.26	N/A
MYO18A	ENST00000354329.4	myosin XVIIIA	159	2	0	2	0	0	hsa-miR-593-5p	-0.26	-0.36	N/A
TMEM201	ENST00000340305.5	transmembrane protein 201	164	2	0	0	2	2	hsa-miR-593-5p	-0.26	-0.3	N/A
ZNF92	ENST00000328747.7	zinc finger protein 92	99	1	0	1	0	0	hsa-miR-593-5p	-0.26	-0.26	N/A
URGCP	ENST00000223341.7	upregulator of cell proliferation	180	2	0	2	0	0	hsa-miR-593-5p	-0.26	-0.26	N/A
IGSF23	ENST00000402988.1	immunoglobulin superfamily, member 23	5	1	0	0	1	0	hsa-miR-593-5p	-0.26	-0.26	N/A
AC135983.2	ENST00000593303.1	Protein LOC100996413	5	1	0	1	0	0	hsa-miR-593-5p	-0.26	-0.26	N/A
ANKRD44	ENST00000282272.8	ankyrin repeat domain 44	187	1	1	0	0	0	hsa-miR-593-5p	-0.26	-0.27	N/A
TMED9	ENST00000332598.6	transmembrane emp24 protein transport domain containing 9	1751	1	0	1	0	0	hsa-miR-593-5p	-0.26	-0.26	N/A
C9orf69	ENST00000561457.1	chromosome 9 open reading frame 69	134	2	0	2	0	1	hsa-miR-593-5p	-0.26	-0.26	N/A
APOBR	ENST00000564831.1	apolipoprotein B receptor	5	1	0	0	1	1	hsa-miR-593-5p	-0.26	-0.26	N/A
FAHD2A	ENST00000233379.4	fumarylacetoacetate hydrolase domain containing 2A	9	2	0	1	1	1	hsa-miR-593-5p	-0.25	-0.3	N/A
DDX52	ENST00000349699.2	DEAD (Asp-Glu-Ala-Asp) box polypeptide 52	865	3	0	2	1	1	hsa-miR-593-5p	-0.25	-0.72	N/A
BZW1	ENST00000409600.1	basic leucine zipper and W2 domains 1	470	3	0	0	3	0	hsa-miR-593-5p	-0.25	-0.61	N/A
ADAM19	ENST00000257527.4	ADAM metallopeptidase domain 19	981	2	0	2	0	0	hsa-miR-593-5p	-0.25	-0.25	N/A
FLJ30594	ENST00000391666.2	HCG1990367; Putative uncharacterized protein DKFZp761K2322; Putative uncharacterized protein FLJ30594; cDNA FLJ30594 fis, clone BRAWH2008903	5	1	0	0	1	0	hsa-miR-593-5p	-0.25	-0.25	N/A
LAIR1	ENST00000391743.3	leukocyte-associated immunoglobulin-like receptor 1	5	1	1	0	0	0	hsa-miR-593-5p	-0.25	-0.25	N/A
TMEM52	ENST00000378602.3	transmembrane protein 52	20	1	0	0	1	0	hsa-miR-593-5p	-0.25	-0.25	N/A
FAHD2B	ENST00000414820.1	fumarylacetoacetate hydrolase domain containing 2B	8	1	0	0	1	0	hsa-miR-593-5p	-0.25	-0.25	N/A
SRCRB4D	ENST00000275560.3	scavenger receptor cysteine rich domain containing, group B (4 domains)	27	1	0	0	1	0	hsa-miR-593-5p	-0.25	-0.25	N/A
RP11-93B14.6	ENST00000370520.3	HCG2018282; Uncharacterized protein	5	1	0	0	1	1	hsa-miR-593-5p	-0.25	-0.25	N/A
GPX6	ENST00000361902.1	glutathione peroxidase 6 (olfactory)	5	1	0	1	0	0	hsa-miR-593-5p	-0.25	-0.25	N/A
DUSP8	ENST00000397374.3	dual specificity phosphatase 8	26	2	1	0	1	0	hsa-miR-593-5p	-0.25	-0.29	N/A
RPL13A	ENST00000391857.4	ribosomal protein L13a	121	1	0	0	1	0	hsa-miR-593-5p	-0.25	-0.27	N/A
AC104841.2	ENST00000601871.1	HCG1777198, isoform CRA_a; PRO2900; Uncharacterized protein	5	1	0	1	0	0	hsa-miR-593-5p	-0.25	-0.25	N/A
ORAI2	ENST00000356387.2	ORAI calcium release-activated calcium modulator 2	217	2	1	1	0	1	hsa-miR-593-5p	-0.25	-0.31	N/A
RNF114	ENST00000244061.2	ring finger protein 114	1488	1	0	1	0	0	hsa-miR-593-5p	-0.25	-0.35	N/A
OTUD5	ENST00000156084.4	OTU domain containing 5	957	1	0	0	1	1	hsa-miR-593-5p	-0.25	-0.25	N/A
TMUB2	ENST00000590235.1	transmembrane and ubiquitin-like domain containing 2	1043	1	0	1	0	0	hsa-miR-593-5p	-0.25	-0.25	N/A
SNPH	ENST00000381873.3	syntaphilin	13	1	0	0	1	1	hsa-miR-593-5p	-0.25	-0.25	N/A
AC091801.1	ENST00000402115.1	LOC392621; Uncharacterized protein	5	1	0	1	0	0	hsa-miR-593-5p	-0.25	-0.25	N/A
CMTM6	ENST00000205636.3	CKLF-like MARVEL transmembrane domain containing 6	169	1	0	1	0	0	hsa-miR-593-5p	-0.25	-0.25	N/A
NRG1	ENST00000341377.5	neuregulin 1	113	1	0	1	0	0	hsa-miR-593-5p	-0.25	-0.26	N/A
GUCA1A	ENST00000053469.4	guanylate cyclase activator 1A (retina)	5	1	0	1	0	0	hsa-miR-593-5p	-0.25	-0.25	N/A
FOXP2	ENST00000408937.3	forkhead box P2	169	1	1	0	0	0	hsa-miR-593-5p	-0.25	-0.25	N/A
WNT5A	ENST00000474267.1	wingless-type MMTV integration site family, member 5A	2080	1	0	1	0	0	hsa-miR-593-5p	-0.25	-0.25	N/A
RAB43	ENST00000476465.1	RAB43, member RAS oncogene family	5	1	0	1	0	2	hsa-miR-593-5p	-0.25	-0.29	N/A
NSUN7	ENST00000316607.5	NOP2/Sun domain family, member 7	9	1	0	0	1	0	hsa-miR-593-5p	-0.25	-0.25	N/A
GPIHBP1	ENST00000330824.2	glycosylphosphatidylinositol anchored high density lipoprotein binding protein 1	5	1	1	0	0	1	hsa-miR-593-5p	-0.25	-0.25	N/A
FABP3	ENST00000373713.2	fatty acid binding protein 3, muscle and heart (mammary-derived growth inhibitor)	168	1	0	0	1	0	hsa-miR-593-5p	-0.25	-0.25	N/A
MIP	ENST00000257979.4	major intrinsic protein of lens fiber	5	1	0	0	1	0	hsa-miR-593-5p	-0.25	-0.25	N/A
PTPRB	ENST00000334414.6	protein tyrosine phosphatase, receptor type, B	42	1	0	0	1	1	hsa-miR-593-5p	-0.25	-0.27	N/A
DEAF1	ENST00000382409.3	DEAF1 transcription factor	479	1	0	1	0	0	hsa-miR-593-5p	-0.25	-0.25	N/A
HLA-DOA	ENST00000229829.5	major histocompatibility complex, class II, DO alpha	7	1	0	0	1	0	hsa-miR-593-5p	-0.25	-0.25	N/A
TMEM117	ENST00000551577.1	transmembrane protein 117	381	1	0	1	0	0	hsa-miR-593-5p	-0.25	-0.25	N/A
HFE	ENST00000357618.5	hemochromatosis	563	1	0	1	0	0	hsa-miR-593-5p	-0.25	-0.25	N/A
BRWD3	ENST00000373275.4	bromodomain and WD repeat domain containing 3	506	2	0	1	1	0	hsa-miR-593-5p	-0.25	-0.25	N/A
WFIKKN2	ENST00000311378.4	WAP, follistatin/kazal, immunoglobulin, kunitz and netrin domain containing 2	10	1	0	0	1	1	hsa-miR-593-5p	-0.25	-0.25	N/A
CNTN6	ENST00000446702.2	contactin 6	5	1	0	0	1	0	hsa-miR-593-5p	-0.25	-0.25	N/A
PARP15	ENST00000483793.1	poly (ADP-ribose) polymerase family, member 15	5	1	0	0	1	0	hsa-miR-593-5p	-0.25	-0.25	N/A
ZNF234	ENST00000426739.2	zinc finger protein 234	137	1	0	0	1	1	hsa-miR-593-5p	-0.25	-0.28	N/A
CABLES2	ENST00000279101.5	Cdk5 and Abl enzyme substrate 2	450	1	0	0	1	0	hsa-miR-593-5p	-0.25	-0.26	N/A
ADRB3	ENST00000345060.3	adrenoceptor beta 3	5	1	0	1	0	1	hsa-miR-593-5p	-0.25	-0.25	N/A
AC005609.1	ENST00000502505.1	Uncharacterized protein; cDNA FLJ34090 fis, clone FCBBF3006399	5	1	0	1	0	0	hsa-miR-593-5p	-0.25	-0.25	N/A
TSPAN14	ENST00000429989.3	tetraspanin 14	239	2	1	1	0	4	hsa-miR-593-5p	-0.25	-0.34	N/A
DPF1	ENST00000420980.2	D4, zinc and double PHD fingers family 1	11	2	0	1	1	0	hsa-miR-593-5p	-0.25	-0.25	N/A
DACT1	ENST00000395153.3	dishevelled-binding antagonist of beta-catenin 1	248	1	0	1	0	0	hsa-miR-593-5p	-0.25	-0.25	N/A
ZNF280D	ENST00000558320.1	zinc finger protein 280D	173	2	0	2	0	0	hsa-miR-593-5p	-0.25	-0.42	N/A
DDHD2	ENST00000397166.2	DDHD domain containing 2	961	1	0	1	0	0	hsa-miR-593-5p	-0.25	-0.26	N/A
NFATC4	ENST00000413692.2	nuclear factor of activated T-cells, cytoplasmic, calcineurin-dependent 4	73	1	0	0	1	1	hsa-miR-593-5p	-0.25	-0.25	N/A
MGRN1	ENST00000415496.1	mahogunin ring finger 1, E3 ubiquitin protein ligase	2337	2	1	1	0	5	hsa-miR-593-5p	-0.25	-0.25	N/A
RGS12	ENST00000538395.1	regulator of G-protein signaling 12	635	1	0	0	1	1	hsa-miR-593-5p	-0.25	-0.25	N/A
CCDC69	ENST00000355417.2	coiled-coil domain containing 69	22	1	1	0	0	0	hsa-miR-593-5p	-0.25	-0.29	N/A
BVES	ENST00000314641.5	blood vessel epicardial substance	30	2	0	0	2	0	hsa-miR-593-5p	-0.25	-0.39	N/A
ABCE1	ENST00000296577.4	ATP-binding cassette, sub-family E (OABP), member 1	787	1	0	1	0	0	hsa-miR-593-5p	-0.25	-0.25	N/A
CDC25A	ENST00000302506.3	cell division cycle 25A	5	1	1	0	0	0	hsa-miR-593-5p	-0.25	-0.25	N/A
RPUSD1	ENST00000565809.1	RNA pseudouridylate synthase domain containing 1	1360	1	0	0	1	0	hsa-miR-593-5p	-0.25	-0.25	N/A
C17orf103	ENST00000399011.2	chromosome 17 open reading frame 103	54	1	1	0	0	2	hsa-miR-593-5p	-0.25	-0.25	N/A
GDNF	ENST00000326524.2	glial cell derived neurotrophic factor	7	1	0	0	1	0	hsa-miR-593-5p	-0.25	-0.25	N/A
SIX5	ENST00000560168.1	SIX homeobox 5	47	1	0	1	0	3	hsa-miR-593-5p	-0.25	-0.33	N/A
FOXI1	ENST00000449804.2	forkhead box I1	5	1	0	1	0	0	hsa-miR-593-5p	-0.24	-0.24	N/A
CSRNP1	ENST00000273153.5	cysteine-serine-rich nuclear protein 1	544	2	0	1	1	0	hsa-miR-593-5p	-0.24	-0.38	N/A
KLHL31	ENST00000370905.3	kelch-like family member 31	16	2	2	0	0	0	hsa-miR-593-5p	-0.24	-0.36	N/A
TMEM178B	ENST00000565468.1	transmembrane protein 178B	129	2	0	1	1	1	hsa-miR-593-5p	-0.24	-0.24	N/A
CYGB	ENST00000293230.5	cytoglobin	10	1	0	0	1	0	hsa-miR-593-5p	-0.24	-0.24	N/A
LY6D	ENST00000301263.4	lymphocyte antigen 6 complex, locus D	5	1	0	0	1	0	hsa-miR-593-5p	-0.24	-0.24	N/A
ADCK2	ENST00000072869.4	aarF domain containing kinase 2	294	1	0	0	1	0	hsa-miR-593-5p	-0.24	-0.24	N/A
PIRT	ENST00000580256.2	phosphoinositide-interacting regulator of transient receptor potential channels	5	1	0	0	1	1	hsa-miR-593-5p	-0.24	-0.24	N/A
SLC26A1	ENST00000361661.2	solute carrier family 26 (anion exchanger), member 1	241	1	0	0	1	1	hsa-miR-593-5p	-0.24	-0.25	N/A
ABAT	ENST00000268251.8	4-aminobutyrate aminotransferase	66	2	0	0	2	1	hsa-miR-593-5p	-0.24	-0.44	N/A
LDOC1L	ENST00000341255.3	leucine zipper, down-regulated in cancer 1-like	348	1	0	0	1	1	hsa-miR-593-5p	-0.24	-0.24	N/A
PTPN12	ENST00000248594.6	protein tyrosine phosphatase, non-receptor type 12	167	1	0	0	1	0	hsa-miR-593-5p	-0.24	-0.24	N/A
OPHN1	ENST00000355520.5	oligophrenin 1	54	2	1	1	0	0	hsa-miR-593-5p	-0.24	-0.24	N/A
TMEM47	ENST00000275954.3	transmembrane protein 47	129	1	0	1	0	0	hsa-miR-593-5p	-0.24	-0.24	N/A
F2RL3	ENST00000248076.3	coagulation factor II (thrombin) receptor-like 3	5	1	1	0	0	1	hsa-miR-593-5p	-0.24	-0.24	N/A
SLC2A14	ENST00000340749.5	solute carrier family 2 (facilitated glucose transporter), member 14	14	1	0	1	0	0	hsa-miR-593-5p	-0.24	-0.24	N/A
CD164L2	ENST00000374027.3	CD164 sialomucin-like 2	5	1	0	0	1	0	hsa-miR-593-5p	-0.24	-0.24	N/A
ST3GAL1	ENST00000319914.5	ST3 beta-galactoside alpha-2,3-sialyltransferase 1	59	1	0	1	0	1	hsa-miR-593-5p	-0.24	-0.24	N/A
SMAD3	ENST00000327367.4	SMAD family member 3	1140	1	1	0	0	0	hsa-miR-593-5p	-0.24	-0.33	N/A
C11orf84	ENST00000294244.4	chromosome 11 open reading frame 84	232	1	0	0	1	0	hsa-miR-593-5p	-0.24	-0.24	N/A
PPP1R9B	ENST00000316878.6	protein phosphatase 1, regulatory subunit 9B	120	1	0	0	1	1	hsa-miR-593-5p	-0.24	-0.24	N/A
FGR	ENST00000374005.3	feline Gardner-Rasheed sarcoma viral oncogene homolog	5	1	0	0	1	0	hsa-miR-593-5p	-0.24	-0.24	N/A
PTX4	ENST00000440447.2	pentraxin 4, long	5	1	0	0	1	0	hsa-miR-593-5p	-0.24	-0.24	N/A
PGF	ENST00000555567.1	placental growth factor	1745	2*	0	0	1	0	hsa-miR-593-5p	-0.24	-0.24	N/A
LAT2	ENST00000398475.1	linker for activation of T cells family, member 2	5	1	0	1	0	1	hsa-miR-593-5p	-0.24	-0.24	N/A
TK2	ENST00000299697.7	thymidine kinase 2, mitochondrial	439	4*	1	1	1	1	hsa-miR-593-5p	-0.24	-0.55	N/A
PTPN3	ENST00000412145.1	protein tyrosine phosphatase, non-receptor type 3	374	2	0	1	1	0	hsa-miR-593-5p	-0.24	-0.31	N/A
NAA10	ENST00000370015.4	N(alpha)-acetyltransferase 10, NatA catalytic subunit	960	1	0	0	1	0	hsa-miR-593-5p	-0.24	-0.24	N/A
SOCS5	ENST00000306503.5	suppressor of cytokine signaling 5	72	1	0	1	0	0	hsa-miR-593-5p	-0.24	-0.24	N/A
CCDC144NL	ENST00000327925.5	coiled-coil domain containing 144 family, N-terminal like	5	1	0	1	0	0	hsa-miR-593-5p	-0.24	-0.24	N/A
GDF5	ENST00000374369.3	growth differentiation factor 5	5	1	0	0	1	0	hsa-miR-593-5p	-0.24	-0.24	N/A
POU2F3	ENST00000260264.4	POU class 2 homeobox 3	5	2	0	1	1	1	hsa-miR-593-5p	-0.24	-0.24	N/A
EGR2	ENST00000242480.3	early growth response 2	5	1	0	1	0	0	hsa-miR-593-5p	-0.24	-0.24	N/A
TNFSF18	ENST00000404377.3	tumor necrosis factor (ligand) superfamily, member 18	5	1	0	0	1	0	hsa-miR-593-5p	-0.24	-0.24	N/A
B4GALT3	ENST00000319769.5	UDP-Gal:betaGlcNAc beta 1,4- galactosyltransferase, polypeptide 3	46	1	0	1	0	0	hsa-miR-593-5p	-0.24	-0.24	N/A
OCLN	ENST00000355237.2	occludin	5	1	0	1	0	1	hsa-miR-593-5p	-0.24	-0.24	N/A
PIM1	ENST00000373509.5	pim-1 oncogene	2041	1	0	0	1	0	hsa-miR-593-5p	-0.24	-0.24	N/A
DCTN3	ENST00000447983.2	dynactin 3 (p22)	1816	1	0	1	0	0	hsa-miR-593-5p	-0.24	-0.24	N/A
PAFAH1B1	ENST00000397195.5	platelet-activating factor acetylhydrolase 1b, regulatory subunit 1 (45kDa)	1570	1	0	1	0	0	hsa-miR-593-5p	-0.24	-0.26	N/A
KAT7	ENST00000259021.4	K(lysine) acetyltransferase 7	48	2	1	0	1	3	hsa-miR-593-5p	-0.24	-0.42	N/A
TMEM203	ENST00000343666.5	transmembrane protein 203	829	1	0	0	1	0	hsa-miR-593-5p	-0.24	-0.34	N/A
SMOC1	ENST00000381280.4	SPARC related modular calcium binding 1	2743	2	0	1	1	0	hsa-miR-593-5p	-0.24	-0.34	N/A
ENTPD6	ENST00000433259.2	ectonucleoside triphosphate diphosphohydrolase 6 (putative)	616	1	0	0	1	1	hsa-miR-593-5p	-0.24	-0.25	N/A
ARHGAP35	ENST00000404338.3	Rho GTPase activating protein 35	278	3	0	2	1	1	hsa-miR-593-5p	-0.24	-0.24	N/A
SLC9A9	ENST00000316549.6	solute carrier family 9, subfamily A (NHE9, cation proton antiporter 9), member 9	5	1	0	1	0	1	hsa-miR-593-5p	-0.24	-0.24	N/A
ZNF213	ENST00000396878.3	zinc finger protein 213	48	2	0	2	0	0	hsa-miR-593-5p	-0.24	-0.24	N/A
ZNF451	ENST00000370708.4	zinc finger protein 451	190	1	1	0	0	0	hsa-miR-593-5p	-0.24	-0.24	N/A
RNMT	ENST00000383314.2	RNA (guanine-7-) methyltransferase	64	1	1	0	0	0	hsa-miR-593-5p	-0.24	-0.37	N/A
NRG2	ENST00000394770.1	neuregulin 2	9	2	0	1	1	0	hsa-miR-593-5p	-0.24	-0.33	N/A
SIRPG	ENST00000381580.1	signal-regulatory protein gamma	5	1	0	0	1	0	hsa-miR-593-5p	-0.24	-0.24	N/A
DYNC1I1	ENST00000447467.2	dynein, cytoplasmic 1, intermediate chain 1	25	1	0	0	1	0	hsa-miR-593-5p	-0.24	-0.24	N/A
AK7	ENST00000267584.4	adenylate kinase 7	30	1	0	1	0	0	hsa-miR-593-5p	-0.24	-0.24	N/A
SNW1	ENST00000261531.7	SNW domain containing 1	13	1	0	0	1	0	hsa-miR-593-5p	-0.24	-0.24	N/A
CXCR1	ENST00000295683.2	chemokine (C-X-C motif) receptor 1	5	1	0	1	0	0	hsa-miR-593-5p	-0.24	-0.24	N/A
ZNF74	ENST00000357502.5	zinc finger protein 74	142	1	0	0	1	3	hsa-miR-593-5p	-0.24	-0.29	N/A
SH3PXD2A	ENST00000369774.4	SH3 and PX domains 2A	152	1	0	0	1	3	hsa-miR-593-5p	-0.24	-0.24	N/A
LRP11	ENST00000239367.2	low density lipoprotein receptor-related protein 11	3235	1	0	1	0	0	hsa-miR-593-5p	-0.24	-0.24	N/A
ACOT11	ENST00000343744.2	acyl-CoA thioesterase 11	36	2	1	1	0	0	hsa-miR-593-5p	-0.24	-0.24	N/A
RNF19A	ENST00000519449.1	ring finger protein 19A, RBR E3 ubiquitin protein ligase	1674	1	0	1	0	0	hsa-miR-593-5p	-0.24	-0.24	N/A
UPK2	ENST00000264031.2	uroplakin 2	5	1	0	1	0	0	hsa-miR-593-5p	-0.24	-0.24	N/A
IL34	ENST00000429149.2	interleukin 34	5	1	0	0	1	0	hsa-miR-593-5p	-0.24	-0.24	N/A
GPR37L1	ENST00000367282.5	G protein-coupled receptor 37 like 1	5	3	0	3	0	1	hsa-miR-593-5p	-0.24	-0.24	N/A
KRT35	ENST00000246639.2	keratin 35	5	1	0	0	1	0	hsa-miR-593-5p	-0.24	-0.24	N/A
RPL7L1	ENST00000493763.1	ribosomal protein L7-like 1	824	1	0	0	1	0	hsa-miR-593-5p	-0.24	-0.24	N/A
CTDSPL2	ENST00000260327.4	CTD (carboxy-terminal domain, RNA polymerase II, polypeptide A) small phosphatase like 2	457	1	0	1	0	0	hsa-miR-593-5p	-0.24	-0.24	N/A
ADCK1	ENST00000238561.5	aarF domain containing kinase 1	215	1	0	0	1	0	hsa-miR-593-5p	-0.24	-0.24	N/A
ZBTB5	ENST00000307750.4	zinc finger and BTB domain containing 5	281	2	1	1	0	0	hsa-miR-593-5p	-0.24	-0.24	N/A
CTSD	ENST00000236671.2	cathepsin D	2057	1	1	0	0	0	hsa-miR-593-5p	-0.24	-0.24	N/A
GPAM	ENST00000348367.4	glycerol-3-phosphate acyltransferase, mitochondrial	153	1	0	0	1	1	hsa-miR-593-5p	-0.23	-0.24	N/A
TSTD2	ENST00000341170.4	thiosulfate sulfurtransferase (rhodanese)-like domain containing 2	219	1	1	0	0	0	hsa-miR-593-5p	-0.23	-0.23	N/A
PIK3CD	ENST00000536656.1	phosphatidylinositol-4,5-bisphosphate 3-kinase, catalytic subunit delta	5	2	0	1	1	0	hsa-miR-593-5p	-0.23	-0.23	N/A
KLF6	ENST00000542957.1	Kruppel-like factor 6	4644	1	0	1	0	0	hsa-miR-593-5p	-0.23	-0.23	N/A
SLC46A1	ENST00000440501.1	solute carrier family 46 (folate transporter), member 1	580	2	0	1	1	0	hsa-miR-593-5p	-0.23	-0.25	N/A
CATSPERG	ENST00000215069.4	catsper channel auxiliary subunit gamma	5	1	1	0	0	0	hsa-miR-593-5p	-0.23	-0.23	N/A
FAM132B	ENST00000546354.1	family with sequence similarity 132, member B	722	2	0	1	1	0	hsa-miR-593-5p	-0.23	-0.23	N/A
SNX32	ENST00000308342.6	sorting nexin 32	39	1	0	0	1	0	hsa-miR-593-5p	-0.23	-0.23	N/A
THSD4	ENST00000355327.3	thrombospondin, type I, domain containing 4	69	1	0	1	0	0	hsa-miR-593-5p	-0.23	-0.23	N/A
ABCF1	ENST00000326195.8	ATP-binding cassette, sub-family F (GCN20), member 1	1078	1	0	1	0	0	hsa-miR-593-5p	-0.23	-0.23	N/A
GTPBP2	ENST00000307126.5	GTP binding protein 2	388	1	0	0	1	0	hsa-miR-593-5p	-0.23	-0.23	N/A
PRRX1	ENST00000367760.3	paired related homeobox 1	57	1	0	0	1	0	hsa-miR-593-5p	-0.23	-0.23	N/A
SLC18A1	ENST00000437980.1	solute carrier family 18 (vesicular monoamine transporter), member 1	5	1	0	1	0	0	hsa-miR-593-5p	-0.23	-0.23	N/A
GPR173	ENST00000332582.4	G protein-coupled receptor 173	99	1	0	0	1	1	hsa-miR-593-5p	-0.23	-0.23	N/A
STRN4	ENST00000263280.6	striatin, calmodulin binding protein 4	1039	1	0	0	1	0	hsa-miR-593-5p	-0.23	-0.23	N/A
TXLNA	ENST00000373610.3	taxilin alpha	564	1	0	1	0	4	hsa-miR-593-5p	-0.23	-0.24	N/A
MMP17	ENST00000535291.1	matrix metallopeptidase 17 (membrane-inserted)	9	1	0	1	0	3	hsa-miR-593-5p	-0.23	-0.26	N/A
NME3	ENST00000219302.3	NME/NM23 nucleoside diphosphate kinase 3	3070	1	0	1	0	0	hsa-miR-593-5p	-0.23	-0.23	N/A
LHFPL5	ENST00000360215.1	lipoma HMGIC fusion partner-like 5	5	1	0	1	0	0	hsa-miR-593-5p	-0.23	-0.23	N/A
ACP2	ENST00000256997.3	acid phosphatase 2, lysosomal	235	1	0	1	0	0	hsa-miR-593-5p	-0.23	-0.23	N/A
TBPL1	ENST00000237264.4	TBP-like 1	69	1	0	1	0	0	hsa-miR-593-5p	-0.23	-0.27	N/A
ENPP4	ENST00000321037.4	ectonucleotide pyrophosphatase/phosphodiesterase 4 (putative)	114	1	1	0	0	0	hsa-miR-593-5p	-0.23	-0.25	N/A
PCYT1B	ENST00000379145.1	phosphate cytidylyltransferase 1, choline, beta	5	1	0	0	1	1	hsa-miR-593-5p	-0.23	-0.23	N/A
AC008060.7	ENST00000401499.1	HCG2000720; Hypothetical gene supported by AK054822; Uncharacterized protein	5	1	0	1	0	1	hsa-miR-593-5p	-0.23	-0.23	N/A
AMMECR1L	ENST00000272647.5	AMMECR1-like	21	1	0	0	1	1	hsa-miR-593-5p	-0.23	-0.23	N/A
KIF13B	ENST00000524189.1	kinesin family member 13B	17	3	1	2	0	2	hsa-miR-593-5p	-0.23	-0.23	N/A
ATP2B3	ENST00000370186.1	ATPase, Ca++ transporting, plasma membrane 3	5	2	0	0	2	0	hsa-miR-593-5p	-0.23	-0.23	N/A
KLHDC10	ENST00000335420.5	kelch domain containing 10	347	1	1	0	0	0	hsa-miR-593-5p	-0.23	-0.27	N/A
FNDC1	ENST00000297267.9	fibronectin type III domain containing 1	137	1	0	0	1	0	hsa-miR-593-5p	-0.23	-0.23	N/A
ARHGEF4	ENST00000392953.3	Rho guanine nucleotide exchange factor (GEF) 4	189	2	1	1	0	0	hsa-miR-593-5p	-0.23	-0.23	N/A
C5AR2	ENST00000595464.1	complement component 5a receptor 2	5	1	0	0	1	0	hsa-miR-593-5p	-0.23	-0.23	N/A
ANKRD34C	ENST00000421388.2	ankyrin repeat domain 34C	5	1	0	1	0	0	hsa-miR-593-5p	-0.23	-0.23	N/A
ZDHHC2	ENST00000262096.8	zinc finger, DHHC-type containing 2	171	1	0	0	1	0	hsa-miR-593-5p	-0.23	-0.23	N/A
FOXQ1	ENST00000296839.2	forkhead box Q1	181	1	0	0	1	0	hsa-miR-593-5p	-0.23	-0.23	N/A
FNBP1	ENST00000355681.3	formin binding protein 1	165	1	0	0	1	1	hsa-miR-593-5p	-0.23	-0.27	N/A
LAX1	ENST00000442561.2	lymphocyte transmembrane adaptor 1	5	2	1	1	0	0	hsa-miR-593-5p	-0.23	-0.32	N/A
C17orf59	ENST00000389017.4	chromosome 17 open reading frame 59	664	1	0	0	1	0	hsa-miR-593-5p	-0.23	-0.23	N/A
TSTA3	ENST00000529064.1	tissue specific transplantation antigen P35B	24	1	0	0	1	0	hsa-miR-593-5p	-0.23	-0.23	N/A
RP11-766F14.2	ENST00000511828.1	Protein LOC285556	5	1	0	1	0	1	hsa-miR-593-5p	-0.23	-0.23	N/A
ATG9A	ENST00000396761.2	autophagy related 9A	50	1	0	0	1	0	hsa-miR-593-5p	-0.23	-0.23	N/A
KLHL40	ENST00000287777.4	kelch-like family member 40	5	1	0	1	0	0	hsa-miR-593-5p	-0.23	-0.23	N/A
SLC13A2	ENST00000314669.5	solute carrier family 13 (sodium-dependent dicarboxylate transporter), member 2	5	1	0	1	0	0	hsa-miR-593-5p	-0.23	-0.23	N/A
SLC6A2	ENST00000567238.1	solute carrier family 6 (neurotransmitter transporter), member 2	5	1	0	1	0	1	hsa-miR-593-5p	-0.23	-0.23	N/A
KIAA0040	ENST00000423313.1	KIAA0040	15	1	0	0	1	0	hsa-miR-593-5p	-0.23	-0.23	N/A
FKBP1A	ENST00000400137.4	FK506 binding protein 1A, 12kDa	72	1	0	1	0	0	hsa-miR-593-5p	-0.23	-0.23	N/A
NPTX2	ENST00000265634.3	neuronal pentraxin II	56	1	1	0	0	0	hsa-miR-593-5p	-0.23	-0.34	N/A
TPI1	ENST00000229270.4	triosephosphate isomerase 1	4748	1	0	1	0	0	hsa-miR-593-5p	-0.23	-0.23	N/A
KLHL42	ENST00000381271.2	kelch-like family member 42	2120	1	1	0	0	0	hsa-miR-593-5p	-0.23	-0.24	N/A
ELN	ENST00000252034.7	elastin	445	1	0	0	1	0	hsa-miR-593-5p	-0.23	-0.23	N/A
ASB5	ENST00000296525.3	ankyrin repeat and SOCS box containing 5	5	1	0	0	1	0	hsa-miR-593-5p	-0.23	-0.23	N/A
SLC9A8	ENST00000361573.2	solute carrier family 9, subfamily A (NHE8, cation proton antiporter 8), member 8	474	3	0	1	2	0	hsa-miR-593-5p	-0.23	-0.23	N/A
LPHN1	ENST00000340736.6	latrophilin 1	49	3	0	1	2	1	hsa-miR-593-5p	-0.23	-0.27	N/A
ETV1	ENST00000430479.1	ets variant 1	160	1	1	0	0	0	hsa-miR-593-5p	-0.23	-0.26	N/A
LIG3	ENST00000378526.4	ligase III, DNA, ATP-dependent	554	1	0	0	1	0	hsa-miR-593-5p	-0.23	-0.23	N/A
SLAMF8	ENST00000289707.5	SLAM family member 8	5	1	0	1	0	0	hsa-miR-593-5p	-0.23	-0.23	N/A
MYOG	ENST00000241651.4	myogenin (myogenic factor 4)	5	1	0	0	1	0	hsa-miR-593-5p	-0.23	-0.23	N/A
GSG1	ENST00000396302.3	germ cell associated 1	5	1	0	0	1	0	hsa-miR-593-5p	-0.23	-0.23	N/A
LRCH4	ENST00000310300.6	leucine-rich repeats and calponin homology (CH) domain containing 4	248	1	0	1	0	2	hsa-miR-593-5p	-0.23	-0.23	N/A
NIPAL4	ENST00000311946.7	NIPA-like domain containing 4	17	1	0	0	1	0	hsa-miR-593-5p	-0.23	-0.23	N/A
C16orf70	ENST00000219139.3	chromosome 16 open reading frame 70	485	1	1	0	0	0	hsa-miR-593-5p	-0.23	-0.23	N/A
CENPF	ENST00000366955.3	centromere protein F, 350/400kDa	181	1	0	0	1	1	hsa-miR-593-5p	-0.23	-0.24	N/A
B3GALT5	ENST00000380620.4	UDP-Gal:betaGlcNAc beta 1,3-galactosyltransferase, polypeptide 5	5	3	1	2	0	1	hsa-miR-593-5p	-0.23	-0.23	N/A
FMNL2	ENST00000288670.9	formin-like 2	31	1	0	1	0	0	hsa-miR-593-5p	-0.23	-0.23	N/A
NARFL	ENST00000251588.2	nuclear prelamin A recognition factor-like	63	1	0	0	1	1	hsa-miR-593-5p	-0.23	-0.23	N/A
TARBP2	ENST00000266987.2	TAR (HIV-1) RNA binding protein 2	1553	1	0	0	1	0	hsa-miR-593-5p	-0.23	-0.23	N/A
BTBD2	ENST00000255608.4	BTB (POZ) domain containing 2	77	2	0	1	1	0	hsa-miR-593-5p	-0.23	-0.23	N/A
RBFA	ENST00000262197.7	ribosome binding factor A (putative)	131	3	0	2	1	1	hsa-miR-593-5p	-0.22	-0.47	N/A
GLE1	ENST00000309971.4	GLE1 RNA export mediator	303	1	0	0	1	0	hsa-miR-593-5p	-0.22	-0.32	N/A
DAAM2	ENST00000538976.1	dishevelled associated activator of morphogenesis 2	5	2	0	1	1	0	hsa-miR-593-5p	-0.22	-0.22	N/A
CDC20B	ENST00000334206.5	cell division cycle 20B	5	1	0	0	1	0	hsa-miR-593-5p	-0.22	-0.22	N/A
HRH1	ENST00000397056.1	histamine receptor H1	130	1	1	0	0	0	hsa-miR-593-5p	-0.22	-0.4	N/A
ZNF713	ENST00000429591.2	zinc finger protein 713	5	1	1	0	0	0	hsa-miR-593-5p	-0.22	-0.22	N/A
AC005477.1	ENST00000542853.1		5	1	0	0	1	0	hsa-miR-593-5p	-0.22	-0.22	N/A
AL117190.3	ENST00000599197.1	Esophagus cancer-related gene-2 interaction susceptibility protein; Uncharacterized protein	30	2	0	1	1	1	hsa-miR-593-5p	-0.22	-0.27	N/A
FGF20	ENST00000180166.5	fibroblast growth factor 20	5	1	0	1	0	0	hsa-miR-593-5p	-0.22	-0.22	N/A
HTR2C	ENST00000371950.3	5-hydroxytryptamine (serotonin) receptor 2C, G protein-coupled	5	1	0	1	0	0	hsa-miR-593-5p	-0.22	-0.22	N/A
CACTIN	ENST00000429344.2	cactin, spliceosome C complex subunit	1422	2	0	0	2	0	hsa-miR-593-5p	-0.22	-0.22	N/A
ARHGAP21	ENST00000396432.2	Rho GTPase activating protein 21	10	1	0	0	1	0	hsa-miR-593-5p	-0.22	-0.22	N/A
KPNB1	ENST00000290158.4	karyopherin (importin) beta 1	465	2	1	1	0	0	hsa-miR-593-5p	-0.22	-0.43	N/A
GPS1	ENST00000578552.1	G protein pathway suppressor 1	119	1	0	0	1	0	hsa-miR-593-5p	-0.22	-0.22	N/A
TINF2	ENST00000399423.4	TERF1 (TRF1)-interacting nuclear factor 2	1214	1	0	0	1	0	hsa-miR-593-5p	-0.22	-0.23	N/A
ALOX15	ENST00000570836.1	arachidonate 15-lipoxygenase	5	1	1	0	0	1	hsa-miR-593-5p	-0.22	-0.28	N/A
C10orf11	ENST00000496424.2	chromosome 10 open reading frame 11	5	1	0	1	0	0	hsa-miR-593-5p	-0.22	-0.22	N/A
PROX2	ENST00000556084.2	prospero homeobox 2	5	1	0	1	0	0	hsa-miR-593-5p	-0.22	-0.22	N/A
SLCO5A1	ENST00000260126.4	solute carrier organic anion transporter family, member 5A1	9	1	0	0	1	0	hsa-miR-593-5p	-0.22	-0.22	N/A
NDRG2	ENST00000298687.5	NDRG family member 2	217	1	0	1	0	1	hsa-miR-593-5p	-0.22	-0.22	N/A
SCRT1	ENST00000332135.4	scratch homolog 1, zinc finger protein (Drosophila)	5	2	0	1	1	1	hsa-miR-593-5p	-0.22	-0.22	N/A
TRPM8	ENST00000324695.4	transient receptor potential cation channel, subfamily M, member 8	5	1	0	1	0	0	hsa-miR-593-5p	-0.22	-0.22	N/A
ICOS	ENST00000435193.1	inducible T-cell co-stimulator	5	1	0	1	0	0	hsa-miR-593-5p	-0.22	-0.22	N/A
CORO2A	ENST00000343933.5	coronin, actin binding protein, 2A	493	1	0	1	0	0	hsa-miR-593-5p	-0.22	-0.23	N/A
OXCT2	ENST00000327582.5	3-oxoacid CoA transferase 2	5	1	0	0	1	0	hsa-miR-593-5p	-0.22	-0.22	N/A
SCRG1	ENST00000296506.3	stimulator of chondrogenesis 1	5	1	0	0	1	1	hsa-miR-593-5p	-0.22	-0.22	N/A
FEZ1	ENST00000278919.3	fasciculation and elongation protein zeta 1 (zygin I)	93	1	0	1	0	0	hsa-miR-593-5p	-0.22	-0.22	N/A
KIDINS220	ENST00000256707.3	kinase D-interacting substrate, 220kDa	87	1	0	1	0	0	hsa-miR-593-5p	-0.22	-0.22	N/A
PITHD1	ENST00000246151.4	PITH (C-terminal proteasome-interacting domain of thioredoxin-like) domain containing 1	718	1	0	0	1	0	hsa-miR-593-5p	-0.22	-0.22	N/A
CELF1	ENST00000395290.2	CUGBP, Elav-like family member 1	153	3*	0	0	2	0	hsa-miR-593-5p	-0.22	-0.26	N/A
G3BP2	ENST00000395719.3	GTPase activating protein (SH3 domain) binding protein 2	4413	1	0	1	0	0	hsa-miR-593-5p	-0.22	-0.22	N/A
IL24	ENST00000367093.3	interleukin 24	10	1	0	1	0	1	hsa-miR-593-5p	-0.22	-0.36	N/A
EVPL	ENST00000301607.3	envoplakin	9	1	0	1	0	0	hsa-miR-593-5p	-0.22	-0.22	N/A
ZDHHC8	ENST00000334554.7	zinc finger, DHHC-type containing 8	5	1	1	0	0	1	hsa-miR-593-5p	-0.22	-0.22	N/A
EGR1	ENST00000239938.4	early growth response 1	1956	1	0	1	0	0	hsa-miR-593-5p	-0.22	-0.22	N/A
SMAD5	ENST00000545279.1	SMAD family member 5	225	1	0	1	0	1	hsa-miR-593-5p	-0.22	-0.29	N/A
C19orf25	ENST00000436106.2	chromosome 19 open reading frame 25	498	2	0	1	1	2	hsa-miR-593-5p	-0.22	-0.52	N/A
PTPRG	ENST00000474889.1	protein tyrosine phosphatase, receptor type, G	696	1	1	0	0	0	hsa-miR-593-5p	-0.22	-0.28	N/A
TEX19	ENST00000333437.4	testis expressed 19	14	1	0	0	1	0	hsa-miR-593-5p	-0.22	-0.22	N/A
ZNF425	ENST00000378061.2	zinc finger protein 425	45	1	0	0	1	0	hsa-miR-593-5p	-0.22	-0.22	N/A
FLG2	ENST00000388718.5	filaggrin family member 2	5	1	1	0	0	0	hsa-miR-593-5p	-0.22	-0.22	N/A
ZNF667	ENST00000591790.1	zinc finger protein 667	24	1	0	0	1	0	hsa-miR-593-5p	-0.22	-0.22	N/A
ERRFI1	ENST00000377482.5	ERBB receptor feedback inhibitor 1	3807	1	0	0	1	0	hsa-miR-593-5p	-0.22	-0.22	N/A
POGK	ENST00000367875.1	pogo transposable element with KRAB domain	377	2	2	0	0	0	hsa-miR-593-5p	-0.22	-0.22	N/A
SPDL1	ENST00000265295.4	spindle apparatus coiled-coil protein 1	427	1	0	0	1	0	hsa-miR-593-5p	-0.22	-0.22	N/A
CD74	ENST00000377795.3	CD74 molecule, major histocompatibility complex, class II invariant chain	168	1	0	1	0	0	hsa-miR-593-5p	-0.22	-0.22	N/A
ANK1	ENST00000289734.7	ankyrin 1, erythrocytic	5	2	0	0	2	0	hsa-miR-593-5p	-0.22	-0.22	N/A
TEF	ENST00000266304.4	thyrotrophic embryonic factor	60	2	0	2	0	0	hsa-miR-593-5p	-0.22	-0.23	N/A
DCTN5	ENST00000300087.2	dynactin 5 (p25)	764	1	0	0	1	2	hsa-miR-593-5p	-0.22	-0.28	N/A
GTF3C1	ENST00000561623.1	general transcription factor IIIC, polypeptide 1, alpha 220kDa	19	2*	0	0	1	0	hsa-miR-593-5p	-0.22	-0.22	N/A
KIAA1644	ENST00000381176.4	KIAA1644	10	1	0	0	1	1	hsa-miR-593-5p	-0.22	-0.22	N/A
SLC25A42	ENST00000318596.7	solute carrier family 25, member 42	1088	1	1	0	0	1	hsa-miR-593-5p	-0.22	-0.22	N/A
NOS1	ENST00000317775.6	nitric oxide synthase 1 (neuronal)	5	2	0	1	1	1	hsa-miR-593-5p	-0.22	-0.22	N/A
CPXM2	ENST00000241305.3	carboxypeptidase X (M14 family), member 2	5	1	0	0	1	0	hsa-miR-593-5p	-0.22	-0.22	N/A
ZNF248	ENST00000395867.3	zinc finger protein 248	43	1	1	0	0	0	hsa-miR-593-5p	-0.22	-0.31	N/A
AP3S2	ENST00000336418.4	adaptor-related protein complex 3, sigma 2 subunit	985	2	0	0	2	1	hsa-miR-593-5p	-0.22	-0.34	N/A
AHCY	ENST00000217426.2	adenosylhomocysteinase	27	1	0	1	0	0	hsa-miR-593-5p	-0.22	-0.31	N/A
BSN	ENST00000296452.4	bassoon presynaptic cytomatrix protein	31	2	0	1	1	0	hsa-miR-593-5p	-0.21	-0.21	N/A
ARFGAP1	ENST00000370275.4	ADP-ribosylation factor GTPase activating protein 1	510	1	0	1	0	2	hsa-miR-593-5p	-0.21	-0.21	N/A
RCOR1	ENST00000262241.6	REST corepressor 1	403	1	0	1	0	0	hsa-miR-593-5p	-0.21	-0.21	N/A
ZNF236	ENST00000253159.8	zinc finger protein 236	60	1	1	0	0	0	hsa-miR-593-5p	-0.21	-0.21	N/A
SV2A	ENST00000369146.3	synaptic vesicle glycoprotein 2A	10	1	0	1	0	1	hsa-miR-593-5p	-0.21	-0.21	N/A
FICD	ENST00000552695.1	FIC domain containing	54	1	0	0	1	0	hsa-miR-593-5p	-0.21	-0.21	N/A
MAPK4	ENST00000592595.1	mitogen-activated protein kinase 4	77	1	0	0	1	0	hsa-miR-593-5p	-0.21	-0.21	N/A
FYTTD1	ENST00000241502.4	forty-two-three domain containing 1	891	1	0	1	0	1	hsa-miR-593-5p	-0.21	-0.3	N/A
RRM2	ENST00000360566.2	ribonucleotide reductase M2	3907	2	1	1	0	0	hsa-miR-593-5p	-0.21	-0.47	N/A
CACUL1	ENST00000369151.3	CDK2-associated, cullin domain 1	213	1	0	1	0	0	hsa-miR-593-5p	-0.21	-0.34	N/A
ERBB3	ENST00000267101.3	v-erb-b2 avian erythroblastic leukemia viral oncogene homolog 3	926	1	0	0	1	1	hsa-miR-593-5p	-0.21	-0.28	N/A
TPP1	ENST00000299427.6	tripeptidyl peptidase I	713	1	0	1	0	0	hsa-miR-593-5p	-0.21	-0.27	N/A
FAM160B2	ENST00000289921.7	family with sequence similarity 160, member B2	803	1	0	0	1	0	hsa-miR-593-5p	-0.21	-0.21	N/A
PHF19	ENST00000373896.3	PHD finger protein 19	490	1	0	1	0	0	hsa-miR-593-5p	-0.21	-0.21	N/A
CLEC12A	ENST00000434319.2	C-type lectin domain family 12, member A	5	1	0	0	1	0	hsa-miR-593-5p	-0.21	-0.21	N/A
FAM169B	ENST00000558256.1	family with sequence similarity 169, member B	5	1	0	1	0	1	hsa-miR-593-5p	-0.21	-0.21	N/A
KCNS1	ENST00000306117.1	potassium voltage-gated channel, delayed-rectifier, subfamily S, member 1	5	1	0	0	1	0	hsa-miR-593-5p	-0.21	-0.21	N/A
SYNGR1	ENST00000328933.5	synaptogyrin 1	101	1	0	0	1	2	hsa-miR-593-5p	-0.21	-0.21	N/A
CMTR1	ENST00000373451.4	cap methyltransferase 1	109	1	0	0	1	0	hsa-miR-593-5p	-0.21	-0.21	N/A
C10orf118	ENST00000543782.1	chromosome 10 open reading frame 118	146	1	0	0	1	0	hsa-miR-593-5p	-0.21	-0.21	N/A
GANC	ENST00000440615.2	glucosidase, alpha; neutral C	83	1	0	1	0	0	hsa-miR-593-5p	-0.21	-0.21	N/A
IL1R2	ENST00000332549.3	interleukin 1 receptor, type II	8	1	0	0	1	0	hsa-miR-593-5p	-0.21	-0.37	N/A
LRRC49	ENST00000260382.5	leucine rich repeat containing 49	94	1	0	1	0	0	hsa-miR-593-5p	-0.21	-0.24	N/A
MAP4K5	ENST00000013125.4	mitogen-activated protein kinase kinase kinase kinase 5	634	1	0	0	1	0	hsa-miR-593-5p	-0.21	-0.23	N/A
SPOPL	ENST00000280098.4	speckle-type POZ protein-like	216	1	0	0	1	0	hsa-miR-593-5p	-0.21	-0.24	N/A
ATXN7L3B	ENST00000519948.2	ataxin 7-like 3B	55	1	0	1	0	1	hsa-miR-593-5p	-0.21	-0.21	N/A
CEP72	ENST00000444221.1	centrosomal protein 72kDa	230	1	0	1	0	0	hsa-miR-593-5p	-0.21	-0.21	N/A
DUSP15	ENST00000486996.1	dual specificity phosphatase 15	10	1	0	1	0	0	hsa-miR-593-5p	-0.21	-0.21	N/A
KCNS2	ENST00000287042.4	potassium voltage-gated channel, delayed-rectifier, subfamily S, member 2	5	1	0	1	0	0	hsa-miR-593-5p	-0.21	-0.21	N/A
DDX20	ENST00000369702.4	DEAD (Asp-Glu-Ala-Asp) box polypeptide 20	729	1	0	0	1	0	hsa-miR-593-5p	-0.21	-0.21	N/A
SPATA2L	ENST00000289805.5	spermatogenesis associated 2-like	10	1	0	1	0	1	hsa-miR-593-5p	-0.21	-0.21	N/A
GRIK4	ENST00000527524.2	glutamate receptor, ionotropic, kainate 4	5	1	1	0	0	0	hsa-miR-593-5p	-0.21	-0.21	N/A
MTMR3	ENST00000333027.3	myotubularin related protein 3	123	1	0	0	1	1	hsa-miR-593-5p	-0.21	-0.23	N/A
HBEGF	ENST00000230990.6	heparin-binding EGF-like growth factor	28	1	1	0	0	0	hsa-miR-593-5p	-0.21	-0.56	N/A
SOX21	ENST00000376945.2	SRY (sex determining region Y)-box 21	6	1	0	0	1	0	hsa-miR-593-5p	-0.21	-0.21	N/A
SH3PXD2B	ENST00000311601.5	SH3 and PX domains 2B	123	2	1	0	1	2	hsa-miR-593-5p	-0.21	-0.24	N/A
TNK2	ENST00000381916.2	tyrosine kinase, non-receptor, 2	7	1	0	0	1	1	hsa-miR-593-5p	-0.21	-0.21	N/A
CARD9	ENST00000371732.5	caspase recruitment domain family, member 9	6	1	0	1	0	1	hsa-miR-593-5p	-0.21	-0.21	N/A
VKORC1L1	ENST00000360768.3	vitamin K epoxide reductase complex, subunit 1-like 1	2291	1	1	0	0	0	hsa-miR-593-5p	-0.21	-0.44	N/A
BCAT1	ENST00000261192.7	branched chain amino-acid transaminase 1, cytosolic	1346	1	1	0	0	0	hsa-miR-593-5p	-0.21	-0.22	N/A
AGPAT4	ENST00000366911.5	1-acylglycerol-3-phosphate O-acyltransferase 4	142	2	0	1	1	0	hsa-miR-593-5p	-0.21	-0.33	N/A
C5orf28	ENST00000500337.2	chromosome 5 open reading frame 28	1711	1	0	1	0	0	hsa-miR-593-5p	-0.21	-0.35	N/A
ADAMTS16	ENST00000274181.7	ADAM metallopeptidase with thrombospondin type 1 motif, 16	12	1	0	1	0	0	hsa-miR-593-5p	-0.21	-0.21	N/A
PTPRQ	ENST00000266688.5	protein tyrosine phosphatase, receptor type, Q	0	1	1	0	0	0	hsa-miR-593-5p	-0.21	-0.21	N/A
SF1	ENST00000377390.3	splicing factor 1	17473	1	0	0	1	2	hsa-miR-593-5p	-0.21	-0.3	N/A
HKR1	ENST00000324411.4	HKR1, GLI-Kruppel zinc finger family member	69	1	0	1	0	0	hsa-miR-593-5p	-0.21	-0.21	N/A
C19orf66	ENST00000253110.11	chromosome 19 open reading frame 66	567	1	1	0	0	0	hsa-miR-593-5p	-0.21	-0.26	N/A
TBC1D10B	ENST00000409939.3	TBC1 domain family, member 10B	174	1	0	0	1	0	hsa-miR-593-5p	-0.21	-0.21	N/A
FKBP1C	ENST00000370659.1	FK506 binding protein 1C	30	1	0	1	0	0	hsa-miR-593-5p	-0.21	-0.21	N/A
C10orf35	ENST00000373279.4	chromosome 10 open reading frame 35	84	1	0	1	0	0	hsa-miR-593-5p	-0.21	-0.21	N/A
CHRNE	ENST00000293780.4	cholinergic receptor, nicotinic, epsilon (muscle)	11	1	0	0	1	0	hsa-miR-593-5p	-0.21	-0.21	N/A
CACNA1G	ENST00000352832.5	calcium channel, voltage-dependent, T type, alpha 1G subunit	11	1	0	0	1	0	hsa-miR-593-5p	-0.21	-0.21	N/A
ZBTB41	ENST00000367405.4	zinc finger and BTB domain containing 41	33	1	0	0	1	0	hsa-miR-593-5p	-0.21	-0.23	N/A
SHB	ENST00000377707.3	Src homology 2 domain containing adaptor protein B	1436	1	0	0	1	1	hsa-miR-593-5p	-0.21	-0.25	N/A
ALS2	ENST00000457679.2	amyotrophic lateral sclerosis 2 (juvenile)	206	1	0	1	0	0	hsa-miR-593-5p	-0.21	-0.21	N/A
LINC00908	ENST00000578613.1	long intergenic non-protein coding RNA 908	5	1	0	1	0	0	hsa-miR-593-5p	-0.21	-0.21	N/A
MAL2	ENST00000276681.6	mal, T-cell differentiation protein 2 (gene/pseudogene)	2056	1	0	0	1	0	hsa-miR-593-5p	-0.21	-0.24	N/A
FAM86A	ENST00000458008.4	family with sequence similarity 86, member A	5	1	0	1	0	1	hsa-miR-593-5p	-0.21	-0.21	N/A
PES1	ENST00000354694.7	pescadillo ribosomal biogenesis factor 1	848	1	0	1	0	0	hsa-miR-593-5p	-0.21	-0.21	N/A
C9orf141	ENST00000371629.1	chromosome 9 open reading frame 141	5	1	0	1	0	0	hsa-miR-593-5p	-0.21	-0.21	N/A
KIR2DL4	ENST00000359085.4	killer cell immunoglobulin-like receptor, two domains, long cytoplasmic tail, 4	5	1	0	1	0	0	hsa-miR-593-5p	-0.21	-0.21	N/A
SCNN1B	ENST00000343070.2	sodium channel, non-voltage-gated 1, beta subunit	5	1	0	1	0	0	hsa-miR-593-5p	-0.21	-0.21	N/A
FANCC	ENST00000289081.3	Fanconi anemia, complementation group C	408	2	0	1	1	1	hsa-miR-593-5p	-0.21	-0.26	N/A
MYD88	ENST00000396334.3	myeloid differentiation primary response 88	319	1	0	0	1	0	hsa-miR-593-5p	-0.21	-0.21	N/A
GMIP	ENST00000203556.4	GEM interacting protein	9	1	0	1	0	0	hsa-miR-593-5p	-0.21	-0.21	N/A
DNAJC3	ENST00000602402.1	DnaJ (Hsp40) homolog, subfamily C, member 3	125	3	1	1	1	0	hsa-miR-593-5p	-0.21	-0.25	N/A
GORASP2	ENST00000234160.4	golgi reassembly stacking protein 2, 55kDa	1944	1	0	0	1	0	hsa-miR-593-5p	-0.21	-0.23	N/A
SIPA1L2	ENST00000366630.1	signal-induced proliferation-associated 1 like 2	182	1	0	1	0	0	hsa-miR-593-5p	-0.21	-0.23	N/A
QPCTL	ENST00000012049.5	glutaminyl-peptide cyclotransferase-like	62	2	0	2	0	1	hsa-miR-593-5p	-0.21	-0.3	N/A
TRPS1	ENST00000395715.3	trichorhinophalangeal syndrome I	94	1	0	1	0	0	hsa-miR-593-5p	-0.21	-0.21	N/A
ALDH3B1	ENST00000539229.1	aldehyde dehydrogenase 3 family, member B1	1512	1	0	1	0	0	hsa-miR-593-5p	-0.21	-0.21	N/A
TSR1	ENST00000301364.5	TSR1, 20S rRNA accumulation, homolog (S. cerevisiae)	559	1	0	0	1	0	hsa-miR-593-5p	-0.21	-0.21	N/A
OCRL	ENST00000371113.4	oculocerebrorenal syndrome of Lowe	818	1	1	0	0	0	hsa-miR-593-5p	-0.21	-0.21	N/A
CD93	ENST00000246006.4	CD93 molecule	5	1	0	0	1	0	hsa-miR-593-5p	-0.21	-0.21	N/A
FECH	ENST00000262093.5	ferrochelatase	716	2	1	1	0	1	hsa-miR-593-5p	-0.21	-0.34	N/A
ADAT2	ENST00000606514.1	adenosine deaminase, tRNA-specific 2	303	1	0	0	1	0	hsa-miR-593-5p	-0.21	-0.22	N/A
CEP57L1	ENST00000368968.2	centrosomal protein 57kDa-like 1	90	1	0	1	0	0	hsa-miR-593-5p	-0.21	-0.23	N/A
CA8	ENST00000317995.4	carbonic anhydrase VIII	197	1	0	0	1	0	hsa-miR-593-5p	-0.21	-0.27	N/A
POLR2D	ENST00000272645.4	polymerase (RNA) II (DNA directed) polypeptide D	530	1	0	1	0	0	hsa-miR-593-5p	-0.21	-0.21	N/A
GPR111	ENST00000398742.2	G protein-coupled receptor 111	5	1	0	1	0	0	hsa-miR-593-5p	-0.2	-0.2	N/A
HINFP	ENST00000350777.2	histone H4 transcription factor	410	1	0	1	0	0	hsa-miR-593-5p	-0.2	-0.2	N/A
AL355390.1	ENST00000325811.1	Uncharacterized protein	5	1	0	1	0	1	hsa-miR-593-5p	-0.2	-0.2	N/A
CD40	ENST00000372276.3	CD40 molecule, TNF receptor superfamily member 5	5	1	0	1	0	0	hsa-miR-593-5p	-0.2	-0.2	N/A
GOLGA8M	ENST00000563027.1	golgin A8 family, member M	0	2	0	1	1	1	hsa-miR-593-5p	-0.2	-0.2	N/A
IL17REL	ENST00000389983.2	interleukin 17 receptor E-like	5	1	0	0	1	2	hsa-miR-593-5p	-0.2	-0.2	N/A
AGO2	ENST00000220592.5	argonaute RISC catalytic component 2	350	3	1	1	1	5	hsa-miR-593-5p	-0.2	-3.25	N/A
ATXN1	ENST00000244769.4	ataxin 1	106	1	0	0	1	1	hsa-miR-593-5p	-0.2	-0.22	N/A
KREMEN1	ENST00000400335.4	kringle containing transmembrane protein 1	606	1	1	0	0	1	hsa-miR-593-5p	-0.2	-0.2	N/A
CYP4F3	ENST00000221307.8	cytochrome P450, family 4, subfamily F, polypeptide 3	121	1	1	0	0	1	hsa-miR-593-5p	-0.2	-0.2	N/A
CLEC1A	ENST00000315330.4	C-type lectin domain family 1, member A	5	1	0	0	1	0	hsa-miR-593-5p	-0.2	-0.2	N/A
LHX6	ENST00000373755.2	LIM homeobox 6	196	1	0	1	0	1	hsa-miR-593-5p	-0.2	-0.2	N/A
CNIH4	ENST00000465271.1	cornichon family AMPA receptor auxiliary protein 4	1348	2	1	0	1	1	hsa-miR-593-5p	-0.2	-0.62	N/A
CLASP1	ENST00000409078.3	cytoplasmic linker associated protein 1	210	2	0	1	1	0	hsa-miR-593-5p	-0.2	-0.21	N/A
PLEKHO2	ENST00000323544.4	pleckstrin homology domain containing, family O member 2	279	2	1	0	1	0	hsa-miR-593-5p	-0.2	-0.2	N/A
NUP160	ENST00000378460.2	nucleoporin 160kDa	997	1	0	1	0	0	hsa-miR-593-5p	-0.2	-0.2	N/A
TNFSF14	ENST00000245912.3	tumor necrosis factor (ligand) superfamily, member 14	5	1	0	1	0	1	hsa-miR-593-5p	-0.2	-0.2	N/A
SLC4A5	ENST00000423644.1	solute carrier family 4 (sodium bicarbonate cotransporter), member 5	6	1	1	0	0	0	hsa-miR-593-5p	-0.2	-0.2	N/A
HMGCS1	ENST00000325110.6	3-hydroxy-3-methylglutaryl-CoA synthase 1 (soluble)	3730	1	0	0	1	1	hsa-miR-593-5p	-0.2	-0.27	N/A
STX16	ENST00000355957.5	syntaxin 16	756	1	1	0	0	0	hsa-miR-593-5p	-0.2	-0.27	N/A
SLC24A2	ENST00000341998.2	solute carrier family 24 (sodium/potassium/calcium exchanger), member 2	5	2	0	1	1	0	hsa-miR-593-5p	-0.2	-0.2	N/A
BLOC1S5	ENST00000397457.2	biogenesis of lysosomal organelles complex-1, subunit 5, muted	187	1	0	0	1	0	hsa-miR-593-5p	-0.2	-0.2	N/A
DOLPP1	ENST00000540102.1	dolichyldiphosphatase 1	963	1	0	0	1	0	hsa-miR-593-5p	-0.2	-0.2	N/A
SIL1	ENST00000394817.2	SIL1 nucleotide exchange factor	983	1	0	0	1	0	hsa-miR-593-5p	-0.2	-0.2	N/A
KCNN3	ENST00000271915.4	potassium intermediate/small conductance calcium-activated channel, subfamily N, member 3	5	1	0	0	1	1	hsa-miR-593-5p	-0.2	-0.2	N/A
FBXL12	ENST00000589626.1	F-box and leucine-rich repeat protein 12	27	1	0	1	0	0	hsa-miR-593-5p	-0.2	-0.2	N/A
SLC25A20	ENST00000430379.1	solute carrier family 25 (carnitine/acylcarnitine translocase), member 20	6430	1	0	0	1	0	hsa-miR-593-5p	-0.2	-0.2	N/A
CUL4A	ENST00000326335.4	cullin 4A	4084	1	0	0	1	0	hsa-miR-593-5p	-0.2	-0.2	N/A
SLC47A1	ENST00000270570.4	solute carrier family 47 (multidrug and toxin extrusion), member 1	204	1	1	0	0	2	hsa-miR-593-5p	-0.2	-0.42	N/A
SLC12A6	ENST00000397707.2	solute carrier family 12 (potassium/chloride transporter), member 6	17	1	0	0	1	1	hsa-miR-593-5p	-0.2	-0.4	N/A
ERGIC2	ENST00000360150.4	ERGIC and golgi 2	451	1	0	0	1	1	hsa-miR-593-5p	-0.2	-0.24	N/A
AP5Z1	ENST00000348624.4	adaptor-related protein complex 5, zeta 1 subunit	467	1	0	0	1	1	hsa-miR-593-5p	-0.2	-0.21	N/A
LMX1B	ENST00000355497.5	LIM homeobox transcription factor 1, beta	8	1	0	0	1	1	hsa-miR-593-5p	-0.2	-0.2	N/A
TRAF3IP2	ENST00000368761.5	TRAF3 interacting protein 2	44	1	0	0	1	0	hsa-miR-593-5p	-0.2	-0.2	N/A
PRR18	ENST00000322583.3	proline rich 18	15	1	0	1	0	0	hsa-miR-593-5p	-0.2	-0.2	N/A
CLK3	ENST00000345005.4	CDC-like kinase 3	127	1	0	1	0	0	hsa-miR-593-5p	-0.2	-0.2	N/A
CXCR2	ENST00000318507.2	chemokine (C-X-C motif) receptor 2	5	1	0	1	0	0	hsa-miR-593-5p	-0.2	-0.2	N/A
TRABD	ENST00000303434.4	TraB domain containing	2527	1	0	0	1	1	hsa-miR-593-5p	-0.2	-0.2	N/A
SAMHD1	ENST00000262878.4	SAM domain and HD domain 1	448	1	0	0	1	1	hsa-miR-593-5p	-0.2	-0.24	N/A
ZC2HC1A	ENST00000263849.4	zinc finger, C2HC-type containing 1A	176	1	0	1	0	0	hsa-miR-593-5p	-0.2	-0.3	N/A
GRAMD2	ENST00000309731.7	GRAM domain containing 2	5	1	0	0	1	0	hsa-miR-593-5p	-0.2	-0.2	N/A
GOLGA8O	ENST00000509311.2	golgin A8 family, member O	0	2	0	1	1	1	hsa-miR-593-5p	-0.2	-0.2	N/A
TBX20	ENST00000408931.3	T-box 20	0	1	1	0	0	0	hsa-miR-593-5p	-0.2	-0.2	N/A
AKAP10	ENST00000225737.6	A kinase (PRKA) anchor protein 10	700	1	0	0	1	0	hsa-miR-593-5p	-0.2	-0.2	N/A
PODXL	ENST00000541194.1	podocalyxin-like	2928	1	0	0	1	0	hsa-miR-593-5p	-0.2	-0.21	N/A
GOLM1	ENST00000388712.3	golgi membrane protein 1	4212	1	1	0	0	0	hsa-miR-593-5p	-0.2	-0.21	N/A
DIEXF	ENST00000491415.2	digestive organ expansion factor homolog (zebrafish)	493	1	1	0	0	1	hsa-miR-593-5p	-0.2	-0.29	N/A
OSBPL2	ENST00000358053.2	oxysterol binding protein-like 2	283	2	0	1	1	1	hsa-miR-593-5p	-0.2	-0.27	N/A
GPR15	ENST00000284311.3	G protein-coupled receptor 15	0	1	0	1	0	0	hsa-miR-593-5p	-0.2	-0.2	N/A
TSPEAR	ENST00000323084.4	thrombospondin-type laminin G domain and EAR repeats	5	2	0	1	1	0	hsa-miR-593-5p	-0.2	-0.2	N/A
RASA4B	ENST00000541662.1	RAS p21 protein activator 4B	5	1	0	0	1	0	hsa-miR-593-5p	-0.2	-0.2	N/A
DLL3	ENST00000205143.4	delta-like 3 (Drosophila)	36	1	0	1	0	0	hsa-miR-593-5p	-0.2	-0.2	N/A
SSTR3	ENST00000328544.3	somatostatin receptor 3	5	1	0	0	1	1	hsa-miR-593-5p	-0.2	-0.2	N/A
HNRNPDL	ENST00000602300.1	heterogeneous nuclear ribonucleoprotein D-like	217	1	0	1	0	0	hsa-miR-593-5p	-0.2	-0.25	N/A
USP13	ENST00000263966.3	ubiquitin specific peptidase 13 (isopeptidase T-3)	379	1	1	0	0	0	hsa-miR-593-5p	-0.2	-0.21	N/A
DNAJC27	ENST00000264711.2	DnaJ (Hsp40) homolog, subfamily C, member 27	41	1	1	0	0	0	hsa-miR-593-5p	-0.2	-0.23	N/A
ZSCAN22	ENST00000329665.4	zinc finger and SCAN domain containing 22	45	1	0	1	0	1	hsa-miR-593-5p	-0.2	-0.2	N/A
SUSD3	ENST00000375472.3	sushi domain containing 3	24	1	0	1	0	0	hsa-miR-593-5p	-0.2	-0.2	N/A
PIGN	ENST00000357637.5	phosphatidylinositol glycan anchor biosynthesis, class N	211	1	0	0	1	0	hsa-miR-593-5p	-0.2	-0.2	N/A
SLC2A3	ENST00000075120.7	solute carrier family 2 (facilitated glucose transporter), member 3	5	1	0	1	0	0	hsa-miR-593-5p	-0.2	-0.2	N/A
SLC45A2	ENST00000382102.3	solute carrier family 45, member 2	5	1	1	0	0	0	hsa-miR-593-5p	-0.2	-0.2	N/A
LRRC3C	ENST00000377924.4	leucine rich repeat containing 3C	9	2	0	2	0	0	hsa-miR-593-5p	-0.2	-0.51	N/A
HIGD1A	ENST00000321331.7	HIG1 hypoxia inducible domain family, member 1A	254	1	0	1	0	0	hsa-miR-593-5p	-0.2	-0.23	N/A
UGT8	ENST00000310836.6	UDP glycosyltransferase 8	682	1	0	0	1	0	hsa-miR-593-5p	-0.2	-0.23	N/A
PLCL1	ENST00000428675.1	phospholipase C-like 1	31	1	0	1	0	0	hsa-miR-593-5p	-0.2	-0.2	N/A
MGA	ENST00000219905.7	MGA, MAX dimerization protein	250	2	0	1	1	1	hsa-miR-593-5p	-0.2	-0.4	N/A
GOLGA8H	ENST00000566740.1	golgin A8 family, member H	2	1	0	0	1	1	hsa-miR-593-5p	-0.2	-0.2	N/A
AC025278.1	ENST00000377296.3	Uncharacterized protein	5	1	0	1	0	0	hsa-miR-593-5p	-0.2	-0.2	N/A
MCM4	ENST00000523944.1	minichromosome maintenance complex component 4	1525	1	0	0	1	0	hsa-miR-593-5p	-0.2	-0.24	N/A
ANKRD23	ENST00000318357.4	ankyrin repeat domain 23	9	1	1	0	0	0	hsa-miR-593-5p	-0.2	-0.2	N/A
CBLL1	ENST00000440859.3	Cbl proto-oncogene-like 1, E3 ubiquitin protein ligase	850	1	0	1	0	0	hsa-miR-593-5p	-0.2	-0.24	N/A
ACOT7	ENST00000608083.1	acyl-CoA thioesterase 7	141	1	0	1	0	0	hsa-miR-593-5p	-0.2	-0.2	N/A
GOLGA8R	ENST00000327271.10	golgin A8 family, member R	0	1	0	0	1	1	hsa-miR-593-5p	-0.2	-0.2	N/A
TBR1	ENST00000389554.3	T-box, brain, 1	5	1	0	0	1	0	hsa-miR-593-5p	-0.2	-0.2	N/A
TLL2	ENST00000357947.3	tolloid-like 2	5	1	0	0	1	0	hsa-miR-593-5p	-0.2	-0.2	N/A
NUMBL	ENST00000252891.4	numb homolog (Drosophila)-like	323	1	0	1	0	3	hsa-miR-593-5p	-0.2	-0.27	N/A
NKRF	ENST00000371527.1	NFKB repressing factor	607	2	0	2	0	0	hsa-miR-593-5p	-0.2	-0.43	N/A
ODF2L	ENST00000359242.3	outer dense fiber of sperm tails 2-like	164	1	1	0	0	0	hsa-miR-593-5p	-0.2	-0.23	N/A
CCP110	ENST00000381396.5	centriolar coiled coil protein 110kDa	226	1	0	0	1	0	hsa-miR-593-5p	-0.2	-0.21	N/A
NALCN	ENST00000251127.6	sodium leak channel, non-selective	5	1	0	1	0	0	hsa-miR-593-5p	-0.2	-0.2	N/A
ARHGEF17	ENST00000263674.3	Rho guanine nucleotide exchange factor (GEF) 17	729	1	0	1	0	0	hsa-miR-593-5p	-0.2	-0.2	N/A
DIRAS2	ENST00000375765.3	DIRAS family, GTP-binding RAS-like 2	5	1	0	0	1	1	hsa-miR-593-5p	-0.2	-0.2	N/A
MAB21L3	ENST00000369500.3	mab-21-like 3 (C. elegans)	5	1	0	0	1	0	hsa-miR-593-5p	-0.2	-0.2	N/A
HOXA1	ENST00000355633.5	homeobox A1	157	1	0	0	1	0	hsa-miR-593-5p	-0.2	-0.2	N/A
ERCC4	ENST00000311895.7	excision repair cross-complementing rodent repair deficiency, complementation group 4	261	1	0	1	0	0	hsa-miR-593-5p	-0.2	-0.2	N/A
TBC1D22A	ENST00000337137.4	TBC1 domain family, member 22A	123	2*	0	0	1	0	hsa-miR-593-5p	-0.2	-0.2	N/A
MDGA1	ENST00000297153.7	MAM domain containing glycosylphosphatidylinositol anchor 1	240	4	0	2	2	3	hsa-miR-593-5p	-0.2	-0.2	N/A
AMD1	ENST00000368885.3	adenosylmethionine decarboxylase 1	725	1	1	0	0	0	hsa-miR-593-5p	-0.2	-0.45	N/A
S100PBP	ENST00000373475.5	S100P binding protein	428	1	0	1	0	0	hsa-miR-593-5p	-0.2	-0.23	N/A
CD300LB	ENST00000392621.1	CD300 molecule-like family member b	5	2	1	0	1	0	hsa-miR-593-5p	-0.2	-0.48	N/A
HADH	ENST00000403312.1	hydroxyacyl-CoA dehydrogenase	1894	1	0	1	0	0	hsa-miR-593-5p	-0.2	-0.24	N/A
PARM1	ENST00000513238.1	prostate androgen-regulated mucin-like protein 1	161	1	1	0	0	0	hsa-miR-593-5p	-0.2	-0.31	N/A
HDAC8	ENST00000439122.2	histone deacetylase 8	24	1	0	1	0	0	hsa-miR-593-5p	-0.2	-0.2	N/A
SLC25A48	ENST00000425402.1	solute carrier family 25, member 48	5	1	0	1	0	0	hsa-miR-593-5p	-0.2	-0.2	N/A
SLC5A12	ENST00000396005.3	solute carrier family 5 (sodium/monocarboxylate cotransporter), member 12	8	1	0	1	0	0	hsa-miR-593-5p	-0.2	-0.2	N/A
TXNRD2	ENST00000535882.1	thioredoxin reductase 2	148	1	1	0	0	0	hsa-miR-593-5p	-0.2	-0.2	N/A
KCNK3	ENST00000302909.3	potassium channel, subfamily K, member 3	19	2	1	1	0	3	hsa-miR-593-5p	-0.2	-0.27	N/A
GNA11	ENST00000078429.4	guanine nucleotide binding protein (G protein), alpha 11 (Gq class)	1513	1	1	0	0	2	hsa-miR-593-5p	-0.2	-0.2	N/A
GPER1	ENST00000397092.1	G protein-coupled estrogen receptor 1	284	2	0	0	2	0	hsa-miR-593-5p	-0.19	-0.37	N/A
SDHC	ENST00000367975.2	succinate dehydrogenase complex, subunit C, integral membrane protein, 15kDa	172	1	0	0	1	0	hsa-miR-593-5p	-0.19	-0.19	N/A
POMT2	ENST00000261534.4	protein-O-mannosyltransferase 2	526	1	0	0	1	0	hsa-miR-593-5p	-0.19	-0.19	N/A
RGSL1	ENST00000294854.8	regulator of G-protein signaling like 1	5	1	0	0	1	0	hsa-miR-593-5p	-0.19	-0.19	N/A
ATCAY	ENST00000450849.2	ataxia, cerebellar, Cayman type	5	1	0	0	1	2	hsa-miR-593-5p	-0.19	-0.19	N/A
GOSR1	ENST00000225724.5	golgi SNAP receptor complex member 1	668	1	0	1	0	1	hsa-miR-593-5p	-0.19	-0.19	N/A
HES6	ENST00000409574.1	hairy and enhancer of split 6 (Drosophila)	3170	1	0	1	0	0	hsa-miR-593-5p	-0.19	-0.19	N/A
DMRT2	ENST00000259622.6	doublesex and mab-3 related transcription factor 2	5	1	0	1	0	0	hsa-miR-593-5p	-0.19	-0.19	N/A
ARSG	ENST00000448504.2	arylsulfatase G	73	1	0	0	1	0	hsa-miR-593-5p	-0.19	-0.19	N/A
PLA2G2D	ENST00000375105.3	phospholipase A2, group IID	5	1	0	1	0	1	hsa-miR-593-5p	-0.19	-0.19	N/A
CASP10	ENST00000286186.6	caspase 10, apoptosis-related cysteine peptidase	55	1	0	1	0	0	hsa-miR-593-5p	-0.19	-0.19	N/A
DRP2	ENST00000402866.1	dystrophin related protein 2	5	1	0	0	1	0	hsa-miR-593-5p	-0.19	-0.19	N/A
TRAM2	ENST00000182527.3	translocation associated membrane protein 2	2774	3	0	3	0	1	hsa-miR-593-5p	-0.19	-0.19	N/A
ZNF384	ENST00000319770.3	zinc finger protein 384	8	1	0	0	1	0	hsa-miR-593-5p	-0.19	-0.19	N/A
SMO	ENST00000249373.3	smoothened, frizzled family receptor	142	1	0	0	1	1	hsa-miR-593-5p	-0.19	-0.19	N/A
RNF215	ENST00000382363.3	ring finger protein 215	207	1	0	1	0	0	hsa-miR-593-5p	-0.19	-0.19	N/A
SGTA	ENST00000221566.2	small glutamine-rich tetratricopeptide repeat (TPR)-containing, alpha	250	1	0	0	1	0	hsa-miR-593-5p	-0.19	-0.19	N/A
NUTM2D	ENST00000412718.1	NUT family member 2D	5	1	0	0	1	1	hsa-miR-593-5p	-0.19	-0.19	N/A
TMEM200B	ENST00000521452.1	transmembrane protein 200B	152	1	0	0	1	0	hsa-miR-593-5p	-0.19	-0.19	N/A
TBC1D28	ENST00000345096.4	TBC1 domain family, member 28	5	1	0	1	0	2	hsa-miR-593-5p	-0.19	-0.19	N/A
RALGDS	ENST00000372050.3	ral guanine nucleotide dissociation stimulator	143	1	0	1	0	1	hsa-miR-593-5p	-0.19	-0.19	N/A
DGCR2	ENST00000545799.1	DiGeorge syndrome critical region gene 2	1754	1	0	0	1	1	hsa-miR-593-5p	-0.19	-0.21	N/A
SDC4	ENST00000372733.3	syndecan 4	1252	1	0	1	0	1	hsa-miR-593-5p	-0.19	-0.32	N/A
SCARB1	ENST00000339570.5	scavenger receptor class B, member 1	186	1	0	1	0	1	hsa-miR-593-5p	-0.19	-0.2	N/A
CPNE5	ENST00000244751.2	copine V	13	1	0	1	0	1	hsa-miR-593-5p	-0.19	-0.19	N/A
EREG	ENST00000244869.2	epiregulin	5	1	0	0	1	0	hsa-miR-593-5p	-0.19	-0.19	N/A
CDC14A	ENST00000370125.2	cell division cycle 14A	123	1	0	0	1	0	hsa-miR-593-5p	-0.19	-0.19	N/A
TSSK6	ENST00000360913.3	testis-specific serine kinase 6	5	1	0	0	1	0	hsa-miR-593-5p	-0.19	-0.19	N/A
AIFM3	ENST00000399167.2	apoptosis-inducing factor, mitochondrion-associated, 3	16	1	0	0	1	0	hsa-miR-593-5p	-0.19	-0.19	N/A
SGIP1	ENST00000371036.3	SH3-domain GRB2-like (endophilin) interacting protein 1	180	1	0	0	1	0	hsa-miR-593-5p	-0.19	-0.19	N/A
MAP2K7	ENST00000397981.3	mitogen-activated protein kinase kinase 7	164	1	0	0	1	2	hsa-miR-593-5p	-0.19	-0.19	N/A
GOLGA8N	ENST00000448387.2	golgin A8 family, member N	0	2	0	1	1	1	hsa-miR-593-5p	-0.19	-0.19	N/A
GBA	ENST00000368373.3	glucosidase, beta, acid	27	1	1	0	0	1	hsa-miR-593-5p	-0.19	-0.19	N/A
PLEKHH2	ENST00000282406.4	pleckstrin homology domain containing, family H (with MyTH4 domain) member 2	9	1	1	0	0	0	hsa-miR-593-5p	-0.19	-0.19	N/A
MORC2	ENST00000397641.3	MORC family CW-type zinc finger 2	216	1	1	0	0	1	hsa-miR-593-5p	-0.19	-0.27	N/A
PIK3R3	ENST00000262741.5	phosphoinositide-3-kinase, regulatory subunit 3 (gamma)	335	1	0	1	0	1	hsa-miR-593-5p	-0.19	-0.26	N/A
GATAD2A	ENST00000360315.3	GATA zinc finger domain containing 2A	986	2	1	1	0	1	hsa-miR-593-5p	-0.19	-0.19	N/A
RHBDF2	ENST00000389760.4	rhomboid 5 homolog 2 (Drosophila)	228	1	0	1	0	2	hsa-miR-593-5p	-0.19	-0.19	N/A
CCDC88C	ENST00000389857.6	coiled-coil domain containing 88C	42	1	0	0	1	0	hsa-miR-593-5p	-0.19	-0.19	N/A
SEC24D	ENST00000429811.2	SEC24 family, member D (S. cerevisiae)	50	1	0	1	0	0	hsa-miR-593-5p	-0.19	-0.19	N/A
C12orf54	ENST00000314014.2	chromosome 12 open reading frame 54	5	1	0	1	0	0	hsa-miR-593-5p	-0.19	-0.19	N/A
BFAR	ENST00000261658.2	bifunctional apoptosis regulator	376	1	0	0	1	0	hsa-miR-593-5p	-0.19	-0.2	N/A
ZNF592	ENST00000299927.3	zinc finger protein 592	1128	2	0	2	0	1	hsa-miR-593-5p	-0.19	-0.22	N/A
TLR3	ENST00000296795.3	toll-like receptor 3	5	1	0	0	1	2	hsa-miR-593-5p	-0.19	-0.3	N/A
C22orf34	ENST00000400023.1	chromosome 22 open reading frame 34	5	1	0	0	1	0	hsa-miR-593-5p	-0.19	-0.19	N/A
TMEM132E	ENST00000321639.5	transmembrane protein 132E	461	1	1	0	0	1	hsa-miR-593-5p	-0.19	-0.19	N/A
GRAMD1B	ENST00000529750.1	GRAM domain containing 1B	35	2	0	0	2	0	hsa-miR-593-5p	-0.19	-0.33	N/A
GOLGA8K	ENST00000512626.2	golgin A8 family, member K	0	1	0	0	1	1	hsa-miR-593-5p	-0.19	-0.19	N/A
ZNF844	ENST00000439326.3	zinc finger protein 844	11	1	0	0	1	1	hsa-miR-593-5p	-0.19	-0.19	N/A
TMEM63A	ENST00000366835.3	transmembrane protein 63A	117	1	0	0	1	1	hsa-miR-593-5p	-0.19	-0.27	N/A
CLCN2	ENST00000423355.2	chloride channel, voltage-sensitive 2	44	1	0	0	1	0	hsa-miR-593-5p	-0.19	-0.19	N/A
KCNQ4	ENST00000347132.5	potassium voltage-gated channel, KQT-like subfamily, member 4	46	2	0	1	1	1	hsa-miR-593-5p	-0.19	-0.19	N/A
TOX2	ENST00000372999.1	TOX high mobility group box family member 2	21	1	0	1	0	0	hsa-miR-593-5p	-0.19	-0.19	N/A
UGT3A2	ENST00000282507.3	UDP glycosyltransferase 3 family, polypeptide A2	5	1	0	1	0	0	hsa-miR-593-5p	-0.19	-0.19	N/A
PI4K2A	ENST00000370649.3	Phosphatidylinositol 4-kinase type 2-alpha; Uncharacterized protein	1489	1	0	0	1	0	hsa-miR-593-5p	-0.19	-0.19	N/A
PLIN1	ENST00000300055.5	perilipin 1	10	1	0	0	1	0	hsa-miR-593-5p	-0.19	-0.19	N/A
C10orf25	ENST00000298298.1	chromosome 10 open reading frame 25	29	1	0	0	1	1	hsa-miR-593-5p	-0.19	-0.23	N/A
APPL1	ENST00000288266.3	adaptor protein, phosphotyrosine interaction, PH domain and leucine zipper containing 1	908	1	1	0	0	0	hsa-miR-593-5p	-0.19	-0.2	N/A
PRRC2C	ENST00000367742.3	proline-rich coiled-coil 2C	5	1	0	0	1	0	hsa-miR-593-5p	-0.19	-0.19	N/A
NCKAP1	ENST00000361354.4	NCK-associated protein 1	700	1	0	1	0	0	hsa-miR-593-5p	-0.19	-0.19	N/A
ZC3H3	ENST00000262577.5	zinc finger CCCH-type containing 3	35	1	0	0	1	0	hsa-miR-593-5p	-0.19	-0.19	N/A
CUL5	ENST00000393094.2	cullin 5	761	1	0	1	0	1	hsa-miR-593-5p	-0.19	-0.2	N/A
PI4K2A	ENST00000370631.3	phosphatidylinositol 4-kinase type 2 alpha	1489	1	0	0	1	0	hsa-miR-593-5p	-0.19	-0.19	N/A
ZNF549	ENST00000602149.1	zinc finger protein 549	7	2	0	2	0	0	hsa-miR-593-5p	-0.19	-0.21	N/A
TSPAN3	ENST00000267970.4	tetraspanin 3	9328	1	0	1	0	0	hsa-miR-593-5p	-0.19	-0.19	N/A
CACNA2D2	ENST00000423994.2	calcium channel, voltage-dependent, alpha 2/delta subunit 2	19	4*	2	0	1	0	hsa-miR-593-5p	-0.19	-0.31	N/A
CALN1	ENST00000329008.5	calneuron 1	5	1	0	0	1	1	hsa-miR-593-5p	-0.19	-0.19	N/A
C9orf163	ENST00000354376.1	chromosome 9 open reading frame 163	17	1	0	1	0	0	hsa-miR-593-5p	-0.19	-0.19	N/A
COL4A6	ENST00000334504.7	collagen, type IV, alpha 6	37	1	0	0	1	0	hsa-miR-593-5p	-0.19	-0.19	N/A
RRAGC	ENST00000373001.3	Ras-related GTP binding C	1062	1	0	1	0	0	hsa-miR-593-5p	-0.19	-0.19	N/A
IRAK4	ENST00000431837.1	interleukin-1 receptor-associated kinase 4	223	1	0	1	0	1	hsa-miR-593-5p	-0.19	-0.2	N/A
ZNF587	ENST00000339656.5	zinc finger protein 587	52	2	1	0	1	1	hsa-miR-593-5p	-0.19	-0.24	N/A
LY6K	ENST00000522591.1	lymphocyte antigen 6 complex, locus K	2718	1	0	1	0	1	hsa-miR-593-5p	-0.19	-0.25	N/A
ITGA9	ENST00000264741.5	integrin, alpha 9	9	1	0	0	1	0	hsa-miR-593-5p	-0.19	-0.19	N/A
PABPC1L2B	ENST00000373521.2	poly(A) binding protein, cytoplasmic 1-like 2B	5	1	0	1	0	0	hsa-miR-593-5p	-0.19	-0.19	N/A
FITM2	ENST00000396825.3	fat storage-inducing transmembrane protein 2	215	1	0	0	1	0	hsa-miR-593-5p	-0.19	-0.27	N/A
FGD5	ENST00000285046.5	FYVE, RhoGEF and PH domain containing 5	9	1	0	1	0	0	hsa-miR-593-5p	-0.19	-0.19	N/A
TMCO3	ENST00000434316.2	transmembrane and coiled-coil domains 3	3482	1	0	1	0	0	hsa-miR-593-5p	-0.19	-0.19	N/A
C17orf102	ENST00000357754.1	chromosome 17 open reading frame 102	5	1	0	1	0	1	hsa-miR-593-5p	-0.19	-0.19	N/A
FER	ENST00000281092.4	fer (fps/fes related) tyrosine kinase	665	1	0	1	0	2	hsa-miR-593-5p	-0.19	-0.19	N/A
RPS27A	ENST00000272317.6	ribosomal protein S27a	179	1	0	0	1	1	hsa-miR-593-5p	-0.19	-0.41	N/A
C6orf89	ENST00000480824.2	chromosome 6 open reading frame 89	1972	3	0	2	1	1	hsa-miR-593-5p	-0.19	-0.21	N/A
PABPC1L2A	ENST00000373519.1	poly(A) binding protein, cytoplasmic 1-like 2A	5	1	0	1	0	0	hsa-miR-593-5p	-0.18	-0.18	N/A
C1orf64	ENST00000329454.2	chromosome 1 open reading frame 64	5	1	0	1	0	0	hsa-miR-593-5p	-0.18	-0.18	N/A
TMEM239	ENST00000361033.1	transmembrane protein 239	5	1	0	0	1	0	hsa-miR-593-5p	-0.18	-0.18	N/A
C10orf67	ENST00000323327.4	chromosome 10 open reading frame 67	5	1	0	0	1	0	hsa-miR-593-5p	-0.18	-0.18	N/A
NAA40	ENST00000377793.4	N(alpha)-acetyltransferase 40, NatD catalytic subunit	217	1	1	0	0	0	hsa-miR-593-5p	-0.18	-0.29	N/A
SNX5	ENST00000377759.4	sorting nexin 5	715	1	0	0	1	0	hsa-miR-593-5p	-0.18	-0.19	N/A
TBC1D16	ENST00000310924.2	TBC1 domain family, member 16	556	3	0	0	3	1	hsa-miR-593-5p	-0.18	-0.42	N/A
C15orf38-AP3S2	ENST00000398333.3	C15orf38-AP3S2 readthrough	985	2	0	0	2	1	hsa-miR-593-5p	-0.18	-0.29	N/A
PRKCA	ENST00000413366.3	protein kinase C, alpha	726	2	0	0	2	1	hsa-miR-593-5p	-0.18	-0.24	N/A
GLP1R	ENST00000373256.4	glucagon-like peptide 1 receptor	5	1	0	1	0	0	hsa-miR-593-5p	-0.18	-0.18	N/A
PGAP3	ENST00000579146.1	post-GPI attachment to proteins 3	6	1	0	1	0	0	hsa-miR-593-5p	-0.18	-0.18	N/A
HELZ2	ENST00000427522.2	helicase with zinc finger 2, transcriptional coactivator	692	1	0	0	1	1	hsa-miR-593-5p	-0.18	-0.18	N/A
KIAA1875	ENST00000323662.8	KIAA1875	5	1	1	0	0	0	hsa-miR-593-5p	-0.18	-0.18	N/A
AL590483.1	ENST00000598000.1	Uncharacterized protein; cDNA FLJ42623 fis, clone BRACE3015894	5	1	0	0	1	0	hsa-miR-593-5p	-0.18	-0.18	N/A
SNX11	ENST00000393405.2	sorting nexin 11	20	1	0	0	1	0	hsa-miR-593-5p	-0.18	-0.26	N/A
P2RY2	ENST00000311131.2	purinergic receptor P2Y, G-protein coupled, 2	66	2	0	1	1	1	hsa-miR-593-5p	-0.18	-0.26	N/A
TRIM71	ENST00000383763.5	tripartite motif containing 71, E3 ubiquitin protein ligase	67	1	1	0	0	0	hsa-miR-593-5p	-0.18	-0.28	N/A
AGPAT6	ENST00000396987.3	1-acylglycerol-3-phosphate O-acyltransferase 6	474	3	0	1	2	0	hsa-miR-593-5p	-0.18	-0.38	N/A
HM13	ENST00000335574.5	histocompatibility (minor) 13	4848	2	0	2	0	1	hsa-miR-593-5p	-0.18	-0.31	N/A
SALL4	ENST00000217086.4	sal-like 4 (Drosophila)	155	1	0	0	1	0	hsa-miR-593-5p	-0.18	-0.19	N/A
PPM1F	ENST00000263212.5	protein phosphatase, Mg2+/Mn2+ dependent, 1F	786	2	1	1	0	3	hsa-miR-593-5p	-0.18	-0.23	N/A
MAP3K12	ENST00000267079.2	mitogen-activated protein kinase kinase kinase 12	61	1	0	1	0	0	hsa-miR-593-5p	-0.18	-0.23	N/A
OMP	ENST00000529803.1	olfactory marker protein	9	1	0	1	0	0	hsa-miR-593-5p	-0.18	-0.18	N/A
FAM47E	ENST00000515604.1	Protein FAM47E	503	1	0	1	0	0	hsa-miR-593-5p	-0.18	-0.18	N/A
GOLGA8I	ENST00000450802.3	golgin A8 family, member I	5	1	0	0	1	1	hsa-miR-593-5p	-0.18	-0.18	N/A
MSTO1	ENST00000245564.2	misato 1, mitochondrial distribution and morphology regulator	136	1	0	0	1	0	hsa-miR-593-5p	-0.18	-0.18	N/A
PATZ1	ENST00000215919.3	POZ (BTB) and AT hook containing zinc finger 1	210	1	0	1	0	0	hsa-miR-593-5p	-0.18	-0.18	N/A
RAD54B	ENST00000297592.5	RAD54 homolog B (S. cerevisiae)	36	1	0	1	0	0	hsa-miR-593-5p	-0.18	-0.23	N/A
KBTBD13	ENST00000432196.2	kelch repeat and BTB (POZ) domain containing 13	5	1	0	1	0	0	hsa-miR-593-5p	-0.18	-0.18	N/A
DCK	ENST00000504730.1	deoxycytidine kinase	200	1	0	1	0	0	hsa-miR-593-5p	-0.18	-0.22	N/A
MAPK13	ENST00000211287.4	mitogen-activated protein kinase 13	499	1	1	0	0	1	hsa-miR-593-5p	-0.18	-0.19	N/A
ZNF283	ENST00000324461.7	zinc finger protein 283	194	3	0	2	1	1	hsa-miR-593-5p	-0.18	-0.59	N/A
EPHB2	ENST00000374632.3	EPH receptor B2	297	2	0	1	1	0	hsa-miR-593-5p	-0.18	-0.18	N/A
TUB	ENST00000305253.4	tubby bipartite transcription factor	743	1	1	0	0	1	hsa-miR-593-5p	-0.18	-0.18	N/A
YKT6	ENST00000223369.2	YKT6 v-SNARE homolog (S. cerevisiae)	2409	2	0	1	1	0	hsa-miR-593-5p	-0.18	-0.18	N/A
GAS7	ENST00000437099.2	growth arrest-specific 7	186	1	0	0	1	1	hsa-miR-593-5p	-0.18	-0.18	N/A
THEM6	ENST00000336138.3	thioesterase superfamily member 6	1500	1	0	1	0	1	hsa-miR-593-5p	-0.18	-0.18	N/A
RRBP1	ENST00000377813.1	ribosome binding protein 1	1290	1	0	1	0	0	hsa-miR-593-5p	-0.18	-0.19	N/A
GALNT2	ENST00000366672.4	UDP-N-acetyl-alpha-D-galactosamine:polypeptide N-acetylgalactosaminyltransferase 2 (GalNAc-T2)	2834	2	0	1	1	2	hsa-miR-593-5p	-0.18	-0.22	N/A
P2RX6	ENST00000413302.2	purinergic receptor P2X, ligand-gated ion channel, 6	10	1	1	0	0	1	hsa-miR-593-5p	-0.18	-0.4	N/A
FGFR1	ENST00000397091.5	fibroblast growth factor receptor 1	650	1	1	0	0	1	hsa-miR-593-5p	-0.18	-0.19	N/A
MPZ	ENST00000533357.1	myelin protein zero	17	1	0	1	0	0	hsa-miR-593-5p	-0.18	-0.18	N/A
GYS1	ENST00000323798.3	glycogen synthase 1 (muscle)	100	1	1	0	0	0	hsa-miR-593-5p	-0.18	-0.18	N/A
CISH	ENST00000443053.2	cytokine inducible SH2-containing protein	19	1	0	1	0	1	hsa-miR-593-5p	-0.18	-0.18	N/A
SEPT9	ENST00000431235.2	septin 9	7738	1	0	0	1	0	hsa-miR-593-5p	-0.18	-0.18	N/A
SLC25A53	ENST00000357421.4	solute carrier family 25, member 53	15	1	0	0	1	0	hsa-miR-593-5p	-0.18	-0.18	N/A
ECT2	ENST00000232458.5	epithelial cell transforming sequence 2 oncogene	220	1	0	0	1	0	hsa-miR-593-5p	-0.18	-0.18	N/A
SPIN2A	ENST00000374908.1	spindlin family, member 2A	5	1	0	1	0	0	hsa-miR-593-5p	-0.18	-0.18	N/A
CDK6	ENST00000265734.4	cyclin-dependent kinase 6	1116	2	0	2	0	2	hsa-miR-593-5p	-0.18	-0.19	N/A
ADPRHL2	ENST00000373178.4	ADP-ribosylhydrolase like 2	160	1	0	1	0	0	hsa-miR-593-5p	-0.18	-0.18	N/A
ARHGEF40	ENST00000298694.4	Rho guanine nucleotide exchange factor (GEF) 40	383	1	0	1	0	0	hsa-miR-593-5p	-0.18	-0.18	N/A
CMKLR1	ENST00000312143.7	chemokine-like receptor 1	5	1	1	0	0	1	hsa-miR-593-5p	-0.18	-0.18	N/A
FAM65A	ENST00000428437.2	family with sequence similarity 65, member A	36	1	0	1	0	0	hsa-miR-593-5p	-0.18	-0.18	N/A
ST8SIA5	ENST00000315087.7	ST8 alpha-N-acetyl-neuraminide alpha-2,8-sialyltransferase 5	7	1	0	1	0	0	hsa-miR-593-5p	-0.18	-0.18	N/A
CYB5D2	ENST00000301391.3	cytochrome b5 domain containing 2	668	1	0	1	0	0	hsa-miR-593-5p	-0.18	-0.18	N/A
PCSK9	ENST00000302118.5	proprotein convertase subtilisin/kexin type 9	2345	1	0	0	1	2	hsa-miR-593-5p	-0.18	-0.22	N/A
WBSCR27	ENST00000297873.4	Williams Beuren syndrome chromosome region 27	17	2	2	0	0	1	hsa-miR-593-5p	-0.18	-0.82	N/A
PCYT2	ENST00000538936.2	phosphate cytidylyltransferase 2, ethanolamine	2340	2	1	0	1	1	hsa-miR-593-5p	-0.18	-0.48	N/A
FRMPD4	ENST00000380682.1	FERM and PDZ domain containing 4	25	1	0	0	1	0	hsa-miR-593-5p	-0.18	-0.18	N/A
DENND4B	ENST00000361217.4	DENN/MADD domain containing 4B	167	1	0	1	0	0	hsa-miR-593-5p	-0.18	-0.18	N/A
UBL4B	ENST00000334179.3	ubiquitin-like 4B	5	1	0	0	1	0	hsa-miR-593-5p	-0.18	-0.18	N/A
C9orf47	ENST00000375851.2	chromosome 9 open reading frame 47	5	1	0	1	0	0	hsa-miR-593-5p	-0.18	-0.18	N/A
FAM83F	ENST00000333407.6	family with sequence similarity 83, member F	5	2	0	1	1	4	hsa-miR-593-5p	-0.18	-0.18	N/A
HMHA1	ENST00000313093.2	histocompatibility (minor) HA-1	35	1	0	1	0	0	hsa-miR-593-5p	-0.18	-0.18	N/A
RP11-382J12.1	ENST00000499227.2	Uncharacterized protein	5	1	0	0	1	0	hsa-miR-593-5p	-0.18	-0.18	N/A
SLC29A2	ENST00000311161.7	solute carrier family 29 (equilibrative nucleoside transporter), member 2	198	1	0	0	1	0	hsa-miR-593-5p	-0.18	-0.18	N/A
STK17B	ENST00000263955.4	serine/threonine kinase 17b	113	1	0	0	1	0	hsa-miR-593-5p	-0.18	-0.23	N/A
UBR7	ENST00000013070.6	ubiquitin protein ligase E3 component n-recognin 7 (putative)	468	1	0	1	0	0	hsa-miR-593-5p	-0.18	-0.19	N/A
CD164	ENST00000368961.5	CD164 molecule, sialomucin	2038	1	1	0	0	0	hsa-miR-593-5p	-0.18	-0.46	N/A
GPR124	ENST00000315215.7	G protein-coupled receptor 124	72	1	0	1	0	2	hsa-miR-593-5p	-0.18	-0.18	N/A
PDGFRB	ENST00000261799.4	platelet-derived growth factor receptor, beta polypeptide	320	1	0	0	1	0	hsa-miR-593-5p	-0.18	-0.18	N/A
PDE8B	ENST00000264917.5	phosphodiesterase 8B	186	1	0	1	0	1	hsa-miR-593-5p	-0.18	-0.18	N/A
SMAD9	ENST00000399275.2	SMAD family member 9	62	1	0	1	0	0	hsa-miR-593-5p	-0.18	-0.18	N/A
STARD3	ENST00000336308.5	StAR-related lipid transfer (START) domain containing 3	35	1	0	0	1	0	hsa-miR-593-5p	-0.18	-0.18	N/A
LGR5	ENST00000266674.5	leucine-rich repeat containing G protein-coupled receptor 5	137	1	0	1	0	0	hsa-miR-593-5p	-0.18	-0.18	N/A
BIRC2	ENST00000227758.2	baculoviral IAP repeat containing 2	36	1	0	1	0	0	hsa-miR-593-5p	-0.18	-0.18	N/A
SMUG1	ENST00000505128.1	single-strand-selective monofunctional uracil-DNA glycosylase 1	242	2*	0	1	0	2	hsa-miR-593-5p	-0.18	-0.21	N/A
RASSF2	ENST00000379400.3	Ras association (RalGDS/AF-6) domain family member 2	88	1	0	1	0	2	hsa-miR-593-5p	-0.18	-0.18	N/A
G6PC	ENST00000253801.2	glucose-6-phosphatase, catalytic subunit	5	1	0	0	1	0	hsa-miR-593-5p	-0.18	-0.18	N/A
GTF2I	ENST00000416070.1	general transcription factor IIi	5	1	0	0	1	0	hsa-miR-593-5p	-0.18	-0.18	N/A
FAM46B	ENST00000289166.5	family with sequence similarity 46, member B	18	1	0	0	1	0	hsa-miR-593-5p	-0.18	-0.18	N/A
DPP4	ENST00000360534.3	dipeptidyl-peptidase 4	49	1	0	0	1	0	hsa-miR-593-5p	-0.18	-0.18	N/A
SEMA6B	ENST00000301293.3	sema domain, transmembrane domain (TM), and cytoplasmic domain, (semaphorin) 6B	35	1	0	0	1	1	hsa-miR-593-5p	-0.18	-0.18	N/A
TMEM125	ENST00000439858.1	transmembrane protein 125	5	1	0	1	0	0	hsa-miR-593-5p	-0.18	-0.18	N/A
CYB5R3	ENST00000361740.4	cytochrome b5 reductase 3	542	1	0	0	1	0	hsa-miR-593-5p	-0.18	-0.18	N/A
CLASP2	ENST00000539981.1	cytoplasmic linker associated protein 2	554	1	1	0	0	0	hsa-miR-593-5p	-0.18	-0.22	N/A
ARL6IP4	ENST00000392435.2	ADP-ribosylation-like factor 6 interacting protein 4	1797	1	0	0	1	0	hsa-miR-593-5p	-0.18	-0.18	N/A
PDPK1	ENST00000441549.3	3-phosphoinositide dependent protein kinase-1	104	2*	0	0	1	2	hsa-miR-593-5p	-0.18	-0.19	N/A
WRN	ENST00000298139.5	Werner syndrome, RecQ helicase-like	560	1	0	0	1	0	hsa-miR-593-5p	-0.18	-0.2	N/A
IKZF2	ENST00000457361.1	IKAROS family zinc finger 2 (Helios)	32	1	0	1	0	0	hsa-miR-593-5p	-0.18	-0.2	N/A
SETD5	ENST00000402198.1	SET domain containing 5	48	1	0	0	1	1	hsa-miR-593-5p	-0.18	-0.19	N/A
MPZL1	ENST00000474859.1	myelin protein zero-like 1	3146	1	0	1	0	1	hsa-miR-593-5p	-0.18	-0.19	N/A
METRNL	ENST00000320095.7	meteorin, glial cell differentiation regulator-like	353	1	0	0	1	1	hsa-miR-593-5p	-0.18	-0.4	N/A
ZFYVE27	ENST00000393677.4	zinc finger, FYVE domain containing 27	565	1	0	0	1	0	hsa-miR-593-5p	-0.18	-0.18	N/A
RP4-758J18.2	ENST00000444362.1	HCG20425, isoform CRA_a; Uncharacterized protein; cDNA FLJ53815	283	1	0	1	0	0	hsa-miR-593-5p	-0.18	-0.18	N/A
CAMK2A	ENST00000348628.6	calcium/calmodulin-dependent protein kinase II alpha	5	2	1	1	0	2	hsa-miR-593-5p	-0.18	-0.18	N/A
VRTN	ENST00000256362.4	vertebrae development associated	5	1	0	0	1	0	hsa-miR-593-5p	-0.18	-0.18	N/A
RPL36	ENST00000347512.3	ribosomal protein L36	1323	1	0	1	0	0	hsa-miR-593-5p	-0.18	-0.27	N/A
RP11-644F5.10	ENST00000550412.1	Uncharacterized protein	265	1	0	1	0	0	hsa-miR-593-5p	-0.18	-0.2	N/A
KCNH5	ENST00000322893.7	potassium voltage-gated channel, subfamily H (eag-related), member 5	157	1	0	1	0	1	hsa-miR-593-5p	-0.18	-0.24	N/A
RAD51	ENST00000423169.2	RAD51 recombinase	838	1	0	1	0	0	hsa-miR-593-5p	-0.18	-0.31	N/A
RAB15	ENST00000436278.2	RAB15, member RAS oncogene family	23	1	0	0	1	0	hsa-miR-593-5p	-0.17	-0.23	N/A
SUV39H1	ENST00000376687.3	suppressor of variegation 3-9 homolog 1 (Drosophila)	499	1	0	0	1	0	hsa-miR-593-5p	-0.17	-0.17	N/A
SSR3	ENST00000476217.1	signal sequence receptor, gamma (translocon-associated protein gamma)	6034	1	0	0	1	0	hsa-miR-593-5p	-0.17	-0.21	N/A
MIB1	ENST00000261537.6	mindbomb E3 ubiquitin protein ligase 1	897	1	0	1	0	0	hsa-miR-593-5p	-0.17	-0.18	N/A
GOLGA6C	ENST00000300576.5	golgin A6 family, member C	0	1	1	0	0	0	hsa-miR-593-5p	-0.17	-0.17	N/A
SLC12A9	ENST00000354161.3	solute carrier family 12, member 9	228	1	0	1	0	0	hsa-miR-593-5p	-0.17	-0.17	N/A
NHSL1	ENST00000427025.2	NHS-like 1	393	1	0	1	0	0	hsa-miR-593-5p	-0.17	-0.17	N/A
GREB1	ENST00000381486.2	growth regulation by estrogen in breast cancer 1	40	1	0	0	1	0	hsa-miR-593-5p	-0.17	-0.17	N/A
ALAD	ENST00000409155.3	aminolevulinate dehydratase	1922	1	0	0	1	0	hsa-miR-593-5p	-0.17	-0.18	N/A
CWF19L1	ENST00000354105.4	CWF19-like 1, cell cycle control (S. pombe)	31	1	1	0	0	0	hsa-miR-593-5p	-0.17	-0.22	N/A
PPAPDC2	ENST00000381883.2	phosphatidic acid phosphatase type 2 domain containing 2	263	1	0	1	0	0	hsa-miR-593-5p	-0.17	-0.22	N/A
ZBTB43	ENST00000449886.1	zinc finger and BTB domain containing 43	396	1	0	0	1	0	hsa-miR-593-5p	-0.17	-0.17	N/A
GATAD2B	ENST00000368655.4	GATA zinc finger domain containing 2B	48	1	0	1	0	0	hsa-miR-593-5p	-0.17	-0.17	N/A
CCDC125	ENST00000396496.2	coiled-coil domain containing 125	69	1	1	0	0	0	hsa-miR-593-5p	-0.17	-0.17	N/A
LPP	ENST00000312675.4	LIM domain containing preferred translocation partner in lipoma	1894	2	1	1	0	0	hsa-miR-593-5p	-0.17	-0.17	N/A
NFKBIE	ENST00000275015.5	nuclear factor of kappa light polypeptide gene enhancer in B-cells inhibitor, epsilon	49	1	0	1	0	0	hsa-miR-593-5p	-0.17	-0.17	N/A
IL12RB2	ENST00000262345.1	interleukin 12 receptor, beta 2	5	1	0	0	1	0	hsa-miR-593-5p	-0.17	-0.17	N/A
INCA1	ENST00000355025.3	inhibitor of CDK, cyclin A1 interacting protein 1	6	1	0	1	0	0	hsa-miR-593-5p	-0.17	-0.17	N/A
GOLGA6D	ENST00000434739.3	golgin A6 family, member D	0	1	1	0	0	0	hsa-miR-593-5p	-0.17	-0.17	N/A
GRB10	ENST00000398812.2	growth factor receptor-bound protein 10	1382	1	0	0	1	0	hsa-miR-593-5p	-0.17	-0.17	N/A
LACTB	ENST00000413507.2	lactamase, beta	746	1	0	1	0	1	hsa-miR-593-5p	-0.17	-0.18	N/A
CANT1	ENST00000392446.5	calcium activated nucleotidase 1	538	1	0	0	1	2	hsa-miR-593-5p	-0.17	-0.19	N/A
KCNK12	ENST00000327876.4	potassium channel, subfamily K, member 12	5	1	0	0	1	0	hsa-miR-593-5p	-0.17	-0.17	N/A
HSPA12B	ENST00000254963.2	heat shock 70kD protein 12B	16	1	0	0	1	0	hsa-miR-593-5p	-0.17	-0.17	N/A
WDR45B	ENST00000392325.4	WD repeat domain 45B	962	1	1	0	0	0	hsa-miR-593-5p	-0.17	-0.17	N/A
CSGALNACT2	ENST00000374466.3	chondroitin sulfate N-acetylgalactosaminyltransferase 2	128	1	0	1	0	0	hsa-miR-593-5p	-0.17	-0.17	N/A
CCDC134	ENST00000255784.5	coiled-coil domain containing 134	15	1	0	0	1	0	hsa-miR-593-5p	-0.17	-0.17	N/A
AXIN2	ENST00000307078.5	axin 2	86	1	0	1	0	0	hsa-miR-593-5p	-0.17	-0.17	N/A
FLJ45079	ENST00000374983.2		5	1	0	1	0	0	hsa-miR-593-5p	-0.17	-0.17	N/A
CLMP	ENST00000448775.2	CXADR-like membrane protein	212	1	1	0	0	1	hsa-miR-593-5p	-0.17	-0.17	N/A
CSNK1G1	ENST00000303052.7	casein kinase 1, gamma 1	149	1	0	1	0	0	hsa-miR-593-5p	-0.17	-0.17	N/A
HMBOX1	ENST00000397358.3	homeobox containing 1	27	2	0	1	1	0	hsa-miR-593-5p	-0.17	-0.3	N/A
TTLL11	ENST00000373776.3	tubulin tyrosine ligase-like family, member 11	164	1	0	0	1	1	hsa-miR-593-5p	-0.17	-0.18	N/A
CRIP2	ENST00000329146.4	cysteine-rich protein 2	3446	1	0	1	0	0	hsa-miR-593-5p	-0.17	-0.17	N/A
SPRN	ENST00000414069.2	shadow of prion protein homolog (zebrafish)	5	1	0	0	1	0	hsa-miR-593-5p	-0.17	-0.17	N/A
ATG16L1	ENST00000392017.4	autophagy related 16-like 1 (S. cerevisiae)	552	1	0	0	1	0	hsa-miR-593-5p	-0.17	-0.17	N/A
NUDT16L1	ENST00000405142.1	nudix (nucleoside diphosphate linked moiety X)-type motif 16-like 1	2062	1	0	0	1	0	hsa-miR-593-5p	-0.17	-0.17	N/A
TMEM184B	ENST00000361906.3	transmembrane protein 184B	1362	1	0	0	1	1	hsa-miR-593-5p	-0.17	-0.17	N/A
RNF125	ENST00000217740.3	ring finger protein 125, E3 ubiquitin protein ligase	214	1	0	0	1	0	hsa-miR-593-5p	-0.17	-0.17	N/A
BBS5	ENST00000295240.3	Bardet-Biedl syndrome 5	1168	1	0	1	0	1	hsa-miR-593-5p	-0.17	-0.17	N/A
SLC27A1	ENST00000252595.7	solute carrier family 27 (fatty acid transporter), member 1	33	1	0	1	0	0	hsa-miR-593-5p	-0.17	-0.17	N/A
UBTD2	ENST00000393792.2	ubiquitin domain containing 2	297	1	0	1	0	0	hsa-miR-593-5p	-0.17	-0.22	N/A
TNIK	ENST00000436636.2	TRAF2 and NCK interacting kinase	106	3	1	0	2	0	hsa-miR-593-5p	-0.17	-0.39	N/A
ZNF10	ENST00000248211.6	zinc finger protein 10	96	1	0	0	1	0	hsa-miR-593-5p	-0.17	-0.21	N/A
RER1	ENST00000605895.1	RER1 retention in endoplasmic reticulum 1 homolog (S. cerevisiae)	2954	1	1	0	0	0	hsa-miR-593-5p	-0.17	-0.27	N/A
YME1L1	ENST00000326799.3	YME1-like 1 ATPase	477	1	1	0	0	0	hsa-miR-593-5p	-0.17	-0.23	N/A
EVI5L	ENST00000270530.4	ecotropic viral integration site 5-like	15	1	0	0	1	1	hsa-miR-593-5p	-0.17	-0.17	N/A
PKDREJ	ENST00000253255.5	polycystin (PKD) family receptor for egg jelly	5	1	0	1	0	0	hsa-miR-593-5p	-0.17	-0.17	N/A
IL1RL1	ENST00000311734.2	interleukin 1 receptor-like 1	5	1	0	0	1	0	hsa-miR-593-5p	-0.17	-0.17	N/A
CNNM1	ENST00000356713.4	cyclin M1	45	2*	0	0	1	2	hsa-miR-593-5p	-0.17	-0.17	N/A
MITF	ENST00000328528.6	microphthalmia-associated transcription factor	593	1	0	1	0	0	hsa-miR-593-5p	-0.17	-0.18	N/A
SNX33	ENST00000308527.5	sorting nexin 33	148	2	0	1	1	2	hsa-miR-593-5p	-0.17	-0.21	N/A
TEX261	ENST00000272438.4	testis expressed 261	359	1	0	1	0	0	hsa-miR-593-5p	-0.17	-0.23	N/A
YY1	ENST00000262238.4	YY1 transcription factor	1803	2	1	0	1	2	hsa-miR-593-5p	-0.17	-0.27	N/A
OGT	ENST00000373719.3	O-linked N-acetylglucosamine (GlcNAc) transferase	1036	1	1	0	0	0	hsa-miR-593-5p	-0.17	-0.35	N/A
SUN2	ENST00000405510.1	Sad1 and UNC84 domain containing 2	501	2	0	1	1	0	hsa-miR-593-5p	-0.17	-0.17	N/A
TOMM40	ENST00000592434.1	translocase of outer mitochondrial membrane 40 homolog (yeast)	14	1	0	0	1	1	hsa-miR-593-5p	-0.17	-0.17	N/A
FBXW8	ENST00000455858.2	F-box and WD repeat domain containing 8	169	1	0	0	1	0	hsa-miR-593-5p	-0.17	-0.17	N/A
GATA5	ENST00000252997.2	GATA binding protein 5	7	1	0	0	1	0	hsa-miR-593-5p	-0.17	-0.17	N/A
ADM	ENST00000278175.5	adrenomedullin	1541	1	0	1	0	0	hsa-miR-593-5p	-0.17	-0.17	N/A
MPRIP	ENST00000341712.4	myosin phosphatase Rho interacting protein	521	6*	2	1	2	0	hsa-miR-593-5p	-0.17	-0.29	N/A
NUCB1	ENST00000405315.4	nucleobindin 1	851	1	0	0	1	1	hsa-miR-593-5p	-0.17	-0.2	N/A
KLHL3	ENST00000541417.1	kelch-like family member 3	40	1	0	0	1	0	hsa-miR-593-5p	-0.17	-0.19	N/A
LCLAT1	ENST00000309052.4	lysocardiolipin acyltransferase 1	397	2	0	2	0	0	hsa-miR-593-5p	-0.17	-0.17	N/A
SULF1	ENST00000458141.2	sulfatase 1	11	1	0	1	0	0	hsa-miR-593-5p	-0.17	-0.17	N/A
PDE11A	ENST00000286063.6	phosphodiesterase 11A	7	2	1	0	1	1	hsa-miR-593-5p	-0.17	-0.17	N/A
UNC5CL	ENST00000244565.3	unc-5 homolog C (C. elegans)-like	25	1	0	0	1	0	hsa-miR-593-5p	-0.17	-0.17	N/A
OPRL1	ENST00000336866.2	opiate receptor-like 1	12	1	0	1	0	0	hsa-miR-593-5p	-0.17	-0.17	N/A
SCAMP5	ENST00000425597.3	secretory carrier membrane protein 5	127	1	0	1	0	0	hsa-miR-593-5p	-0.17	-0.17	N/A
TEX22	ENST00000451127.2	testis expressed 22	9	3	0	2	1	0	hsa-miR-593-5p	-0.17	-0.38	N/A
KPNA6	ENST00000373625.3	karyopherin alpha 6 (importin alpha 7)	272	1	1	0	0	0	hsa-miR-593-5p	-0.17	-0.21	N/A
CASC10	ENST00000377113.5	cancer susceptibility candidate 10	116	1	0	0	1	0	hsa-miR-593-5p	-0.17	-0.19	N/A
AMIGO1	ENST00000369864.4	adhesion molecule with Ig-like domain 1	167	1	0	0	1	0	hsa-miR-593-5p	-0.17	-0.17	N/A
VWC2L	ENST00000427124.1	von Willebrand factor C domain containing protein 2-like	5	1	0	1	0	0	hsa-miR-593-5p	-0.17	-0.17	N/A
CDC25B	ENST00000245960.5	cell division cycle 25B	3358	1	0	1	0	0	hsa-miR-593-5p	-0.17	-0.17	N/A
TUBB4A	ENST00000264071.2	tubulin, beta 4A class IVa	8	1	0	1	0	0	hsa-miR-593-5p	-0.17	-0.17	N/A
RASSF7	ENST00000397582.3	Ras association (RalGDS/AF-6) domain family (N-terminal) member 7	147	1	0	1	0	0	hsa-miR-593-5p	-0.17	-0.17	N/A
NAIF1	ENST00000373078.4	nuclear apoptosis inducing factor 1	19	1	0	0	1	1	hsa-miR-593-5p	-0.17	-0.28	N/A
STX3	ENST00000535361.1	syntaxin 3	564	2	1	1	0	1	hsa-miR-593-5p	-0.17	-0.43	N/A
MARVELD2	ENST00000325631.5	MARVEL domain containing 2	227	1	0	1	0	0	hsa-miR-593-5p	-0.17	-0.17	N/A
SGK3	ENST00000345714.4	serum/glucocorticoid regulated kinase family, member 3	56	1	0	0	1	0	hsa-miR-593-5p	-0.17	-0.25	N/A
ALDH8A1	ENST00000265605.2	aldehyde dehydrogenase 8 family, member A1	48	1	0	1	0	0	hsa-miR-593-5p	-0.17	-0.17	N/A
TMEM169	ENST00000295658.4	transmembrane protein 169	5	1	0	1	0	0	hsa-miR-593-5p	-0.17	-0.17	N/A
GCNT4	ENST00000322348.4	glucosaminyl (N-acetyl) transferase 4, core 2	19	1	1	0	0	2	hsa-miR-593-5p	-0.17	-0.4	N/A
RCVRN	ENST00000226193.5	recoverin	5	1	0	0	1	0	hsa-miR-593-5p	-0.17	-0.17	N/A
ZC3H12D	ENST00000416573.2	zinc finger CCCH-type containing 12D	13	1	0	1	0	0	hsa-miR-593-5p	-0.17	-0.17	N/A
SYT17	ENST00000355377.2	synaptotagmin XVII	38	1	0	0	1	0	hsa-miR-593-5p	-0.17	-0.17	N/A
ZNF831	ENST00000371030.2	zinc finger protein 831	5	1	1	0	0	0	hsa-miR-593-5p	-0.17	-0.17	N/A
COLGALT1	ENST00000252599.4	collagen beta(1-O)galactosyltransferase 1	427	1	0	0	1	0	hsa-miR-593-5p	-0.16	-0.19	N/A
SLC35C1	ENST00000314134.3	solute carrier family 35 (GDP-fucose transporter), member C1	856	1	0	1	0	0	hsa-miR-593-5p	-0.16	-0.2	N/A
IL10RA	ENST00000227752.3	interleukin 10 receptor, alpha	5	2	1	0	1	0	hsa-miR-593-5p	-0.16	-0.42	N/A
YARS	ENST00000373477.4	tyrosyl-tRNA synthetase	1227	1	0	1	0	0	hsa-miR-593-5p	-0.16	-0.17	N/A
MBD1	ENST00000591416.1	methyl-CpG binding domain protein 1	266	2	0	2	0	0	hsa-miR-593-5p	-0.16	-0.18	N/A
PPP1R1A	ENST00000257905.8	protein phosphatase 1, regulatory (inhibitor) subunit 1A	17	1	0	0	1	0	hsa-miR-593-5p	-0.16	-0.21	N/A
C20orf26	ENST00000377309.2	chromosome 20 open reading frame 26	5	1	0	1	0	0	hsa-miR-593-5p	-0.16	-0.16	N/A
PARVA	ENST00000334956.8	parvin, alpha	1912	1	0	0	1	0	hsa-miR-593-5p	-0.16	-0.16	N/A
PHF16	ENST00000397189.1	PHD finger protein 16	95	1	0	0	1	0	hsa-miR-593-5p	-0.16	-0.16	N/A
ST3GAL3	ENST00000372377.4	ST3 beta-galactoside alpha-2,3-sialyltransferase 3	135	1	0	0	1	0	hsa-miR-593-5p	-0.16	-0.16	N/A
TRPV4	ENST00000418703.2	transient receptor potential cation channel, subfamily V, member 4	80	1	0	0	1	0	hsa-miR-593-5p	-0.16	-0.16	N/A
EPB42	ENST00000300215.3	erythrocyte membrane protein band 4.2	5	1	0	0	1	0	hsa-miR-593-5p	-0.16	-0.16	N/A
B4GALT4	ENST00000467604.1	UDP-Gal:betaGlcNAc beta 1,4- galactosyltransferase, polypeptide 4	196	1	0	1	0	0	hsa-miR-593-5p	-0.16	-0.16	N/A
SH3RF3	ENST00000309415.6	SH3 domain containing ring finger 3	15	1	1	0	0	2	hsa-miR-593-5p	-0.16	-0.16	N/A
CXCL9	ENST00000264888.5	chemokine (C-X-C motif) ligand 9	5	1	0	1	0	0	hsa-miR-593-5p	-0.16	-0.16	N/A
ATP1B4	ENST00000218008.3	ATPase, Na+/K+ transporting, beta 4 polypeptide	5	1	0	1	0	0	hsa-miR-593-5p	-0.16	-0.16	N/A
PDGFB	ENST00000331163.6	platelet-derived growth factor beta polypeptide	5	1	0	1	0	2	hsa-miR-593-5p	-0.16	-0.16	N/A
TMCC1	ENST00000432054.2	transmembrane and coiled-coil domain family 1	97	1	1	0	0	0	hsa-miR-593-5p	-0.16	-0.23	N/A
DPPA3	ENST00000345088.2	developmental pluripotency associated 3	11	2	1	1	0	1	hsa-miR-593-5p	-0.16	-0.33	N/A
XKR8	ENST00000373884.5	XK, Kell blood group complex subunit-related family, member 8	7	1	0	1	0	0	hsa-miR-593-5p	-0.16	-0.16	N/A
ADC	ENST00000373443.3	arginine decarboxylase	15	1	0	1	0	0	hsa-miR-593-5p	-0.16	-0.16	N/A
KIF3C	ENST00000264712.3	kinesin family member 3C	177	1	0	1	0	0	hsa-miR-593-5p	-0.16	-0.16	N/A
NUP153	ENST00000262077.2	nucleoporin 153kDa	231	1	0	1	0	0	hsa-miR-593-5p	-0.16	-0.16	N/A
MAFK	ENST00000343242.4	v-maf avian musculoaponeurotic fibrosarcoma oncogene homolog K	322	2	0	1	1	0	hsa-miR-593-5p	-0.16	-0.16	N/A
NPFFR1	ENST00000277942.6	neuropeptide FF receptor 1	5	2	1	1	0	0	hsa-miR-593-5p	-0.16	-0.16	N/A
RP11-480I12.4	ENST00000330493.5	Putative inactive alpha-1,3-mannosyl-glycoprotein 4-beta-N-acetylglucosaminyltransferase-like protein LOC641515	5	1	0	1	0	0	hsa-miR-593-5p	-0.16	-0.16	N/A
QSER1	ENST00000399302.2	glutamine and serine rich 1	34	1	0	1	0	0	hsa-miR-593-5p	-0.16	-0.18	N/A
NOD1	ENST00000222823.4	nucleotide-binding oligomerization domain containing 1	31	1	1	0	0	0	hsa-miR-593-5p	-0.16	-0.44	N/A
ONECUT3	ENST00000382349.4	one cut homeobox 3	5	2	0	1	1	0	hsa-miR-593-5p	-0.16	-0.16	N/A
NT5DC3	ENST00000392876.3	5'-nucleotidase domain containing 3	235	1	0	0	1	1	hsa-miR-593-5p	-0.16	-0.16	N/A
STOX2	ENST00000308497.4	storkhead box 2	379	2	0	0	2	0	hsa-miR-593-5p	-0.16	-0.16	N/A
ADD1	ENST00000398125.1	adducin 1 (alpha)	460	1	1	0	0	1	hsa-miR-593-5p	-0.16	-0.16	N/A
CSK	ENST00000220003.9	c-src tyrosine kinase	941	1	0	1	0	0	hsa-miR-593-5p	-0.16	-0.16	N/A
USP49	ENST00000394253.3	ubiquitin specific peptidase 49	44	2	0	1	1	1	hsa-miR-593-5p	-0.16	-0.33	N/A
NPR1	ENST00000368680.3	natriuretic peptide receptor A/guanylate cyclase A (atrionatriuretic peptide receptor A)	30	3	1	0	2	1	hsa-miR-593-5p	-0.16	-0.32	N/A
RXRA	ENST00000481739.1	retinoid X receptor, alpha	609	3	0	2	1	1	hsa-miR-593-5p	-0.16	-0.45	N/A
SEPT6	ENST00000394610.1	septin 6	1854	1	0	0	1	1	hsa-miR-593-5p	-0.16	-0.17	N/A
STAT3	ENST00000585517.1	signal transducer and activator of transcription 3 (acute-phase response factor)	478	1	0	1	0	1	hsa-miR-593-5p	-0.16	-0.17	N/A
GNAS	ENST00000371075.3	GNAS complex locus	314	1	0	1	0	0	hsa-miR-593-5p	-0.16	-0.16	N/A
CSF1	ENST00000329608.6	colony stimulating factor 1 (macrophage)	290	1	1	0	0	0	hsa-miR-593-5p	-0.16	-0.16	N/A
ORAI3	ENST00000318663.4	ORAI calcium release-activated calcium modulator 3	565	1	0	1	0	0	hsa-miR-593-5p	-0.16	-0.16	N/A
PTPN4	ENST00000263708.2	protein tyrosine phosphatase, non-receptor type 4 (megakaryocyte)	215	1	1	0	0	0	hsa-miR-593-5p	-0.16	-0.17	N/A
NMNAT3	ENST00000511444.1	nicotinamide nucleotide adenylyltransferase 3	12	1	1	0	0	0	hsa-miR-593-5p	-0.16	-0.5	N/A
GOLPH3	ENST00000265070.6	golgi phosphoprotein 3 (coat-protein)	1157	1	0	1	0	0	hsa-miR-593-5p	-0.16	-0.16	N/A
CDCA4	ENST00000336219.3	cell division cycle associated 4	194	1	0	1	0	1	hsa-miR-593-5p	-0.16	-0.21	N/A
KLHL8	ENST00000273963.5	kelch-like family member 8	266	1	0	1	0	0	hsa-miR-593-5p	-0.16	-0.16	N/A
ILDR2	ENST00000469934.2	immunoglobulin-like domain containing receptor 2	7	2	1	0	1	0	hsa-miR-593-5p	-0.16	-0.6	N/A
KLF3	ENST00000261438.5	Kruppel-like factor 3 (basic)	515	1	0	0	1	0	hsa-miR-593-5p	-0.16	-0.19	N/A
MDFI	ENST00000373050.4	MyoD family inhibitor	14	1	0	1	0	0	hsa-miR-593-5p	-0.16	-0.26	N/A
PARP8	ENST00000503750.2	poly (ADP-ribose) polymerase family, member 8	80	1	0	1	0	0	hsa-miR-593-5p	-0.16	-0.26	N/A
DTL	ENST00000366991.4	denticleless E3 ubiquitin protein ligase homolog (Drosophila)	883	1	0	0	1	0	hsa-miR-593-5p	-0.16	-0.19	N/A
HRH3	ENST00000340177.5	histamine receptor H3	5	1	0	1	0	1	hsa-miR-593-5p	-0.16	-0.16	N/A
SLC16A2	ENST00000587091.1	solute carrier family 16, member 2 (thyroid hormone transporter)	22	1	0	0	1	0	hsa-miR-593-5p	-0.16	-0.16	N/A
RGS11	ENST00000397770.3	regulator of G-protein signaling 11	5	1	0	0	1	1	hsa-miR-593-5p	-0.16	-0.16	N/A
MRC2	ENST00000303375.5	mannose receptor, C type 2	74	1	0	0	1	1	hsa-miR-593-5p	-0.16	-0.16	N/A
ZNF585A	ENST00000356958.4	zinc finger protein 585A	77	1	1	0	0	0	hsa-miR-593-5p	-0.16	-0.16	N/A
FERMT3	ENST00000345728.5	fermitin family member 3	10	1	0	1	0	0	hsa-miR-593-5p	-0.16	-0.16	N/A
COL20A1	ENST00000422202.1	collagen, type XX, alpha 1	5	2	0	1	1	0	hsa-miR-593-5p	-0.16	-0.16	N/A
NOX5	ENST00000260364.5	NADPH oxidase, EF-hand calcium binding domain 5	5	1	0	0	1	0	hsa-miR-593-5p	-0.16	-0.16	N/A
ZFP41	ENST00000520584.1	ZFP41 zinc finger protein	7	2	0	2	0	1	hsa-miR-593-5p	-0.16	-0.43	N/A
CXorf36	ENST00000398000.2	chromosome X open reading frame 36	5	1	0	1	0	0	hsa-miR-593-5p	-0.16	-0.16	N/A
ATF7IP	ENST00000261168.4	activating transcription factor 7 interacting protein	667	1	1	0	0	0	hsa-miR-593-5p	-0.16	-0.17	N/A
UBIAD1	ENST00000376810.5	UbiA prenyltransferase domain containing 1	303	1	1	0	0	0	hsa-miR-593-5p	-0.16	-0.35	N/A
C16orf58	ENST00000570164.1	chromosome 16 open reading frame 58	25	2	0	2	0	0	hsa-miR-593-5p	-0.16	-0.16	N/A
ECEL1	ENST00000304546.1	endothelin converting enzyme-like 1	6	1	0	0	1	0	hsa-miR-593-5p	-0.16	-0.16	N/A
KIAA1324	ENST00000369939.3	KIAA1324	41	1	0	0	1	1	hsa-miR-593-5p	-0.16	-0.16	N/A
LPPR1	ENST00000374874.3	Lipid phosphate phosphatase-related protein type 1	19	1	0	0	1	0	hsa-miR-593-5p	-0.16	-0.16	N/A
THSD7A	ENST00000423059.4	thrombospondin, type I, domain containing 7A	5	1	0	0	1	0	hsa-miR-593-5p	-0.16	-0.16	N/A
FSBP	ENST00000481490.2	fibrinogen silencer binding protein	36	1	0	1	0	0	hsa-miR-593-5p	-0.16	-0.19	N/A
NKD1	ENST00000268459.3	naked cuticle homolog 1 (Drosophila)	26	2	1	1	0	1	hsa-miR-593-5p	-0.16	-0.48	N/A
YTHDF1	ENST00000370339.3	YTH domain family, member 1	748	1	0	1	0	0	hsa-miR-593-5p	-0.16	-0.19	N/A
MIEF1	ENST00000325301.2	mitochondrial elongation factor 1	2319	1	0	1	0	0	hsa-miR-593-5p	-0.16	-0.16	N/A
C16orf71	ENST00000299320.5	chromosome 16 open reading frame 71	5	1	0	0	1	0	hsa-miR-593-5p	-0.16	-0.16	N/A
GIPC3	ENST00000322315.5	GIPC PDZ domain containing family, member 3	48	1	1	0	0	0	hsa-miR-593-5p	-0.16	-0.16	N/A
C6orf211	ENST00000367294.3	chromosome 6 open reading frame 211	65	1	0	1	0	0	hsa-miR-593-5p	-0.16	-0.16	N/A
CPLX4	ENST00000587244.1	complexin 4	5	1	0	0	1	0	hsa-miR-593-5p	-0.16	-0.16	N/A
FUK	ENST00000288078.6	fucokinase	67	1	0	1	0	0	hsa-miR-593-5p	-0.16	-0.16	N/A
MXRA7	ENST00000355797.3	matrix-remodelling associated 7	421	1	1	0	0	2	hsa-miR-593-5p	-0.16	-0.22	N/A
DGKD	ENST00000264057.2	diacylglycerol kinase, delta 130kDa	200	1	1	0	0	0	hsa-miR-593-5p	-0.16	-0.16	N/A
QSOX1	ENST00000367602.3	quiescin Q6 sulfhydryl oxidase 1	9246	5	0	0	5	2	hsa-miR-593-5p	-0.16	-0.55	N/A
CYB5B	ENST00000512062.1	cytochrome b5 type B (outer mitochondrial membrane)	2472	1	0	1	0	0	hsa-miR-593-5p	-0.16	-0.17	N/A
HIST2H3C	ENST00000369158.1	histone cluster 2, H3c	5	1	0	1	0	1	hsa-miR-593-5p	-0.15	-0.15	N/A
DNAH3	ENST00000415178.1	dynein, axonemal, heavy chain 3	5	1	1	0	0	2	hsa-miR-593-5p	-0.15	-0.15	N/A
EIF5	ENST00000216554.3	eukaryotic translation initiation factor 5	970	1	1	0	0	0	hsa-miR-593-5p	-0.15	-0.34	N/A
YPEL1	ENST00000339468.3	yippee-like 1 (Drosophila)	81	1	0	0	1	1	hsa-miR-593-5p	-0.15	-0.3	N/A
KIF26A	ENST00000315264.7	kinesin family member 26A	494	1	0	0	1	0	hsa-miR-593-5p	-0.15	-0.15	N/A
LIPH	ENST00000296252.4	lipase, member H	18	1	0	0	1	0	hsa-miR-593-5p	-0.15	-0.15	N/A
HIST2H3A	ENST00000403683.1	histone cluster 2, H3a	5	1	0	1	0	1	hsa-miR-593-5p	-0.15	-0.15	N/A
CRCP	ENST00000415001.2	CGRP receptor component	1776	1	0	1	0	0	hsa-miR-593-5p	-0.15	-0.15	N/A
WDFY1	ENST00000233055.4	WD repeat and FYVE domain containing 1	88	1	0	1	0	0	hsa-miR-593-5p	-0.15	-0.19	N/A
FBXW11	ENST00000296933.6	F-box and WD repeat domain containing 11	81	1	0	0	1	0	hsa-miR-593-5p	-0.15	-0.16	N/A
PGBD5	ENST00000391860.1	piggyBac transposable element derived 5	20	1	0	0	1	1	hsa-miR-593-5p	-0.15	-0.19	N/A
DIP2B	ENST00000301180.5	DIP2 disco-interacting protein 2 homolog B (Drosophila)	1613	1	0	1	0	0	hsa-miR-593-5p	-0.15	-0.16	N/A
NT5C	ENST00000582170.1	5', 3'-nucleotidase, cytosolic	649	1	0	1	0	0	hsa-miR-593-5p	-0.15	-0.15	N/A
XPNPEP2	ENST00000371106.3	X-prolyl aminopeptidase (aminopeptidase P) 2, membrane-bound	5	2	0	0	2	0	hsa-miR-593-5p	-0.15	-0.24	N/A
NIPBL	ENST00000448238.2	Nipped-B homolog (Drosophila)	250	1	0	1	0	0	hsa-miR-593-5p	-0.15	-0.16	N/A
CHD2	ENST00000394196.4	chromodomain helicase DNA binding protein 2	1237	1	0	0	1	0	hsa-miR-593-5p	-0.15	-0.15	N/A
KCTD21	ENST00000340067.3	potassium channel tetramerization domain containing 21	90	1	0	0	1	0	hsa-miR-593-5p	-0.15	-0.15	N/A
PHF21B	ENST00000403565.1	PHD finger protein 21B	8	1	0	1	0	0	hsa-miR-593-5p	-0.15	-0.15	N/A
TPBGL	ENST00000562197.2	trophoblast glycoprotein-like	8	1	0	0	1	0	hsa-miR-593-5p	-0.15	-0.15	N/A
TBC1D24	ENST00000567020.1	TBC1 domain family, member 24	269	3	0	2	1	0	hsa-miR-593-5p	-0.15	-0.15	N/A
HSPA4	ENST00000304858.2	heat shock 70kDa protein 4	1869	1	0	1	0	0	hsa-miR-593-5p	-0.15	-0.2	N/A
RRAGD	ENST00000369415.4	Ras-related GTP binding D	644	2	0	1	1	1	hsa-miR-593-5p	-0.15	-0.3	N/A
TBC1D13	ENST00000372648.5	TBC1 domain family, member 13	2204	1	0	0	1	1	hsa-miR-593-5p	-0.15	-0.15	N/A
CD86	ENST00000330540.2	CD86 molecule	5	1	0	1	0	0	hsa-miR-593-5p	-0.15	-0.15	N/A
SHOX	ENST00000381578.1	short stature homeobox	5	1	1	0	0	0	hsa-miR-593-5p	-0.15	-0.15	N/A
DHODH	ENST00000219240.4	dihydroorotate dehydrogenase (quinone)	152	2	0	1	1	2	hsa-miR-593-5p	-0.15	-0.5	N/A
PRIMA1	ENST00000393140.1	proline rich membrane anchor 1	5	1	0	1	0	0	hsa-miR-593-5p	-0.15	-0.15	N/A
TBCD	ENST00000355528.4	tubulin folding cofactor D	148	1	0	1	0	0	hsa-miR-593-5p	-0.15	-0.15	N/A
DLL4	ENST00000249749.5	delta-like 4 (Drosophila)	605	1	0	0	1	0	hsa-miR-593-5p	-0.15	-0.15	N/A
EIF3H	ENST00000521861.1	eukaryotic translation initiation factor 3, subunit H	27	1	0	0	1	0	hsa-miR-593-5p	-0.15	-0.23	N/A
HS2ST1	ENST00000370550.5	heparan sulfate 2-O-sulfotransferase 1	787	1	1	0	0	0	hsa-miR-593-5p	-0.15	-0.3	N/A
B3GNT6	ENST00000533140.1	UDP-GlcNAc:betaGal beta-1,3-N-acetylglucosaminyltransferase 6 (core 3 synthase)	5	1	0	1	0	0	hsa-miR-593-5p	-0.15	-0.15	N/A
OSMR	ENST00000274276.3	oncostatin M receptor	2781	1	0	1	0	0	hsa-miR-593-5p	-0.15	-0.15	N/A
RNF44	ENST00000274811.4	ring finger protein 44	1623	1	1	0	0	0	hsa-miR-593-5p	-0.15	-0.15	N/A
HSD3B7	ENST00000353250.5	hydroxy-delta-5-steroid dehydrogenase, 3 beta- and steroid delta-isomerase 7	173	1	0	1	0	0	hsa-miR-593-5p	-0.15	-0.15	N/A
CTD-2228K2.5	ENST00000342584.3	Uncharacterized protein	199	1	0	0	1	0	hsa-miR-593-5p	-0.15	-0.15	N/A
FRAT2	ENST00000371019.2	frequently rearranged in advanced T-cell lymphomas 2	120	1	0	0	1	0	hsa-miR-593-5p	-0.15	-0.27	N/A
CDON	ENST00000392693.3	cell adhesion associated, oncogene regulated	173	1	1	0	0	0	hsa-miR-593-5p	-0.15	-0.15	N/A
PPP1R3G	ENST00000405617.2	protein phosphatase 1, regulatory subunit 3G	29	1	0	0	1	0	hsa-miR-593-5p	-0.15	-0.15	N/A
SBK1	ENST00000341901.4	SH3 domain binding kinase 1	9	2	0	1	1	1	hsa-miR-593-5p	-0.15	-0.15	N/A
LRP4	ENST00000378623.1	low density lipoprotein receptor-related protein 4	152	1	1	0	0	0	hsa-miR-593-5p	-0.15	-0.15	N/A
ZXDC	ENST00000336332.5	ZXD family zinc finger C	131	1	1	0	0	1	hsa-miR-593-5p	-0.15	-0.16	N/A
ELAC2	ENST00000338034.4	elaC ribonuclease Z 2	2017	1	0	1	0	0	hsa-miR-593-5p	-0.15	-0.15	N/A
BAG5	ENST00000299204.4	BCL2-associated athanogene 5	267	1	1	0	0	1	hsa-miR-593-5p	-0.15	-0.15	N/A
PITPNM3	ENST00000421306.3	PITPNM family member 3	5	1	0	0	1	3	hsa-miR-593-5p	-0.15	-0.15	N/A
KCNJ6	ENST00000609713.1	potassium inwardly-rectifying channel, subfamily J, member 6	5	2	0	2	0	4	hsa-miR-593-5p	-0.15	-0.15	N/A
CATSPER4	ENST00000456354.2	cation channel, sperm associated 4	5	1	0	1	0	0	hsa-miR-593-5p	-0.15	-0.15	N/A
CDH23	ENST00000299366.7	cadherin-related 23	52	1	0	1	0	0	hsa-miR-593-5p	-0.15	-0.15	N/A
FIBCD1	ENST00000448616.1	fibrinogen C domain containing 1	44	2	0	2	0	1	hsa-miR-593-5p	-0.15	-0.2	N/A
GRSF1	ENST00000254799.6	G-rich RNA sequence binding factor 1	4414	1	0	1	0	1	hsa-miR-593-5p	-0.15	-0.25	N/A
F7	ENST00000375581.3	coagulation factor VII (serum prothrombin conversion accelerator)	458	1	0	1	0	1	hsa-miR-593-5p	-0.15	-0.21	N/A
SPN	ENST00000360121.3	sialophorin	5	1	0	1	0	0	hsa-miR-593-5p	-0.15	-0.15	N/A
FUT2	ENST00000425340.2	fucosyltransferase 2 (secretor status included)	10	1	0	1	0	0	hsa-miR-593-5p	-0.15	-0.15	N/A
BPI	ENST00000451435.1	bactericidal/permeability-increasing protein	5	1	0	1	0	0	hsa-miR-593-5p	-0.15	-0.15	N/A
FOXN3	ENST00000345097.4	forkhead box N3	42	1	1	0	0	0	hsa-miR-593-5p	-0.15	-0.15	N/A
ZNF785	ENST00000470110.1	zinc finger protein 785	40	1	0	1	0	0	hsa-miR-593-5p	-0.15	-0.15	N/A
UST	ENST00000367463.4	uronyl-2-sulfotransferase	933	1	0	0	1	0	hsa-miR-593-5p	-0.15	-0.16	N/A
MMP14	ENST00000311852.6	matrix metallopeptidase 14 (membrane-inserted)	276	1	1	0	0	1	hsa-miR-593-5p	-0.15	-0.17	N/A
C17orf82	ENST00000335108.2	chromosome 17 open reading frame 82	10	2	0	2	0	1	hsa-miR-593-5p	-0.15	-0.33	N/A
KLHL30	ENST00000409223.1	kelch-like family member 30	5	2	0	1	1	2	hsa-miR-593-5p	-0.15	-0.39	N/A
RBM18	ENST00000417201.3	RNA binding motif protein 18	963	1	0	0	1	0	hsa-miR-593-5p	-0.15	-0.23	N/A
MBNL3	ENST00000370839.3	muscleblind-like splicing regulator 3	593	1	1	0	0	0	hsa-miR-593-5p	-0.15	-0.18	N/A
SASH3	ENST00000356892.3	SAM and SH3 domain containing 3	5	1	0	1	0	0	hsa-miR-593-5p	-0.15	-0.15	N/A
OGFOD2	ENST00000536150.1	2-oxoglutarate and iron-dependent oxygenase domain containing 2	111	1	0	1	0	1	hsa-miR-593-5p	-0.15	-0.36	N/A
PDXP	ENST00000215904.6	pyridoxal (pyridoxine, vitamin B6) phosphatase	58	1	0	1	0	0	hsa-miR-593-5p	-0.15	-0.15	N/A
GAREML	ENST00000401533.2	GRB2 associated, regulator of MAPK1-like	496	1	0	1	0	1	hsa-miR-593-5p	-0.15	-0.15	N/A
MYRF	ENST00000278836.5	myelin regulatory factor	131	1	0	1	0	2	hsa-miR-593-5p	-0.15	-0.15	N/A
RIMKLB	ENST00000357529.3	ribosomal modification protein rimK-like family member B	164	1	0	1	0	0	hsa-miR-593-5p	-0.15	-0.31	N/A
AGMAT	ENST00000375826.3	agmatine ureohydrolase (agmatinase)	331	2	0	0	2	1	hsa-miR-593-5p	-0.15	-0.41	N/A
EBF3	ENST00000368648.3	early B-cell factor 3	101	1	0	0	1	0	hsa-miR-593-5p	-0.15	-0.15	N/A
TENC1	ENST00000314250.6	tensin like C1 domain containing phosphatase (tensin 2)	240	1	0	0	1	0	hsa-miR-593-5p	-0.15	-0.15	N/A
C10orf115	ENST00000376501.5	chromosome 10 open reading frame 115	5	1*	0	0	0	1	hsa-miR-593-5p	-0.15	-0.15	N/A
BCL2L2	ENST00000250405.5	BCL2-like 2	1380	2	0	2	0	0	hsa-miR-593-5p	-0.15	-0.38	N/A
LINC00346	ENST00000538077.1	long intergenic non-protein coding RNA 346	26	1	1	0	0	0	hsa-miR-593-5p	-0.15	-0.26	N/A
PTP4A3	ENST00000520105.1	protein tyrosine phosphatase type IVA, member 3	65	2	0	1	1	0	hsa-miR-593-5p	-0.15	-0.19	N/A
WSCD1	ENST00000574946.1	WSC domain containing 1	403	1	0	0	1	0	hsa-miR-593-5p	-0.15	-0.15	N/A
FYB	ENST00000351578.6	FYN binding protein	5	1	0	0	1	0	hsa-miR-593-5p	-0.15	-0.15	N/A
GRIN3A	ENST00000361820.3	glutamate receptor, ionotropic, N-methyl-D-aspartate 3A	5	1	0	0	1	0	hsa-miR-593-5p	-0.15	-0.15	N/A
UNC5A	ENST00000261961.3	unc-5 homolog A (C. elegans)	7	1	0	1	0	1	hsa-miR-593-5p	-0.15	-0.15	N/A
CSPG4	ENST00000308508.5	chondroitin sulfate proteoglycan 4	817	1	0	0	1	0	hsa-miR-593-5p	-0.15	-0.15	N/A
HAPLN3	ENST00000359595.3	hyaluronan and proteoglycan link protein 3	299	1	0	1	0	0	hsa-miR-593-5p	-0.15	-0.15	N/A
CAPN1	ENST00000533820.1	calpain 1, (mu/I) large subunit	538	1	0	0	1	0	hsa-miR-593-5p	-0.15	-0.15	N/A
SIK2	ENST00000304987.3	salt-inducible kinase 2	378	2	0	0	2	3	hsa-miR-593-5p	-0.15	-0.22	N/A
OSBPL5	ENST00000478260.1	oxysterol binding protein-like 5	215	1	0	0	1	1	hsa-miR-593-5p	-0.15	-0.18	N/A
TRPC5	ENST00000262839.2	transient receptor potential cation channel, subfamily C, member 5	5	1	0	0	1	0	hsa-miR-593-5p	-0.14	-0.14	N/A
CACNA1D	ENST00000288139.4	calcium channel, voltage-dependent, L type, alpha 1D subunit	5	1	0	0	1	0	hsa-miR-593-5p	-0.14	-0.14	N/A
ADCY7	ENST00000394697.2	adenylate cyclase 7	238	1	0	0	1	0	hsa-miR-593-5p	-0.14	-0.14	N/A
KCNA7	ENST00000221444.1	potassium voltage-gated channel, shaker-related subfamily, member 7	11	1	0	1	0	0	hsa-miR-593-5p	-0.14	-0.14	N/A
TTC39C	ENST00000540918.2	tetratricopeptide repeat domain 39C	494	1	0	1	0	0	hsa-miR-593-5p	-0.14	-0.24	N/A
FBXO42	ENST00000375592.3	F-box protein 42	854	1	1	0	0	1	hsa-miR-593-5p	-0.14	-0.31	N/A
LAMP1	ENST00000332556.4	lysosomal-associated membrane protein 1	566	1	1	0	0	6	hsa-miR-593-5p	-0.14	-0.42	N/A
ATG4B	ENST00000404914.3	autophagy related 4B, cysteine peptidase	1444	1	0	1	0	0	hsa-miR-593-5p	-0.14	-0.14	N/A
ECT2L	ENST00000423192.1	epithelial cell transforming sequence 2 oncogene-like	5	1	0	0	1	0	hsa-miR-593-5p	-0.14	-0.14	N/A
ZYG11B	ENST00000294353.6	zyg-11 family member B, cell cycle regulator	975	1	0	1	0	0	hsa-miR-593-5p	-0.14	-0.14	N/A
FAM83A	ENST00000518448.1	family with sequence similarity 83, member A	22	1	0	0	1	1	hsa-miR-593-5p	-0.14	-0.14	N/A
FOXA3	ENST00000302177.2	forkhead box A3	906	1	0	0	1	0	hsa-miR-593-5p	-0.14	-0.14	N/A
C15orf39	ENST00000567617.1	chromosome 15 open reading frame 39	1023	1	0	1	0	0	hsa-miR-593-5p	-0.14	-0.14	N/A
C8orf44-SGK3	ENST00000519289.1	C8orf44-SGK3 readthrough	56	1	0	0	1	0	hsa-miR-593-5p	-0.14	-0.25	N/A
N4BP3	ENST00000274605.5	NEDD4 binding protein 3	35	2	1	1	0	3	hsa-miR-593-5p	-0.14	-0.24	N/A
SCAMP4	ENST00000316097.8	secretory carrier membrane protein 4	223	1	0	1	0	1	hsa-miR-593-5p	-0.14	-0.14	N/A
OTUD4	ENST00000454497.2	OTU domain containing 4	18	1	0	1	0	0	hsa-miR-593-5p	-0.14	-0.14	N/A
SOX13	ENST00000367204.1	SRY (sex determining region Y)-box 13	1061	1	0	1	0	0	hsa-miR-593-5p	-0.14	-0.14	N/A
PRR26	ENST00000381489.5	proline rich 26	5	1	0	0	1	0	hsa-miR-593-5p	-0.14	-0.14	N/A
FBXO31	ENST00000311635.7	F-box protein 31	48	1	0	0	1	0	hsa-miR-593-5p	-0.14	-0.14	N/A
BAIAP3	ENST00000397488.2	BAI1-associated protein 3	10	1	0	0	1	0	hsa-miR-593-5p	-0.14	-0.14	N/A
UNC13A	ENST00000519716.2	unc-13 homolog A (C. elegans)	5	1	0	0	1	1	hsa-miR-593-5p	-0.14	-0.14	N/A
ZFYVE28	ENST00000508471.1	zinc finger, FYVE domain containing 28	18	1	0	1	0	1	hsa-miR-593-5p	-0.14	-0.18	N/A
ADAT1	ENST00000307921.3	adenosine deaminase, tRNA-specific 1	597	1	1	0	0	1	hsa-miR-593-5p	-0.14	-0.18	N/A
TFAP2E	ENST00000373235.3	transcription factor AP-2 epsilon (activating enhancer binding protein 2 epsilon)	7	1	0	1	0	0	hsa-miR-593-5p	-0.14	-0.14	N/A
L2HGDH	ENST00000267436.4	L-2-hydroxyglutarate dehydrogenase	893	1	0	1	0	0	hsa-miR-593-5p	-0.14	-0.14	N/A
KIAA1199	ENST00000220244.3	KIAA1199	660	1	0	0	1	1	hsa-miR-593-5p	-0.14	-0.14	N/A
B4GALT5	ENST00000371711.4	UDP-Gal:betaGlcNAc beta 1,4- galactosyltransferase, polypeptide 5	1000	1	0	0	1	1	hsa-miR-593-5p	-0.14	-0.14	N/A
SENP7	ENST00000394095.2	SUMO1/sentrin specific peptidase 7	342	1	1	0	0	0	hsa-miR-593-5p	-0.14	-0.14	N/A
TMEM170A	ENST00000357613.4	transmembrane protein 170A	70	1	0	0	1	0	hsa-miR-593-5p	-0.14	-0.22	N/A
GCFC2	ENST00000541687.1	GC-rich sequence DNA-binding factor 2	88	1	0	1	0	0	hsa-miR-593-5p	-0.14	-0.15	N/A
DYM	ENST00000442713.2	dymeclin	547	1	0	1	0	1	hsa-miR-593-5p	-0.14	-0.17	N/A
RABGEF1	ENST00000284957.5	RAB guanine nucleotide exchange factor (GEF) 1	289	1	0	0	1	0	hsa-miR-593-5p	-0.14	-0.21	N/A
VPS37C	ENST00000301765.5	vacuolar protein sorting 37 homolog C (S. cerevisiae)	3267	1	0	1	0	0	hsa-miR-593-5p	-0.14	-0.14	N/A
COL8A2	ENST00000303143.4	collagen, type VIII, alpha 2	15	1	0	0	1	0	hsa-miR-593-5p	-0.14	-0.14	N/A
MEX3B	ENST00000558133.1	mex-3 RNA binding family member B	1401	1	0	1	0	2	hsa-miR-593-5p	-0.14	-0.14	N/A
TP53INP2	ENST00000374810.3	tumor protein p53 inducible nuclear protein 2	12	1	0	1	0	0	hsa-miR-593-5p	-0.14	-0.14	N/A
VWA1	ENST00000338660.5	von Willebrand factor A domain containing 1	145	1	0	1	0	2	hsa-miR-593-5p	-0.14	-0.14	N/A
GPR132	ENST00000329797.3	G protein-coupled receptor 132	5	1	0	0	1	0	hsa-miR-593-5p	-0.14	-0.14	N/A
KCTD3	ENST00000259154.4	potassium channel tetramerization domain containing 3	372	1	0	1	0	0	hsa-miR-593-5p	-0.14	-0.14	N/A
LOH12CR1	ENST00000314565.4	loss of heterozygosity, 12, chromosomal region 1	135	2	0	1	1	0	hsa-miR-593-5p	-0.14	-0.31	N/A
CCDC89	ENST00000316398.3	coiled-coil domain containing 89	11	1	0	1	0	0	hsa-miR-593-5p	-0.14	-0.33	N/A
SERINC3	ENST00000342374.4	serine incorporator 3	1218	1	0	1	0	0	hsa-miR-593-5p	-0.14	-0.24	N/A
LAPTM4B	ENST00000445593.2	lysosomal protein transmembrane 4 beta	11776	1	0	1	0	0	hsa-miR-593-5p	-0.14	-0.14	N/A
PRR5L	ENST00000527487.1	proline rich 5 like	238	1	0	1	0	0	hsa-miR-593-5p	-0.14	-0.14	N/A
BSPRY	ENST00000374183.4	B-box and SPRY domain containing	14	1	0	1	0	0	hsa-miR-593-5p	-0.14	-0.14	N/A
BTN2A2	ENST00000432533.2	butyrophilin, subfamily 2, member A2	125	1	0	1	0	1	hsa-miR-593-5p	-0.14	-0.17	N/A
ASIC2	ENST00000225823.2	acid-sensing (proton-gated) ion channel 2	5	1	0	1	0	0	hsa-miR-593-5p	-0.14	-0.14	N/A
VAV3	ENST00000370056.4	vav 3 guanine nucleotide exchange factor	1128	1	0	0	1	0	hsa-miR-593-5p	-0.14	-0.14	N/A
ASB6	ENST00000277459.4	ankyrin repeat and SOCS box containing 6	725	2	0	1	1	1	hsa-miR-593-5p	-0.14	-0.24	N/A
PRKCI	ENST00000295797.4	protein kinase C, iota	103	1	0	0	1	0	hsa-miR-593-5p	-0.14	-0.14	N/A
C5orf24	ENST00000394976.3	chromosome 5 open reading frame 24	2668	1	0	0	1	0	hsa-miR-593-5p	-0.14	-0.14	N/A
FRS2	ENST00000550389.1	fibroblast growth factor receptor substrate 2	176	1	0	1	0	0	hsa-miR-593-5p	-0.14	-0.19	N/A
PABPN1	ENST00000397276.2	poly(A) binding protein, nuclear 1	110	1	0	1	0	0	hsa-miR-593-5p	-0.14	-0.14	N/A
ZNF736	ENST00000423484.2	zinc finger protein 736	36	1	0	0	1	0	hsa-miR-593-5p	-0.14	-0.14	N/A
ANKIB1	ENST00000265742.3	ankyrin repeat and IBR domain containing 1	127	1	0	0	1	0	hsa-miR-593-5p	-0.14	-0.14	N/A
USF1	ENST00000368020.1	upstream transcription factor 1	5	1	0	1	0	0	hsa-miR-593-5p	-0.14	-0.14	N/A
PEAK1	ENST00000312493.4	pseudopodium-enriched atypical kinase 1	209	3	1	1	1	0	hsa-miR-593-5p	-0.14	-0.16	N/A
EP400	ENST00000333577.4	E1A binding protein p400	1798	1	0	1	0	0	hsa-miR-593-5p	-0.14	-0.14	N/A
ZNF383	ENST00000352998.3	zinc finger protein 383	147	1	1	0	0	0	hsa-miR-593-5p	-0.14	-0.2	N/A
SYAP1	ENST00000380155.3	synapse associated protein 1	2689	1	1	0	0	0	hsa-miR-593-5p	-0.14	-0.23	N/A
RAB3D	ENST00000222120.3	RAB3D, member RAS oncogene family	111	1	0	1	0	0	hsa-miR-593-5p	-0.14	-0.14	N/A
HMG20A	ENST00000336216.4	high mobility group 20A	391	1	0	0	1	0	hsa-miR-593-5p	-0.14	-0.14	N/A
ZNF486	ENST00000335117.8	zinc finger protein 486	10	1	0	0	1	0	hsa-miR-593-5p	-0.14	-0.14	N/A
HNRNPUL2	ENST00000301785.5	heterogeneous nuclear ribonucleoprotein U-like 2	2321	1	0	0	1	0	hsa-miR-593-5p	-0.14	-0.14	N/A
NHSL2	ENST00000540800.1	NHS-like 2	5	1	0	0	1	1	hsa-miR-593-5p	-0.14	-0.14	N/A
METTL6	ENST00000443029.1	methyltransferase like 6	20	1	0	1	0	0	hsa-miR-593-5p	-0.14	-0.14	N/A
CCNYL1	ENST00000295414.3	cyclin Y-like 1	111	1	0	1	0	0	hsa-miR-593-5p	-0.14	-0.16	N/A
KDM4B	ENST00000159111.4	lysine (K)-specific demethylase 4B	547	1	1	0	0	3	hsa-miR-593-5p	-0.14	-0.14	N/A
C21orf59	ENST00000382549.4	chromosome 21 open reading frame 59	288	3	0	3	0	0	hsa-miR-593-5p	-0.14	-0.59	N/A
AC010327.2	ENST00000598855.1	Uncharacterized protein; cDNA FLJ45856 fis, clone OCBBF2025631	7	1	0	0	1	0	hsa-miR-593-5p	-0.14	-0.14	N/A
TRPM5	ENST00000155858.6	transient receptor potential cation channel, subfamily M, member 5	5	1	0	1	0	0	hsa-miR-593-5p	-0.14	-0.14	N/A
RORB	ENST00000376896.3	RAR-related orphan receptor B	5	1	0	0	1	0	hsa-miR-593-5p	-0.14	-0.14	N/A
FHDC1	ENST00000260008.3	FH2 domain containing 1	53	1	1	0	0	0	hsa-miR-593-5p	-0.14	-0.14	N/A
CHERP	ENST00000546361.2	calcium homeostasis endoplasmic reticulum protein	614	1	0	0	1	1	hsa-miR-593-5p	-0.14	-0.14	N/A
SEC14L6	ENST00000402034.2	SEC14-like 6 (S. cerevisiae)	14	1	0	1	0	0	hsa-miR-593-5p	-0.14	-0.14	N/A
PRNP	ENST00000379440.4	prion protein	1136	1	0	1	0	0	hsa-miR-593-5p	-0.14	-0.14	N/A
DAB1	ENST00000371236.2	Dab, reelin signal transducer, homolog 1 (Drosophila)	490	1	0	0	1	0	hsa-miR-593-5p	-0.13	-0.21	N/A
MPP6	ENST00000222644.5	membrane protein, palmitoylated 6 (MAGUK p55 subfamily member 6)	389	2	0	0	2	0	hsa-miR-593-5p	-0.13	-0.22	N/A
GPX8	ENST00000296734.6	glutathione peroxidase 8 (putative)	2107	1	1	0	0	0	hsa-miR-593-5p	-0.13	-0.28	N/A
CTD-2207O23.12	ENST00000599312.1	Uncharacterized protein	32	1	0	0	1	0	hsa-miR-593-5p	-0.13	-0.16	N/A
EFCAB11	ENST00000316738.7	EF-hand calcium binding domain 11	25	2	2	0	0	1	hsa-miR-593-5p	-0.13	-0.83	N/A
ZKSCAN5	ENST00000394170.2	zinc finger with KRAB and SCAN domains 5	53	2	1	1	0	1	hsa-miR-593-5p	-0.13	-0.47	N/A
UBAC1	ENST00000371756.3	UBA domain containing 1	52	1	0	1	0	0	hsa-miR-593-5p	-0.13	-0.22	N/A
GRIK5	ENST00000262895.3	glutamate receptor, ionotropic, kainate 5	5	1	0	1	0	1	hsa-miR-593-5p	-0.13	-0.13	N/A
RNF165	ENST00000269439.7	ring finger protein 165	18	1	0	1	0	2	hsa-miR-593-5p	-0.13	-0.13	N/A
RNF157	ENST00000269391.6	ring finger protein 157	163	2	0	2	0	0	hsa-miR-593-5p	-0.13	-0.15	N/A
MAPK1	ENST00000215832.6	mitogen-activated protein kinase 1	630	2	1	1	0	3	hsa-miR-593-5p	-0.13	-0.34	N/A
TNFRSF10B	ENST00000276431.4	tumor necrosis factor receptor superfamily, member 10b	828	1	0	0	1	0	hsa-miR-593-5p	-0.13	-0.18	N/A
EPHA10	ENST00000540011.1	EPH receptor A10	11	1	0	1	0	0	hsa-miR-593-5p	-0.13	-0.31	N/A
KRTAP4-9	ENST00000391415.1	keratin associated protein 4-9	10	1	0	1	0	1	hsa-miR-593-5p	-0.13	-0.27	N/A
ZNF528	ENST00000360465.3	zinc finger protein 528	15	1	0	1	0	0	hsa-miR-593-5p	-0.13	-0.16	N/A
PRR3	ENST00000376560.3	proline rich 3	1145	1	0	1	0	0	hsa-miR-593-5p	-0.13	-0.14	N/A
MATK	ENST00000395040.2	megakaryocyte-associated tyrosine kinase	24	1	0	1	0	0	hsa-miR-593-5p	-0.13	-0.13	N/A
SSTR1	ENST00000267377.2	somatostatin receptor 1	28	1	0	1	0	1	hsa-miR-593-5p	-0.13	-0.13	N/A
KCNJ9	ENST00000368088.3	potassium inwardly-rectifying channel, subfamily J, member 9	5	1	0	0	1	2	hsa-miR-593-5p	-0.13	-0.13	N/A
NOS3	ENST00000297494.3	nitric oxide synthase 3 (endothelial cell)	229	1	0	1	0	0	hsa-miR-593-5p	-0.13	-0.13	N/A
ZNF853	ENST00000457543.3	zinc finger protein 853	8	1	0	1	0	0	hsa-miR-593-5p	-0.13	-0.13	N/A
LRIG1	ENST00000273261.3	leucine-rich repeats and immunoglobulin-like domains 1	241	1	0	1	0	0	hsa-miR-593-5p	-0.13	-0.13	N/A
SPRTN	ENST00000391858.4	SprT-like N-terminal domain	1128	1	0	1	0	0	hsa-miR-593-5p	-0.13	-0.15	N/A
SLC30A6	ENST00000282587.5	solute carrier family 30 (zinc transporter), member 6	711	1	0	0	1	0	hsa-miR-593-5p	-0.13	-0.17	N/A
RNF213	ENST00000582970.1	ring finger protein 213	630	2	1	1	0	0	hsa-miR-593-5p	-0.13	-0.18	N/A
ZNF431	ENST00000311048.7	zinc finger protein 431	93	2	0	1	1	3	hsa-miR-593-5p	-0.13	-0.2	N/A
ZNF653	ENST00000293771.5	zinc finger protein 653	48	1	0	1	0	0	hsa-miR-593-5p	-0.13	-0.13	N/A
STX2	ENST00000392373.2	syntaxin 2	216	1	0	1	0	0	hsa-miR-593-5p	-0.13	-0.14	N/A
MGAT3	ENST00000341184.6	mannosyl (beta-1,4-)-glycoprotein beta-1,4-N-acetylglucosaminyltransferase	9	2	0	1	1	0	hsa-miR-593-5p	-0.13	-0.13	N/A
TMCC3	ENST00000261226.4	transmembrane and coiled-coil domain family 3	70	1	0	0	1	0	hsa-miR-593-5p	-0.13	-0.21	N/A
H6PD	ENST00000377403.2	hexose-6-phosphate dehydrogenase (glucose 1-dehydrogenase)	467	2	1	1	0	1	hsa-miR-593-5p	-0.13	-0.13	N/A
CREBRF	ENST00000540014.1	CREB3 regulatory factor	24	1	0	0	1	0	hsa-miR-593-5p	-0.13	-0.13	N/A
NRSN1	ENST00000378491.4	neurensin 1	5	1	0	0	1	0	hsa-miR-593-5p	-0.13	-0.13	N/A
AMBRA1	ENST00000314845.3	autophagy/beclin-1 regulator 1	35	1	0	1	0	0	hsa-miR-593-5p	-0.13	-0.13	N/A
KCNJ15	ENST00000328656.4	potassium inwardly-rectifying channel, subfamily J, member 15	5	1	0	1	0	0	hsa-miR-593-5p	-0.13	-0.13	N/A
NRP1	ENST00000374875.1	neuropilin 1	586	1	0	0	1	0	hsa-miR-593-5p	-0.13	-0.13	N/A
SORD	ENST00000267814.9	sorbitol dehydrogenase	5	1	0	0	1	1	hsa-miR-593-5p	-0.13	-0.13	N/A
THRA	ENST00000450525.2	thyroid hormone receptor, alpha	547	1	0	0	1	0	hsa-miR-593-5p	-0.13	-0.13	N/A
FAXC	ENST00000389677.5	failed axon connections homolog (Drosophila)	95	1	1	0	0	1	hsa-miR-593-5p	-0.13	-0.21	N/A
PHLDA3	ENST00000367311.3	pleckstrin homology-like domain, family A, member 3	82	2	0	2	0	1	hsa-miR-593-5p	-0.13	-0.3	N/A
SIDT2	ENST00000324225.4	SID1 transmembrane family, member 2	341	1	1	0	0	0	hsa-miR-593-5p	-0.13	-0.13	N/A
ABL1	ENST00000318560.5	c-abl oncogene 1, non-receptor tyrosine kinase	1188	1	1	0	0	1	hsa-miR-593-5p	-0.13	-0.13	N/A
CNTN2	ENST00000331830.4	contactin 2 (axonal)	5	1	1	0	0	0	hsa-miR-593-5p	-0.13	-0.13	N/A
SLFN13	ENST00000285013.6	schlafen family member 13	11	1	0	0	1	0	hsa-miR-593-5p	-0.13	-0.13	N/A
DCTN1	ENST00000361874.3	dynactin 1	1036	1	0	1	0	0	hsa-miR-593-5p	-0.13	-0.13	N/A
GOLGA8A	ENST00000360553.3	golgin A8 family, member A	2264	1	0	0	1	0	hsa-miR-593-5p	-0.13	-0.13	N/A
CCDC85C	ENST00000380243.4	coiled-coil domain containing 85C	86	1	0	0	1	2	hsa-miR-593-5p	-0.13	-0.15	N/A
ISY1-RAB43	ENST00000418265.1	ISY1-RAB43 readthrough	5	1	0	1	0	2	hsa-miR-593-5p	-0.13	-0.13	N/A
BMP3	ENST00000282701.2	bone morphogenetic protein 3	36	1	0	1	0	1	hsa-miR-593-5p	-0.13	-0.19	N/A
NFYB	ENST00000240055.3	nuclear transcription factor Y, beta	375	2	0	2	0	0	hsa-miR-593-5p	-0.13	-0.5	N/A
KIAA1671	ENST00000401395.1	KIAA1671	549	1	0	1	0	0	hsa-miR-593-5p	-0.13	-0.13	N/A
METTL7B	ENST00000394252.3	methyltransferase like 7B	58	1	0	1	0	0	hsa-miR-593-5p	-0.13	-0.26	N/A
ATXN7L3	ENST00000454077.2	ataxin 7-like 3	43	1	0	0	1	0	hsa-miR-593-5p	-0.13	-0.13	N/A
UBXN2B	ENST00000399598.2	UBX domain protein 2B	157	1	0	0	1	0	hsa-miR-593-5p	-0.13	-0.13	N/A
NIN	ENST00000389868.3	ninein (GSK3B interacting protein)	594	1	0	1	0	0	hsa-miR-593-5p	-0.13	-0.13	N/A
PPP1R12B	ENST00000608999.1	protein phosphatase 1, regulatory subunit 12B	18	3	0	2	1	1	hsa-miR-593-5p	-0.13	-0.15	N/A
TC2N	ENST00000435962.2	tandem C2 domains, nuclear	604	1	0	0	1	0	hsa-miR-593-5p	-0.13	-0.2	N/A
SGSM2	ENST00000426855.2	small G protein signaling modulator 2	381	2	0	0	2	0	hsa-miR-593-5p	-0.13	-0.23	N/A
ITPRIP	ENST00000337478.1	inositol 1,4,5-trisphosphate receptor interacting protein	1138	1	0	0	1	1	hsa-miR-593-5p	-0.13	-0.13	N/A
ABCA1	ENST00000374736.3	ATP-binding cassette, sub-family A (ABC1), member 1	184	1	1	0	0	0	hsa-miR-593-5p	-0.13	-0.13	N/A
XKR7	ENST00000562532.2	XK, Kell blood group complex subunit-related family, member 7	5	1	0	0	1	0	hsa-miR-593-5p	-0.13	-0.13	N/A
SYT7	ENST00000263846.4	synaptotagmin VII	192	1	0	1	0	3	hsa-miR-593-5p	-0.13	-0.2	N/A
CPM	ENST00000551568.1	carboxypeptidase M	125	1	0	0	1	1	hsa-miR-593-5p	-0.13	-0.26	N/A
PSAPL1	ENST00000319098.4	prosaposin-like 1 (gene/pseudogene)	25	1	0	1	0	3	hsa-miR-593-5p	-0.13	-0.15	N/A
SFTPA2	ENST00000372325.2	surfactant protein A2	5	2	0	2	0	0	hsa-miR-593-5p	-0.13	-0.13	N/A
MUC21	ENST00000376296.3	mucin 21, cell surface associated	5	1	0	0	1	0	hsa-miR-593-5p	-0.13	-0.13	N/A
ZNF436	ENST00000314011.4	zinc finger protein 436	73	1	0	1	0	0	hsa-miR-593-5p	-0.13	-0.13	N/A
AJAP1	ENST00000378191.4	adherens junctions associated protein 1	5	2	1	1	0	0	hsa-miR-593-5p	-0.13	-0.13	N/A
GNAT1	ENST00000232461.3	guanine nucleotide binding protein (G protein), alpha transducing activity polypeptide 1	8	1	0	0	1	1	hsa-miR-593-5p	-0.13	-0.16	N/A
GPR160	ENST00000355897.5	G protein-coupled receptor 160	22	1	1	0	0	0	hsa-miR-593-5p	-0.13	-0.47	N/A
ATOX1	ENST00000521264.1	antioxidant 1 copper chaperone	43	1	0	1	0	0	hsa-miR-593-5p	-0.13	-0.14	N/A
PRKAR2A	ENST00000265563.8	protein kinase, cAMP-dependent, regulatory, type II, alpha	583	1	0	0	1	0	hsa-miR-593-5p	-0.13	-0.13	N/A
OXSR1	ENST00000311806.3	oxidative stress responsive 1	1790	1	0	1	0	0	hsa-miR-593-5p	-0.13	-0.13	N/A
MTSS1	ENST00000378017.3	metastasis suppressor 1	10	1	0	0	1	0	hsa-miR-593-5p	-0.13	-0.25	N/A
FRAT1	ENST00000371021.3	frequently rearranged in advanced T-cell lymphomas	631	1	0	0	1	0	hsa-miR-593-5p	-0.13	-0.13	N/A
KSR2	ENST00000425217.1	kinase suppressor of ras 2	22	2	0	1	1	4	hsa-miR-593-5p	-0.12	-0.12	N/A
MGLL	ENST00000434178.2	monoglyceride lipase	453	1	0	0	1	0	hsa-miR-593-5p	-0.12	-0.23	N/A
PTK7	ENST00000230419.4	protein tyrosine kinase 7	120	1	0	0	1	0	hsa-miR-593-5p	-0.12	-0.12	N/A
TNFAIP2	ENST00000560869.1	tumor necrosis factor, alpha-induced protein 2	442	1	0	0	1	0	hsa-miR-593-5p	-0.12	-0.12	N/A
TOR1A	ENST00000351698.4	torsin family 1, member A (torsin A)	2491	1	0	1	0	0	hsa-miR-593-5p	-0.12	-0.12	N/A
PPP1R13B	ENST00000423488.2	protein phosphatase 1, regulatory subunit 13B	105	1	0	1	0	0	hsa-miR-593-5p	-0.12	-0.12	N/A
RBM20	ENST00000369519.3	RNA binding motif protein 20	7	1	0	1	0	0	hsa-miR-593-5p	-0.12	-0.12	N/A
RNF222	ENST00000344001.3	ring finger protein 222	5	1	1	0	0	1	hsa-miR-593-5p	-0.12	-0.12	N/A
UBE2S	ENST00000264552.9	ubiquitin-conjugating enzyme E2S	106	2	1	0	1	1	hsa-miR-593-5p	-0.12	-0.64	N/A
DNMT3A	ENST00000380746.4	DNA (cytosine-5-)-methyltransferase 3 alpha	221	2	0	1	1	1	hsa-miR-593-5p	-0.12	-0.3	N/A
RLIM	ENST00000332687.6	ring finger protein, LIM domain interacting	662	2	0	2	0	0	hsa-miR-593-5p	-0.12	-0.21	N/A
SLC5A3	ENST00000608209.1	sodium/myo-inositol cotransporter	24	1	0	0	1	0	hsa-miR-593-5p	-0.12	-0.17	N/A
SLC5A3	ENST00000381151.3	solute carrier family 5 (sodium/myo-inositol cotransporter), member 3	24	1	0	0	1	0	hsa-miR-593-5p	-0.12	-0.17	N/A
RALGPS2	ENST00000367635.3	Ral GEF with PH domain and SH3 binding motif 2	201	1	0	0	1	0	hsa-miR-593-5p	-0.12	-0.13	N/A
SULT1B1	ENST00000310613.3	sulfotransferase family, cytosolic, 1B, member 1	5	1	0	1	0	0	hsa-miR-593-5p	-0.12	-0.12	N/A
ITGA10	ENST00000369304.3	integrin, alpha 10	62	1	0	1	0	1	hsa-miR-593-5p	-0.12	-0.12	N/A
PSCA	ENST00000301258.4	prostate stem cell antigen	14	1	0	1	0	0	hsa-miR-593-5p	-0.12	-0.12	N/A
CPNE7	ENST00000268720.5	copine VII	26	1	0	1	0	0	hsa-miR-593-5p	-0.12	-0.12	N/A
CNTLN	ENST00000380641.4	centlein, centrosomal protein	42	1	0	0	1	0	hsa-miR-593-5p	-0.12	-0.2	N/A
SMC2	ENST00000374793.3	structural maintenance of chromosomes 2	212	1	0	0	1	0	hsa-miR-593-5p	-0.12	-0.2	N/A
SRF	ENST00000265354.4	serum response factor (c-fos serum response element-binding transcription factor)	596	1	0	0	1	0	hsa-miR-593-5p	-0.12	-0.13	N/A
BRWD1	ENST00000342449.3	bromodomain and WD repeat domain containing 1	96	2	0	1	1	0	hsa-miR-593-5p	-0.12	-0.18	N/A
TRMT61A	ENST00000389749.4	tRNA methyltransferase 61 homolog A (S. cerevisiae)	296	1	0	1	0	0	hsa-miR-593-5p	-0.12	-0.12	N/A
STMN3	ENST00000370053.1	stathmin-like 3	17	1	0	1	0	0	hsa-miR-593-5p	-0.12	-0.12	N/A
ARMC5	ENST00000457010.2	armadillo repeat containing 5	376	1	0	1	0	2	hsa-miR-593-5p	-0.12	-0.12	N/A
ERI3	ENST00000372259.5	ERI1 exoribonuclease family member 3	540	1	0	1	0	0	hsa-miR-593-5p	-0.12	-0.12	N/A
ABCA7	ENST00000263094.6	ATP-binding cassette, sub-family A (ABC1), member 7	218	1	0	1	0	0	hsa-miR-593-5p	-0.12	-0.12	N/A
DSCAM	ENST00000400454.1	Down syndrome cell adhesion molecule	5	1	1	0	0	0	hsa-miR-593-5p	-0.12	-0.12	N/A
C4orf50	ENST00000531445.1	chromosome 4 open reading frame 50	5	1	1	0	0	0	hsa-miR-593-5p	-0.12	-0.12	N/A
TMTC1	ENST00000256062.5	transmembrane and tetratricopeptide repeat containing 1	379	1	0	1	0	0	hsa-miR-593-5p	-0.12	-0.12	N/A
NPEPL1	ENST00000356091.6	aminopeptidase-like 1	134	1	0	1	0	0	hsa-miR-593-5p	-0.12	-0.16	N/A
ERN1	ENST00000433197.3	endoplasmic reticulum to nucleus signaling 1	182	1	0	0	1	1	hsa-miR-593-5p	-0.12	-0.12	N/A
SH3BP4	ENST00000392011.2	SH3-domain binding protein 4	783	1	0	0	1	1	hsa-miR-593-5p	-0.12	-0.12	N/A
KANSL3	ENST00000431828.1	KAT8 regulatory NSL complex subunit 3	121	1	0	0	1	0	hsa-miR-593-5p	-0.12	-0.12	N/A
GPR176	ENST00000299092.3	G protein-coupled receptor 176	2683	1	0	1	0	0	hsa-miR-593-5p	-0.12	-0.12	N/A
CTNNA3	ENST00000433211.2	catenin (cadherin-associated protein), alpha 3	5	2	0	1	1	0	hsa-miR-593-5p	-0.12	-0.12	N/A
ARHGEF37	ENST00000333677.6	Rho guanine nucleotide exchange factor (GEF) 37	5	1	1	0	0	0	hsa-miR-593-5p	-0.12	-0.12	N/A
REXO1L1	ENST00000379010.2	REX1, RNA exonuclease 1 homolog (S. cerevisiae)-like 1	5	1	0	0	1	0	hsa-miR-593-5p	-0.12	-0.12	N/A
CAND1	ENST00000545606.1	cullin-associated and neddylation-dissociated 1	1568	1	1	0	0	0	hsa-miR-593-5p	-0.12	-0.33	N/A
ECM1	ENST00000369047.4	extracellular matrix protein 1	575	1	0	1	0	0	hsa-miR-593-5p	-0.12	-0.2	N/A
WISP1	ENST00000250160.6	WNT1 inducible signaling pathway protein 1	5	2	1	1	0	1	hsa-miR-593-5p	-0.12	-0.45	N/A
XRRA1	ENST00000527087.1	X-ray radiation resistance associated 1	136	2	0	1	1	0	hsa-miR-593-5p	-0.12	-0.24	N/A
NUP214	ENST00000359428.5	nucleoporin 214kDa	452	1	0	0	1	0	hsa-miR-593-5p	-0.12	-0.14	N/A
SIRT3	ENST00000382743.4	sirtuin 3	408	1	0	1	0	0	hsa-miR-593-5p	-0.12	-0.12	N/A
ITPK1	ENST00000267615.6	inositol-tetrakisphosphate 1-kinase	60	1	0	0	1	0	hsa-miR-593-5p	-0.12	-0.12	N/A
CHST10	ENST00000264249.3	carbohydrate sulfotransferase 10	33	1	0	1	0	0	hsa-miR-593-5p	-0.12	-0.12	N/A
ZNF526	ENST00000301215.3	zinc finger protein 526	256	1	0	1	0	0	hsa-miR-593-5p	-0.12	-0.12	N/A
LDB1	ENST00000361198.5	LIM domain binding 1	61	1	0	0	1	0	hsa-miR-593-5p	-0.12	-0.12	N/A
TTC22	ENST00000371276.4	tetratricopeptide repeat domain 22	5	1	0	0	1	0	hsa-miR-593-5p	-0.12	-0.12	N/A
CSNK1A1	ENST00000261798.5	casein kinase 1, alpha 1	769	1	1	0	0	0	hsa-miR-593-5p	-0.12	-0.39	N/A
VPS37B	ENST00000267202.2	vacuolar protein sorting 37 homolog B (S. cerevisiae)	261	1	0	0	1	2	hsa-miR-593-5p	-0.12	-0.12	N/A
SRP68	ENST00000307877.2	signal recognition particle 68kDa	989	1	0	1	0	0	hsa-miR-593-5p	-0.12	-0.2	N/A
TMEM86B	ENST00000327042.4	transmembrane protein 86B	2783	1	0	1	0	0	hsa-miR-593-5p	-0.12	-0.13	N/A
TIFAB	ENST00000537858.1	TRAF-interacting protein with forkhead-associated domain, family member B	5	1	0	0	1	0	hsa-miR-593-5p	-0.12	-0.12	N/A
SCN11A	ENST00000444237.2	sodium channel, voltage-gated, type XI, alpha subunit	5	1	0	0	1	0	hsa-miR-593-5p	-0.12	-0.12	N/A
PBX4	ENST00000251203.9	pre-B-cell leukemia homeobox 4	11	1	0	1	0	0	hsa-miR-593-5p	-0.12	-0.12	N/A
GPC6	ENST00000377047.4	glypican 6	410	1	0	0	1	0	hsa-miR-593-5p	-0.12	-0.12	N/A
BCL2L1	ENST00000376062.2	BCL2-like 1	7726	1	0	1	0	0	hsa-miR-593-5p	-0.12	-0.12	N/A
CLEC2D	ENST00000261340.7	C-type lectin domain family 2, member D	11	1	0	1	0	0	hsa-miR-593-5p	-0.12	-0.23	N/A
CCNT1	ENST00000261900.3	cyclin T1	86	1	1	0	0	0	hsa-miR-593-5p	-0.12	-0.14	N/A
GOLGA3	ENST00000204726.3	golgin A3	944	1	0	0	1	1	hsa-miR-593-5p	-0.12	-0.13	N/A
C2orf48	ENST00000381786.3	chromosome 2 open reading frame 48	32	1	0	1	0	1	hsa-miR-593-5p	-0.12	-0.13	N/A
RBPMS2	ENST00000560606.1	RNA binding protein with multiple splicing 2	34	1	0	1	0	0	hsa-miR-593-5p	-0.12	-0.12	N/A
TSPAN11	ENST00000261177.9	tetraspanin 11	27	1	0	0	1	2	hsa-miR-593-5p	-0.12	-0.12	N/A
RBM19	ENST00000545145.2	RNA binding motif protein 19	217	1	0	0	1	1	hsa-miR-593-5p	-0.12	-0.12	N/A
MPO	ENST00000225275.3	myeloperoxidase	5	1	0	1	0	0	hsa-miR-593-5p	-0.12	-0.12	N/A
KIAA1024	ENST00000305428.3	KIAA1024	5	1	0	0	1	0	hsa-miR-593-5p	-0.12	-0.12	N/A
TRAF7	ENST00000326181.6	TNF receptor-associated factor 7, E3 ubiquitin protein ligase	1505	1	0	0	1	0	hsa-miR-593-5p	-0.12	-0.12	N/A
EFNA3	ENST00000505139.1	Ephrin-A3; Uncharacterized protein; cDNA FLJ57652, highly similar to Ephrin-A3	9	2	0	1	1	0	hsa-miR-593-5p	-0.12	-0.29	N/A
FAM211A	ENST00000409083.3	family with sequence similarity 211, member A	23	1	0	1	0	0	hsa-miR-593-5p	-0.12	-0.16	N/A
ZNF621	ENST00000339296.5	zinc finger protein 621	39	2	0	1	1	0	hsa-miR-593-5p	-0.12	-0.13	N/A
ABR	ENST00000302538.5	active BCR-related	58	2	0	1	1	0	hsa-miR-593-5p	-0.12	-0.16	N/A
GNS	ENST00000418919.2	glucosamine (N-acetyl)-6-sulfatase	2435	1	0	1	0	0	hsa-miR-593-5p	-0.12	-0.14	N/A
KIAA1456	ENST00000524591.2	KIAA1456	24	2	0	1	1	0	hsa-miR-593-5p	-0.12	-0.23	N/A
RAP1GAP2	ENST00000254695.8	RAP1 GTPase activating protein 2	123	1	0	0	1	0	hsa-miR-593-5p	-0.12	-0.18	N/A
AC105020.1	ENST00000435356.1	Uncharacterized protein; cDNA FLJ12988 fis, clone NT2RP3000080	5	1	0	1	0	0	hsa-miR-593-5p	-0.12	-0.12	N/A
THOP1	ENST00000307741.6	thimet oligopeptidase 1	15	1	0	1	0	0	hsa-miR-593-5p	-0.12	-0.12	N/A
TARDBP	ENST00000240185.3	TAR DNA binding protein	410	1	0	1	0	0	hsa-miR-593-5p	-0.12	-0.12	N/A
TGFBRAP1	ENST00000393359.2	transforming growth factor, beta receptor associated protein 1	435	1	0	0	1	0	hsa-miR-593-5p	-0.12	-0.12	N/A
SLC22A3	ENST00000392145.1	solute carrier family 22 (organic cation transporter), member 3	86	1	0	1	0	0	hsa-miR-593-5p	-0.12	-0.14	N/A
ARHGAP32	ENST00000310343.9	Rho GTPase activating protein 32	16	1	0	0	1	0	hsa-miR-593-5p	-0.12	-0.2	N/A
ISG20	ENST00000306072.5	interferon stimulated exonuclease gene 20kDa	116	2	1	0	1	0	hsa-miR-593-5p	-0.12	-0.72	N/A
TDRP	ENST00000324079.6	testis development related protein	235	1	0	0	1	0	hsa-miR-593-5p	-0.12	-0.18	N/A
TMEM185B	ENST00000426077.2	transmembrane protein 185B	1146	1	1	0	0	0	hsa-miR-593-5p	-0.12	-0.18	N/A
RASA4	ENST00000262940.7	RAS p21 protein activator 4	5	1	0	0	1	0	hsa-miR-593-5p	-0.12	-0.12	N/A
SRPX2	ENST00000373004.3	sushi-repeat containing protein, X-linked 2	69	1	1	0	0	0	hsa-miR-593-5p	-0.12	-0.38	N/A
PDK2	ENST00000503176.1	pyruvate dehydrogenase kinase, isozyme 2	681	3	2	1	0	4	hsa-miR-593-5p	-0.12	-0.69	N/A
ZIC3	ENST00000287538.5	Zic family member 3	9	1	0	1	0	0	hsa-miR-593-5p	-0.12	-0.29	N/A
CERS1	ENST00000427170.2	ceramide synthase 1	167	1	0	1	0	1	hsa-miR-593-5p	-0.12	-0.12	N/A
NPTX1	ENST00000306773.4	neuronal pentraxin I	1876	1	1	0	0	0	hsa-miR-593-5p	-0.12	-0.12	N/A
FBXO32	ENST00000517956.1	F-box protein 32	500	1	1	0	0	0	hsa-miR-593-5p	-0.12	-0.29	N/A
RFX3	ENST00000382004.3	regulatory factor X, 3 (influences HLA class II expression)	37	1	0	1	0	0	hsa-miR-593-5p	-0.12	-0.16	N/A
MLLT6	ENST00000325718.7	myeloid/lymphoid or mixed-lineage leukemia (trithorax homolog, Drosophila); translocated to, 6	24	1	0	1	0	2	hsa-miR-593-5p	-0.12	-0.19	N/A
ZHX3	ENST00000309060.3	zinc fingers and homeoboxes 3	131	1	0	1	0	1	hsa-miR-593-5p	-0.12	-0.24	N/A
HS3ST1	ENST00000002596.5	heparan sulfate (glucosamine) 3-O-sulfotransferase 1	9	1	0	0	1	0	hsa-miR-593-5p	-0.12	-0.21	N/A
UQCR11	ENST00000589880.1	ubiquinol-cytochrome c reductase, complex III subunit XI	34490	1	0	0	1	2	hsa-miR-593-5p	-0.12	-0.3	N/A
KNDC1	ENST00000304613.3	kinase non-catalytic C-lobe domain (KIND) containing 1	5	1	0	0	1	1	hsa-miR-593-5p	-0.12	-0.12	N/A
STXBP5L	ENST00000273666.6	syntaxin binding protein 5-like	19	1	0	0	1	0	hsa-miR-593-5p	-0.12	-0.12	N/A
MLST8	ENST00000301725.7	MTOR associated protein, LST8 homolog (S. cerevisiae)	493	1	0	1	0	0	hsa-miR-593-5p	-0.12	-0.12	N/A
B3GALT6	ENST00000379198.2	UDP-Gal:betaGal beta 1,3-galactosyltransferase polypeptide 6	2444	1	0	1	0	2	hsa-miR-593-5p	-0.12	-0.36	N/A
PDCD4	ENST00000280154.7	programmed cell death 4 (neoplastic transformation inhibitor)	612	1	1	0	0	0	hsa-miR-593-5p	-0.12	-0.34	N/A
ZBTB8B	ENST00000609129.1	zinc finger and BTB domain containing 8B	18	1	0	1	0	0	hsa-miR-593-5p	-0.12	-0.12	N/A
UVRAG	ENST00000356136.3	UV radiation resistance associated	116	1	0	1	0	1	hsa-miR-593-5p	-0.11	-0.23	N/A
CNNM2	ENST00000369878.4	cyclin M2	517	6	0	5	1	2	hsa-miR-593-5p	-0.11	-0.47	N/A
GTPBP1	ENST00000216044.5	GTP binding protein 1	1765	1	0	1	0	0	hsa-miR-593-5p	-0.11	-0.12	N/A
IPCEF1	ENST00000265198.4	interaction protein for cytohesin exchange factors 1	16	1	0	1	0	0	hsa-miR-593-5p	-0.11	-0.11	N/A
MCF2L2	ENST00000328913.3	MCF.2 cell line derived transforming sequence-like 2	5	1	0	0	1	0	hsa-miR-593-5p	-0.11	-0.11	N/A
FAM196A	ENST00000522781.1	family with sequence similarity 196, member A	5	1	0	1	0	0	hsa-miR-593-5p	-0.11	-0.11	N/A
KCNJ5	ENST00000529694.1	potassium inwardly-rectifying channel, subfamily J, member 5	12	1	1	0	0	2	hsa-miR-593-5p	-0.11	-0.18	N/A
LDLR	ENST00000558518.1	low density lipoprotein receptor	1462	1	0	1	0	1	hsa-miR-593-5p	-0.11	-0.13	N/A
GNPNAT1	ENST00000216410.3	glucosamine-phosphate N-acetyltransferase 1	429	1	0	1	0	0	hsa-miR-593-5p	-0.11	-0.21	N/A
SLC7A5	ENST00000565644.1	solute carrier family 7 (amino acid transporter light chain, L system), member 5	155	2	0	1	1	1	hsa-miR-593-5p	-0.11	-0.17	N/A
DDX6	ENST00000264018.4	DEAD (Asp-Glu-Ala-Asp) box helicase 6	11	1	1	0	0	0	hsa-miR-593-5p	-0.11	-0.22	N/A
CD300LF	ENST00000361254.4	CD300 molecule-like family member f	5	1	0	1	0	0	hsa-miR-593-5p	-0.11	-0.11	N/A
ZKSCAN4	ENST00000377294.2	zinc finger with KRAB and SCAN domains 4	139	2	1	0	1	0	hsa-miR-593-5p	-0.11	-0.28	N/A
FKBP14	ENST00000222803.5	FK506 binding protein 14, 22 kDa	939	1	0	1	0	0	hsa-miR-593-5p	-0.11	-0.14	N/A
RFC2	ENST00000352131.3	replication factor C (activator 1) 2, 40kDa	411	1	1	0	0	2	hsa-miR-593-5p	-0.11	-0.39	N/A
ENTPD5	ENST00000334696.6	ectonucleoside triphosphate diphosphohydrolase 5	105	2	0	0	2	1	hsa-miR-593-5p	-0.11	-0.32	N/A
VPS37A	ENST00000324849.4	vacuolar protein sorting 37 homolog A (S. cerevisiae)	339	1	0	0	1	0	hsa-miR-593-5p	-0.11	-0.2	N/A
SAE1	ENST00000392776.3	SUMO1 activating enzyme subunit 1	87	1	0	1	0	1	hsa-miR-593-5p	-0.11	-0.11	N/A
FOXI2	ENST00000388920.4	forkhead box I2	5	1	0	1	0	1	hsa-miR-593-5p	-0.11	-0.11	N/A
HEBP2	ENST00000607197.1	heme binding protein 2	252	5	1	0	4	0	hsa-miR-593-5p	-0.11	-0.65	N/A
CDC5L	ENST00000371477.3	cell division cycle 5-like	115	1	1	0	0	0	hsa-miR-593-5p	-0.11	-0.14	N/A
PURB	ENST00000395699.2	purine-rich element binding protein B	497	1	0	1	0	0	hsa-miR-593-5p	-0.11	-0.21	N/A
KITLG	ENST00000228280.5	KIT ligand	100	1	1	0	0	0	hsa-miR-593-5p	-0.11	-0.28	N/A
HMGXB4	ENST00000216106.5	HMG box domain containing 4	966	1	0	0	1	0	hsa-miR-593-5p	-0.11	-0.11	N/A
JPH1	ENST00000342232.4	junctophilin 1	53	1	0	1	0	0	hsa-miR-593-5p	-0.11	-0.11	N/A
NFIA	ENST00000403491.3	nuclear factor I/A	5	1	0	1	0	1	hsa-miR-593-5p	-0.11	-0.11	N/A
ANKRD13B	ENST00000394859.3	ankyrin repeat domain 13B	72	1	0	1	0	0	hsa-miR-593-5p	-0.11	-0.11	N/A
ZNF341	ENST00000342427.2	zinc finger protein 341	10	1	0	1	0	0	hsa-miR-593-5p	-0.11	-0.11	N/A
PALM	ENST00000338448.5	paralemmin	341	1	0	1	0	0	hsa-miR-593-5p	-0.11	-0.11	N/A
FOXN4	ENST00000355216.1	forkhead box N4	16	1	0	0	1	0	hsa-miR-593-5p	-0.11	-0.15	N/A
ATXN3	ENST00000545170.1	ataxin 3	115	1	1	0	0	1	hsa-miR-593-5p	-0.11	-0.19	N/A
GFRA2	ENST00000524240.1	GDNF family receptor alpha 2	13	2	0	1	1	0	hsa-miR-593-5p	-0.11	-0.26	N/A
LIMD2	ENST00000259006.3	LIM domain containing 2	90	1	0	1	0	1	hsa-miR-593-5p	-0.11	-0.25	N/A
PRDM6	ENST00000407847.4	PR domain containing 6	69	1	0	1	0	0	hsa-miR-593-5p	-0.11	-0.13	N/A
PRRC2B	ENST00000372249.1	proline-rich coiled-coil 2B	97	1	0	1	0	1	hsa-miR-593-5p	-0.11	-0.12	N/A
PRELP	ENST00000343110.2	proline/arginine-rich end leucine-rich repeat protein	5	1	0	0	1	1	hsa-miR-593-5p	-0.11	-0.11	N/A
DERL3	ENST00000404056.1	derlin 3	129	2	0	1	1	1	hsa-miR-593-5p	-0.11	-0.45	N/A
KIAA1211	ENST00000504228.1	KIAA1211	631	1	0	1	0	0	hsa-miR-593-5p	-0.11	-0.11	N/A
MAP6D1	ENST00000318631.3	MAP6 domain containing 1	45	1	0	1	0	0	hsa-miR-593-5p	-0.11	-0.11	N/A
ITK	ENST00000422843.3	IL2-inducible T-cell kinase	5	1	0	1	0	0	hsa-miR-593-5p	-0.11	-0.11	N/A
ZNF687	ENST00000368879.2	zinc finger protein 687	1250	1	0	1	0	0	hsa-miR-593-5p	-0.11	-0.11	N/A
DSN1	ENST00000426836.1	DSN1, MIS12 kinetochore complex component	350	1	1	0	0	2	hsa-miR-593-5p	-0.11	-0.25	N/A
ACOX1	ENST00000293217.5	acyl-CoA oxidase 1, palmitoyl	287	1	1	0	0	0	hsa-miR-593-5p	-0.11	-0.23	N/A
PPP3CA	ENST00000512215.1	protein phosphatase 3, catalytic subunit, alpha isozyme	259	1	0	1	0	0	hsa-miR-593-5p	-0.11	-0.14	N/A
C2CD4A	ENST00000355522.5	C2 calcium-dependent domain containing 4A	23	1	0	0	1	0	hsa-miR-593-5p	-0.11	-0.21	N/A
GABRA4	ENST00000264318.3	gamma-aminobutyric acid (GABA) A receptor, alpha 4	5	1	0	0	1	0	hsa-miR-593-5p	-0.11	-0.11	N/A
KIF21B	ENST00000332129.2	kinesin family member 21B	12	1	0	0	1	3	hsa-miR-593-5p	-0.11	-0.11	N/A
PCDH12	ENST00000231484.3	protocadherin 12	5	1	0	0	1	1	hsa-miR-593-5p	-0.11	-0.11	N/A
ERLIN2	ENST00000276461.5	ER lipid raft associated 2	887	1	0	1	0	0	hsa-miR-593-5p	-0.11	-0.13	N/A
VSIG10	ENST00000359236.5	V-set and immunoglobulin domain containing 10	355	2	0	1	1	0	hsa-miR-593-5p	-0.11	-0.36	N/A
ABCC5	ENST00000334444.6	ATP-binding cassette, sub-family C (CFTR/MRP), member 5	453	1	0	0	1	0	hsa-miR-593-5p	-0.11	-0.12	N/A
DPYSL5	ENST00000288699.6	dihydropyrimidinase-like 5	315	2	1	1	0	1	hsa-miR-593-5p	-0.11	-0.13	N/A
SDAD1	ENST00000356260.5	SDA1 domain containing 1	91	1	0	1	0	0	hsa-miR-593-5p	-0.11	-0.23	N/A
TPCN1	ENST00000335509.6	two pore segment channel 1	401	1	0	1	0	2	hsa-miR-593-5p	-0.11	-0.11	N/A
[truncated: 1,494 more rows]

## Sheet: microRNA
mirbase_acc	mirna_name	gene_id	gene_symbol	transcript_id	ext_transcript_id	mirna_alignment	alignment	gene_alignment	mirna_start	mirna_end	gene_start	gene_end	genome_coordinates	conservation	align_score	seed_cat	energy	mirsvr_score
MIMAT0003261	hsa-miR-593*	6638	SNRPN	uc001yyb.3	AF400487	cgaCUCGUUACGGAC-CGACCACGGa	| | | | :|| |:|||||||	gagGUGGAUUUGUUGAGUUGGUGCCa	2	23	3276	3301	[hg19:15:25364226-25364251:+]	0.7134	153	7	-22.89	-0.1893
MIMAT0003261	hsa-miR-593*	2915	GRM5	uc001pcq.2	NM_001143831	cgacucguuacggacCGACCACGGa	| |||||||	uagauguuuuagaaaGAUGGUGCCa	2	11	3643	3667	[hg19:11:88238093-88238117:-]	0.7819	142	7	-15.87	-1.0688
MIMAT0003261	hsa-miR-593*	50859	SPOCK3	uc003iri.1	NM_016950	cgaCUCGUUACGGACCGACCACGGa	||| | | :|| |||||||	uuaGAGAACUUAUUGUAUGGUGCCu	2	23	954	978	[hg19:4:167655094-167655118:-]	0.6565	158	7	-22.19	-1.0867
MIMAT0003261	hsa-miR-593*	26036	ZNF451	uc003pdp.2	AK027074	cgACUCGUUAC-GGACCGACCACGGa	| | ::||| ::| ||||||||	ggUAAUUGAUGUUUUCUCUGGUGCCa	2	24	3571	3596	[hg19:6:56968589-56968614:+]	0.5725	158	7	-20.2	-0.1442
MIMAT0003261	hsa-miR-593*	79863	C18orf22	uc010drh.2	AF439745	cgACUCGUUACGGACCGACCACGGa	||| | : |||||:|||||||	gaUGACCUGGACCUGGUUGGUGCCc	2	24	93	117	[hg19:18:77806030-77806054:+]	0.4587	175	7	-30.8	-0.1151
MIMAT0003261	hsa-miR-593*	115825	WDFY2	uc010adt.1	AK311177	cgacUCGUUACGGAC-CGACCACGGa	:|: :|| | | :|||||||	cccaGGUCGUGGCGGUUUUGGUGCCu	2	22	135	160	[hg19:13:52158618-52158643:+]	0.6365	148	7	-23.76	-0.1885
MIMAT0003261	hsa-miR-593*	9878	TOX4	uc001way.2	BC035050	cgACUCGUUACG-GACCGACCACGga	| ||| | | | :||||||	uaUUAGCUUUUCAAUUCUUGGUGCaa	3	24	277	302	[hg19:14:21963832-21963857:+]	0.5499	126	0	-15.88	-0.118
MIMAT0003261	hsa-miR-593*	3805	KIR2DL4	uc010esd.2	AF002982	cgacucguuacggaccGACCACGGa	||||||||	uccucacaccacaaauCUGGUGCCu	2	10	295	319	[hg19:19:55325599-55325623:+]	0.5105	145	7	-18.67	-0.2801
MIMAT0003261	hsa-miR-593*	57026	PDXP	uc003atj.1	AK126873	cgacuCGUUACGGACC--GACCACGGa	| ||| |: || ||||||||	uccuuGAAAU-CUGGGCCCUGGUGCCu	2	21	272	297	[hg19:22:38062150-38062175:+]	0.5587	153	7	-25.15	-0.1106
MIMAT0003261	hsa-miR-593*	400966	RGPD1	uc010fhc.1	NM_001024457	cgacUCGUUAC-GGACCG-ACCACGGa	| | ||| :|| : |||||||	aagcAACCAUGUUCUACUAUGGUGCCa	2	22	2	28	[hg19:2:88056883-88056909:-]	0.6418	147	7	-19.41	-1.26
MIMAT0003261	hsa-miR-593*	400966	RGPD1	uc010fhc.1	NM_001024457	cgACUCGUUACGGACC---GACCA-CGGa	|||| || || ||| :|||| |||	cuUGAG-AA-GCAUGGAUUUUGGUAGCCa	2	24	348	374	[hg19:2:88056537-88056563:-]	0.5933	122	0	-20.54	-0.424
MIMAT0003261	hsa-miR-593*	84502	JPH4	uc001wkr.2	NM_001146028	cgacucguuacGGACCGAC-CACGGa	::|||:|| |||||	cugguucuggcUUUGGUUGCGUGCCu	2	15	15	40	[hg19:14:24038803-24038828:-]	0.6069	122	0	-27.06	-0.3207
MIMAT0003261	hsa-miR-593*	3190	HNRNPK	uc004anj.3	CR621069	cgACU-CGUUACGGACCGAC-CACGGa	||| || | | :| | || |||||	caUGAUGCUA-GAUUUGAUGUGUGCCc	2	24	1163	1188	[hg19:9:86583077-86583102:-]	0.6322	120	0	-16.04	-0.9145
MIMAT0003261	hsa-miR-593*	643853	TMPPE	uc003cfk.2	NM_001039770	cgACUCGU-UA-CGGACCGACCACGGa	| | || :| | || | |||||||	uuUCACCAGGUGGGCUAGAUGGUGCCa	2	24	1739	1765	[hg19:3:33132561-33132587:-]	0.5274	153	7	-18.81	-0.2927
MIMAT0003261	hsa-miR-593*	23279	NUP160	uc001ngm.2	NM_015231	cgacuCGUUACGGACCGACCACGGa	|:|| || | :|||||||	ccuuuGUAA--CC-GCUUGGUGCCu	2	21	18	39	[hg19:11:47800618-47800639:-]	0.7144	147	7	-21.87	-0.6579
MIMAT0003261	hsa-miR-593*	1982	EIF4G2	uc001mjc.2	NM_001418	cgacuCGUUAC--GGACCGACCACGGa	|||| | |:| :|| ||||	cuauuGCAAGGACCUUCUUUGCUGCCa	2	21	276	302	[hg19:11:10819061-10819087:-]	0.7975	123	0	-14.45	-0.1081
MIMAT0003261	hsa-miR-593*	90952	ESAM	uc009zbi.2	CR607273	cgaCUCGUUACGGAC-CGACCACGGa	| || :|||||| | |||||||	uggGUGCUGUGCCUGUGAUGGUGCCu	2	23	124	149	[hg19:11:124623572-124623597:-]	0.7219	173	7	-31.88	-0.3095
MIMAT0003261	hsa-miR-593*	8932	MBD2	uc002lfh.1	NM_015832	cgacucguuACGGACCGACCACGGa	|||:| |||||||:	---------UGCUUCCCUGGUGCUu	2	17	1	16	[hg19:18:51729250-51729265:-]	0.6207	144	0	-19.69	-0.1351
MIMAT0003261	hsa-miR-593*	91408	BTF3L4	uc001ctk.2	NM_152265	cgACUCGUUACGGAC--C--GACCACGga	||: ||| : || | :||||||	uuUGGUCAAAAUAUGAAGUAUUGGUGCag	3	24	194	222	[hg19:1:52552624-52552652:+]	0.7385	125	0	-15.99	-0.1109
MIMAT0003261	hsa-miR-593*	91408	BTF3L4	uc001ctk.2	NM_152265	cgacUCGU-UACGGACCG-ACC-ACGGa	| || || ::|||: ||| ||||	ggguAACAUAUCUUUGGUAUGGUUGCCu	2	22	592	619	[hg19:1:52553022-52553049:+]	0.6097	123	0	-21.11	-0.6904
MIMAT0003261	hsa-miR-593*	340156	MYLK4	uc003mty.3	NM_001012418	cgacucguUACGGACCGAC-CACGGa	|||:|| |:|| |||||	uaacacucAUGUCU-GUUGAGUGCCa	2	18	3134	3158	[hg19:6:2665001-2665025:-]	0.5469	127	0	-20.34	-0.395
MIMAT0003261	hsa-miR-593*	56917	MEIS3	uc002pgs.2	NM_020160	cgACUCGUUACGGACCGAC-CACGGa	||:| ||| | ||| |||||	gcUGGGACAUGGGGGCCUGAGUGCCc	2	24	138	163	[hg19:19:47906665-47906690:-]	0.5772	127	0	-26.64	-0.1266
MIMAT0003261	hsa-miR-593*	54707	GPN2	uc001bnd.1	NM_018066	cgacucgUUACGGACCG-ACCACGGa	|| ||| | | |||||||	uggccaaAAAGCCAGACAUGGUGCCa	2	19	148	173	[hg19:1:27205995-27206020:-]	0.5428	157	7	-19.47	-0.542
MIMAT0003261	hsa-miR-593*	2584	GALK1	uc010wsj.1	AK303748	cgacucguuacGGACCGACCACGGa	|| | ||||||||	guccuuggagaCCAGCCUGGUGCCa	2	15	424	448	[hg19:17:73758942-73758966:-]	0.7175	154	7	-21.08	-0.2793
MIMAT0003261	hsa-miR-593*	80176	SPSB1	uc010oae.1	NM_025106	cgacucguuacggaccGACCACGGa	:|||||||	uuuuuaaagcacaaaaUUGGUGCCa	2	10	1562	1586	[hg19:1:9429196-9429220:+]	0.6748	141	7	-16.05	-1.0933
MIMAT0003261	hsa-miR-593*	23428	SLC7A8	uc001wiz.2	NM_012244	cgacucGUUACGGACCG-ACCACGGa	||: || | |||||||	ugcaucCAGCCCCCAACAUGGUGCCa	2	20	701	726	[hg19:14:23595660-23595685:-]	0.6242	142	7	-17.53	-0.461
MIMAT0003261	hsa-miR-593*	5210	PFKFB4	uc003ctv.2	NM_004567	cgACUCGUUACGGACCGACC-ACGGa	|||| :| ||| :||| ||||	gcUGAGGUGUAGCUGAUUGGCUGCCa	2	24	1903	1928	[hg19:3:48555252-48555277:-]	0.5459	131	0	-25.07	-0.3105
MIMAT0003261	hsa-miR-593*	5210	PFKFB4	uc003ctv.2	NM_004567	cgACUCGUUACGGACCGAC--CACGGa	| :|| ||| ||||||| |||||	uuUCGGCCAUG-CUGGCUGGCGUGCCc	2	24	1931	1956	[hg19:3:48555224-48555249:-]	0.5763	129	0	-26.21	-0.1165
MIMAT0003261	hsa-miR-593*	2125	EVPL	uc002jqi.2	NM_001988	cgacucguuacggaccGACCACGGa	:|||||||	gcucccuccccuaaccUUGGUGCCu	2	10	145	169	[hg19:17:74003015-74003039:-]	0.5083	141	7	-18.64	-0.2441
MIMAT0003261	hsa-miR-593*	10991	SLC38A3	uc011bdl.1	AK299677	cgacUCGUUACGGACCGACCACGGa	| |:| || || |||||||	ccauACCGAGGCGUG--UGGUGCCu	2	22	38	60	[hg19:3:50255875-50255897:+]	0.5428	154	7	-20.72	-0.1344
MIMAT0003261	hsa-miR-593*	10991	SLC38A3	uc011bdl.1	AK299677	cgaCUCGUUACGGACCG--ACCACGGa	|:|| : : |||| |||||||	aagGGGCUGGUUGUGGCCAUGGUGCCc	2	23	10	36	[hg19:3:50255847-50255873:+]	0.5374	153	7	-25.81	-0.2766
MIMAT0003261	hsa-miR-593*	9337	CNOT8	uc003lvw.2	NM_004779	cgaCUCGUUACGGACCGACC-ACGGa	|||| ||| |||| ||||	cucGAGCCUCUCCUCUCUGGUUGCCu	2	23	228	253	[hg19:5:154255227-154255252:+]	0.6549	126	0	-24.52	-0.1619
MIMAT0003261	hsa-miR-593*	50863	NTM	uc001qgq.2	NM_001144058	cgaCUCGUUACGGACCGACCACGGa	| |||| ||| :|||||||	aucGUGCAA--CCUCUUUGGUGCCa	2	23	288	310	[hg19:11:132205328-132205350:+]	0.6452	159	7	-21.66	-0.6152
MIMAT0003261	hsa-miR-593*	3084	NRG1	uc003xiu.2	NM_013956	cgaCUCGUUACGGACCGACCACGGa	||| || : | |||||||	aacGAGAAAGAUAUCAAUGGUGCCu	2	23	194	218	[hg19:8:32622114-32622138:+]	0.771	150	7	-21.06	-1.3069
MIMAT0003261	hsa-miR-593*	55536	CDCA7L	uc010kuk.2	NM_018719	cgacUCGUUACGGACCG--ACCACGGa	|| |||| | | |||||||	aacaAGACAUGCAUACCAUUGGUGCCu	2	22	44	70	[hg19:7:21941870-21941896:-]	0.4981	152	7	-20.83	-0.8506
MIMAT0003261	hsa-miR-593*	85458	DIXDC1	uc001pmm.2	NM_033425	cgACUCGUUACGGA-CCGAC-CACGGa	| || |:| :|| | :|| |||||	acUAAGAAGUUUCUAGUUUGUGUGCCa	2	24	84	110	[hg19:11:111889844-111889870:+]	0.6638	126	0	-17.7	-0.6372
MIMAT0003261	hsa-miR-593*	57620	STIM2	uc010iex.2	BC152554	cgacucguuacggaccgACCACGga	||||||	uaacaaauauaaauuuaUGGUGCau	3	9	1671	1695	[hg19:4:27025780-27025804:+]	0.6097	120	0	-10.24	-0.1734
MIMAT0003261	hsa-miR-593*	3418	IDH2	uc002box.2	NM_002168	cgacucguuacggaccgACCACGGa	|||||||	auugcccuuggaacacaUGGUGCCa	2	9	234	258	[hg19:15:90627240-90627264:-]	0.6695	140	7	-19.91	-1.1992
MIMAT0003261	hsa-miR-593*	121340	SP7	uc001sct.2	NM_152860	cgacUCGU--UACGGAC-CGACCACGGa	:||| ||||: | ||||||||	gcaaGGCACUAUGCUAGAUCUGGUGCCu	2	22	1236	1263	[hg19:12:53720667-53720694:-]	0.6579	159	7	-25.33	-0.1447
MIMAT0003261	hsa-miR-593*	3689	ITGB2	uc002zgf.3	NM_000211	cgacucguuacggacCGACCACGGa	| |||||||	aucagucugauuaaaGGUGGUGCCa	2	11	277	301	[hg19:21:46305982-46306006:-]	0.5118	142	7	-19.22	-0.7832
MIMAT0003261	hsa-miR-593*	285175	UNC80	uc002vdk.2	AB058746	cgACUCGUUACGGACCGACCA-CGGa	||:| ||| :| :|||| |||	ccUGGGAAAU-AUUAAUUGGUAGCCu	2	24	553	577	[hg19:2:210832918-210832942:+]	0.5445	121	0	-20.44	-0.5347
MIMAT0003261	hsa-miR-593*	23051	ZHX3	uc002xjs.1	NM_015035	cgACUC-GUUACGGACC--GACCACGGa	|||| ||| | || |||||||	auUGAGAAAAUUACAGGAAAUGGUGCCu	2	24	1303	1330	[hg19:20:39812501-39812528:-]	0.5502	153	7	-24.73	-0.1045
MIMAT0003261	hsa-miR-593*	54101	RIPK4	uc002yzn.1	NM_020639	cgacUCGUUACGGACCG-ACCACGGa	||||: | || | |||||||	accaAGCAGAG-GUGACAUGGUGCCa	2	22	113	137	[hg19:21:43160861-43160885:-]	0.4569	154	7	-20.37	-0.2376
MIMAT0003261	hsa-miR-593*	58158	NEUROD4	uc001sgp.3	NM_021191	cgACUC--GUUACGGACCGACCACGGa	||:| | || || | |||||||	ccUGGGCCCUAUUCCAG--UGGUGCCa	2	24	252	276	[hg19:12:55421471-55421495:+]	0.6453	151	7	-22.54	-0.4012
MIMAT0003261	hsa-miR-593*	2917	GRM7	uc010hch.1	AK097817	cgACUCGUUACGGACCGACCACGGa	|||||| :|| |||||||	ccUGAGCA---UCU-AAUGGUGCCu	2	24	95	115	[hg19:3:7678052-7678072:+]	0.5436	149	7	-28.51	-0.4944
MIMAT0003261	hsa-miR-593*	3765	KCNJ9	uc001fuy.1	NM_004983	cgacucGU-UACGGACCGA-CCACGGa	|| || ||| :| ||||||	gucauuCACAUCACUGAUUGGGUGCCa	2	20	930	956	[hg19:1:160058537-160058563:+]	0.5202	122	6	-17.23	-0.4395
MIMAT0003261	hsa-miR-593*	154865	IQUB	uc003vko.2	NM_178827	cgacucguuacggacCGACCACGGa	|:||||||:	auucuuuguuaggaaGUUGGUGCUa	2	11	169	193	[hg19:7:123092604-123092628:-]	0.5121	130	0	-15.03	-0.1214
MIMAT0003261	hsa-miR-593*	8622	PDE8B	uc003kfa.2	NM_003719	cgacUCGUUACGGACCGACCACGGa	||||| |||| |||||||	aggaAGCAAAGCCU---UGGUGCCu	2	22	307	328	[hg19:5:76722686-76722707:+]	0.5493	165	7	-26.59	-0.1747
MIMAT0003261	hsa-miR-593*	5373	PMM2	uc002czf.3	NM_000303	cgacucgUUACGGACCGACC-ACGGa	|| | || |||| ||||	ucaccaaAAGGACUUUCUGGUUGCCc	2	19	846	871	[hg19:16:8942528-8942553:+]	0.4856	122	0	-15.17	-0.1047
MIMAT0003261	hsa-miR-593*	79969	C6orf134	uc011eyw.1	BC006105	cgACUCGUUACGGACCG-AC-CACGGa	||:| |: ||||| || |||||	agUGGGAAGCCACUGGCUUGUGUGCCa	2	24	345	371	[hg19:6_cox_hap2:2123188-2123214:+]	0.5451	130	0	-24.96	-0.1566
MIMAT0003261	hsa-miR-593*	6730	SRP68	uc002jqk.1	NM_014230	cgaCUCGUUACGGACCGACCACGGa	|: |: || ||| ||||||||	aggGGCCGCUG-CUGUCUGGUGCCc	2	23	244	267	[hg19:17:74035520-74035543:-]	0.5208	164	7	-26.48	-0.1165
MIMAT0003261	hsa-miR-593*	23779	ARHGAP8	uc003bfl.2	BC010490	cgaCUCGUU--ACGGAC--CGACC-ACGGa	|||||: ||| || |||| ||||	ggaGAGCAGCCUGCGUGUCACUGGCUGCCg	2	23	865	894	[hg19:22:45255615-45255644:+]	0.6219	128	0	-26.32	-0.1057
MIMAT0003261	hsa-miR-593*	23209	MLC1	uc003bjg.1	NM_139202	cgacUCGUUACGGACCGACC-ACGGa	|| |:|| || |||| ||||	gaacAGGAGUGACU--CUGGCUGCCa	2	22	1626	1649	[hg19:22:50498363-50498386:-]	0.4987	126	0	-19.24	-0.2575
MIMAT0003261	hsa-miR-593*	993	CDC25A	uc003csh.1	NM_001789	cgACUCGUUACGGACCGACCACGGa	| | | |||| ||||||||	acUCAUCCCUGCC-CUCUGGUGCCa	2	24	1374	1397	[hg19:3:48199038-48199061:-]	0.6092	153	7	-22.78	-0.1877
MIMAT0003261	hsa-miR-593*	993	CDC25A	uc003csh.1	NM_001789	cgaCUCGUUAC---GGACCG-ACC-ACGGa	||||: || || ||| ||| ||||	ugaGAGCGUUGGACCCAGGCUUGGCUGCCu	2	23	707	736	[hg19:3:48199699-48199728:-]	0.5462	128	0	-27.55	-0.1728
MIMAT0003261	hsa-miR-593*	8521	GCM1	uc010jzr.2	AK309881	cgacucguuACGGAC--CGACCA-CGGa	||| || |||||| |||	gccgcaugcUGCAUGCUGCUGGUAGCCu	2	17	245	272	[hg19:6:52996515-52996542:-]	0.4796	123	0	-24.84	-0.1988
MIMAT0003261	hsa-miR-593*	842	CASP9	uc001awn.2	NM_001229	cgacucguuACGGACCGACCACGGa	| |||| |||||||	uaacgcgucUUCCUGAGUGGUGCCa	2	17	402	426	[hg19:1:15819012-15819036:-]	0.5189	156	7	-22.71	-0.6067
MIMAT0003261	hsa-miR-593*	405	ARNT	uc001evr.1	NM_001668	cgacucguUACGGA---CCGACCACGGa	|||:|| | ||||||||	ccuuccuuAUGUCUCCAGUCUGGUGCCa	2	18	1519	1546	[hg19:1:150782951-150782978:-]	0.7515	156	7	-21.28	-0.4924
MIMAT0003261	hsa-miR-593*	64067	NPAS3	uc001wrs.2	NM_173159	cgacucguuacggaCCGACCACGGa	| ||||||||	aacuuuuaugaggaGACUGGUGCCa	2	12	2680	2704	[hg19:14:34272995-34273019:+]	0.8015	147	7	-19.33	-0.6431
MIMAT0003261	hsa-miR-593*	64067	NPAS3	uc001wrs.2	NM_173159	cgacucguuacggaccgACCACGGa	||||||:	cuuaauuucuaaaaccaUGGUGCUa	2	9	669	693	[hg19:14:34270984-34271008:+]	0.8156	124	0	-11.65	-0.1814
MIMAT0003261	hsa-miR-593*	64067	NPAS3	uc001wrs.2	NM_173159	cgacucguuacggaccgaCCACGGa	||||||	uuaauuuuuucauccgcaGGUGCCa	2	8	3009	3033	[hg19:14:34273324-34273348:+]	0.8397	120	6	-13.44	-0.1278
MIMAT0003261	hsa-miR-593*	23075	SWAP70	uc001mhw.2	NM_015055	cgaCUC-GUUACGG--ACCGACC-ACGGa	||| || |||| | |||| ||||	augGAGUCAUUGCCAUUUCCUGGUUGCCc	2	23	833	861	[hg19:11:9772350-9772378:+]	0.5367	128	0	-22.9	-0.1971
MIMAT0003261	hsa-miR-593*	414235	C10orf108	uc010qab.1	NR_027151	cgACUCGUUACGGACCGACCACGGa	||: | | || |||||||	ucUGGACUUUUGCUAAAUGGUGCCc	2	24	275	299	[hg19:10:697630-697654:+]	0.509	147	7	-22.83	-0.4907
MIMAT0003261	hsa-miR-593*	4286	MITF	uc003dnz.2	NM_198159	cgaCUCGUUACGGACCG-ACCACGGa	|| || : | || |||||||	caaGACGAACAUGUAGCAUGGUGCCu	2	23	1670	1695	[hg19:3:70016069-70016094:+]	0.6911	149	7	-20.73	-0.4541
MIMAT0003261	hsa-miR-593*	9324	HMGN3	uc003pis.2	NM_138730	cgaCUCGUUACGGACCGACCACGGa	||||||| : | ||||||:	cuaGAGCAAUAAUCAG-UGGUGCUu	2	23	346	369	[hg19:6:79911061-79911084:-]	0.7948	144	0	-21.16	-0.1942
MIMAT0003261	hsa-miR-593*	23266	LPHN2	uc001diu.2	NM_012302	cgacucguuacggaccgaCCACGGa	||||||	acuuucuagugaacaaaaGGUGCCu	2	8	1017	1041	[hg19:1:82457846-82457870:+]	0.69	120	6	-18.35	-0.2515
MIMAT0003261	hsa-miR-593*	65012	SLC26A10	uc001spf.2	AK122981	cgacUCGUUACGGACCG---ACCACGGa	|| |:| |||||| |||||||	aaccAGGAGUUCCUGGCACAUGGUGCCu	2	22	1245	1272	[hg19:12:58016712-58016717,58016807-58016828:+]	0.64	168	7	-30.31	-0.231
MIMAT0003261	hsa-miR-593*	375	ARF1	uc001hrs.2	NM_001658	cgacuCGUUACGGACCGACC-ACGGa	|||:| | | |||| ||||	gauuuGCAGUUACGGCCUGGAUGCCa	2	21	476	501	[hg19:1:228286190-228286215:+]	0.5929	128	0	-20.87	-0.2523
MIMAT0003261	hsa-miR-593*	375	ARF1	uc001hrs.2	NM_001658	cgaCUCGUUACGGACCG-AC-CACGGa	| ||:: | |||: || |||||	aacGUGCGGCUCGUGGUGUGAGUGCCa	2	23	56	82	[hg19:1:228285770-228285796:+]	0.6522	121	0	-20.9	-0.3014
MIMAT0003261	hsa-miR-593*	7150	TOP1	uc002xjl.2	NM_003286	cgacuCGUUACGGAC-----CGACCACGga	|||| |:| | :||||||	uguauGCAAAGUCCGAUUAUAUUGGUGCgu	3	21	341	370	[hg19:20:39752278-39752307:+]	0.7316	123	0	-15.29	-0.1446
MIMAT0003261	hsa-miR-593*	3109	HLA-DMB	uc011iaw.1	AK295872	cgacucguuacggaccGACCACGGa	||||||||	uuagauuucaacuauuCUGGUGCCa	2	10	379	403	[hg19:6_mcf_hap5:4241368-4241392:-]	0.5927	145	7	-16.33	-0.8209
MIMAT0003261	hsa-miR-593*	57542	KLHDC5	uc001rij.2	NM_020782	cgacucGUUACG-GACCGACCACGGa	|::| | || |:|||||||	uuagcuCGGUUCUCUUGUUGGUGCCa	2	20	2387	2412	[hg19:12:27953486-27953511:+]	0.5559	158	7	-23.19	-0.2322
MIMAT0003261	hsa-miR-593*	54839	LRRC49	uc002asw.2	NM_017691	cgACUCGUUACG-GACCGACCACGGa	||: : ||| :|| :|||||||	cuUGGUUCUUGCUUUGAUUGGUGCCc	2	24	265	290	[hg19:15:71342216-71342241:+]	0.5354	158	7	-23.41	-0.3242
MIMAT0003261	hsa-miR-593*	9758	FRMPD4	uc004cuz.1	NM_014728	cgacucguuacggaccgaCCACGGa	||||||	cauucacucggaaucaaaGGUGCCa	2	8	92	116	[hg19:X:12738744-12738768:+]	0.7461	120	6	-13.42	-0.1246
MIMAT0003261	hsa-miR-593*	144501	KRT80	uc001rzy.2	NM_001081492	cgACUCGUUACGGACCGACCACGGa	||||||| | |:|||||||	gcUGAGCAA---AU-GUUGGUGCCa	2	24	2450	2470	[hg19:12:52562837-52562857:-]	0.52	157	7	-28.69	-0.2736
MIMAT0003261	hsa-miR-593*	2893	GRIA4	uc009yxl.1	AK311193	cgacuCGUUACGGAC-CGA-CCACGGa	|::| | ||| |:| ||||||	ugccuGUGA-GACUGAGUUAGGUGCCc	2	21	2948	2973	[hg19:11:105852599-105852624:+]	0.6266	121	6	-22.28	-0.3702
MIMAT0003261	hsa-miR-593*	4676	NAP1L4	uc001lxc.2	NM_005969	cgACUCGUUACGGACCGACCACGGa	||| | | ||| |||||||	ucUGAACCA--CCU---UGGUGCCc	2	24	756	775	[hg19:11:2966134-2966153:-]	0.5298	144	7	-19.38	-0.1487
MIMAT0003261	hsa-miR-593*	254065	BRWD3	uc004edt.2	NM_153252	cgacucguuacggaccGACCACGGa	:||||||:	ucugcuuccuuucacaUUGGUGCUu	2	10	94	118	[hg19:X:79931990-79932014:-]	0.7542	125	0	-15.96	-0.1167
MIMAT0003261	hsa-miR-593*	6780	STAU1	uc002xud.2	NM_017453	cgACUCGUUACGGACCGAC-CACGGa	| ||::||| | :|| |||||	uuUCAGUGAUG-CAAAUUGUGUGCCc	2	24	777	801	[hg19:20:47730614-47730638:-]	0.6364	121	0	-18.29	-0.6387
MIMAT0003261	hsa-miR-593*	1191	CLU	uc003xfz.1	NM_001831	cgacucguuacggaccGACCACGGa	:|||||||	uucguuaugaaaacauUUGGUGCCc	2	10	652	676	[hg19:8:27455082-27455106:-]	0.5487	141	7	-15.21	-0.5581
MIMAT0003261	hsa-miR-593*	51194	IPO11	uc011cqr.1	NM_001134779	cgaCUCGU-UACGGACCGACC-ACGGa	||||| ||| | | ||| ||||	---GAGCACAUGACAUG-UGGCUGCCu	2	23	1	23	[hg19:5:61923146-61923168:+]	0.6061	127	0	-20.59	-0.1134
MIMAT0003261	hsa-miR-593*	5782	PTPN12	uc003ugh.2	NM_002835	cgacucguuacggaccgaCCACGGa	||||||	guuauacuggaaaauucaGGUGCCa	2	8	26	50	[hg19:7:77268623-77268647:+]	0.7147	120	6	-16.07	-0.1269
MIMAT0003261	hsa-miR-593*	3109	HLA-DMB	uc011foo.1	AB209577	cgacucguuacggaccGACCACGGa	||||||||	uuagauuucaacuauuCUGGUGCCa	2	10	1825	1849	[hg19:6_cox_hap2:4349041-4349065:-]	0.5927	145	7	-16.33	-0.1764
MIMAT0003261	hsa-miR-593*	10217	CTDSPL	uc003chg.2	NM_001008392	cgACUCGUUACGGACCGACC-ACGGa	|| |||| :||||||| ||||	acUGUGCAA-AAUUGGCUGGCUGCCu	2	24	3301	3325	[hg19:3:38025659-38025683:+]	0.6227	137	0	-34.1	-0.1283
MIMAT0003261	hsa-miR-593*	84969	TOX2	uc010ggo.2	NM_001098797	cgACUCGUUACGGACCG-ACCACGGa	||: |:||:||| | |||||||	ccUGGCGAGUGUCUGUCUUGGUGCCc	2	24	856	881	[hg19:20:42698182-42698207:+]	0.6583	170	7	-32.14	-0.3891
MIMAT0003261	hsa-miR-593*	2047	EPHB1	uc010htz.1	AK309741	cgaCUCGUUACGGACCGACCACGGa	|: ::: | ||| |||||||	cggGGAUGGGGAAUGGAUGGUGCCu	2	23	937	961	[hg19:3:134670812-134670836:+]	0.784	154	7	-24.88	-0.4386
MIMAT0003261	hsa-miR-593*	8045	RASSF7	uc001lqc.2	NM_003475	cgacUCGUU-ACGGACCGAC-CACGGa	||||| || || || |||||	acacAGCAAGAGCAUG--UGUGUGCCa	2	22	305	329	[hg19:11:563950-563974:+]	0.5023	121	0	-15.26	-0.324
MIMAT0003261	hsa-miR-593*	79618	HMBOX1	uc003xhd.3	NM_001135726	cgacuCGUUACGGACCG-ACCACGGa	|::| | |||| |||||||	guucuGUGAAG-AUGGCAUGGUGCCc	2	21	132	156	[hg19:8:28908804-28908828:+]	0.7183	153	7	-24.33	-0.3557
MIMAT0003261	hsa-miR-593*	55244	SLC47A1	uc002gvy.1	NM_018242	cgacucguuacGGACCGACCACGGa	||| ||||||||	gcucccaacacCCUUCCUGGUGCCa	2	15	1308	1332	[hg19:17:19482174-19482198:+]	0.52	154	7	-21.9	-0.4143
MIMAT0003261	hsa-miR-593*	55244	SLC47A1	uc002gvy.1	NM_018242	cgaCUCGUU-A-CGGACCGACC-ACGGa	|| ||| | |:|| ||| ||||	gagGACCAACUGGUCUACAUGGAUGCCc	2	23	1410	1437	[hg19:17:19482276-19482303:+]	0.5195	120	0	-18.35	-0.3768
MIMAT0003261	hsa-miR-593*	347918	EP400NL	uc001ujw.1	AK097720	cgacucGUUACGGACCGAC-CACGGa	||| || | ||| |||||	acagcaCAAAGCAU--CUGUGUGCCg	2	20	157	180	[hg19:12:132599829-132599852:+]	0.5528	120	0	-16.3	-0.7151
MIMAT0003261	hsa-miR-593*	9913	SUPT7L	uc002rli.1	NM_014860	cgACUCGUUACGG-ACCG--ACC-ACGGa	|| : ||||| |||: ||| ||||	guUGCUUCAUGCCUUGGUGAUGGAUGCCa	2	24	1034	1062	[hg19:2:27875290-27875318:-]	0.5729	125	0	-23.61	-0.2235
MIMAT0003261	hsa-miR-593*	1654	DDX3X	uc004dfe.2	NM_001356	cgACU-CGUUACGGACCG-ACCACGGa	||| |: || :|| : ||||||:	auUGAGGUCAU--UUGUUAUGGUGCUa	2	24	1484	1508	[hg19:X:41208456-41208480:+]	0.8175	130	0	-18.07	-0.2004
MIMAT0003261	hsa-miR-593*	10318	TNIP1	uc010jhr.1	AB252973	cgacUCG--UUACGGACCGACCACGGa	||| :| ||||| |||||||	ccauAGCUGGAGGCCUG--UGGUGCCa	2	22	590	614	[hg19:5:150409589-150409613:-]	0.5804	157	7	-27.78	-0.1303
MIMAT0003261	hsa-miR-593*	23633	KPNA6	uc001bug.2	NM_012316	cgacucguuACGGACCGACCACGGa	| ::|| |||||||	uccaauacuUUUUUGAAUGGUGCCa	2	17	3048	3072	[hg19:1:32639543-32639567:+]	0.5485	148	7	-16.76	-0.1026
MIMAT0003261	hsa-miR-593*	63894	VIPAR	uc001xtt.1	NM_022067	cgacUCGUUACGGACCGACCACGGa	:|:| | |:| :|||||||	uaaaGGUAUUUCUUCCUUGGUGCCu	2	22	915	939	[hg19:14:77893020-77893044:-]	0.6165	157	7	-19.71	-0.6823
MIMAT0003261	hsa-miR-593*	80344	DCAF11	uc001wlv.2	NM_001163484	cgaCUC-GUUACGGACCGACCACGGa	||| ||| || ||||||||	uagGAGAAAAUACCCUUCUGGUGCCc	2	23	830	855	[hg19:14:24593348-24593373:+]	0.5968	161	7	-22.81	-0.1586
MIMAT0003261	hsa-miR-593*	7298	TYMS	uc010dka.1	NM_001071	cgacucguuaCGGACCGACC-ACGGa	|:: |||||| ||||	gucuuuagggGUUGGGCUGGAUGCCg	2	16	34	59	[hg19:18:673031-673056:+]	0.4793	123	0	-21.12	-0.2486
MIMAT0003261	hsa-miR-593*	22999	RIMS1	uc003pgb.3	AB002338	cgacuCGUUACGGACCGAC--CACGGa	|| |||::|| :|| |||||	cuacuGCCAUGUUUGCUUGGAGUGCCa	2	21	1038	1064	[hg19:6:72971512-72971538:+]	0.536	120	0	-23.51	-0.1573
MIMAT0003261	hsa-miR-593*	23033	DOPEY1	uc003pjs.1	NM_015018	cgACUCGUUACGGACCG--ACCACGGa	||: : || ||| : |||||||	guUGGCUCAU-ACUGAUUAUGGUGCCu	2	24	184	209	[hg19:6:83878070-83878095:+]	0.6314	144	7	-24.22	-1.1733
MIMAT0003261	hsa-miR-593*	753	C18orf1	uc002ksa.2	NM_181481	cgacucgUUACGGAC-CGAC-CACGGa	||| |||| |:|| |||||	gaaucaaAAUUCCUGUGUUGUGUGCCa	2	19	484	510	[hg19:18:13646140-13646166:+]	0.6703	133	0	-21.31	-0.1029
MIMAT0003261	hsa-miR-593*	135138	PACRG	uc003qua.2	NM_152410	cgACUCGUUACGGACCG---AC-CACGGa	| |||||| ||| : || |||||	auUCAGCAAUUGCUGUUCUGUGUGUGCCu	2	24	324	352	[hg19:6:163736343-163736371:+]	0.7969	126	0	-22.09	-0.6107
MIMAT0003261	hsa-miR-593*	3181	HNRNPA2B1	uc003sxr.3	NM_031243	cgacUCGUUACGGACCGACCACGGa	||:|:| :|| |:|||||||	ugaaAGUAGU-UCUUGUUGGUGCCu	2	22	1979	2002	[hg19:7:26229978-26230001:-]	0.6598	167	7	-26.51	-0.9402
MIMAT0003261	hsa-miR-593*	10318	TNIP1	uc003ltf.2	NM_006058	cgacUCG--UUACGGACCGACCACGGa	||| :| ||||| |||||||	ccauAGCUGGAGGCCUG--UGGUGCCa	2	22	661	685	[hg19:5:150409589-150409613:-]	0.5804	157	7	-27.78	-0.1686
MIMAT0003261	hsa-miR-593*	79969	C6orf134	uc011jgp.1	BC006105	cgACUCGUUACGGACCG-AC-CACGGa	||:| |: ||||| || |||||	agUGGGAAGCCACUGGCUUGUGUGCCa	2	24	345	371	[hg19:6_ssto_hap7:1943417-1943443:+]	0.5451	130	0	-24.96	-0.1566
MIMAT0003261	hsa-miR-593*	55208	DCUN1D2	uc001vtr.1	NM_001014283	cgacucguuacggaccGACCACGGa	:|||||||	cuaauguuuuuuaaaaUUGGUGCCa	2	10	487	511	[hg19:13:114111833-114111857:-]	0.5307	141	7	-17.47	-1.0627
MIMAT0003261	hsa-miR-593*	387590	psiTPTE22	uc010gqq.2	EU541208	cgACUCGUUACGGACCGACCACGGa	|| || ||| :|||||||	gaUGCGC-AUG-AAAUUUGGUGCCg	2	24	383	405	[hg19:22:17092625-17092647:+]	0.5	143	7	-19.46	-0.4523
MIMAT0003261	hsa-miR-593*	100101467	ZNF397OS	uc002kym.2	NM_001112734	cgacUCGUUACGGA--CC-GACCACGGa	| :|:| ||| || |||||||	guaaAAUAGUACCUGAGGAAUGGUGCCu	2	22	508	535	[hg19:18:32832879-32832906:-]	0.539	151	7	-24.2	-0.313
MIMAT0003261	hsa-miR-593*	6626	SNRPA	uc002ooz.2	NM_004596	cgaCUCGUUACGGAC-CG---ACCA-CGGa	|||| :||: || |: |||| |||	uugGAGCCGUGUGUGAGUGAGUGGUCGCCa	2	23	100	129	[hg19:19:41271172-41271201:+]	0.7043	120	0	-21.28	-0.6757
MIMAT0003261	hsa-miR-593*	54103	PION	uc003ugf.2	NM_017439	cgacuCGUUA--C-GGACCGACCACGGa	||||| | :|| |||| ||||	aaaacGCAAUUGGAUCU-GCUGCUGCCa	2	21	6	32	[hg19:7:76940643-76940669:-]	0.5796	128	0	-17.3	-0.1196
MIMAT0003261	hsa-miR-593*	7391	USF1	uc001fxi.2	NM_007122	cgACUCGUUACGGACCGACCACGGa	| ||||: |||||||||||	guUUAGCAG----UGGCUGGUGCCc	2	24	472	492	[hg19:1:161009218-161009238:-]	0.5714	162	7	-29.25	-0.142
MIMAT0003261	hsa-miR-593*	7693	ZNF134	uc002qpn.2	NM_003435	cgacUCGUUACGGACCGACCACGGa	:| :|| ||| |||||||	caaaGGAGAUACCU-UAUGGUGCCa	2	22	66	89	[hg19:19:58132837-58132860:+]	0.504	151	7	-20.65	-0.6266
MIMAT0003261	hsa-miR-593*	85364	ZCCHC3	uc002wdf.2	NM_033089	cgacUCGU-UACGGACCGACCACGGa	| || || ||| ||||||||	gaaaAUCACAUAGCUGUCUGGUGCCa	2	22	797	822	[hg19:20:280239-280264:+]	0.7186	164	7	-21.03	-0.5955
MIMAT0003261	hsa-miR-593*	23529	CLCF1	uc001okq.2	NM_013246	cgaCUCGUUACGGACCGACC-ACGGa	|:|::| ||| :||| ||||	cugGGGUGAAGCC-CUUUGGCUGCCc	2	23	387	411	[hg19:11:67132196-67132220:-]	0.5736	120	0	-20.19	-0.2446
MIMAT0003261	hsa-miR-593*	51750	RTEL1	uc002yft.1	NM_032957	cgacucguuaCGGAC-C-GACCACGGa	||||| | |||||||	cuggcuccugGCCUGUGAGUGGUGCCa	2	16	251	277	[hg19:20:62327462-62327488:+]	0.5266	149	7	-27.94	-0.1354
MIMAT0003261	hsa-miR-593*	167826	OLIG3	uc003qhp.1	NM_175747	cgacuCGUUACGGACCG--ACCACGGa	|: :|| | ||| |||||||	aauauGUCGUG-CAGGCUGUGGUGCCg	2	21	661	686	[hg19:6:137813803-137813828:-]	0.7203	149	7	-21.13	-0.5353
MIMAT0003261	hsa-miR-593*	942	CD86	uc003eet.2	NM_175862	cgacUCGUUACGGACCGACCACGGa	|| ||| |: |||||||||	gcccAG-AAUUCUAAGCUGGUGCCc	2	22	378	401	[hg19:3:121838759-121838782:+]	0.5961	163	7	-21.46	-0.2642
MIMAT0003261	hsa-miR-593*	4978	OPCML	uc001qgs.2	NM_002545	cgacucguUAC-GGACCG--ACCACGGa	||| |:| | |||||||	aaaaaauuAUGACUUAUCAAUGGUGCCg	2	18	4857	4884	[hg19:11:132285203-132285230:-]	0.7437	143	7	-14.85	-0.4242
MIMAT0003261	hsa-miR-593*	26031	OSBPL3	uc003sxk.1	AF515640	cgacucguuACGGACCG---ACCACGGa	| | |||| |||||||	gggugcuucUCCGUGGCACUUGGUGCCu	2	17	20	47	[hg19:7:24873875-24873902:-]	0.5173	147	7	-24.77	-0.1955
MIMAT0003261	hsa-miR-593*	57343	ZNF304	uc010ygw.1	NM_020657	cgACUCGUU-ACGGACC-GACC-ACGGa	|| :|| | : ||| |||| ||||	ugUGCCUAACUUUGUGGCCUGGCUGCCa	2	24	862	889	[hg19:19:57870079-57870106:+]	0.5509	121	0	-21.24	-0.1271
MIMAT0003261	hsa-miR-593*	3805	KIR2DL4	uc002quh.3	AF002256	cgacucguuacggaccGACCACGGa	||||||||	uccucacaccacaaauCUGGUGCCu	2	10	33	57	[hg19:19_gl000209_random:67750-67774:+]	0.5057	145	7	-18.67	-0.3158
MIMAT0003261	hsa-miR-593*	284613	CYB561D1	uc010ovo.1	NM_001134400	cgACUCGUUACGGACCGAC-CACGGa	||: || | |:|| :|| |||||	ggUGGUCAUUUCUUGCUUGUGUGCCu	2	24	274	299	[hg19:1:110039155-110039180:+]	0.577	135	0	-21.54	-0.1307
MIMAT0003261	hsa-miR-593*	2664	GDI1	uc011mzo.1	AK294893	cgaCUCGUUACGGACCGACCACGGa	|:||:| | || ||||||||	cagGGGCGAGGACU-UCUGGUGCCu	2	23	1450	1473	[hg19:X:153669940-153669963:+]	0.5331	164	7	-28.25	-0.1061
MIMAT0003261	hsa-miR-593*	26130	GAPVD1	uc004bpp.2	NM_015635	cgACUCGUUACGGACCGACCACGGa	| || |||| | :|||||||	aaUCAGGAAUGGGU-UUUGGUGCCu	2	24	1185	1208	[hg19:9:128126210-128126233:+]	0.611	157	7	-21.88	-0.4055
MIMAT0003261	hsa-miR-593*	11009	IL24	uc001hes.1	NM_006850	cgacucguUACGGACCG---ACCACGGa	|| ||| | |||||||	accccaucAUCCCUUUCCCUUGGUGCCc	2	18	638	665	[hg19:1:207077042-207077069:+]	0.5143	144	7	-16.92	-0.4619
MIMAT0003261	hsa-miR-593*	64778	FNDC3B	uc003fhy.2	NM_022763	cgaCUCGUUAC--GGACCGAC-CACGGa	|| ||||| :: ||| |||||	ugaGAUCAAUGAAUUAUUCUGUGUGCCu	2	23	1996	2023	[hg19:3:172117261-172117288:+]	0.7082	121	0	-22.38	-0.9662
MIMAT0003261	hsa-miR-593*	284632	LOC284632	uc010oei.1	NR_027087	cgacucgUUA-CG-GACCGAC-CACGGa	:|| || ||| ||| |||||	aauacuaGAUAGCACUGCCUGUGUGCCa	2	19	1442	1469	[hg19:1:24537776-24537803:+]	0.5355	124	0	-22.59	-0.1113
MIMAT0003261	hsa-miR-593*	55255	WDR41	uc003kff.1	NM_018268	cgacucguuacGGACCGACCACGGa	||| :||||||:	auauguuuucuCCU-UUUGGUGCUa	2	15	845	868	[hg19:5:76728092-76728115:-]	0.5156	128	0	-14.33	-0.1561
MIMAT0003261	hsa-miR-593*	2630	GBAP1	uc001fjd.2	BC092482	cgacucguuacGGACCGACCACGGa	:|| | |||||||	ucacuuuccccUCUAGGUGGUGCCa	2	15	148	172	[hg19:1:155183987-155184011:-]	0.6028	150	7	-17.39	-0.1865
MIMAT0003261	hsa-miR-593*	3321	IGSF3	uc001egq.1	NM_001542	cgACUCGUUACGGACCG--ACCACGGa	|| :||| |||: |||||||	gaUGUCAGAUGGAUGGUAAUGGUGCCc	2	24	2486	2512	[hg19:1:117117422-117117448:-]	0.6317	154	7	-22.95	-0.216
MIMAT0003261	hsa-miR-593*	3321	IGSF3	uc001egq.1	NM_001542	cgacucguUACGGACCGACCACGGa	| | | | |||||||	accccauuAGGAGUAGAUGGUGCCc	2	18	683	707	[hg19:1:117119227-117119251:-]	0.7141	145	7	-18.29	-0.1374
MIMAT0003261	hsa-miR-593*	2737	GLI3	uc011kbh.1	NM_000168	cgACUCGUUACGGACCGACC-ACGGa	|| :|:| ||| ||| ||||	gaUGUUUAGUAGCUGUGUGGAUGCCu	2	24	1199	1224	[hg19:7:42002704-42002729:-]	0.5885	123	0	-20.14	-0.3236
MIMAT0003261	hsa-miR-593*	138639	PTPDC1	uc004auh.1	NM_152422	cgACUCGUU-ACGG-A--CCGACCACGGa	||| || |||| | :|||||||	uuUGAAAAAUUGCCAUAAAUUUGGUGCCa	2	24	194	222	[hg19:9:96870420-96870448:+]	0.6389	148	7	-21.53	-1.2328
MIMAT0003261	hsa-miR-593*	582	BBS1	uc001oil.1	BC109065	cgacUCGU-UACGGACCGAC-CACGGa	||:: | ||| |||| |||||	ccaaAGUGCACCCCU-GCUGAGUGCCc	2	22	196	221	[hg19:11:66299442-66299467:+]	0.7088	122	0	-22.7	-0.1212
MIMAT0003261	hsa-miR-593*	6642	SNX1	uc002amv.2	NM_003099	cgacuCGUUACGGACCGACCACGGa	|: | ||| | |||||||	uuucuGUUACUCCU-GAUGGUGCCa	2	21	329	352	[hg19:15:64430146-64430169:+]	0.7541	150	7	-22.23	-0.2578
MIMAT0003261	hsa-miR-593*	79864	C11orf63	uc001pym.2	NM_024806	cgACUC---GUU-ACGGACCGACCACGGa	|||| ||| || | |||||||	uaUGAGGCCCAAUUGGAU-UAUGGUGCCa	2	24	146	173	[hg19:11:122830299-122830326:+]	0.5385	143	7	-23.95	-1.2348
MIMAT0003261	hsa-miR-593*	7127	TNFAIP2	uc001yml.1	BC017818	cgacucguuacggaccGACCACGGa	||||||||	ggccuccucugaggacCUGGUGCCa	2	10	199	223	[hg19:14:103592803-103592827:+]	0.681	145	7	-22.28	-0.2078
MIMAT0003261	hsa-miR-593*	5173	PDYN	uc002wfv.2	NM_024411	cgACUCGUUACGGACCGACC-ACGGa	|||||| ||: :||| ||||	cuUGAGCA--GCUGAAUUGGCUGCCa	2	24	979	1002	[hg19:20:1959967-1959990:-]	0.7693	124	0	-23.49	-0.8847
MIMAT0003261	hsa-miR-593*	1718	DHCR24	uc001cyc.1	NM_014762	cgacucguuACGG-ACCGACCACGGa	|||| | :|||||||	aguucucccUGCCAUCCUUGGUGCCg	2	17	628	653	[hg19:1:55317253-55317278:-]	0.6142	151	7	-19.98	-0.1078
MIMAT0003261	hsa-miR-593*	2696	GIPR	uc010xxq.1	BC143302	cgACUCGUUACGGACCGAC-CACGGa	| |||| | :| :|| |||||	agUUAGCAUGGAUUUAUUGAGUGCCa	2	24	1394	1419	[hg19:19:46185218-46185243:+]	0.53	123	0	-17.27	-0.3508
MIMAT0003261	hsa-miR-593*	10197	PSME3	uc002ibr.2	NM_005789	cgaCUCGUUACGGACCGACC-ACGGa	|||| || || |||| ||||	caaGAGC-UUGACU-CCUGGUUGCCu	2	23	911	934	[hg19:17:40994506-40994529:+]	0.5519	122	0	-21.97	-0.2258
MIMAT0003261	hsa-miR-593*	55110	MAGOHB	uc001qyq.1	NM_018048	cgACUCGUUACGGACCGACCACGGa	| | :::|| | :|||||||	cuUAACUGGUG--UAAUUGGUGCCa	2	24	1280	1302	[hg19:12:10757572-10757594:-]	0.5214	144	7	-19.29	-0.8328
MIMAT0003261	hsa-miR-593*	127731	VWA5B1	uc009vps.2	NM_001039500	cgaCUCGUUA-CGGACCGACCACGGa	||| | | || | ||||||||	auaGAG-ACUAGCAAGUCUGGUGCCu	2	23	484	508	[hg19:1:20681240-20681264:+]	0.5263	155	7	-25.31	-0.13
MIMAT0003261	hsa-miR-593*	51308	REEP2	uc003lcz.2	NM_016606	cgACUCGUUACGGA--CCGAC-CACGGa	||: || || | ||||| |||||	ccUGGUCAUUGGGUGGGGCUGAGUGCCa	2	24	578	605	[hg19:5:137782018-137782045:+]	0.5316	130	0	-27.2	-0.1535
MIMAT0003261	hsa-miR-593*	89	ACTN3	uc010rpi.1	AK303044	cgacUCGUUACGGACCGACCACGGa	|| |||:| |||||||	aggaAGGCUUGCUUCUGUGGUGCCa	2	22	727	751	[hg19:11:66322019-66322043:+]	0.786	153	7	-20.11	-0.3053
MIMAT0003261	hsa-miR-593*	89	ACTN3	uc010rpi.1	AK303044	cgaCUCGUUACG--GACCG---ACCACGGa	|||:| ||| | | | |||||||	gccGAGUACUGCAUCCGCCGUAUGGUGCCc	2	23	2841	2870	[hg19:11:66330554-66330583:+]	0.7335	152	7	-22.8	-0.1276
MIMAT0003261	hsa-miR-593*	89	ACTN3	uc010rpi.1	AK303044	cgACUCGUUACGGACCG-AC-CACGGa	||:|::| ||| || || |||||	ugUGGGUGA-GCCCAGCAUGAGUGCCa	2	24	1187	1212	[hg19:11:66325214-66325239:+]	0.8041	128	0	-22.2	-0.2733
MIMAT0003261	hsa-miR-593*	23318	ZCCHC11	uc001cty.2	NM_001009881	cgacucGUUACGGACCGACCACGGa	||: ||| | | |||||	ucuuuaCAGAACCUUG-UAGUGCCa	2	20	466	489	[hg19:1:52889118-52889141:-]	0.7435	121	0	-13.77	-0.1172
MIMAT0003261	hsa-miR-593*	23224	SYNE2	uc001xgp.2	AY927627	cgacUCGUUACGGACC--GACCACGGa	||:||| | ||| :|||||||	uagcAGUAAU-CAUGGACUUGGUGCCa	2	22	299	324	[hg19:14:64629350-64629375:+]	0.5432	162	7	-24.05	-0.7621
MIMAT0003261	hsa-miR-593*	7626	ZNF75D	uc004eyp.2	NM_007131	cgaCUCGUUACGGACCGACCACGGa	||| : | :| ||||||||	augGAG-GCUUUCAAACUGGUGCCa	2	23	826	849	[hg19:X:134420220-134420243:-]	0.5362	148	7	-19.37	-0.3858
MIMAT0003261	hsa-miR-593*	8662	EIF3B	uc003smb.2	AK093807	cgacUCGUUACGGACCGAC-CACGGa	|| |:| : | |||| |||||	aacaAGGAGUUUAU-GCUGAGUGCCa	2	22	445	469	[hg19:7:2416054-2416078:+]	0.509	123	0	-17.55	-0.1226
MIMAT0003261	hsa-miR-593*	342850	ANKRD62	uc002kqs.2	BX649021	cgAC-UCGUUACGGACCGACCACGGa	|| :|::| ||| | |||||||	guUGCGGUGA-GCCAAGAUGGUGCCa	2	24	1064	1088	[hg19:18:12129002-12129026:+]	0.521	156	7	-22.01	-0.111
MIMAT0003261	hsa-miR-593*	79027	ZNF655	uc003uri.2	NM_001009958	cgacucGUU--ACGGACCG-ACCACGGa	||| |||| |: |||||||	cgaacaCAACCUGCCCCGUAUGGUGCCu	2	20	288	315	[hg19:7:99161970-99161997:+]	0.5912	153	7	-22.96	-0.4601
MIMAT0003261	hsa-miR-593*	79027	ZNF655	uc003uri.2	NM_001009958	cgACUCGUUACGGACCGAC-CACGGa	|| | || : | |||| |||||	aaUGUGAAACUUAU-GCUGUGUGCCc	2	24	249	273	[hg19:7:99161931-99161955:+]	0.6096	121	0	-16.87	-0.874
MIMAT0003261	hsa-miR-593*	25988	HINFP	uc001pvq.2	NM_198971	cgacucgUUACGGA---CC-GACCACGGa	:|||||| || |||||||	gccaaugGAUGCCUUUAGGAGUGGUGCCg	2	19	83	111	[hg19:11:119005291-119005319:+]	0.6173	152	7	-24.43	-0.2132
MIMAT0003261	hsa-miR-593*	55890	GPRC5C	uc002jkr.2	NM_018653	cgacucguuacggaccgaCCACGGa	||||||	uccucugugaggaacaagGGUGCCu	2	8	352	376	[hg19:17:72443519-72443543:+]	0.6147	120	6	-18.96	-0.1113
MIMAT0003261	hsa-miR-593*	346689	KLRG2	uc010lnc.2	BC110858	cgacucGUUA-CGGA--CC-GAC-CACGGa	| || |||| || ||| |||||	gauuuuCUAUGGCCUCAGGCCUGAGUGCCa	2	20	122	151	[hg19:7:139138115-139138144:-]	0.5518	120	0	-20.38	-0.5385
MIMAT0003261	hsa-miR-593*	137872	ADHFE1	uc003xwf.3	BC110290	cgACUCGUUACGGACCGACCACGGa	|| | :|| | ||||||||	aaUGUG-GAUCACCCACUGGUGCCc	2	24	1193	1216	[hg19:8:67369110-67369130,67369305-67369307:+]	0.7483	149	7	-19.4	-0.1064
MIMAT0003261	hsa-miR-593*	137872	ADHFE1	uc003xwf.3	BC110290	cgacucGU-UACGGACCG----ACCA-CGGa	|| ||||||| | |||| |||	acccucCACAUGCCUGCCCGAGUGGUCGCCa	2	20	481	511	[hg19:8:67361153-67361183:+]	0.8038	121	0	-19.48	-0.5643
MIMAT0003261	hsa-miR-593*	10272	FSTL3	uc002lpk.1	NM_005860	cgAC-UCGU-UACGGACC--GACCACGGa	|| || | | |||||| ||||||||	ccUGCAGGACAGGCCUGGGCCUGGUGCCc	2	24	2	30	[hg19:19:681710-681738:+]	0.5465	168	7	-33.31	-0.1312
MIMAT0003261	hsa-miR-593*	10272	FSTL3	uc002lpk.1	NM_005860	cgacucGUUACGGACCGAC-CACGGa	|| ||||| ||| |||||	cuucccCACUGCCU--CUGUGUGCCc	2	20	835	858	[hg19:19:682543-682566:+]	0.5221	128	0	-20.79	-0.1592
MIMAT0003261	hsa-miR-593*	100289314	LOC100289314	uc010tsk.1	AK315905	cgACUCGUUACGGA--C-CG-ACCACGGa	||| |:| ::| | || |||||||	cuUGAAAAGUCUUUCAGUGCGUGGUGCCa	2	24	359	387	[hg19:14:65410126-65410154:+]	0.5358	148	7	-19.68	-0.158
MIMAT0003261	hsa-miR-593*	23213	SULF1	uc003xyd.2	NM_001128204	cgacucgUUACGGA-CCGACCACGGa	:||| || | |||||||	caaucaaGAUGGCUAGAAUGGUGCCu	2	19	1101	1126	[hg19:8:70571871-70571896:+]	0.5759	153	7	-21.54	-0.3926
MIMAT0003261	hsa-miR-593*	51365	PLA1A	uc003ecw.2	AF035269	cgaCUCGUUACGGACCGACC-ACGGa	|: ||| || |||| ||||	ggaGGCCAAGACCAACCUGGCUGCCc	2	23	751	776	[hg19:3:119334906-119334931:+]	0.7592	122	0	-21.02	-0.4745
MIMAT0003261	hsa-miR-593*	387647	LOC387647	uc001iuo.1	CR600156	cgACUCGUUACGGAC--CGACCACGGa	|||| || | | |||||||	uaUGAGGAAAGAAAGAAAAUGGUGCCc	2	24	243	269	[hg19:10:29756268-29756294:+]	0.503	146	7	-19.14	-0.3452
MIMAT0003261	hsa-miR-593*	57658	CALCOCO1	uc001sef.2	NM_020898	cgACUCGUUACGGACCGAC-CACGGa	| || | |||:| ||| |||||	ccUAAGAACUGCUU--CUGUGUGCCc	2	24	118	141	[hg19:12:54105587-54105610:-]	0.611	128	0	-19.38	-0.8717
MIMAT0003261	hsa-miR-593*	84072	HORMAD1	uc001evk.1	NM_032132	cgACUCGUUACGGAC-CGACCACGGa	|| |||| : | :||||||:	aaUGUACAAUUUAAGAAUUGGUGCUu	2	24	476	501	[hg19:1:150670629-150670654:-]	0.6248	134	0	-15.78	-0.2101
MIMAT0003261	hsa-miR-593*	9363	RAB33A	uc010nre.2	AK094927	cgacucguuacGGAC-CGACCACGGa	::|| |:|||||||	ucucccuggcuUUUGUGUUGGUGCCu	2	15	6	31	[hg19:X:129305778-129305803:+]	0.5684	149	7	-27.09	-0.1205
MIMAT0003261	hsa-miR-593*	146712	B3GNTL1	uc002kgg.1	NM_001009905	cgacUCGUUACGGACCGAC-CACGGa	| ||: |:|| | || |||||	cgcaACCAGAGUCUCG-UGUGUGCCg	2	22	97	121	[hg19:17:80901829-80901853:-]	0.52	123	0	-16.36	-0.3578
MIMAT0003261	hsa-miR-593*	54566	EPB41L4B	uc004bdz.1	NM_019114	cgacucguuacggACCG-ACCACGGa	|||| |||||||	gucaccuggaagaUGGCAUGGUGCCu	2	13	13	38	[hg19:9:111936796-111936821:-]	0.7232	151	7	-25.45	-0.2
MIMAT0003261	hsa-miR-593*	54566	EPB41L4B	uc004bdz.1	NM_019114	cgacucguuacgGACCGACCACGGa	||| |||||||	cucuccuuaaaaCUGAAUGGUGCCa	2	14	1651	1675	[hg19:9:111935159-111935183:-]	0.7191	149	7	-18.24	-1.1414
MIMAT0003261	hsa-miR-593*	64429	ZDHHC6	uc001kzv.2	NM_022494	cgacucguuacggaccgaCCACGGa	||||||	gauguucuuuuccucaaaGGUGCCc	2	8	96	120	[hg19:10:114190442-114190466:-]	0.735	120	6	-14.85	-0.1783
MIMAT0003261	hsa-miR-593*	112	ADCY6	uc001rsh.3	NM_015270	cgACUCGUUACGGACCGACCACGGa	| :| |: | || :|||||||	gaUAGGAAGAGACUACUUGGUGCCa	2	24	2060	2084	[hg19:12:49160290-49160314:-]	0.5769	155	7	-18.4	-0.6308
MIMAT0003261	hsa-miR-593*	112	ADCY6	uc001rsh.3	NM_015270	cgACUCGUUACGGAC-----CGACCACGGa	||| : ||||| |:|||||||	cuUGACUCUGGCCUGAAUUUGUUGGUGCCu	2	24	1682	1711	[hg19:12:49160663-49160692:-]	0.6289	150	7	-28.52	-0.2915
MIMAT0003261	hsa-miR-593*	11240	PADI2	uc001baf.2	NM_007365	cgacucguuacggaccGACCACGGa	||||||||	uucuuccuuuuuauucCUGGUGCCa	2	10	860	884	[hg19:1:17394655-17394679:-]	0.521	145	7	-16.16	-0.2057
MIMAT0003261	hsa-miR-593*	63929	XPNPEP3	uc003azf.1	BC011632	cgacucguuacggaccgaCCACGGa	||||||	uuucuggauuuuuaucagGGUGCCa	2	8	538	562	[hg19:22:41257887-41257911:+]	0.7301	120	6	-16.84	-0.2979
MIMAT0003261	hsa-miR-593*	114793	FMNL2	uc002tye.2	NM_052905	cgacucguuacggaccGACCACGGa	:|||||||	auucugagaacagaaaUUGGUGCCu	2	10	769	793	[hg19:2:153505188-153505212:+]	0.5979	141	7	-23.76	-0.6636
MIMAT0003261	hsa-miR-593*	3595	IL12RB2	uc001ddu.2	NM_001559	cgacUCGUU-ACGG-ACCGA-CCACGGa	||||: ||:| | || ||||||	cuccAGCAGCUGUCAUCUCUGGGUGCCa	2	22	74	101	[hg19:1:67861846-67861873:+]	0.5289	127	6	-20.97	-0.3203
MIMAT0003261	hsa-miR-593*	3925	STMN1	uc001blb.2	AK054594	cgacucgUUACG-GACCGACC-ACGGa	| ||| :|| :||| ||||	cacaaugACUGCUUUGUUUGGAUGCCu	2	19	620	646	[hg19:1:26226861-26226887:-]	0.5727	121	0	-20.75	-0.3266
MIMAT0003261	hsa-miR-593*	1823	DSC1	uc002kwm.2	NM_004948	cgacucGUUACGGACCGACCACGGa	:|: | | |:|||||||	uguucuUAGAACAUAGUUGGUGCCa	2	20	619	643	[hg19:18:28710042-28710066:-]	0.5404	151	7	-18.17	-0.8261
MIMAT0003261	hsa-miR-593*	6895	TARBP2	uc001sdv.2	CR593716	cgacucGUUACGGACCGACC-ACGGa	|::||||| |||| ||||	ugcacaCGGUGCCU--CUGGAUGCCc	2	20	823	846	[hg19:12:53898979-53899002:+]	0.7179	128	0	-25.68	-0.1127
MIMAT0003261	hsa-miR-593*	10683	DLL3	uc002olw.2	NM_203486	cgacuCGUUACGGACCGACCACGGa	|:| | || | |||||||	uuuuuGUAUUUGCUCGGUGGUGCCc	2	21	39	63	[hg19:19:39998936-39998960:+]	0.5747	156	7	-22.94	-0.2777
MIMAT0003261	hsa-miR-593*	80179	MYO19	uc010wcy.1	NM_001163735	cgacucguuacggaccGACCACGGa	:|||||||	-------------uccUUGGUGCCu	2	10	1	12	[hg19:17:34852083-34852094:-]	0.6926	141	7	-17.54	-1.0589
MIMAT0003261	hsa-miR-593*	92305	TMEM129	uc003gdm.2	NM_138385	cgacucguUACGGACCG--ACCACGGa	|| |||| | |||||||	gguuucucAU-CCUGUCCUUGGUGCCu	2	18	851	876	[hg19:4:1718261-1718286:-]	0.5082	150	7	-22.96	-0.2567
MIMAT0003261	hsa-miR-593*	92305	TMEM129	uc003gdm.2	NM_138385	cgacUCGUUACG--GAC--CG------ACCACGGa	||||:||: ||| || |||||||	ugccAGCAGUGUUACUGCCGCCCCAUGUGGUGCCu	2	22	66	100	[hg19:4:1719037-1719071:-]	0.7818	142	7	-26.12	-0.2225
MIMAT0003261	hsa-miR-593*	55328	RNLS	uc001kfe.2	NM_001031709	cgacucGUUACGGACCGAC-CACGGa	|||| | | :|| |||||	aaaucaCAAUAACAGUUUGUGUGCCa	2	20	302	327	[hg19:10:90044784-90044809:-]	0.5826	123	0	-14.14	-1.2483
MIMAT0003261	hsa-miR-593*	79969	C6orf134	uc011jgr.1	CR615059	cgACUCGUUA--CGGACC-GACCA-CGGa	||:| | | || || ||||| |||	aaUGGGGACUCCCCCAGGUCUGGUAGCCc	2	24	772	800	[hg19:6_ssto_hap7:1942302-1942304,1945952-1945977:+]	0.698	121	0	-22.84	-0.2042
MIMAT0003261	hsa-miR-593*	728723	LOC728723	uc010izz.2	AK311179	cgACUCGUUACGGACCGACCACGGa	|||| :| | | |||||||	ggUGAG-GAGGGAAAGAUGGUGCCc	2	24	528	551	[hg19:5:76414281-76414304:+]	0.5427	149	7	-21.3	-0.122
MIMAT0003261	hsa-miR-593*	78989	COLEC11	uc002qya.2	NM_024027	cgaCUCGUUACGGACC--G-ACCACGGa	|: ||: ||| | | |||||||	cagGGACAGAGCCCAGACCAUGGUGCCa	2	23	53	80	[hg19:2:3691761-3691788:+]	0.3926	148	7	-23.44	-0.1192
MIMAT0003261	hsa-miR-593*	3805	KIR2DL4	uc002qhg.2	NM_001080770	cgacucguuacggaccGACCACGGa	||||||||	uccucacaccacaaauCUGGUGCCu	2	10	33	57	[hg19:19:55325599-55325623:+]	0.5105	145	7	-18.67	-0.323
MIMAT0003261	hsa-miR-593*	56834	GPR137	uc001nzi.2	BC033920	cgaCUCGUUACGGACCGACC-ACGGa	|:||| ||| |||| ||||	gggGGGCAUGGCC---CUGGCUGCCa	2	23	173	195	[hg19:11:64056841-64056863:+]	0.6955	122	0	-23.89	-0.4051
MIMAT0003261	hsa-miR-593*	5046	PCSK6	uc002bxg.1	NM_138322	cgacucgUUACGGACCGAC-CACGGa	|||| :|| :|| |||||	uaaaauaAAUG-UUGUUUGUGUGCC-	2	19	501	524	[hg19:15:101923953-101923976:-]	0.572	124	0	-15.1	-1.2693
MIMAT0003261	hsa-miR-593*	2889	RAPGEF1	uc004cbb.2	NM_198679	cgacucGUUACGGACCGAC-CACGGa	| || || |||| |||||	ccuccuCCAUCGCUCGCUGUGUGCCu	2	20	898	923	[hg19:9:134453961-134453986:-]	0.5224	127	0	-19.67	-0.188
MIMAT0003261	hsa-miR-593*	4088	SMAD3	uc002aqj.2	NM_005902	cgacucgUUACGGACC--GACCACGGa	:| |:: || |||||||	uaccuaaGAGGUUAGGAAAUGGUGCCa	2	19	2486	2512	[hg19:15:67485360-67485386:+]	0.4972	141	7	-19.94	-0.2017
MIMAT0003261	hsa-miR-593*	10218	ANGPTL7	uc001ase.2	NM_021146	cgACUCGUUACGGACCG-ACC-ACGGa	||: ||: |:|| | ||| ||||	ggUGGACAGAGUCUCUCAUGGAUGCCg	2	24	677	703	[hg19:1:11255757-11255783:+]	0.5255	126	0	-19.66	-0.3185
MIMAT0003261	hsa-miR-593*	339290	LOC339290	uc002kmo.2	NR_015389	cgacuCGUUAC--GGACCGACCACGGa	|||:|| | |:|||||||	aaguuGCAGUGAAACAAGUUGGUGCCa	2	21	1339	1365	[hg19:18:5243867-5243893:+]	0.5183	155	7	-25.22	-0.1473
MIMAT0003261	hsa-miR-593*	2104	ESRRG	uc001hkw.1	NM_001438	cgaCU-CGUUACGGACCGAC-CACGGa	|| ||||| : | |:|| |||||	acgGAUGCAAUUUAU-GUUGUGUGCCa	2	23	1141	1166	[hg19:1:216679115-216679140:-]	0.729	127	0	-18.26	-0.4961
MIMAT0003261	hsa-miR-593*	5718	PSMD12	uc002jfy.2	NM_002816	cgACUCGUUACG-GACCG---ACCACGga	| | | ||| :| || ||||||	ugUUAACUUUGCAUUUGCAAUUGGUGCaa	3	24	164	192	[hg19:17:65336767-65336795:-]	0.5147	125	0	-20.15	-0.1203
MIMAT0003261	hsa-miR-593*	8859	STK19	uc011fka.1	NM_004197	cgacUCGUUACGGAC-CGACCACGGa	||::: || | |||||||	ggaaAGUGGAACCAGAAAUGGUGCCa	2	22	217	242	[hg19:6_cox_hap2:3458799-3458824:+]	0.6075	144	7	-17.03	-0.6856
MIMAT0003261	hsa-miR-593*	8859	STK19	uc011fka.1	NM_004197	cgacucguuacggaccgACCACGGa	||||||:	uucccuuucguguaaaaUGGUGCUg	2	9	255	279	[hg19:6_cox_hap2:3458837-3458861:+]	0.6075	124	0	-12.87	-0.1166
MIMAT0003261	hsa-miR-593*	654433	LOC654433	uc002tjq.3	AK056355	cgacucGU-UACGGACCGACCACGGa	|| :|||: ||||||||	aauacaCAUGUGCUAUACUGGUGCCa	2	20	1710	1735	[hg19:2:114023962-114023987:+]	0.5058	154	7	-22.07	-0.3553
MIMAT0003261	hsa-miR-593*	665	BNIP3L	uc003xex.1	NM_004331	cgacUCGUUACGG-ACCGACCACGGa	||||:| |: | |||||||	cagcAGCAGUUCUAUCAGUGGUGCCa	2	22	2034	2059	[hg19:8:26269962-26269987:+]	0.5596	156	7	-20.09	-0.2898
MIMAT0003261	hsa-miR-593*	283651	C15orf21	uc001zvn.1	AY271967	cgacUCGUU--ACGGACCGACCA-CGGa	||||| | ||| |||| |||	acaaAGCAAGCAGGCUGUAUGGUAGCCu	2	22	57	84	[hg19:15:45803390-45803403,45805896-45805909:+]	0.6438	124	0	-22.36	-0.3367
MIMAT0003261	hsa-miR-593*	93589	CACNA2D4	uc001qjp.2	NM_172364	cgacucgUUACGGACCGACCACGGa	:||||:| |||||||	cuuucaaGAUGCUU-CAUGGUGCCc	2	19	191	214	[hg19:12:1902607-1902630:-]	0.4874	152	7	-20.69	-0.1599
MIMAT0003261	hsa-miR-593*	92370	ACPL2	uc003etv.2	NM_001037172	cgacuCGUUACGGAC-CG---ACCACGGa	|::|| :||| | ||||||:	caucuGUGAUUUCUGAACUAAUGGUGCUa	2	21	1274	1302	[hg19:3:141013321-141013349:+]	0.6815	130	0	-17.08	-0.1924
MIMAT0003261	hsa-miR-593*	55670	PEX26	uc002znp.3	NM_017929	cgacUCGUUACGGACCGACCACGGa	||::|| |:|| ||||||||	guaaAGUGAU-CUUGCCUGGUGCCu	2	22	923	946	[hg19:22:18571764-18571787:+]	0.6545	171	7	-25.96	-0.2863
MIMAT0003261	hsa-miR-593*	9788	MTSS1	uc003yrk.2	NM_014751	cgacucguuacggaccgaCCACGGa	||||||	ccuuuugauuuuucugaaGGUGCCa	2	8	242	266	[hg19:8:125564967-125564991:-]	0.7461	120	6	-16.12	-0.2452
MIMAT0003261	hsa-miR-593*	29058	C20orf30	uc002wlk.2	NM_001009923	cgacucGUUAC-GGACCGACC-ACGGa	||| | :| | |||| ||||	ugauucCAAGGAUCAGCCUGGAUGCCu	2	20	795	821	[hg19:20:5080616-5080642:-]	0.5969	122	0	-21.46	-0.3353
MIMAT0003261	hsa-miR-593*	1182	CLCN3	uc003ish.2	NM_173872	cgacuCGUUACGGACCGAC-CACGGa	| ||| :|| :|| |||||	agaacGAAAUCUCUCAUUGUGUGCCg	2	21	711	736	[hg19:4:170641927-170641952:+]	0.5837	124	0	-14.7	-0.5433
MIMAT0003261	hsa-miR-593*	55127	HEATR1	uc001hyd.1	NM_018072	cgaCUCGUUACG--GACCGACCACGGa	| || |||: || :|||||||	uggGUGCCAUGUUACU-UUUGGUGCCu	2	23	70	95	[hg19:1:236714107-236714132:-]	0.5439	151	7	-22.91	-1.0626
MIMAT0003261	hsa-miR-593*	55127	HEATR1	uc001hyd.1	NM_018072	cgacucguuacggaccgaCCACGGa	||||||	uuuuauuuuuggguguugGGUGCCa	2	8	54	78	[hg19:1:236714124-236714148:-]	0.5439	120	6	-16.04	-0.1602
MIMAT0003261	hsa-miR-593*	125111	GJD3	uc010cxa.1	BC153089	cgaCU-CG-UUACGGACCGACCACGGa	|| || |: || :|||||||	cgaGACGCUAGACCCAAUUUGGUGCCc	2	23	328	354	[hg19:17:38520506-38520532:+]	0.5141	144	7	-18.49	-0.2456
MIMAT0003261	hsa-miR-593*	51133	KCTD3	uc001hks.2	NM_016121	cgacucguuacggaCCGACCACGGa	|| |||||||	accacgucuuaauaGGAUGGUGCCc	2	12	280	304	[hg19:1:215794240-215794264:+]	0.5053	147	7	-17.58	-0.4828
MIMAT0003261	hsa-miR-593*	51133	KCTD3	uc001hks.2	NM_016121	cgaCUCGUUACGGACCGAC-CACGGa	|:|||| ||:| || |||||	caaGGGCAAAGCUU---UGAGUGCCc	2	23	723	745	[hg19:1:215794683-215794705:+]	0.5109	126	0	-20.75	-0.2247
MIMAT0003261	hsa-miR-593*	728798	FRMPD2L1	uc001jfy.3	NM_001042525	cgacucgUUACGGACCGACC-ACGGa	|:|||:| | ||| ||||	ugcacaaAGUGCUUUGAUGGUUGCCu	2	19	267	292	[hg19:10:48844508-48844533:-]	0.5887	130	0	-20.12	-0.4709
MIMAT0003261	hsa-miR-593*	84216	TMEM117	uc001rod.2	NM_032256	cgACUCGUUACGGACCGACCACGGa	|| ||| | | | |||||||	gaUGUUCAA-CCAUAG-UGGUGCCu	2	24	289	311	[hg19:12:44782744-44782766:+]	0.7022	147	7	-17.98	-0.8972
MIMAT0003261	hsa-miR-593*	54097	FAM3B	uc002yza.2	BC036314	cgACUCGUUACGGACCGAC-CACGGa	||: | |||| :|| |||||	cgUGGUCUUCGCCUCCUUGUGUGCCu	2	24	1602	1627	[hg19:21:42694869-42694894:+]	0.744	123	0	-21.54	-0.1055
MIMAT0003261	hsa-miR-593*	64581	CLEC7A	uc001qxg.2	NM_197947	cgacucGUUACGGACCGACCACGGa	:| | :| |||||||:	uuuucaUACUUUCCCACUGGUGCUa	2	20	1485	1509	[hg19:12:10269548-10269572:-]	0.5705	131	0	-14.41	-0.1053
MIMAT0003261	hsa-miR-593*	8578	SCARF1	uc002fsz.1	NM_003693	cgacuCGUUACGGACC---GAC-CACGGa	|| :| ||||| ||| |||||	gcucuGCUGU-CCUGGACCCUGUGUGCCu	2	21	234	261	[hg19:17:1537791-1537818:-]	0.5433	121	0	-27.58	-0.2897
MIMAT0003261	hsa-miR-593*	1390	CREM	uc001iyb.2	NM_181571	cgACUCGUUACG-GACCGACCACGGa	|| | ||: || :||||||:	guUGCACUUUGUAGUGUUUGGUGCUc	2	24	571	596	[hg19:10:35501302-35501327:+]	0.712	134	0	-20.02	-0.161
MIMAT0003261	hsa-miR-593*	440515	ZNF506	uc010eci.2	NM_001099269	cgACUC-GUUACG--GACCGACC-ACGGa	|||| ||| || :| ||| ||||	aaUGAGACAAAGCGUUUAUAUGGUUGCCa	2	24	677	705	[hg19:19:19904656-19904684:-]	0.4896	121	0	-17.47	-0.6222
MIMAT0003261	hsa-miR-593*	79832	QSER1	uc001mty.2	NM_001076786	cgaCUCGUUACGGACCGACCACGGa	|||| | |:| :|||||||	guaGAGCUCUCCUU--UUGGUGCCu	2	23	1125	1147	[hg19:11:32999145-32999167:+]	0.6421	155	7	-25.74	-0.2692
MIMAT0003261	hsa-miR-593*	81786	TRIM7	uc003mmz.1	NM_203293	cgacUCGUUACGGACCGACCACGGa	||||: | | ||||||||	caacAGCAGAG-CACCCUGGUGCCa	2	22	1038	1061	[hg19:5:180621105-180621128:-]	0.545	155	7	-23.96	-0.1121
MIMAT0003261	hsa-miR-593*	10525	HYOU1	uc001pux.3	NM_001130991	cgACUCGUUACGGACC---GAC-CACGGa	| | ||: |::||| ||| |||||	agUUACCAG-GUUUGGUUUCUGAGUGCCu	2	24	458	485	[hg19:11:118915820-118915847:-]	0.5611	120	0	-22.87	-0.2654
MIMAT0003261	hsa-miR-593*	51765	MST4	uc004ewk.1	NM_016542	cgacucgUUACG--GACCGACCACGGa	||| | :| :|||||||	ccaagaaAAUUCUUUUUAUUGGUGCCu	2	19	1420	1446	[hg19:X:131209607-131209633:+]	0.5953	145	7	-17.29	-1.1518
MIMAT0003261	hsa-miR-593*	100151683	RNU4ATAC	uc010yzd.1	NR_023343	cgaCUCG-UUACGGA--CCGACCACGga	|||| |||:| :||||||	cuaGAGCUUUUGCUUUAUUUUGGUGCaa	3	23	90	117	[hg19:2:122288545-122288572:+]	0.6786	128	0	-22.71	-0.241
MIMAT0003261	hsa-miR-593*	57669	EPB41L5	uc010fll.2	AK023019	cgaCUCGUUACGGAC-CGACC-ACGGa	|||| || |:|| |||| ||||	ugaGAGC-AUCCUUGAUCUGGCUGCCu	2	23	403	428	[hg19:2:120932879-120932904:+]	0.562	131	0	-25.83	-0.1334
MIMAT0003261	hsa-miR-593*	4677	NARS	uc010xed.1	AK293985	cgacucguuacggacCGACCACGGa	| |||||||	caaacacaaguagaaGGUGGUGCCa	2	11	69	93	[hg19:18:55274520-55274544:-]	0.8052	142	7	-17.35	-1.0946
MIMAT0003261	hsa-miR-593*	643749	LOC643749	uc003pvb.2	BX647114	cgaCUCGUUACGGACCGACCACGGa	|| | :|| ||| |||||||	uagGAUCUGUG-GUGG-UGGUGCCu	2	23	132	154	[hg19:6:111824656-111824678:+]	0.6275	154	7	-21.6	-0.3817
MIMAT0003261	hsa-miR-593*	5664	PSEN2	uc009xeo.1	NM_000447	cgaCUCGUUACGGACCGACCACGGa	|| | | :|| :|||||||	gcaGAACCAGCUCU--UUGGUGCCa	2	23	142	164	[hg19:1:227083422-227083444:+]	0.5248	147	7	-17.15	-0.477
MIMAT0003261	hsa-miR-593*	339834	CCDC36	uc010hkt.2	AK058049	cgACUCGUUACGGACC---GACCACGGa	| ||| | |:||| :|||||||	uaUCAGC-ACCCUUGGACUUUGGUGCCc	2	24	579	605	[hg19:3:49274088-49274114:+]	0.8048	152	7	-23.98	-1.0374
MIMAT0003261	hsa-miR-593*	546	ATRX	uc004ecp.3	NM_000489	cgacucguuacgGACCGACCACGGa	||| |||||||	cacaucucuuaaCUGCAUGGUGCCa	2	14	815	839	[hg19:X:76762990-76763014:-]	0.6404	149	7	-16.78	-0.3808
MIMAT0003261	hsa-miR-593*	762	CA4	uc010wou.1	AK298710	cgacUCGUUACGGACCGACCACGGa	| | | |||| :|||||||	cuccAACUACCCCUGCUUGGUGCCa	2	22	187	211	[hg19:17:58232709-58232728,58233921-58233925:+]	0.6135	161	7	-21.8	-0.481
MIMAT0003261	hsa-miR-593*	124149	ANKRD26P1	uc002eeb.3	NR_026556	cgACUCGUUACGGACCGACCACGGa	||||||:| | |||||||	ugUGAGCAGU---U--AUGGUGCCa	2	24	34	53	[hg19:16:46505827-46505840,46508161-46508166:-]	0.5781	148	7	-22.5	-0.4438
MIMAT0003261	hsa-miR-593*	857	CAV1	uc003vif.1	NM_001753	cgacucGUUACGGACCGACCACGGa	:||| :| ||||||||	uccuuuUAAU--UUUCCUGGUGCCa	2	20	38	60	[hg19:7:116199379-116199401:+]	0.573	148	7	-15.85	-0.9284
MIMAT0003261	hsa-miR-593*	25897	RNF19A	uc003yjj.1	NM_015435	cgacucGUUACGGACCGACCACGGa	|| || :| :|||||||	guacccCAUUGAUU-CUUGGUGCCu	2	20	781	804	[hg19:8:101269980-101270003:-]	0.623	149	7	-17.54	-0.6635
MIMAT0003261	hsa-miR-593*	57698	KIAA1598	uc001lcz.3	NM_018330	cgACUCGUUACGGACCGACCA-CGGa	||:| :||||: ||||| |||	cgUGGG-GAUGCU---CUGGUAGCCu	2	24	854	875	[hg19:10:118645191-118645212:-]	0.5602	121	0	-23.58	-0.1685
MIMAT0003261	hsa-miR-593*	5168	ENPP2	uc003yos.1	NM_006209	cgacUCGUUACGGACCGACCACGGa	:| |: :|| ||||||:	uaguGGAAGCUUCUAAAUGGUGCUg	2	22	225	249	[hg19:8:120569512-120569536:-]	0.7565	129	0	-14.72	-0.1648
MIMAT0003261	hsa-miR-593*	8437	RASAL1	uc001tum.1	NM_004658	cgaCUCGUUACGGACC--GAC-CACGGa	||| :||||| | ||| |||||	ccaGAGACGUGCCUAGUCCUGUGUGCCu	2	23	119	146	[hg19:12:113537588-113537615:-]	0.5373	133	0	-27.16	-0.2152
MIMAT0003261	hsa-miR-593*	79770	TXNDC15	uc011cxv.1	AK056512	cgACUCGUUACGGACCGACCACGGa	|| : | || | |||||||	ccUGUUUUACACCCCG-UGGUGCCg	2	24	1297	1320	[hg19:5:134229229-134229252:+]	0.7869	141	7	-17.77	-0.1235
MIMAT0003261	hsa-miR-593*	26234	FBXL5	uc003goc.1	NM_012161	cgACUCGUUACGGACCGACCACGGa	||||| | |:|| :|||||||	guUGAGCCA-GUCU-AUUGGUGCCa	2	24	1136	1158	[hg19:4:15606188-15606210:-]	0.5075	163	7	-27.64	-0.5763
MIMAT0003261	hsa-miR-593*	51701	NLK	uc010crj.2	NM_016231	cgacucguuacggacCGACCACGga	| ||||||	gaauuacuaaacaaaGAUGGUGCaa	3	11	1496	1520	[hg19:17:26523158-26523182:+]	0.8261	122	0	-11.3	-0.5028
MIMAT0003261	hsa-miR-593*	64787	EPS8L2	uc001lqt.2	NM_022772	cgacucguuACGGACCGACCACGGa	|||:||| |||||||	caaaccugcUGCUUGG-UGGUGCCa	2	17	209	232	[hg19:11:727190-727213:+]	0.4963	162	7	-26.12	-0.1542
MIMAT0003261	hsa-miR-593*	64787	EPS8L2	uc001lqt.2	NM_022772	cgaCUCGUUA-CGGACCG-ACCACGGa	|:|:: | |: || | |||||||	uggGGGUGCUGGUGUGUCUUGGUGCCu	2	23	641	667	[hg19:11:727622-727648:+]	0.5042	152	7	-27.24	-0.1342
MIMAT0003261	hsa-miR-593*	5900	RALGDS	uc004cco.2	NM_006266	cgacucguuACGGACCGACCA-CGGa	|| ||||||||| |||	cccagggucUGGCUGGCUGGUAGCCa	2	17	10	35	[hg19:9:135973939-135973964:-]	0.4678	136	0	-29.17	-0.458
MIMAT0003261	hsa-miR-593*	8493	PPM1D	uc010ddm.1	AK299773	cgaCUCGUUACGGACCGACCACGGa	|:|| | : :|||||||	agaGGGCUUUUUAAAUUUGGUGCCg	2	23	2193	2217	[hg19:17:58740955-58740979:+]	0.6731	142	7	-18.9	-0.6357
MIMAT0003261	hsa-miR-593*	124401	ANKS3	uc002cxj.1	NM_133450	cgACUCGUUACGGAC--CGAC-CACGGa	||: | | |||| |||| |||||	auUGGUCCA-CCCUGAAGCUGUGUGCCa	2	24	28	54	[hg19:16:4746855-4746881:-]	0.5317	124	0	-22.31	-0.1374
MIMAT0003261	hsa-miR-593*	9908	G3BP2	uc003his.2	NM_203505	cgacuCGUUA--CGGACCGACCACGGa	|:||| || | | |||||||	guaauGUAAUAAGCAU-GAUGGUGCCu	2	21	873	898	[hg19:4:76569716-76569741:-]	0.7843	153	7	-19.53	-1.0564
MIMAT0003261	hsa-miR-593*	5892	RAD51L3	uc002hir.2	NM_002878	cgacUCGUUACGGACCGACCACGGa	|| ||| | | ||||||||	acccAGAAAUUCAU-ACUGGUGCCa	2	22	202	225	[hg19:17:33427747-33427770:-]	0.5774	159	7	-17.15	-0.3605
MIMAT0003261	hsa-miR-593*	5892	RAD51L3	uc002hir.2	NM_002878	cgacucguuacggACCGACCACGGa	|| |||||||	cacucauuuaauaUGCAUGGUGCCc	2	13	785	809	[hg19:17:33427163-33427187:-]	0.6755	144	7	-16.81	-0.4533
MIMAT0003261	hsa-miR-593*	56256	SERTAD4	uc001hhy.2	NM_019605	cgaCUCGUUACGGACCGACCACGGa	|:||:|| :| :|||||||	acaGGGCGAU--UU--UUGGUGCCu	2	23	660	680	[hg19:1:210416342-210416362:+]	0.7438	148	7	-23.23	-1.1869
MIMAT0003261	hsa-miR-593*	151056	PLB1	uc002rmb.1	NM_153021	cgacucguuacgGACCGACC-ACGGa	|||||||| ||||	ggaauuuuggagCUGGCUGGUUGCCa	2	14	416	441	[hg19:2:28866343-28866368:+]	0.5176	129	0	-24.22	-0.5331
MIMAT0003261	hsa-miR-593*	57498	KIDINS220	uc002qzc.2	NM_020738	cgacucguuacggaccgACCACGGa	|||||||	ucuccaacucuuuuaaaUGGUGCCc	2	9	767	791	[hg19:2:8870059-8870083:-]	0.5034	140	7	-14.9	-0.6298
MIMAT0003261	hsa-miR-593*	100379661	C21orf41	uc002ynp.1	AY081145	cgacucGUUACGGACCGACCACGGa	||: :| ||||||||	gucucaCAGAAGUUACCUGGUGCCa	2	20	718	742	[hg19:21:30969077-30969098,30969890-30969892:+]	0.5406	147	7	-17.16	-0.4021
MIMAT0003261	hsa-miR-593*	100379661	C21orf41	uc002ynp.1	AY081145	cgacuCGUUACGGACCGACC-ACGGa	|::: | |||||||| ||||	ccaucGUGGAGACUGGCUGGAUGCCc	2	21	755	780	[hg19:21:30969905-30969930:+]	0.5443	136	0	-27.02	-0.1739
MIMAT0003261	hsa-miR-593*	2962	GTF2F1	uc002meq.2	NM_002096	cgacuCGUUAC--GGACCGACCACGGa	|||:|| |: | |||||||	aggcuGCAGUGAACUAUGAUGGUGCCa	2	21	459	485	[hg19:19:6379807-6379833:-]	0.5095	155	7	-24.15	-0.7998
MIMAT0003261	hsa-miR-593*	2030	SLC29A1	uc011dvq.1	AK293558	cgacucguuacggaccGACCACGGa	:|||||||	ccuguuuccccagcauUUGGUGCCa	2	10	211	235	[hg19:6:44198071-44198095:+]	0.7528	141	7	-16.9	-1.1002
MIMAT0003261	hsa-miR-593*	10943	MSL3	uc004cuw.2	NM_078629	cgACUCGUUACGGACCGA-CCACGGa	| || |||| :| || ||||||	ugUUAGGAAUGAUUCCCUGGGUGCCu	2	24	158	183	[hg19:X:11793356-11793381:+]	0.5787	135	6	-23.15	-0.4263
MIMAT0003261	hsa-miR-593*	3077	HFE	uc003nfx.1	NM_000410	cgacuCGUUACGGACCGACCACGGa	|||| |::| |||||||	gauuuGCAAAGUUU-AAUGGUGCCu	2	21	726	749	[hg19:6:26095180-26095203:+]	0.5098	154	7	-21.2	-0.8151
MIMAT0003261	hsa-miR-593*	83605	CCM2	uc003tmo.2	NM_031443	cgACUCGUUACG-GACCGACC-ACGGa	||| :||| : | |||| ||||	ugUGAAUAAUUUAAUCUCUGGUUGCCa	2	24	383	409	[hg19:7:45116039-45116065:+]	0.5843	122	0	-16.03	-0.8668
MIMAT0003261	hsa-miR-593*	119504	ANAPC16	uc001jsv.2	NM_173473	cgacuCGUUACGGACCGACCACGGa	|: || | | |||||||	guccuGUCAUCCAU--AUGGUGCCu	2	21	333	355	[hg19:10:73993207-73993229:+]	0.5906	141	7	-20.33	-0.2463
MIMAT0003261	hsa-miR-593*	1956	EGFR	uc011kcq.1	EF210210	cgacuCGU-UACGGACCG-AC-CACGGa	||| | ||| | | || |||||	aguacGCAGACGCCGGCCAUGUGUGCCa	2	21	396	423	[hg19:7:55233076-55233103:+]	0.7468	122	0	-21.44	-0.6666
MIMAT0003261	hsa-miR-593*	64849	SLC13A3	uc002xsf.1	NM_022829	cgACUCGUU---ACGGACCGACCACGGa	|| |::| |||:| |:|||||||	agUGUGUGAUUUUGCUUAGUUGGUGCCc	2	24	480	507	[hg19:20:45188154-45188181:-]	0.5407	166	7	-24.38	-0.2442
MIMAT0003261	hsa-miR-593*	2740	GLP1R	uc003ooj.3	NM_002062	cgACUCGUUACGGACCGACCACGGa	||||: ||::| |||||||	uuUGAGU--UGUUU---UGGUGCCu	2	24	693	712	[hg19:6:39054542-39054561:+]	0.5508	148	7	-22.57	-0.2335
MIMAT0003261	hsa-miR-593*	6992	PPP1R11	uc011hkt.1	BC003144	cgacucguuacggaccGACCACGGa	:|||||||	------------gcauUUGGUGCCg	2	10	1	13	[hg19:6_mcf_hap5:1416830-1416842:+]	0.6629	141	7	-14.25	-0.2689
MIMAT0003261	hsa-miR-593*	55743	CHFR	uc001ulf.2	NM_001161344	cgacucguuacggaCCGACCACGGa	| :||||||:	uuuuauuuuaauagGUUUGGUGCUu	2	12	481	505	[hg19:12:133417635-133417659:-]	0.6627	127	0	-15.6	-0.1199
MIMAT0003261	hsa-miR-593*	441818	WBP11P1	uc010dmc.2	NR_003558	cgacUCGUUACGGACCGACCACGGa	||::| ||| | |||||||	uuacAGUGA-GCCAAGAUGGUGCCa	2	22	2769	2792	[hg19:18:30094394-30094417:+]	0.5115	159	7	-20.5	-0.1914
MIMAT0003261	hsa-miR-593*	168448	CDC14C	uc010kyv.1	NR_003595	cgACUCGUU-ACGG---ACCGACC-ACGGa	||:| :: |||| || :||| ||||	acUGGGAGGUUGCCCAUUGUUUGGUUGCCa	2	24	1374	1403	[hg19:7:48966986-48967015:+]	0.5065	121	0	-25.49	-0.3879
MIMAT0003261	hsa-miR-593*	56911	C21orf7	uc010gln.2	AF269163	cgACUCGUUACGGACCGAC-CACGGa	||: || | |:||| || |||||	uuUGGACAUUACUUGGGUGAGUGCCc	2	24	1863	1888	[hg19:21:30547967-30547992:+]	0.5678	139	0	-24.54	-0.4892
MIMAT0003261	hsa-miR-593*	6338	SCNN1B	uc002dln.2	NM_000336	cgaCUCGUUACGGACCGACCACGGa	||| | ||| |||||||	cccGAGGCCUCACUGUAUGGUGCCc	2	23	56	80	[hg19:16:23392178-23392202:+]	0.5167	154	7	-20.39	-0.1929
MIMAT0003261	hsa-miR-593*	29123	ANKRD11	uc002fng.1	BC088729	cgACU-CGUUACGGAC--CGACCACGGa	||| |: |||::|| ||||||||	ccUGACGUCAUGUUUGUUCCUGGUGCCu	2	24	101	128	[hg19:16:89367094-89367121:-]	0.5187	165	7	-31.41	-0.1103
MIMAT0003261	hsa-miR-593*	29123	ANKRD11	uc002fng.1	BC088729	cgacucguuacGGACC---GACCACGGa	||||| ||||||||	----augacacCCUGGUCUCUGGUGCCu	2	15	1	24	[hg19:16:89367198-89367221:-]	0.5332	153	7	-28.63	-0.1375
MIMAT0003261	hsa-miR-593*	51693	TRAPPC2L	uc002fmc.2	NM_016209	cgaCUCGUUA--CGGAC-CGACC-ACGGa	|:|| :| |:||| |||| ||||	gugGGGCCGUCGGUCUGUUCUGGUUGCCu	2	23	48	76	[hg19:16:88927415-88927443:+]	0.4969	124	0	-26.46	-0.1494
MIMAT0003261	hsa-miR-593*	8515	ITGA10	uc001eoa.2	NM_003637	cgACUCGUU--ACGGACCGA-CCACGGa	| | :|| | ::|| || ||||||	aaUCAAUAAUUUUUUUGCCUAGGUGCCu	2	24	301	328	[hg19:1:145542579-145542606:+]	0.6385	122	6	-18.69	-0.4556
MIMAT0003261	hsa-miR-593*	151188	ARL6IP6	uc002tym.2	NR_024526	cgacuCGUUACGGAC--CG-ACCACGGa	|| | ||| || |||||||	uagcuGCUCUUACUGUAGCAUGGUGCCu	2	21	334	361	[hg19:2:153616320-153616347:+]	0.8078	146	7	-24.41	-0.4703
MIMAT0003261	hsa-miR-593*	3535	IGL@	uc002zws.2	BC012159	cgacuCGUUACGGACCG--ACCA-CGGa	|| : |:||||| |||| |||	cugcuGCUGGGUCUGGCCAUGGUCGCCc	2	21	353	380	[hg19:22:23230312-23230339:+]	0.5646	127	0	-26.7	-0.1393
MIMAT0003261	hsa-miR-593*	22807	IKZF2	uc002vem.2	NM_016260	cgacucguuacggaccGACCACGGa	:|||||||	acuuauguucuuuauaUUGGUGCCu	2	10	4139	4163	[hg19:2:213867921-213867945:-]	0.7004	141	7	-17.68	-0.2457
MIMAT0003261	hsa-miR-593*	10099	TSPAN3	uc002bcj.2	NM_005724	cgaCUCGUUACGGACCGACCACGGa	|: :|| || | |||||||	uaaGGUUAACACC-AGAUGGUGCCc	2	23	423	446	[hg19:15:77338731-77338754:-]	0.6301	148	7	-16.75	-0.3963
MIMAT0003261	hsa-miR-593*	51029	PPPDE1	uc001iao.2	NM_016076	cgACUCGUUA-CGGACCGACCA-CGGa	||:| ||| ||| |||| |||	ugUGGG-AAUAUCCUAAGUGGUAGCCu	2	24	850	875	[hg19:1:244869941-244869966:+]	0.6728	120	0	-19.47	-0.2056
MIMAT0003261	hsa-miR-593*	284459	HKR1	uc010xto.1	AK299969	cgACUCGUUACGGACCGACCACGGa	|| || ::|| |||||||	ugUGCCCACCUUUUGAGUGGUGCCu	2	24	469	493	[hg19:19:37855146-37855170:+]	0.5048	151	7	-20.31	-0.3183
MIMAT0003261	hsa-miR-593*	100131755	ARMCX4	uc004eht.2	AK125041	cgacucguuacggaccGACCACGGa	||||||||	aaaugggacacauuaaCUGGUGCCa	2	10	682	706	[hg19:X:100753407-100753431:+]	0.5914	145	7	-19.95	-0.1739
MIMAT0003261	hsa-miR-593*	8555	CDC14B	uc004awj.2	NM_033331	cgACUCGUU-ACGG---ACCGACC-ACGGa	||:| :: |||| || :||| ||||	acUGGGAGGCUGCCCAUUGUUUGGUUGCCa	2	24	759	788	[hg19:9:99265247-99265276:-]	0.5268	121	0	-24.82	-0.2531
MIMAT0003261	hsa-miR-593*	57447	NDRG2	uc001vyx.2	NM_201539	cgacuCGUUACGGAC-CGACCACGGa	|: :| :|| ||||||||	agguuGUUGUAGUUGUCCUGGUGCCu	2	21	315	340	[hg19:14:21485415-21485440:-]	0.6152	147	7	-27.64	-0.2079
MIMAT0003261	hsa-miR-593*	5621	PRNP	uc002wky.2	NM_001080123	cgacucgUUACGGACC--GACCACGGa	||||::||| |||||||	gaaaucaAAUGUUUGGGAAUGGUGCCc	2	19	717	743	[hg19:20:4681345-4681371:+]	0.5059	161	7	-25.5	-0.1914
MIMAT0003261	hsa-miR-593*	10810	WASF3	uc001uqv.2	NM_006646	cgacucGUU-ACGGACCG-ACCA-CGGa	||: | |:|||| |||| |||	ugcuuuCAGUUUCUUGGCUUGGUAGCCu	2	20	524	551	[hg19:13:27260506-27260533:+]	0.5482	125	0	-26.34	-0.1112
MIMAT0003261	hsa-miR-593*	132228	C3orf45	uc003cyz.2	NM_153215	cgacUCGUUACGGACCGACCACGGa	||| | |||| ||||||||	gccuAGCCAAGCCU--CUGGUGCCa	2	22	182	204	[hg19:3:50324815-50324837:+]	0.6337	166	7	-24.97	-0.164
MIMAT0003261	hsa-miR-593*	3300	DNAJB2	uc002vkx.1	NM_006736	cgacUCGUUAC-GGAC-CGACC-ACGGa	|| :|| :||| ||||| ||||	ccccAGAUGUGUUCUGAGCUGGAUGCCg	2	22	994	1021	[hg19:2:220150703-220150730:+]	0.7401	127	0	-22.94	-0.2388
MIMAT0003261	hsa-miR-593*	25827	FBXL2	uc011axq.1	AK316229	cgacucguuACGGACCGACCACGGa	||:||| |||||||	auuuccugcUGUCUG--UGGUGCCu	2	17	265	287	[hg19:3:33344600-33344622:+]	0.6322	153	7	-23.72	-0.1084
MIMAT0003261	hsa-miR-593*	50809	HP1BP3	uc001bdw.1	NM_016287	cgacucgUUACG-GACCGACCACGGa	::||| :| :|||||||	agcuuuaGGUGCUUUUAUUGGUGCCu	2	19	160	185	[hg19:1:21071105-21071130:-]	0.6304	149	7	-25.9	-0.6196
MIMAT0003261	hsa-miR-593*	728621	CCDC30	uc009vwk.1	NM_001080850	cgacucguuacggaccGACCACGGa	||||||||	-----------aaucaCUGGUGCCu	2	10	1	14	[hg19:1:43119700-43119713:+]	0.629	145	7	-18.66	-0.2987
MIMAT0003261	hsa-miR-593*	346653	FAM71F2	uc003vnl.2	BC105731	cgacucGUUACGGACCGACCACGGa	|| | ||| ||||||||	caaauuCACUCACUGCCUGGUGCCc	2	20	640	664	[hg19:7:128317813-128317837:+]	0.8331	163	7	-21.78	-0.4754
MIMAT0003261	hsa-miR-593*	90861	HN1L	uc010brt.2	AK309909	cgACUCGUUACGGAC-CGACCACGGa	| | :| | :|| :|||||||	cuUCAUGGAAGAUUGUUUUGGUGCCc	2	24	1047	1072	[hg19:16:1749586-1749611:+]	0.5161	146	7	-17.17	-0.1133
MIMAT0003261	hsa-miR-593*	3611	ILK	uc001mef.2	NM_004517	cgacUCGUUACGGACCGACC-ACGGa	||||: |||| |||| ||||	aagcAGCAG-GCCU--CUGGUUGCCu	2	22	66	88	[hg19:11:6631908-6631930:+]	0.7292	128	0	-25.99	-0.3366
MIMAT0003261	hsa-miR-593*	57634	EP400	uc001ujl.2	NM_015409	cgacucguuacggaccGACCACGGa	:|||||||	aagcccuuguucagauUUGGUGCCu	2	10	2551	2575	[hg19:12:132564769-132564793:+]	0.5155	141	7	-19.32	-0.2801
MIMAT0003261	hsa-miR-593*	10385	BTN2A2	uc003nhq.2	NM_006995	cgacucguuACGGACCGA-CCACGGa	|| :||||| ||||||	cucuccuucUG-UUGGCUGGGUGCCc	2	17	1443	1467	[hg19:6:26394638-26394662:+]	0.5069	126	6	-22.61	-0.2438
MIMAT0003261	hsa-miR-593*	10229	COQ7	uc002dfr.2	NM_016138	cgACUCG-UUA-CGGACCGACC-ACGGa	| ||: :|| ||| |||| ||||	gaUCAGUGGAUCUCCUCUCUGGCUGCCc	2	24	1337	1364	[hg19:16:19090817-19090844:+]	0.5224	121	0	-23.29	-0.3749
MIMAT0003261	hsa-miR-593*	5800	PTPRO	uc001rda.1	NM_030670	cgACUCGUUACGGACCGACCACGGa	|||||||| | | |||||||	ucUGAGCAAU--C--G-UGGUGCCu	2	24	1866	1885	[hg19:12:15749841-15749860:+]	0.6609	155	7	-27.57	-0.1293
MIMAT0003261	hsa-miR-593*	5142	PDE4B	uc001dco.2	NM_002600	cgacucguuACGGACCGAC-CACGGa	|||| ||| |||||	cccuuugucUGCCAACCUGUGUGCCu	2	17	378	403	[hg19:1:66838739-66838764:+]	0.6509	120	0	-21.39	-0.9316
MIMAT0003261	hsa-miR-593*	260429	PRSS33	uc002cro.1	NM_152891	cgacucguuacGGACC-GAC-CACGGa	:|||| ||| |||||	auugcugcccaUCUGGCCUGUGUGCCc	2	15	322	348	[hg19:16:2834297-2834323:-]	0.5268	121	0	-26.1	-0.475
MIMAT0003261	hsa-miR-593*	5147	PDE6D	uc002vsf.1	CR609911	cgaCUCGUUACGGACCGACCACGGa	|||| :|| ||| |||||||	uggGAGC-GUGGAUGG-UGGUGCCu	2	23	140	162	[hg19:2:232602490-232602512:-]	0.5395	162	7	-30.1	-0.1762
MIMAT0003261	hsa-miR-593*	3845	KRAS	uc001rgq.1	NM_004985	cgACUCGUUACGGACCGAC-CACGGa	| ||||| :| :|| |||||	auUCAGCAAAUAUUUAUUGAGUGCCu	2	24	2548	2573	[hg19:12:25360156-25360181:-]	0.5448	123	0	-18.26	-0.1136
MIMAT0003261	hsa-miR-593*	8028	MLLT10	uc001iqt.2	BC129946	cgacUCGUUACGGACCGACC-ACGGa	|||| | | | |||| ||||	uucuAGCACUUCAU--CUGGCUGCCu	2	22	37	60	[hg19:10:22030949-22030972:+]	0.6246	122	0	-21.12	-0.4867
MIMAT0003261	hsa-miR-593*	9882	TBC1D4	uc001vjl.1	NM_014832	cgACUCG-UUACGG----ACCGACCACGGa	||| : ||| || | :|||||||	ugUGAAUGAAUUCCUCUUUAUUUGGUGCCa	2	24	869	898	[hg19:13:75860030-75860059:-]	0.563	145	7	-17.57	-0.9557
MIMAT0003261	hsa-miR-593*	9882	TBC1D4	uc001vjl.1	NM_014832	cgaCUCGUUACGGACCGACCA-CGGa	| |::|||| | |||| |||	uggGUGUGAUGCACCGAUGGUAGCCa	2	23	1815	1840	[hg19:13:75859088-75859113:-]	0.5881	126	0	-18.38	-0.3476
MIMAT0003261	hsa-miR-593*	647121	LOC647121	uc001eiu.1	NR_003955	cgACUCGUUACGGACCGACCACGGa	||:| :|| :| ||||||||	gaUGGGGGAU--UUUACUGGUGCCa	2	24	843	865	[hg19:1:121306525-121306547:+]	0.5817	156	7	-21.48	-0.1127
MIMAT0003261	hsa-miR-593*	152185	CCDC52	uc003eah.1	AK126897	cgaCUCGU-UACGGACCGACCACGGa	||||| || ::| |||||||	ucaGAGCAUAUAUUU---UGGUGCCu	2	23	14	36	[hg19:3:113169070-113169092:-]	0.4946	153	7	-23.33	-0.2325
MIMAT0003261	hsa-miR-593*	692158	SNORA57	uc009yoa.1	NR_004390	cgaCUCGUUACGGACCGACCACGGa	|| |:: ||:|| |||||||	gggGAUCGG-GCUUG--UGGUGCCg	2	23	16	37	[hg19:11:62432909-62432930:+]	0.7645	153	7	-22.4	-0.1139
MIMAT0003261	hsa-miR-593*	79005	SCNM1	uc010pcs.1	AK301644	cgACUCG--UUACGGACCGAC-CACGGa	| ||| ::||: ||| || |||||	aaUUAGCUGGGUGUGUGG-UGUGUGCCu	2	24	177	203	[hg19:1:151140158-151140184:+]	0.5078	124	0	-28.44	-0.3888
MIMAT0003261	hsa-miR-593*	79960	PHF17	uc003igm.2	BC032376	cgacucGUUACGGACCGAC-CACGGa	:||| | | ||| |||||	uccuuuUAAUACACGACUGAGUGCCa	2	20	1270	1295	[hg19:4:129784677-129784702:+]	0.4797	123	0	-14.54	-0.2658
MIMAT0003261	hsa-miR-593*	4293	MAP3K9	uc001xml.2	NM_033141	cgaCUCGUUACGGACCGACCACGGa	|:| | | || ||||||||	uugGGGGACUCACUCACUGGUGCCa	2	23	866	890	[hg19:14:71196207-71196231:-]	0.5766	158	7	-22.51	-0.2394
MIMAT0003261	hsa-miR-593*	92703	TMEM183A	uc001gyw.1	CR604212	cgACUCGUUACGGACCGACCACGGa	|| || || :||||||:	ugUGUUAAAACCCCAUUUGGUGCUa	2	24	235	259	[hg19:1:202992403-202992427:+]	0.7489	131	0	-12.67	-0.2604
MIMAT0003261	hsa-miR-593*	64766	S100PBP	uc001bwd.2	AK022965	cgacucguuacggaCCGACCACGGa	| :|||||||	auuaugaaacugaaGUUUGGUGCCu	2	12	3993	4017	[hg19:1:33324375-33324399:+]	0.7027	143	7	-20.95	-0.4853
MIMAT0003261	hsa-miR-593*	23309	SIN3B	uc002ney.1	NM_015260	cgacucguuaCGGACCGAC-CACGGa	|||| |||| |||||	ucuccuguggGCCU-GCUGUGUGCCa	2	16	164	188	[hg19:19:16989702-16989726:+]	0.5262	125	0	-25.24	-0.1206
MIMAT0003261	hsa-miR-593*	100128505	LOC100128505	uc004bju.1	AK057447	cgacUCGUUACGGACCGACC-ACGGa	| ||| || || ||| ||||	agaaAUCAAAACCAGGGUGGCUGCCa	2	22	1475	1500	[hg19:9:119324291-119324316:+]	0.6348	129	0	-18.16	-0.2325
MIMAT0003261	hsa-miR-593*	64236	PDLIM2	uc003xcc.1	NM_176871	cgacucguuACGGACCGACC-ACGGa	||||||| ||| ||||	cucaccuuuUGCCUGGGUGGCUGCCu	2	17	618	643	[hg19:8:22452780-22452805:+]	0.6072	136	0	-27.97	-0.1032
MIMAT0003261	hsa-miR-593*	1951	CELSR3	uc003cul.2	NM_001407	cgacUCGUU----ACGGACCGACCACGGa	||||| ||:||| |||||||	agcaAGCAAAAGUUGUCUG--UGGUGCCa	2	22	793	819	[hg19:3:48674819-48674845:-]	0.5555	157	7	-24.91	-0.3494
MIMAT0003261	hsa-miR-593*	5026	P2RX5	uc002fwi.2	NM_002561	cgacucguuacggaccgACCACGGa	|||||:|	ggucauaaaacaauaaaUGGUGUCa	2	9	609	633	[hg19:17:3576529-3576553:-]	0.581	124	0	-11.96	-0.1032
MIMAT0003261	hsa-miR-593*	115572	FAM46B	uc010ofj.1	NM_052943	cgacUCGUUACGGA-CCGACCA-CGGa	||||| |::| || |||| |||	acaaAGCAA-GUUUGGGGUGGUAGCCu	2	22	293	318	[hg19:1:27332117-27332142:-]	0.5728	130	0	-25.41	-0.5761
MIMAT0003261	hsa-miR-593*	51246	SHISA5	uc003ctp.1	NM_016479	cgacucguuaCGGACCGACC-ACGGa	|||| |||| ||||	gcauucccugGCCUCUCUGGCUGCCa	2	16	1	26	[hg19:3:48510480-48510505:-]	0.6209	123	0	-21.99	-0.3439
MIMAT0003261	hsa-miR-593*	3109	HLA-DMB	uc011fou.1	AK295872	cgacucguuacggaccGACCACGGa	||||||||	uuagauuucaacuauuCUGGUGCCa	2	10	379	403	[hg19:6_cox_hap2:4349041-4349065:-]	0.5927	145	7	-16.33	-0.8209
MIMAT0003261	hsa-miR-593*	100302090	DDX11L11	uc010sdi.1	AM992881	cgacucguuACGGACCG-ACCACGGa	| |||||| |||||||	auuucuaucUCCCUGGCUUGGUGCCa	2	17	385	410	[hg19:12:91564-91589:-]	0.5183	163	7	-26.33	-0.2673
MIMAT0003261	hsa-miR-593*	114786	XKR4	uc003xsf.2	NM_052898	cgacucguuacggacCGACCACGGa	|:|||||||	cacccuacuuugcaaGUUGGUGCCc	2	11	1671	1695	[hg19:8:56438457-56438481:+]	0.6679	146	7	-21.32	-0.1435
MIMAT0003261	hsa-miR-593*	3587	IL10RA	uc001prv.2	NM_001558	cgaCUCGUUACGGACCGAC-CACGGa	|:| | ||||| || |||||	gagGGGACAGGCCUG--UGCGUGCCa	2	23	1334	1357	[hg19:11:117871690-117871713:+]	0.5021	123	0	-23.26	-0.1414
MIMAT0003261	hsa-miR-593*	10491	CRTAP	uc003cfl.3	NM_006371	cgaCUCGUUACGGACCGACCACGGa	|:| || | : | :|||||||	guaGGGAAAAGGUGGAUUGGUGCCa	2	23	4472	4496	[hg19:3:33188412-33188436:+]	0.7259	158	7	-20.3	-0.4027
MIMAT0003261	hsa-miR-593*	29914	UBIAD1	uc001asg.2	NM_013319	cgacUCGU-UACGG-ACCGACCACGGa	|| | :|||: || :|||||||	ucguAGGAUGUGCUAUGAUUGGUGCCa	2	22	424	450	[hg19:1:11346612-11346638:+]	0.5015	159	7	-22.57	-0.3321
MIMAT0003261	hsa-miR-593*	2530	FUT8	uc001xip.2	NM_178154	cgACUCGUUACGGA--CCG-ACCACGGa	|| |::| |:| | |||||||	uuUGUGUGAGACUUAAAACAUGGUGCCu	2	24	332	359	[hg19:14:66209460-66209487:+]	0.7365	141	7	-20.06	-1.2223
MIMAT0003261	hsa-miR-593*	9747	FAM115A	uc003wdo.1	NM_014719	cgACUCGUUACGGACCGACCACGGa	| ||::| ||| | |||||||	cuUCAGUGA-GCCAUGAUGGUGCCa	2	24	970	993	[hg19:7:143550233-143550256:-]	0.51	161	7	-22.29	-0.2729
MIMAT0003261	hsa-miR-593*	124936	CYB5D2	uc002fxm.3	NM_144611	cgACUCGUUACGGACC----GAC-CACGGa	||||:|: ||| | :|| |||||	ccUGAGUAGGCCCUUGACACUUGUGUGCCc	2	24	47	76	[hg19:17:4060423-4060452:+]	0.5067	122	0	-26.03	-0.1246
MIMAT0003261	hsa-miR-593*	8675	STX16	uc002xzi.2	NM_001001433	cgacucguuACGGACCGACCACGGa	| || |:|||||||	gccuucccuUUCCAAGUUGGUGCCa	2	17	1540	1564	[hg19:20:57252887-57252911:+]	0.5127	152	7	-18.96	-0.1195
MIMAT0003261	hsa-miR-593*	114785	MBD6	uc001sol.1	AL834230	cgacucguuACG-GACCGACC-ACGGa	||| || ||||| ||||	uuuaaauucUGCGCU-GCUGGCUGCCa	2	17	605	630	[hg19:12:57920953-57920978:+]	0.7171	121	0	-18.96	-0.1972
MIMAT0003261	hsa-miR-593*	126536	LOC126536	uc010xow.1	BC144048	cgaCUCGUUACGGACCGAC-CACGGa	|: ||| | : |||| |||||	acaGGACAAAGAUGAGCUGCGUGCCc	2	23	174	199	[hg19:19:16132871-16132874,16133438-16133459:+]	0.6181	126	0	-20.66	-0.7977
MIMAT0003261	hsa-miR-593*	64755	C16orf58	uc002eci.1	NM_022744	cgacucguuACGGACCGACCACGGa	| || | |||||||	agccccaccUCCCAGCAUGGUGCCc	2	17	577	601	[hg19:16:31501555-31501579:-]	0.522	148	7	-18.89	-0.1355
MIMAT0003261	hsa-miR-593*	360132	FKBP9L	uc010kzl.2	NR_003949	cgacUCGUUACGGACCGACCACGGa	:||| | | |||||||	accuGGCACGAACCAGAUGGUGCCa	2	22	1	25	[hg19:7:55750317-55750341:-]	0.5473	145	7	-23.13	-0.6407
MIMAT0003261	hsa-miR-593*	360132	FKBP9L	uc010kzl.2	NR_003949	cgacuCGUUACGGACCGACCACGGa	| |:||| | |||||||	aggcuGGAGUGC--AG-UGGUGCCa	2	21	787	808	[hg19:7:55749534-55749555:-]	0.5281	143	7	-24.27	-0.1371
MIMAT0003261	hsa-miR-593*	54332	GDAP1	uc003yah.2	NM_018972	cgacucGUUAC-GGACCGACCACGGa	:| || ::| | |||||||	guuccuUACUGUUUUAGAUGGUGCCu	2	20	645	670	[hg19:8:75277247-75277272:+]	0.5436	150	7	-18.02	-0.3609
MIMAT0003261	hsa-miR-593*	114757	CYGB	uc002jru.1	NM_134268	cgACUCGUUACGGACCGA-CCACGGa	||| |: | | | || ||||||	cuUGA-CGCUCCAUUUCUGGGUGCCa	2	24	66	90	[hg19:17:74524570-74524594:-]	0.6456	121	6	-18.41	-0.4081
MIMAT0003261	hsa-miR-593*	10447	FAM3C	uc010lkm.2	NM_001040020	cgacucguuacggaccGACCACGGa	:||||||:	uauacuuuugggauuuUUGGUGCUu	2	10	1424	1448	[hg19:7:120989067-120989091:-]	0.6125	125	0	-16.32	-0.1038
MIMAT0003261	hsa-miR-593*	51629	SLC25A39	uc010wix.1	AK295478	cgACUCGUUACGGAC--CGA-CCACGGa	|| |: :| || | ||| ||||||	caUGUGUCGUACCGGGAGCUGGGUGCCu	2	24	167	194	[hg19:17:42398513-42398540:-]	0.7081	126	6	-21.89	-0.4336
MIMAT0003261	hsa-miR-593*	140883	ZNF280B	uc002zwc.1	NM_080764	cgacucguuACGGAC-C--GACCACGGa	|||:|| | ||||||||	uugucucccUGCUUGUGUUCUGGUGCCa	2	17	1858	1885	[hg19:22:22840207-22840234:-]	0.6158	154	7	-24.02	-0.273
MIMAT0003261	hsa-miR-593*	140883	ZNF280B	uc002zwc.1	NM_080764	cgacucgUUACGGA-CCGACCACGGa	||| | | |||||||	gcaauaaAAUUAAUAGAAUGGUGCCu	2	19	1112	1137	[hg19:22:22840955-22840980:-]	0.5576	141	7	-15.71	-0.3285
MIMAT0003261	hsa-miR-593*	284098	PIGW	uc002hmz.1	NM_178517	cgaCUCGUUACGGACCGACCACGGa	|: ::: |: | | |||||||	ccaGGCUGGAGUGUAG-UGGUGCCa	2	23	179	202	[hg19:17:34894644-34894667:+]	0.5004	144	7	-22.41	-0.1305
MIMAT0003261	hsa-miR-593*	2595	GANC	uc010ude.1	AK301467	cgacUCGUUACGGACCGACCACGGa	||::| | | ||||||||	uaacAGUGAAGAGU-CCUGGUGCCu	2	22	62	85	[hg19:15:42576301-42576324:+]	0.5626	151	7	-23.93	-0.2946
MIMAT0003261	hsa-miR-593*	3136	HLA-H	uc011fui.1	AK299998	cgACUCGUUACGG-ACCGACCACGGa	||:||: ||: ||| |||||||	agUGGGCG--GCUGUGG-UGGUGCCu	2	24	529	551	[hg19:6_dbb_hap3:1152294-1152316:+]	0.6427	157	7	-29.59	-0.1196
MIMAT0003261	hsa-miR-593*	10655	DMRT2	uc011llu.1	NM_006557	cgACUCGUUACGGACCGACCACGGa	|| ||| || | |||||||	ucUGCCCAA--CC-GCAUGGUGCCu	2	24	620	641	[hg19:9:1056394-1056415:+]	0.6781	146	7	-22.23	-0.3147
MIMAT0003261	hsa-miR-593*	10972	TMED10	uc001xrm.1	NM_006827	cgacucGUUACGGACCGACCACGGa	| || :||| ||||||||	ucuuucCUAUUUCUGACUGGUGCCu	2	20	2840	2864	[hg19:14:75598724-75598748:-]	0.5843	167	7	-24.49	-0.1881
MIMAT0003261	hsa-miR-593*	4430	MYO1B	uc010fsg.2	NM_001130158	cgacucguuacggaccGACCACGGa	:|||||||	auaaaauuguucuaauUUGGUGCCa	2	10	1177	1201	[hg19:2:192289863-192289887:+]	0.745	141	7	-14.64	-1.3245
MIMAT0003261	hsa-miR-593*	64121	RRAGC	uc001ccq.2	NM_022157	cgaCUCG-UUACGGA---CC---GACCACGGa	|||| : |||:| || ||||||||	uggGAGCUGCUGCUUGUGGGAAUCUGGUGCCu	2	23	75	106	[hg19:1:39305119-39305150:-]	0.6603	151	7	-30.39	-0.4528
MIMAT0003261	hsa-miR-593*	79087	ALG12	uc003biy.2	NM_024105	cgacucguuacGGACCGACCACGGa	|| ||||||||	gccgcacccccCCACCCUGGUGCCa	2	15	472	496	[hg19:22:50296990-50297014:-]	0.4748	146	7	-17.92	-0.1115
MIMAT0003261	hsa-miR-593*	3383	ICAM1	uc002mnq.2	NM_000201	cgacUCGUUACGGACC-G-AC-CACGGa	:|: |||:|||| | || |||||	cagcGGUCAUGUCUGGACAUGAGUGCCc	2	22	877	904	[hg19:19:10396840-10396867:+]	0.5145	131	0	-27.64	-0.1653
MIMAT0003261	hsa-miR-593*	11132	CAPN10	uc010fzg.1	AF089092	cgaCUC-GUUACGGACCGAC-CACGGa	||| |: |||: |||| |||||	cagGAGCCGCUGCUGAGCUGCGUGCCa	2	23	1711	1737	[hg19:2:241537350-241537376:+]	0.699	133	0	-26.29	-0.1497
MIMAT0003261	hsa-miR-593*	5781	PTPN11	uc001ttx.2	NM_002834	cgACUCGUUACGGACCGACCA-CGGa	||| ||:||::| :|||| |||	aaUGACCAGUGUUU--UUGGUCGCCa	2	24	782	805	[hg19:12:112944378-112944401:+]	0.5549	132	0	-21.35	-0.3891
MIMAT0003261	hsa-miR-593*	22930	RAB3GAP1	uc010fnh.1	BC146809	cgacUCGU-UACGGACCGACCACGGa	|||| : | | |:|||||||	gaaaAGCAGGAGACCAGUUGGUGCCa	2	22	1718	1743	[hg19:2:135893228-135893253:+]	0.6117	156	7	-23.81	-0.3153
MIMAT0003261	hsa-miR-593*	22930	RAB3GAP1	uc010fnh.1	BC146809	cgACUCGUU-ACGGACCGACCACGGa	| :|||| | | :|||||||	guUUGGCAAGUUACCAUUUGGUGCCu	2	24	858	883	[hg19:2:135881775-135881800:+]	0.7757	150	7	-23.88	-0.4786
MIMAT0003261	hsa-miR-593*	203068	TUBB	uc011jhh.1	NM_178014	cgacucguUACGGACCGACCACGGa	|| :|| ||||||||	gacccuguAUUUCUUUCUGGUGCCc	2	18	234	258	[hg19:6_ssto_hap7:2024715-2024739:+]	0.645	157	7	-21.83	-0.4483
MIMAT0003261	hsa-miR-593*	56946	C11orf30	uc001oxk.2	BC021688	cgAC-UCGUUACGGACCGACCACGGa	|| :|:| | | |||||||	ugUGUGGUACUCAAUAAAUGGUGCCu	2	24	964	989	[hg19:11:76170374-76170399:+]	0.5847	142	7	-19.44	-0.8334
MIMAT0003261	hsa-miR-593*	151056	PLB1	uc002rmf.1	CR612785	cgacucguuacgGACCGACC-ACGGa	|||||||| ||||	ggaauuuuggagCUGGCUGGUUGCCa	2	14	1977	2002	[hg19:2:28866343-28866368:+]	0.5176	129	0	-24.22	-0.2554
MIMAT0003261	hsa-miR-593*	51631	LUC7L2	uc003vux.2	NM_016019	cgacucguuACGGACCGACCACGGa	||::| |||||||	gggguuuuuUGUUU-AAUGGUGCCu	2	17	550	573	[hg19:7:139107636-139107659:+]	0.6031	142	7	-22.48	-1.17
MIMAT0003261	hsa-miR-593*	1999	ELF3	uc001gxh.3	NM_004433	cgacucguuacGGACCGACCACGGa	::| ||||||||	guguaucuccuUUUAUCUGGUGCCu	2	15	244	268	[hg19:1:201984695-201984719:+]	0.4312	146	7	-20.73	-0.1457
MIMAT0003261	hsa-miR-593*	1267	CNP	uc002hyl.1	NM_033133	cgacucguuacGGACCGACC-ACGGa	:|||| ||| ||||	auuuucuggguUCUGGGUGGUUGCCc	2	15	2779	2804	[hg19:17:40128721-40128746:+]	0.6476	122	0	-27.81	-0.208
MIMAT0003261	hsa-miR-593*	80851	SH3BP5L	uc001iew.1	NM_030645	cgACU-CGUUACGGAC-CGAC-CACGGa	||| ||| | ||| | || |||||	ccUGAGGCACU--CUGCGAUGUGUGCCc	2	24	609	634	[hg19:1:249105465-249105490:-]	0.5381	122	0	-22.97	-0.14
MIMAT0003261	hsa-miR-593*	30835	CD209	uc002mht.2	NM_021155	cgacucguUACGGACCGACC-ACGGa	:| |:|| :||| ||||	acuccuguGUCCUUGCUUGGCUGCCu	2	18	2995	3020	[hg19:19:7804905-7804930:-]	0.5453	121	0	-24.77	-0.1139
MIMAT0003261	hsa-miR-593*	2027	ENO3	uc002gab.3	NM_053013	cgacucguuacggaccGACCACGGa	||||||||	cuuccugaaauaaacaCUGGUGCCa	2	10	53	77	[hg19:17:4860395-4860419:+]	0.5843	145	7	-19.29	-0.8642
MIMAT0003261	hsa-miR-593*	65975	STK33	uc001mgj.1	NM_030906	cgacucguuacggaccgaCCACGGa	||||||	gccaaauauaguaauggaGGUGCCa	2	8	369	393	[hg19:11:8413664-8413688:-]	0.6308	120	6	-16.89	-0.1231
MIMAT0003261	hsa-miR-593*	5129	CDK18	uc001hcq.2	NM_212502	cgaCUCGUUACGGAC--CGACCACGGa	|||: | |||| ||||||||	gcaGAGUCA-CCCUGACACUGGUGCCa	2	23	938	963	[hg19:1:205501444-205501469:+]	0.5574	155	7	-25.56	-0.158
MIMAT0003261	hsa-miR-593*	11143	MYST2	uc002ipm.2	NM_007067	cgacuCGUUAC--GGACCGAC-CACGGa	||| || ::|| ||| |||||	accuuGCACUGAUUUUGUCUGAGUGCCc	2	21	935	962	[hg19:17:47905799-47905826:+]	0.5954	127	0	-20.72	-0.4857
MIMAT0003261	hsa-miR-593*	147339	C18orf25	uc002lbw.2	NM_145055	cgacucguUACGGACCGACCACGga	|| ::| :||||||	uuauauauAUAUUU-UUUGGUGCaa	3	18	3761	3784	[hg19:18:43846842-43846865:+]	0.7997	123	0	-11.11	-0.1781
MIMAT0003261	hsa-miR-593*	203328	SUSD3	uc004atb.2	NM_145006	cgacuCGUUACGGACCGACCACGGa	|||:|| ||||||||||	-ccacGCAGUG--AGGCUGGUGCCc	2	21	1	22	[hg19:9:95847030-95847051:+]	0.5409	165	7	-30.23	-0.236
MIMAT0003261	hsa-miR-593*	9722	NOS1AP	uc001gbv.2	NM_014697	cgACUCGUUACGGA-CCG-AC-CACGGa	||: | || :|| || || |||||	cuUGGCCCAUCUCUCUGCGUGCGUGCCu	2	24	1103	1130	[hg19:1:162338360-162338387:+]	0.5663	121	0	-18.3	-0.1424
MIMAT0003261	hsa-miR-593*	100130093	LOC100130093	uc001hqy.3	NR_024486	cgacucguuACGGAC-CGACCACGGa	|| | | | |||||||	caccccaccUGGCAGUGGUGGUGCCa	2	17	733	758	[hg19:1:227920574-227920599:+]	0.7178	147	7	-24.12	-0.1257
MIMAT0003261	hsa-miR-593*	60677	CELF6	uc002auh.2	NM_052840	cgacucguuacggaccgaCCACGGa	||||||	ugucuguuguauacagugGGUGCCa	2	8	1286	1310	[hg19:15:72577402-72577426:-]	0.7501	120	6	-18.51	-0.114
MIMAT0003261	hsa-miR-593*	9798	KIAA0174	uc002fbl.1	BC000116	cgACUCGUUACGGACCGACCACGGa	| || || ::| :|||||||	ucUCAGAAAAAUUU--UUGGUGCCc	2	24	924	946	[hg19:16:71962640-71962662:+]	0.5472	148	7	-15.8	-0.6822
MIMAT0003261	hsa-miR-593*	23	ABCF1	uc011hlv.1	NM_001025091	cgACUCGUUACGGACC--GACCACGGa	| | | | || | :|||||||	caUUAUCCAGCCCAAGAUUUGGUGCCu	2	24	482	508	[hg19:6_mcf_hap5:1940814-1940840:+]	0.5925	142	7	-19.17	-0.4001
MIMAT0003261	hsa-miR-593*	7078	TIMP3	uc003anb.2	NM_000362	cgACUCGUUACGGACCGACCACGGa	||:| ||| :| ||||||||	ccUGGG-AAU--UU--CUGGUGCCa	2	24	224	243	[hg19:22:33255588-33255607:+]	0.6296	147	7	-22.29	-0.1828
MIMAT0003261	hsa-miR-593*	54908	CCDC99	uc003mae.3	NM_017785	cgacucguuacggaccgaCCACGGa	||||||	ugucuuuaauaagaguacGGUGCCa	2	8	6	30	[hg19:5:169031217-169031241:+]	0.5083	120	6	-14.15	-0.1205
MIMAT0003261	hsa-miR-593*	3299	HSF4	uc010cec.1	AK225152	cgacucguuacGGACCGACCACGGa	:|| ||||||||	aacaccugcccUCUACCUGGUGCCc	2	15	1047	1071	[hg19:16:67201072-67201096:+]	0.6722	150	7	-20.73	-0.2693
MIMAT0003261	hsa-miR-593*	1831	TSC22D3	uc004enh.2	NM_198057	cgacucguuaCGGACCGACCACGGa	|| |||||||||	uuuacaccuaGCACAGCUGGUGCCa	2	16	100	124	[hg19:X:106957625-106957649:-]	0.8061	151	7	-20.95	-0.6591
MIMAT0003261	hsa-miR-593*	56947	MFF	uc002voy.2	NM_020194	cgacucGUUACGG-ACC-GACCACGGa	||| |:| ||| ||||||||	cacuuuCAAAGUCAUGGUCUGGUGCCa	2	20	454	480	[hg19:2:228222287-228222313:+]	0.5482	165	7	-26.18	-0.761
MIMAT0003261	hsa-miR-593*	7576	ZNF28	uc002qac.2	NM_006969	cgacucGUUACGGACCGACCACGGa	||| | :||||||:	gaaauuCAACUAAUUUUUGGUGCUa	2	20	2133	2157	[hg19:19:53300784-53300808:-]	0.506	127	0	-11.17	-0.1003
MIMAT0003261	hsa-miR-593*	6091	ROBO1	uc003dqe.2	NM_002941	cgACUCGUUACGG-ACCGACCACGGa	| | ::|| :: | :||||||:	uaUCAUUGAUUUUAUAAUUGGUGCUa	2	24	1333	1358	[hg19:3:78646705-78646730:-]	0.6374	130	0	-11.36	-0.223
MIMAT0003261	hsa-miR-593*	10645	CAMKK2	uc001tzv.2	NM_006549	cgacucguuacggaccgACCACGGa	|||||||	auaaacagacagcaaaaUGGUGCCa	2	9	2982	3006	[hg19:12:121675496-121675520:-]	0.7152	140	7	-16.27	-1.1673
MIMAT0003261	hsa-miR-593*	160851	DGKH	uc001uyp.2	BC044822	cgacUCGUUAC--GGACCGACCACGGa	| || || ||| :|||||||	ggcaAACAUUGAUCCU-UUUGGUGCCa	2	22	2729	2754	[hg19:13:42772675-42772700:+]	0.794	150	7	-18.57	-0.4023
MIMAT0003261	hsa-miR-593*	160851	DGKH	uc001uyp.2	BC044822	cgacUCG-UUACGGACCGACCACGGa	||| || | : | |||||||	aggaAGCUAAAGAU--GAUGGUGCCa	2	22	2300	2323	[hg19:13:42764623-42764646:+]	0.6414	145	7	-17.16	-0.5497
MIMAT0003261	hsa-miR-593*	10777	ARPP21	uc003cgb.2	NM_016300	cgacucGUUACGGACCG---ACCACGga	|: | ||||: ||||||	uauacaCGUUAGCUGGUUAAUGGUGCau	3	20	150	177	[hg19:3:35835600-35835627:+]	0.7844	126	0	-18.28	-0.2381
MIMAT0003261	hsa-miR-593*	100287413	LOC100287413	uc010rkn.1	AK294973	cgacucguuacggaccgaCCACGGa	||||||	guuaauuucacaacuuugGGUGCCa	2	8	309	333	[hg19:11:58675177-58675201:+]	0.5226	120	6	-13.06	-0.2307
MIMAT0003261	hsa-miR-593*	4338	MOCS2	uc011cqf.1	NM_176806	cgACUCGUUACG-GACCGACCACGga	||| : | | || ||||||	ggUGAUUUCUCCGCUCUGUGGUGCaa	3	24	106	131	[hg19:5:52397942-52397967:-]	0.7364	126	0	-14.99	-0.1043
MIMAT0003261	hsa-miR-593*	4338	MOCS2	uc011cqf.1	NM_176806	cgacucguuacggaccgaCCACGGa	||||||	ugauacuuuaaaagccaaGGUGCCc	2	8	385	409	[hg19:5:52396253-52396277:-]	0.7269	120	6	-14.78	-0.1102
MIMAT0003261	hsa-miR-593*	10531	PITRM1	uc001igr.1	BX649017	cgacucguuacggaccGACCACGGa	||||||||	-------------cuuCUGGUGCCu	2	10	1	12	[hg19:10:3180989-3181000:-]	0.4221	145	7	-18.14	-0.1564
MIMAT0003261	hsa-miR-593*	81839	VANGL1	uc001efw.1	CR609810	cgacUCGUUACGGACCG--ACC-ACGGa	:| :|||| | |: ||| ||||	gaaaGGAGAUGCAUAGUGAUGGCUGCCu	2	22	273	300	[hg19:1:116207166-116207193:+]	0.5369	120	0	-19.46	-0.529
MIMAT0003261	hsa-miR-593*	1305	COL13A1	uc001jql.2	NM_001130103	cgacUCGUUACGGACCGACCACGGa	| :| ||: | ||||||||	auaaAUUAUUGUGU-CCUGGUGCCa	2	22	271	294	[hg19:10:71718728-71718751:+]	0.6545	151	7	-18.78	-0.6892
MIMAT0003261	hsa-miR-593*	56052	ALG1	uc002cym.2	NM_019109	cgacuCGUUACGGACCGAC-CACGGa	| :||| | || || |||||	uagcuGGGAUGACAGG-UGCGUGCCa	2	21	1689	1713	[hg19:16:5136571-5136595:+]	0.5052	122	0	-22.88	-0.1649
MIMAT0003261	hsa-miR-593*	54878	DPP8	uc002aox.2	NM_130434	cgACUCGUUACGGACCGACCACGGa	| || || ::| | |||||||	cuUCAG-AAAAUUUAG-UGGUGCCa	2	24	845	867	[hg19:15:65738355-65738377:-]	0.5855	147	7	-13.14	-0.8941
MIMAT0003261	hsa-miR-593*	54878	DPP8	uc002aox.2	NM_130434	cgACUCGUUACGGACCGACCACGGa	||| ||| || |||||||	ccUGA-AAAUAAAUG--UGGUGCCa	2	24	120	141	[hg19:15:65739081-65739102:-]	0.6264	146	7	-16.95	-0.8292
MIMAT0003261	hsa-miR-593*	5959	RDH5	uc001shk.2	NM_002905	cgacucguuacgGACCGACCACGGa	||| ||||||||	cccacccugguaCUGCCUGGUGCCu	2	14	60	84	[hg19:12:56118389-56118413:+]	0.5888	157	7	-26.17	-0.1416
MIMAT0003261	hsa-miR-593*	255919	TMEM188	uc002eft.2	NM_153261	cgaCUCGUUACGGACC--GACCACGGa	|| :|| |:||| |||||||	ccaGAAUAA--CUUGGGAGUGGUGCCa	2	23	1155	1179	[hg19:16:50070524-50070548:+]	0.6459	150	7	-20	-0.6131
MIMAT0003261	hsa-miR-593*	8859	STK19	uc011ghy.1	AK307198	cgacUCGUUACGGACC--GACC-ACGGa	||| : ||:| | :||| ||||	guccAGCUGGGCUUCGACUUGGAUGCCc	2	22	244	271	[hg19:6_dbb_hap3:3232294-3232321:+]	0.7211	120	0	-24.17	-0.8465
MIMAT0003261	hsa-miR-593*	83605	CCM2	uc003tmq.2	CR621631	cgACUCGUUACG-GACCGACC-ACGGa	||| :||| : | |||| ||||	ugUGAAUAAUUUAAUCUCUGGUUGCCa	2	24	1806	1832	[hg19:7:45116039-45116065:+]	0.5843	122	0	-16.03	-0.554
MIMAT0003261	hsa-miR-593*	84253	GARNL3	uc011mae.1	NM_032293	cgacucguuacggaccgaCCACGGa	||||||	guucccucuccaauguccGGUGCCa	2	8	142	166	[hg19:9:130155675-130155699:+]	0.698	120	6	-18.42	-0.1031
MIMAT0003261	hsa-miR-593*	51428	DDX41	uc003mho.2	NM_016222	cgACUCGUUACGGACC--GACC-ACGGa	||:|| | | |||| |||| ||||	gaUGGGCCA-GGCUGGUCCUGGCUGCCu	2	24	111	137	[hg19:5:176938655-176938681:-]	0.5266	132	0	-27.61	-0.2537
MIMAT0003261	hsa-miR-593*	728116	ZBTB8B	uc001bvl.3	NM_001145720	cgacucguuACGGACCGACCACGGa	| ::|| |||||||	cagauaaccUUUUUGUGUGGUGCCc	2	17	174	198	[hg19:1:32951193-32951217:+]	0.594	148	7	-16	-0.1335
MIMAT0003261	hsa-miR-593*	728116	ZBTB8B	uc001bvl.3	NM_001145720	cgacucGUUACG-GACCGACC-ACGGa	||| | |||| ||| ||||	aacuucCAAGCCGCUGGGUGGUUGCCa	2	20	1153	1179	[hg19:1:32952172-32952198:+]	0.5139	126	0	-22.02	-0.1306
MIMAT0003261	hsa-miR-593*	5888	RAD51	uc001zmi.3	NM_002875	cgACUCGUUACGGACCG-ACCACGGa	||| || ::|| | |||||||	uaUGAAGUAUCUUUGACAUGGUGCCu	2	24	253	278	[hg19:15:41023629-41023654:+]	0.531	158	7	-21.72	-0.4776
MIMAT0003261	hsa-miR-593*	57584	ARHGAP21	uc001isb.2	NM_020824	cgacucguuacggaccgaCCACGGa	||||||	aauacaguugguuuuuagGGUGCCa	2	8	349	373	[hg19:10:24872968-24872992:-]	0.6692	120	6	-17.31	-0.4551
MIMAT0003261	hsa-miR-593*	2299	FOXI1	uc003mai.3	NM_012188	cgacuCGUUA-CGGACCGACCACGGa	||||| | ||||||||	acuuuGCAAUAGAAAUACUGGUGCCu	2	21	196	221	[hg19:5:169535811-169535836:+]	0.5431	151	7	-25.88	-0.3617
MIMAT0003261	hsa-miR-593*	9253	NUMBL	uc002oon.2	NM_004756	cgacucguuacggaccgACCACGGa	|||||||	auaaaggaagaauauaaUGGUGCCc	2	9	761	785	[hg19:19:41172588-41172612:-]	0.8143	140	7	-15.36	-0.6383
MIMAT0003261	hsa-miR-593*	285590	SH3PXD2B	uc003mbs.1	AK128871	cgAC-UCGUUACGGACCGAC-CACGGa	|| || || ||||||| |||||	ggUGAAGGAA--ACUGGCUGAGUGCCa	2	24	178	202	[hg19:5:171808834-171808858:-]	0.4959	131	0	-26.32	-0.2808
MIMAT0003261	hsa-miR-593*	168667	BMPER	uc011kap.1	NM_133468	cgacucgUUACGGACCGACC-ACGGa	| || :||||||| ||||	uuccaaaAUUGAUUGGCUGGUUGCCa	2	19	590	615	[hg19:7:34193475-34193500:+]	0.6405	134	0	-22.38	-1.084
MIMAT0003261	hsa-miR-593*	168667	BMPER	uc011kap.1	NM_133468	cgacUCGUUACGGACCGACC-ACGGa	| :|| | || |||| ||||	ugaaAUUAAAGGGUGUCUGGAUGCCa	2	22	744	769	[hg19:7:34193629-34193654:+]	0.6357	125	0	-19.28	-0.9751
MIMAT0003261	hsa-miR-593*	1281	COL3A1	uc002uqj.1	NM_000090	cgacucgUUACGGACCGACCACGGa	||||:|| ||||||:	auuucaaAAUGUCUCAAUGGUGCUa	2	19	225	249	[hg19:2:189876725-189876749:+]	0.7355	146	0	-18.39	-0.6274
MIMAT0003261	hsa-miR-593*	1281	COL3A1	uc002uqj.1	NM_000090	cgACUCGUUACGGACCG-ACCACGGa	| | :| || || : ||||||:	cuUUAAAGACGCAUGUUAUGGUGCUa	2	24	664	689	[hg19:2:189877164-189877189:+]	0.683	134	0	-15.67	-0.1471
MIMAT0003261	hsa-miR-593*	342096	GOLGA6A	uc002axa.1	NM_001038640	cgACUCGUUACGGAC-CGACCACGGa	|| |: ::|| ||||||||	agUGUGUUUCAUUUGUUCUGGUGCCa	2	24	747	772	[hg19:15:74362479-74362504:-]	0.5022	146	7	-19.36	-0.5877
MIMAT0003261	hsa-miR-593*	212	ALAS2	uc004dua.3	NM_000032	cgacucguuACGGACCGAC-CACGGa	|||:| |:|| |||||	ccugucuucUGCUUUGUUGUGUGCCu	2	17	59	84	[hg19:X:55035529-55035554:-]	0.6401	128	0	-24.39	-0.7806
MIMAT0003261	hsa-miR-593*	9871	SEC24D	uc003ici.3	NM_014822	cgaCUC-GUUA-CGGACCGACCACGGa	||| :||| ||| :|||||||	aagGAGAUAAUCUCCUUCUUGGUGCCu	2	23	34	60	[hg19:4:119644610-119644636:-]	0.6145	160	7	-25.57	-0.7986
MIMAT0003261	hsa-miR-593*	130752	MDH1B	uc002vbs.2	NM_001039845	cgACUCGUUACGGACCGACCACGGa	| || | | ::| |||||:|	ucUUAGAACUAUUU---UGGUGUCa	2	24	223	244	[hg19:2:207602963-207602984:-]	0.5289	127	0	-13.7	-0.1078
MIMAT0003261	hsa-miR-593*	9839	ZEB2	uc002tvw.2	BC060819	cgacucgUUACG-GACCG-ACCACGGa	|:||| ||| : |||||||	uucuaaaAGUGCUCUGAUGUGGUGCCu	2	19	2034	2060	[hg19:2:145185220-145185246:-]	0.7253	156	7	-25.3	-0.5071
MIMAT0003261	hsa-miR-593*	9839	ZEB2	uc002tvw.2	BC060819	cgacucguuacggaccgACCACGGa	|||||||	uuaucaccuguaguuaaUGGUGCCu	2	9	1819	1843	[hg19:2:145185437-145185461:-]	0.7133	140	7	-20.58	-0.6742
MIMAT0003261	hsa-miR-593*	80194	TMEM134	uc010rpt.1	AK296988	cgACUCGUUACGGACCGACC-ACGGa	|||| :| || ||||| ||||	ccUGAG-GAGGC--AGCUGGCUGCCa	2	24	89	111	[hg19:11:67234658-67234680:-]	0.5126	122	0	-26.03	-0.4053
MIMAT0003261	hsa-miR-593*	80177	MYCT1	uc003qpc.3	NM_025107	cgACUCGU-UACGGACCGACC-ACGGa	||:||| |||:||| ||| ||||	agUGGGCAGAUGUCUG--UGGCUGCCc	2	24	1484	1508	[hg19:6:153044872-153044896:+]	0.5635	139	0	-27.4	-0.3461
MIMAT0003261	hsa-miR-593*	644919	LOC644919	uc001wvl.1	BX248273	cgACUCGUUACGGACCG--ACCACGGa	||: |:| | | : |||||||	acUGGAAAGUCCAAGAUCAUGGUGCCu	2	24	304	330	[hg19:14:41443553-41443579:+]	0.5011	142	7	-25.15	-0.3201
MIMAT0003261	hsa-miR-593*	712	C1QA	uc001bfy.2	NM_015991	cgACUCGUUACGGACC-GACC-ACGGa	|||| |: || || |||| ||||	ucUGAG-AGCCCCAGGACUGGCUGCCc	2	24	102	127	[hg19:1:22966002-22966027:+]	0.4755	128	0	-26.92	-0.1237
MIMAT0003261	hsa-miR-593*	11186	RASSF1	uc003dad.1	NM_170714	cgacUCGUUACGGACCGAC-CACGGa	:|||: ||| | || |||||	agcaGGCAGCGCCAAG-UGCGUGCCg	2	22	30	54	[hg19:3:50367958-50367982:-]	0.6071	123	0	-20.88	-0.1324
MIMAT0003261	hsa-miR-593*	10576	CCT2	uc001svb.1	NM_006431	cgACUCGUUACG-GACCGACCACGGa	|| | ||| : :| : ||||||	acUGUGGAAUCUGUUUAUCGGUGCCc	2	24	75	100	[hg19:12:69995180-69995205:+]	0.5392	122	6	-20.06	-0.1462
MIMAT0003261	hsa-miR-593*	26018	LRIG1	uc003dmx.2	NM_015541	cgaCUCGUUACGGACCGACCACGGa	|:| ||| :| ||||||||	gugGGGAAAUAGUU--CUGGUGCCu	2	23	352	374	[hg19:3:66430313-66430335:-]	0.5842	155	7	-22.19	-0.3103
MIMAT0003261	hsa-miR-593*	54471	SMCR7L	uc003axx.2	NM_019008	cgacUCGUUACGGACCGAC-CACGGa	|| :|| ::|| || |||||	aucuAGAGAUUUUUGUGUGUGUGCCa	2	22	2845	2870	[hg19:22:39913173-39913198:+]	0.5396	125	0	-16.65	-0.3447
MIMAT0003261	hsa-miR-593*	93986	FOXP2	uc003vgz.2	NM_148898	cgACUCGUUACGGACCGACCACGGa	| ||: | : | |:|||||||	caUUAGUUUUUUAU-GUUGGUGCCa	2	24	550	573	[hg19:7:114330531-114330554:+]	0.7733	149	7	-16.77	-1.28
MIMAT0003261	hsa-miR-593*	23131	GPATCH8	uc002igw.1	NM_001002909	cgACUCGUUACGGACCGACC-ACGGa	||||| || |: |||| ||||	auUGAGCCAUACU---CUGGCUGCCu	2	24	2085	2107	[hg19:17:42472829-42472851:-]	0.6952	127	0	-25.02	-0.3868
MIMAT0003261	hsa-miR-593*	9557	CHD1L	uc009wjg.2	BC053354	cgacucGUUACGGACCGACCACGGa	||| | | |||||||||	ccuccuCAA-GAC-AGCUGGUGCCu	2	20	2547	2569	[hg19:1:146767165-146767187:+]	0.6561	151	7	-22.1	-0.2059
MIMAT0003261	hsa-miR-593*	6583	SLC22A4	uc010jdq.1	AK310818	cgacucguuacGGACCGACCACGGa	|| ||||||||	guucuuggacuCCCAUCUGGUGCCa	2	15	597	621	[hg19:5:131656698-131656722:+]	0.4469	146	7	-20.4	-0.2303
MIMAT0003261	hsa-miR-593*	1291	COL6A1	uc002zhu.1	NM_001848	cgACUCGUUACGGACCGACCACGGa	|||| |: ||| |||||||	caUGAG-AGCCCCU---UGGUGCCa	2	24	839	859	[hg19:21:47424766-47424786:+]	0.5255	149	7	-22.86	-0.2657
MIMAT0003261	hsa-miR-593*	51111	SUV420H1	uc001onm.1	NM_017635	cgacuCGUUACGGACCGACCACGGa	|||| | || :||||||:	ucuuuGCAA-GAAUGAUUGGUGCUu	2	21	744	767	[hg19:11:67924388-67924411:-]	0.8263	142	0	-23.39	-0.3153
MIMAT0003261	hsa-miR-593*	5066	PAM	uc003knt.2	NM_000919	cgacucGUUACGGACCG--ACCACGGa	||:||:|| | |||||||	cauugcCAGUGUCUUUCUUUGGUGCCu	2	20	361	387	[hg19:5:102365130-102365156:+]	0.7058	158	7	-28.21	-1.1232
MIMAT0003261	hsa-miR-593*	85413	SLC22A16	uc003pug.2	BC012014	cgACUCGUUACGGACCGACCACGGa	|| :: | :| | |||||||	guUGUUUGCUUUCAAGAUGGUGCCu	2	24	616	640	[hg19:6:110777097-110777121:-]	0.5171	147	7	-21.02	-0.6738
MIMAT0003261	hsa-miR-593*	9924	PAN2	uc001skx.2	NM_001127460	cgacucguuacggacCGACCACGGa	| ||||||:	gggucuagggucacaGAUGGUGCUa	2	11	116	140	[hg19:12:56711253-56711277:-]	0.6968	126	0	-14.54	-0.1277
MIMAT0003261	hsa-miR-593*	40	ACCN1	uc002hhu.2	NM_001094	cgACUCGUUACGGAC-CG-------ACCACGGa	||:| :| ||||| |: |||||||	ggUGGGGGACGCCUGUGUUCACCCAUGGUGCCc	2	24	617	649	[hg19:17:31340334-31340366:-]	0.5664	145	7	-26.94	-0.2569
MIMAT0003261	hsa-miR-593*	100133612	LOC100133612	uc001alh.3	BC062787	cgACUCGUUACGGACCGACCACGGa	| :|:::| : | ||||||||	acUUGGUGGU-UAUUCCUGGUGCCg	2	24	349	372	[hg19:1:3833171-3833194:+]	0.5273	149	7	-21.02	-0.1257
MIMAT0003261	hsa-miR-593*	387129	NPSR1	uc010kww.1	AY310328	cgacuCGU-UAC--GGAC-C-GACCACGGa	||| :|| |||| | ||||||||	gugcuGCAGGUGGCCCUGUGCCUGGUGCCa	2	21	14	43	[hg19:7:34917810-34917839:+]	0.5842	156	7	-29.78	-0.2307
MIMAT0003261	hsa-miR-593*	122060	SLAIN1	uc001vkk.1	NM_001040153	cgacUCGUUACGG-ACCGACCACGGa	|| ||| :: | :| |||||	uuacAGGAAUUUUAUUUUUUGUGCCu	2	22	449	474	[hg19:13:78337804-78337829:+]	0.7316	120	0	-11.29	-0.1067
MIMAT0003261	hsa-miR-593*	283521	FLJ37307	uc010tgq.1	NR_027047	cgacUCGUUACGGAC-CGAC-CACGGa	|| || | ||| |||| |||||	gucuAGGAAGGGCUGAGCUGCGUGCCc	2	22	2555	2581	[hg19:13:52388306-52388332:-]	0.562	136	0	-25.14	-0.2231
MIMAT0003261	hsa-miR-593*	57475	PLEKHH1	uc001xjl.1	NM_020715	cgAC-UCGUUACGGACCGA-CCACGGa	|| ||| | || || ||||||	ugUGAAGCCUUUACUCUCUAGGUGCCu	2	24	137	163	[hg19:14:68054089-68054115:+]	0.5931	122	6	-19.73	-0.6967
MIMAT0003261	hsa-miR-593*	27154	BRPF3	uc003olv.3	NM_015695	cgacUCGUUACGGACCGAC-CACGGa	:|||: |||| |||| |||||	uccuGGCAG-GCCU-GCUGUGUGCCa	2	22	175	198	[hg19:6:36198561-36198584:+]	0.6555	133	0	-30.98	-0.3108
MIMAT0003261	hsa-miR-593*	9547	CXCL14	uc003lay.2	NM_004887	cgACUCGUUACGGACCGACC-ACGGa	|||| || | | :||| ||||	ucUGAGGAACUCAAGUUUGGUUGCCa	2	24	564	589	[hg19:5:134906954-134906979:-]	0.5883	127	0	-20.96	-0.8169
MIMAT0003261	hsa-miR-593*	9807	IP6K1	uc003cxm.1	NM_153273	cgACUCGUUACGGACCGACC-ACGGa	| || : | ||| | ||| ||||	cuUAAGGGCU-CCUUGAUGGAUGCCa	2	24	1619	1643	[hg19:3:49762912-49762936:-]	0.5371	121	0	-18.19	-0.1498
MIMAT0003261	hsa-miR-593*	85002	FAM86B1	uc010lse.2	NM_001083537	cgacucguuacggaccGACCACGGa	:|||||||	ucccacuuucccacacUUGGUGCCc	2	10	1254	1278	[hg19:8:12039837-12039861:-]	0.5034	141	7	-15.23	-0.1068
MIMAT0003261	hsa-miR-593*	375484	C5orf25	uc003mdr.3	BC066980	cgacUCGUUA-CGGACCGAC-CACGGa	| |||| ||| :|| |||||	gaacACCAAUCAGCUGAUUGUGUGCCa	2	22	868	894	[hg19:5:175749414-175749428,175751632-175751643:+]	0.6964	124	0	-17.36	-0.5337
MIMAT0003261	hsa-miR-593*	5908	RAP1B	uc001suc.2	NM_001010942	cgacucguuacggaccgACCACGga	||||||	aaaagccuuaauuaaagUGGUGCaa	3	9	1184	1208	[hg19:12:69054213-69054237:+]	0.8262	120	0	-13.11	-0.5191
MIMAT0003261	hsa-miR-593*	1317	SLC31A1	uc004bgu.2	NM_001859	cgACUCGUUACGGA-CCGACC-ACGGa	| || :|| |:| | |||| ||||	uuUCAGAGAUUCUUAGACUGGCUGCCa	2	24	2812	2838	[hg19:9:116025565-116025591:+]	0.5913	130	0	-16.97	-0.3056
MIMAT0003261	hsa-miR-593*	83886	PRSS27	uc002crf.2	NM_031948	cgacucgUUACGGACCGAC-CACGGa	|| || | ||| |||||	ccaauaaAAACCCAGCCUGUGUGCC-	2	19	173	197	[hg19:16:2762424-2762448:-]	0.4979	122	0	-15.19	-0.4129
MIMAT0003261	hsa-miR-593*	7786	MAP3K12	uc001sdm.1	NM_006301	cgacucguuacggaccGACCACGGa	||||||||	agucccugcuuuuaucCUGGUGCCu	2	10	595	619	[hg19:12:53874347-53874371:-]	0.6981	145	7	-21.77	-0.6255
MIMAT0003261	hsa-miR-593*	6701	SPRR2B	uc001fbg.2	NM_001017418	cgacUCGUUACGGAC--CGAC-CACGGa	|| || ||| |||| |||||	cagcAGAAAGAGCUGCAGCUGUGUGCCu	2	22	246	273	[hg19:1:153042824-153042851:-]	0.5177	124	0	-25.21	-0.1436
MIMAT0003261	hsa-miR-593*	88455	ANKRD13A	uc009zvl.1	AK308923	cgacucguuacggaccgACCACGGa	|||||||	ugucgcaucuggaaaagUGGUGCCa	2	9	474	498	[hg19:12:110456185-110456209:+]	0.779	140	7	-21.38	-0.9468
MIMAT0003261	hsa-miR-593*	88455	ANKRD13A	uc009zvl.1	AK308923	cgACUCGUUACG-GACCGA-CCACGGa	||:| ||| | | ||| ||||||	aaUGGG-AAUUCACCAGCUGGGUGCCc	2	24	418	443	[hg19:12:110454218-110454238,110456150-110456154:+]	0.7595	128	6	-20.81	-0.6995
MIMAT0003261	hsa-miR-593*	56990	CDC42SE2	uc003kvj.2	NM_001038702	cgACU-CGUUACGGAC-CGACCACGGa	||| |:|: || || |||||||	caUGAUGUAG-GCAUGAAGUGGUGCCa	2	24	2408	2433	[hg19:5:130730001-130730026:+]	0.5382	151	7	-19.76	-0.1386
MIMAT0003261	hsa-miR-593*	3105	HLA-A	uc011fuu.1	CR590761	cgACUCGUUACGG-ACCGACCACGGa	||:||: ||: ||| |||||||	agUGGGCG--GCUGUGG-UGGUGCCu	2	24	181	203	[hg19:6_dbb_hap3:1205462-1205484:+]	0.6393	157	7	-29.59	-0.1344
MIMAT0003261	hsa-miR-593*	23567	ZNF346	uc003mfi.2	NM_012279	cgACUCGUUACGGACCGAC-CACGGa	|| |: :|||:| || |||||	uaUGUGU-GUGCUUCUGUGUGUGCCu	2	24	1290	1314	[hg19:5:176492890-176492914:+]	0.5741	121	0	-17.84	-0.2803
MIMAT0003261	hsa-miR-593*	339122	RAB43	uc010hsy.1	CR596493	cgACUCGU--UACGGACCGAC-CACGGa	|||||| ||| | ||| |||||	gcUGAGCACUAUGACAUCCUGUGUGCCa	2	24	74	101	[hg19:3:128810103-128810130:-]	0.6567	134	0	-27.08	-0.252
MIMAT0003261	hsa-miR-593*	11255	HRH3	uc002ycf.2	NM_007232	cgaCUCGUUACGGACCGACCACGGa	| |:| | ::| :||||||:	aaaGUGUAUUUUUUUAUUGGUGCUg	2	23	1021	1045	[hg19:20:60790017-60790041:-]	0.5653	138	0	-13.3	-0.3091
MIMAT0003261	hsa-miR-593*	64766	S100PBP	uc001bwc.2	NM_022753	cgacucguuacggaCCGACCACGGa	| :|||||||	auuaugaaacugaaGUUUGGUGCCu	2	12	2736	2760	[hg19:1:33324375-33324399:+]	0.7027	143	7	-20.95	-0.7608
MIMAT0003261	hsa-miR-593*	138199	C9orf41	uc004ajq.2	NM_152420	cgacucguuacggaccgACCACGGa	|||||||	acacaaccucaaaucagUGGUGCCu	2	9	89	113	[hg19:9:77598570-77598594:-]	0.7598	140	7	-16.33	-1.142
MIMAT0003261	hsa-miR-593*	23170	TTLL12	uc003bdp.2	AK123789	cgACUCGUUACGGACCGACC-ACGGa	||: | | ||| || ||| ||||	ucUGGACCA-GCCCGG-UGGCUGCCa	2	24	131	154	[hg19:22:43564033-43564056:-]	0.6751	123	0	-21.82	-0.1376
MIMAT0003261	hsa-miR-593*	79958	DENND1C	uc002mfe.2	NM_024898	cgACUCGUUACGGACCGACCACGGa	||: ||| :|| ||||||||	ccUGGUGAAUUUCU--CUGGUGCCc	2	24	71	93	[hg19:19:6467422-6467444:-]	0.51	160	7	-23.65	-0.423
MIMAT0003261	hsa-miR-593*	165055	CCDC138	uc002teo.1	BC050579	cgacucGUUACGGACCGACCACGGa	:|:| : || ||||||:	uuaauaUAGUAUAUG--UGGUGCUu	2	20	139	161	[hg19:2:109492723-109492745:+]	0.5124	128	0	-13.13	-0.1285
MIMAT0003261	hsa-miR-593*	1788	DNMT3A	uc002rgc.2	NM_022552	cgacucguuacggaccgACCACGGa	||||||:	acaacccgacuucauaaUGGUGCUu	2	9	845	869	[hg19:2:25456279-25456303:-]	0.7897	124	0	-13.77	-0.1103
MIMAT0003261	hsa-miR-593*	7027	TFDP1	uc001vtv.2	BC036601	cgACUCGUUACGGACCGACCACGGa	||:|:::|| : || |||||||	guUGGGUGGUGAUGGGGUGGUGCCu	2	24	329	353	[hg19:13:114240385-114240409:+]	0.5128	171	7	-33.66	-0.15
MIMAT0003261	hsa-miR-593*	79934	ADCK4	uc002oos.2	AK022291	cgacUCGU-UACGGACCGAC-CACGGa	:||| ||| |||| || |||||	cgcuGGCAGAUG-CUGG-UGAGUGCCc	2	22	204	228	[hg19:19:41210991-41211015:-]	0.6586	128	0	-29.05	-0.1125
MIMAT0003261	hsa-miR-593*	10152	ABI2	uc002uzz.2	NM_005759	cgacUCGUUACGGACCGAC-CACGGa	||:|||| :| :|| |||||	ugccAGUAAUG-UUCCUUGUGUGCCa	2	22	4682	4706	[hg19:2:204296757-204296781:+]	0.632	127	0	-19.53	-0.3401
MIMAT0003261	hsa-miR-593*	1278	COL1A2	uc010lfh.1	S41099	cgacucguuacggaccGACCACGGa	||||||||	ggcauuaggggugaacCUGGUGCCc	2	10	46	70	[hg19:7:94035030-94035038,94037159-94037174:+]	0.7618	145	7	-22.09	-0.2372
MIMAT0003261	hsa-miR-593*	283149	BCL9L	uc001pug.2	NM_182557	cgACUCGUUACGGACCGACCACGGa	||| | ||::| : ||||||	auUGACC--UGUUUUAUAGGUGCCu	2	24	2229	2251	[hg19:11:118766873-118766895:-]	0.6683	124	6	-18.65	-0.1613
MIMAT0003261	hsa-miR-593*	400966	RGPD1	uc010fgv.2	NM_001024457	cgacUCGUUAC-GGACCG-ACCACGGa	| | ||| :|| : |||||||	aagcAACCAUGUUCUACUAUGGUGCCa	2	22	2	28	[hg19:2:87239672-87239698:+]	0.5941	147	7	-19.41	-1.2589
MIMAT0003261	hsa-miR-593*	400966	RGPD1	uc010fgv.2	NM_001024457	cgACUCGUUACGGACC---GACCA-CGGa	|||| || || ||| :|||| |||	cuUGAG-AA-GCAUGGAUUUUGGUAGCCa	2	24	348	374	[hg19:2:87240018-87240044:+]	0.5388	122	0	-20.54	-0.3321
MIMAT0003261	hsa-miR-593*	57121	LPAR5	uc009zer.2	NM_001142961	cgACUCGUUACGGA-CCG---ACC-ACGGa	||| : ||:|| ||| ||| ||||	gcUGACUUCUGUCUAGGCUCAUGGAUGCCa	2	24	429	458	[hg19:12:6728838-6728867:-]	0.4487	121	0	-25.12	-0.1445
MIMAT0003261	hsa-miR-593*	51564	HDAC7	uc010slo.1	NM_015401	cgacuCGUUACGGACCG----ACCACGGa	|:: | |||| : |||||||	guccuGUGCUUCCUGAUCCAAUGGUGCCa	2	21	679	707	[hg19:12:48176917-48176945:-]	0.5666	143	7	-23.81	-0.959
MIMAT0003261	hsa-miR-593*	1263	PLK3	uc001cmo.2	CR607047	cgacucguuACGGACCGACCACGGa	| ||| :|||||||	ccuucccccUUCCU--UUGGUGCCu	2	17	1553	1575	[hg19:1:45271410-45271432:+]	0.5723	145	7	-19.48	-0.2523
MIMAT0003261	hsa-miR-593*	11283	CYP4F8	uc010xoi.1	AK300478	cgACUCGUUACGGACCGACC-ACGGa	|| || |||| :||| ||||	cuUGCCCACAGCCU--UUGGCUGCCg	2	24	1219	1242	[hg19:19:15730416-15730439:+]	0.4812	120	0	-17.23	-0.1095
MIMAT0003261	hsa-miR-593*	100132832	LOC100132832	uc003ufy.2	NR_028058	cgaCUCGUUACGGAC---CGACCACGGa	|| | |:||| |||||||||	guaGAAAACAGUCUGGAUGCUGGUGCCa	2	23	574	601	[hg19:7:76669370-76669397:+]	0.6042	157	7	-25.27	-0.3261
MIMAT0003261	hsa-miR-593*	27034	ACAD8	uc001qhk.2	NM_014384	cgAC-UC-GUUACGGACCGACCACGGa	|| || ||:|| :|| |||||||	acUGCAGUCAGUG-UUGAGUGGUGCCa	2	24	35	60	[hg19:11:134134889-134134914:+]	0.4462	159	7	-27.11	-0.1704
MIMAT0003261	hsa-miR-593*	64081	PBLD	uc001jns.1	NM_022129	cgacucgUUA--CGGACCG-ACCACGGa	||| ||: ||: |||||||	auacaaaAAUUAGCUGGGUGUGGUGCCa	2	19	255	282	[hg19:10:70043652-70043679:-]	0.5054	152	7	-20.64	-0.3414
MIMAT0003261	hsa-miR-593*	56648	EIF5A2	uc003fhd.2	NM_020390	cgacUCGUUA---CGGACCGACCACGGa	||:| | |:|| |:|||||||	uaaaAGUAUUGUAGUCU-GUUGGUGCCu	2	22	3135	3161	[hg19:3:170607988-170608014:-]	0.6585	154	7	-24.68	-0.2096
MIMAT0003261	hsa-miR-593*	2065	ERBB3	uc001sjh.2	NM_001982	cgACUCGUUACGGACCGACCACGGa	|| || | :|| ||||||	caUGUGCUCUUAUUGUAAGGUGCCa	2	24	998	1022	[hg19:12:56496837-56496861:+]	0.574	123	6	-16.42	-0.1228
MIMAT0003261	hsa-miR-593*	22978	NT5C2	uc001kwq.2	NM_001134373	cgacucguuacggaccgACCACGGa	|||||||	uaagacccagagcaaaaUGGUGCCu	2	9	2323	2347	[hg19:10:104847082-104847106:-]	0.4692	140	7	-21.28	-0.1964
MIMAT0003261	hsa-miR-593*	166	AES	uc002lwx.1	AK095154	cgaCUCGUUACGGACCGACCA-CGGa	|| ||: | || ||||| |||	ucaGAACAGAGGCUUCCUGGUAGCCa	2	23	929	954	[hg19:19:3054791-3054816:-]	0.5632	130	0	-18.77	-0.1067
MIMAT0003261	hsa-miR-593*	2582	GALE	uc009vqq.1	AK307354	cgacucgUUA--CGGACCG-ACCA-CGGa	||| ||: ||| |||| |||	auacaaaAAUUAGCUGGGCAUGGUAGCCc	2	19	21	49	[hg19:1:24124942-24124970:-]	0.5054	120	0	-20.5	-0.5196
MIMAT0003261	hsa-miR-593*	80194	TMEM134	uc001olu.3	AY007143	cgACUCGUUACGGACCGACC-ACGGa	|||| :| || ||||| ||||	ccUGAG-GAGGC--AGCUGGCUGCCa	2	24	160	182	[hg19:11:67234658-67234680:-]	0.5126	122	0	-26.03	-0.3906
MIMAT0003261	hsa-miR-593*	5178	PEG3	uc010etr.2	NM_001146184	cgACUCGUUACGGACCGACC-ACGGa	||| | | | :|| :||| ||||	ugUGACCCA-GAUUGAUUGGUUGCCa	2	24	760	784	[hg19:19:57324259-57324283:-]	0.5538	125	0	-16.7	-0.2999
MIMAT0003261	hsa-miR-593*	5178	PEG3	uc010etr.2	NM_001146184	cgACUCGUUACGGACCG--ACCA-CGGa	| | || || :|||| |||| |||	ugUUAACAUUG-UUGGCAGUGGUAGCCc	2	24	2056	2082	[hg19:19:57322961-57322987:-]	0.5077	124	0	-18.18	-0.1055
MIMAT0003261	hsa-miR-593*	5775	PTPN4	uc002tmf.1	NM_002830	cgacuCGUUACGGAC-CGACCACGGa	| ||| ::|| | |||||||	uuuauGAAAU-UUUGUGGUGGUGCCa	2	21	255	279	[hg19:2:120734901-120734925:+]	0.6571	153	7	-18.2	-0.9954
MIMAT0003261	hsa-miR-593*	55610	CCDC132	uc003umr.2	AL833112	cgacucGUUAC-GGACCGACCACGGa	||:|| :|| |||||||	aagccuCAGUGAUCU---UGGUGCCa	2	20	182	204	[hg19:7:92869199-92869221:+]	0.6692	146	7	-19.79	-0.3886
MIMAT0003261	hsa-miR-593*	3109	HLA-DMB	uc011gkx.1	AB209577	cgacucguuacggaccGACCACGGa	||||||||	uuagauuucaacuauuCUGGUGCCa	2	10	1825	1849	[hg19:6_dbb_hap3:4185854-4185878:-]	0.5927	145	7	-16.33	-0.1764
MIMAT0003261	hsa-miR-593*	3084	NRG1	uc010lvo.2	NM_001160004	cgaCUCGUUACGGACCGACCACGGa	||| || : | |||||||	aacGAGAAAGAUAUCAAUGGUGCCu	2	23	870	894	[hg19:8:32622114-32622138:+]	0.771	150	7	-21.06	-1.2737
MIMAT0003261	hsa-miR-593*	27040	LAT	uc002dsc.2	NM_001014988	cgACUCGUUACGGACCGAC-CACGGa	||||| :||| | || |||||	guUGAGC-GUGCGUCUGUGUGUGCCu	2	24	270	294	[hg19:16:29001772-29001796:+]	0.4493	129	0	-29.45	-0.1518
MIMAT0003261	hsa-miR-593*	5334	PLCL1	uc010fsp.2	NM_001114661	cgacucguuacggaccgACCACGGa	|||||||	uuuauaaguucacaaaaUGGUGCCc	2	9	78	102	[hg19:2:199011764-199011788:+]	0.6029	140	7	-13.26	-0.5491
MIMAT0003261	hsa-miR-593*	27122	DKK3	uc001mjv.2	NM_015881	cgacucGUUACGGACCG-ACCACGGa	| | || | | |||||||	acuaccCCACACCAGCCUUGGUGCCa	2	20	750	775	[hg19:11:11985236-11985261:-]	0.5383	146	7	-18.02	-0.3021
MIMAT0003261	hsa-miR-593*	1326	MAP3K8	uc001ivi.1	NM_005204	cgaCUCGUUACG-G--ACCGACCACGGa	|:|| ||: | || |||||||	cagGGGCCCUGUACAGUGAAUGGUGCCa	2	23	69	96	[hg19:10:30749834-30749861:+]	0.5712	148	7	-22.62	-0.7858
MIMAT0003261	hsa-miR-593*	79712	GTDC1	uc002tvp.2	NM_001006636	cgacuCGUUACGGACCG-ACCACGGa	|:| || || | |||||||	ccuuuGUACUGGAUGACAUGGUGCCu	2	21	362	387	[hg19:2:144704232-144704257:-]	0.8514	155	7	-23.28	-1.0767
MIMAT0003261	hsa-miR-593*	79712	GTDC1	uc002tvp.2	NM_001006636	cgacucguUACGG-ACCGACCACGGa	|| || | |||||||	acucauguAUCCCAUAUGUGGUGCCa	2	18	306	331	[hg19:2:144704288-144704313:-]	0.9114	144	7	-15.62	-1.2138
MIMAT0003261	hsa-miR-593*	84961	FBXL20	uc002hrt.2	NM_032875	cgACUCGUUACGGACCG-ACCACGGa	| | | || |||| : ||||||	auUUAACCAUUCCUGUUGAGGUGCCc	2	24	243	268	[hg19:17:37417445-37417470:-]	0.6629	130	6	-17.49	-0.1312
MIMAT0003261	hsa-miR-593*	29093	MRPL22	uc003lvy.3	NM_014180	cgACUCGUUACGGACCGACCACGGa	||| :|| ||| || |||||||	ugUGACUAAAGCCAGG-UGGUGCCa	2	24	1822	1845	[hg19:5:154348279-154348302:+]	0.5536	173	7	-24.27	-0.1135
MIMAT0003261	hsa-miR-593*	10317	B3GALT5	uc002yyj.1	NM_033170	cgACUCGUUACGGACCGACCACGGa	||| :|:| || :|||||||	acUGAUUAGUUCCCACUUGGUGCCc	2	24	142	166	[hg19:21:41033561-41033585:+]	0.4395	163	7	-25.79	-0.113
MIMAT0003261	hsa-miR-593*	619207	LOC619207	uc001lng.2	AK127253	cgacucguuacggaccgACCACGGa	|||||||	ugugguuuagagacacaUGGUGCCa	2	9	3834	3858	[hg19:10:135281747-135281771:+]	0.5393	140	7	-14.63	-0.1596
MIMAT0003261	hsa-miR-593*	26610	ELP4	uc001mtc.2	BC012514	cgacucguuacggaccgACCACGGa	|||||||	aacacaggauuauaaaaUGGUGCCg	2	9	204	228	[hg19:11:31805181-31805205:+]	0.646	140	7	-15.1	-1.1776
MIMAT0003261	hsa-miR-593*	5339	PLEC	uc003zaf.1	NM_201380	cgacucguuACGGACCGACCACGGa	| || | |||||||	gugucuuccUCCCAAG-UGGUGCCu	2	17	82	105	[hg19:8:144990240-144990263:-]	0.616	142	7	-17.76	-0.6059
MIMAT0003261	hsa-miR-593*	3340	NDST1	uc003lsk.3	NM_001543	cgacucguuACGGACCGACCACGGa	| ::| :|||||||	uuuguuuuuUUUUUUCUUGGUGCCa	2	17	944	968	[hg19:5:149933838-149933862:+]	0.7255	144	7	-14.64	-0.6849
MIMAT0003261	hsa-miR-593*	5800	PTPRO	uc001rcv.1	NM_030667	cgACUCGUUACGGACCGACCACGGa	|||||||| | | |||||||	ucUGAGCAAU--C--G-UGGUGCCu	2	24	834	853	[hg19:12:15749841-15749860:+]	0.6609	155	7	-27.57	-0.233
MIMAT0003261	hsa-miR-593*	9806	SPOCK2	uc010qjt.1	NM_001134434	cgacucguuACGGAC-CGACCACGGa	| :||| :|||||||	ccaccugucUCUCUGUAUUGGUGCCa	2	17	646	671	[hg19:10:73846035-73846060:-]	0.5728	147	7	-20.41	-0.9377
MIMAT0003261	hsa-miR-593*	8292	COLQ	uc003bzx.2	NM_005677	cgacUCGUUACGGACCGAC-CACGGa	||| ||:| ||| |||||	gcauAGCCUUGUCCUCCUGUGUGCCu	2	22	1026	1051	[hg19:3:15492100-15492125:-]	0.5069	125	0	-23.14	-0.17
MIMAT0003261	hsa-miR-593*	156	ADRBK1	uc009yrn.1	NM_001619	cgacucguuacggaccgACCACGGa	|||||||	ugcguuuuuauaaaaaaUGGUGCCu	2	9	1080	1104	[hg19:11:67054001-67054025:+]	0.6545	140	7	-15.47	-1.2643
MIMAT0003261	hsa-miR-593*	7091	TLE4	uc004alc.2	NM_007005	cgacucguuacggaccgACCACGGa	|||||:|	uagcagaaaaaaaaaaaUGGUGUCu	2	9	1393	1417	[hg19:9:82341452-82341476:+]	0.8407	124	0	-16.42	-0.1371
MIMAT0003261	hsa-miR-593*	55588	MED29	uc010xuw.1	AK298014	cgACUCGUUA-CGGACCGAC-CACGGa	||:| ::| |:|| ||| |||||	gcUGGGAGGUGGUCU--CUGUGUGCCa	2	24	270	294	[hg19:19:39888667-39888691:+]	0.4185	123	0	-25.01	-0.187
MIMAT0003261	hsa-miR-593*	56963	RGMA	uc002bss.1	NM_020211	cgACUCGUUACGG-ACC---GACCACGGa	||| ||| |:: ||| ||||||||	cgUGA-CAAGGUUGUGGUGACUGGUGCCa	2	24	171	198	[hg19:15:93588030-93588057:-]	0.5547	159	7	-23.47	-0.2525
MIMAT0003261	hsa-miR-593*	26119	LDLRAP1	uc009vrw.2	AK309850	cgacUCGUUACGGACCGACCACGGa	| ||| | | ||||||||	ucauAACAAACCAU--CUGGUGCCu	2	22	1732	1754	[hg19:1:25894635-25894657:+]	0.6891	150	7	-21.03	-0.3163
MIMAT0003261	hsa-miR-593*	22841	RAB11FIP2	uc001ldj.1	NM_014904	cgacucguuacggaccgACCACGGa	|||||||	uuuuuuuuuuuuaaacaUGGUGCCa	2	9	1820	1844	[hg19:10:119766665-119766689:-]	0.5588	140	7	-12.68	-0.7429
MIMAT0003261	hsa-miR-593*	84276	NICN1	uc003cwz.1	NM_032316	cgACUCGUUACGGAC---CGACC-ACGGa	|| | ||||| || ||||| ||||	cuUGUGGAAUGCAUGACUGCUGGCUGCCu	2	24	1875	1903	[hg19:3:49460363-49460391:-]	0.6817	138	0	-26.16	-0.1473
MIMAT0003261	hsa-miR-593*	140690	CTCFL	uc010gjh.1	DQ778121	cgacUCGUUACGGACCGACCACGGa	|| || ||| |||||||	aaguAGGAA-GCC---AUGGUGCCu	2	22	35	55	[hg19:20:56082584-56082604:-]	0.5472	143	7	-23.22	-0.5415
MIMAT0003261	hsa-miR-593*	57412	AS3MT	uc001kwk.2	NM_020682	cgacucGUUACGGACCGACCACGGa	||| |:: ||||||||	cuacuuCAAAGUU---CUGGUGCCa	2	20	871	892	[hg19:10:104661328-104661349:+]	0.5632	147	7	-16.94	-0.7271
MIMAT0003261	hsa-miR-593*	140730	RIMS4	uc002xms.2	NM_182970	cgacUCGUUACGGACCGACCACGGa	:|| || || |||||||	agccGGCCAU--CUCCAUGGUGCCa	2	22	375	397	[hg19:20:43384378-43384400:-]	0.7081	146	7	-20.47	-0.2755
MIMAT0003261	hsa-miR-593*	55207	ARL8B	uc003bqg.2	NM_018184	cgACUCGUUA-CGGACCGACCACGGa	| :||| | ::|| ||||||||	cuUUGGCACUCUUUUGACUGGUGCCa	2	24	1035	1060	[hg19:3:5221433-5221458:+]	0.694	162	7	-23.43	-0.7219
MIMAT0003261	hsa-miR-593*	79969	C6orf134	uc011fxm.1	AK297661	cgACUCGUUACGGACCG-AC-CACGGa	||:| |: ||||| || |||||	agUGGGAAGCCACUGGCUUGUGUGCCa	2	24	345	371	[hg19:6_dbb_hap3:1904774-1904800:+]	0.5451	130	0	-24.96	-0.1566
MIMAT0003261	hsa-miR-593*	55893	ZNF395	uc003xgr.2	NM_018660	cgacucguuACGGACC--GACCACGGa	| |: || :|||||||	cuuuguucuUACUAGGUUUUGGUGCCa	2	17	2204	2230	[hg19:8:28204006-28204032:-]	0.4872	143	7	-17.51	-0.3095
MIMAT0003261	hsa-miR-593*	51050	PI15	uc003yal.2	NM_015886	cgacucGUUACGG-ACCG-----ACCACGGa	:||| |: |||| |||||||	auuaccUAAUUCUGUGGCAAAAAUGGUGCCu	2	20	5610	5640	[hg19:8:75767098-75767128:+]	0.6012	145	7	-21.87	-0.1018
MIMAT0003261	hsa-miR-593*	51050	PI15	uc003yal.2	NM_015886	cgacucguuacggaccGACCACGGa	:|||||||	uuugacaaacagaauuUUGGUGCCa	2	10	5431	5455	[hg19:8:75766919-75766943:+]	0.6194	141	7	-16.84	-0.5332
MIMAT0003261	hsa-miR-593*	9802	DAZAP2	uc010snc.1	NM_001136268	cgacuCGUUACGGACCGACCACGGa	| ::||:|| ||||||||	uuguuGGGGUGUCUUUCUGGUGCCc	2	21	108	132	[hg19:12:51636350-51636374:+]	0.7622	164	7	-30	-0.4902
MIMAT0003261	hsa-miR-593*	9802	DAZAP2	uc010snc.1	NM_001136268	cgACUCGUUACGGAC-CGACCACGGa	| | | | ::|| :|||||||	ccUAACCCAAAUUUGCUUUGGUGCCa	2	24	749	774	[hg19:12:51636991-51637016:+]	0.6541	146	7	-16.73	-1.0337
MIMAT0003261	hsa-miR-593*	7247	TSN	uc010flt.2	AK311410	cgacuCGUUACGGACCGACC-ACGGa	|||: ||:| :||| ||||	gagcuGCAGGGCUU-UUUGGCUGCCg	2	21	260	284	[hg19:2:122513380-122513404:+]	0.7459	122	0	-23.07	-0.1609
MIMAT0003261	hsa-miR-593*	161725	OTUD7A	uc001zfq.2	NM_130901	cgACUCGUU---ACGGACCGACCACGGa	||: ||| | ||| |||||||	uuUGGUCAAACGUUCCU-AAUGGUGCCu	2	24	129	155	[hg19:15:31775342-31775368:-]	0.7008	148	7	-22.34	-0.9609
MIMAT0003261	hsa-miR-593*	1859	DYRK1A	uc002ywi.2	NM_101395	cgacucguuACGGAC-CGACC-ACGGa	| :||| ||||| ||||	cauuuuuuuUUUCUGUGCUGGUUGCCa	2	17	2973	2999	[hg19:21:38887139-38887165:+]	0.6448	123	0	-20.22	-0.4661
MIMAT0003261	hsa-miR-593*	100137047	JMJD7	uc010bcm.1	AK000550	cgACUCGUUACGGACCGAC-CACGGa	|| || |||: ||| |||||	ucUGCGC-AUGUAGCUCUGCGUGCCu	2	24	283	307	[hg19:15:42121480-42121490,42126938-42126951:+]	0.579	121	0	-24.43	-0.3274
MIMAT0003261	hsa-miR-593*	80742	PRR3	uc011iix.1	NM_025263	cgACUCGUUACGGACCGACCACGGa	||||::| || | :|||||||	aaUGAGUGAGGC--GCUUGGUGCCc	2	24	704	726	[hg19:6_qbl_hap6:1823880-1823902:+]	0.6478	164	7	-21.98	-0.1553
MIMAT0003261	hsa-miR-593*	56108	PCDHGA7	uc003lka.1	NM_018920	cgacucGUUACGGACC-GACCACGGa	||| || ||| :|||||||	uuccccCAAAGCAUGGUUUGGUGCCa	2	20	498	523	[hg19:5:140891238-140891263:+]	0.6	166	7	-21.9	-0.4899
MIMAT0003261	hsa-miR-593*	1789	DNMT3B	uc010geh.2	AF129268	cgacucguuacGGACCGACCACGGa	:|| |||||||:	ccuuuuacucuUCUUACUGGUGCUa	2	15	1772	1796	[hg19:20:31396894-31396918:+]	0.6499	134	0	-14.21	-0.1245
MIMAT0003261	hsa-miR-593*	4649	MYO9A	uc002atl.3	NM_006901	cgacUCGUUACGG-ACCGACCACGGa	||| |||: || |||||||	agaaAGC-CUGCUGGGGAUGGUGCCa	2	22	171	195	[hg19:15:72118726-72118750:-]	0.5983	154	7	-23.6	-0.3059
MIMAT0003261	hsa-miR-593*	340390	KIAA1875	uc011lky.1	AK302485	cgaCUCGU--UACGGAC--CGACCACGGa	|:||| || :| | ||||||||	ggaGGGCAACAUCUCAGCACCUGGUGCCg	2	23	357	385	[hg19:8:145166355-145166383:+]	0.6054	152	7	-24.06	-0.1499
MIMAT0003261	hsa-miR-593*	55076	TMEM45A	uc003dtz.1	NM_018004	cgACUCGU-UACGGACCGACCACGga	||| :: |||: | :||||||	aaUGAAUGUAUGUAU-UUUGGUGC--	3	24	401	423	[hg19:3:100296263-100296285:+]	0.6194	132	0	-14.11	-0.2947
MIMAT0003261	hsa-miR-593*	329	BIRC2	uc001pgy.2	NM_001166	cgacucguuacggaccgACCACGGa	|||||||	ggaguucaucagaguuaUGGUGCCg	2	9	361	385	[hg19:11:102249275-102249299:+]	0.5926	140	7	-16.77	-0.6174
MIMAT0003261	hsa-miR-593*	23522	MYST4	uc001jwn.1	NM_012330	cgacucguuacggaccgaCCACGGa	||||||	guuuuuugccuugauuagGGUGCCc	2	8	530	554	[hg19:10:76791334-76791358:+]	0.72	120	6	-18.44	-0.1167
MIMAT0003261	hsa-miR-593*	65264	UBE2Z	uc002ioi.2	NM_023079	cgacucguuACGGACCGACCACGga	| ||| :||||||	uuuuuuguuUUCCUUUUUGGUGCaa	3	17	1878	1902	[hg19:17:47006374-47006398:+]	0.7034	132	0	-16.24	-0.2115
MIMAT0003261	hsa-miR-593*	6992	PPP1R11	uc011fvk.1	BC003144	cgacucguuacggaccGACCACGGa	:|||||||	------------gcauUUGGUGCCg	2	10	1	13	[hg19:6_dbb_hap3:1328656-1328668:+]	0.6629	141	7	-14.25	-0.2689
MIMAT0003261	hsa-miR-593*	9545	RAB3D	uc002mqy.2	NM_004283	cgacucGUUACGGACCG-ACC-ACGGa	|||||:| | | ||| ||||	ccuucaCAAUGUC-GCCGUGGCUGCCa	2	20	142	167	[hg19:19:11435907-11435932:-]	0.4807	124	0	-19.62	-0.1101
MIMAT0003261	hsa-miR-593*	1497	CTNS	uc002fwb.2	NM_004937	cgacUCG-UUACGGACCGA-CCACGGa	||: ||||: | || ||||||	acccAGUAAAUGUGUUACUGGGUGCCc	2	22	1594	1620	[hg19:17:3565257-3565283:+]	0.4769	128	6	-19.3	-0.3601
MIMAT0003261	hsa-miR-593*	129285	KLRAQ1	uc002rwk.2	NM_152994	cgACUC-GUUAC-GGACCGACC-ACGGa	|||| | | | || ||||| ||||	gcUGAGACCACGUCCAUGCUGGCUGCCu	2	24	64	91	[hg19:2:48741947-48741974:+]	0.6228	129	0	-28.72	-0.2669
MIMAT0003261	hsa-miR-593*	7184	HSP90B1	uc001tkb.1	NM_003299	cgACUCGUUACGGAC-CGACC-ACGGa	||:| :| |:|| :||| ||||	uuUGGGAGAGACUUGUUUUGGAUGCCc	2	24	62	88	[hg19:12:104341502-104341528:+]	0.609	122	0	-19.78	-0.6533
MIMAT0003261	hsa-miR-593*	163049	ZNF791	uc002mua.2	NM_153358	cgACUCGUUAC--GG---A-CCGACCA-CGGa	| ||||||| || | ||:|||| |||	agUCAGCAAUGGACCAUAUAGGUUGGUAGCCc	2	24	165	196	[hg19:19:12740239-12740270:+]	0.4701	128	0	-24.57	-0.7977
MIMAT0003261	hsa-miR-593*	55691	FRMD4A	uc001imu.1	AK001072	cgACUCGUUACGGACC--GACCACGGa	|| | ||| :| || ||||||||	guUGUG-AAUUUCAGGAUCUGGUGCCa	2	24	179	204	[hg19:10:13735506-13735531:-]	0.5088	160	7	-21.7	-0.2498
MIMAT0003261	hsa-miR-593*	65217	PCDH15	uc010qhq.1	NM_001142771	cgaCUCGU-UACGGACCGACCACGGa	|:||| |||||| :|||||||	ucaGGGCAGAUGCCU-AUUGGUGCCu	2	23	3358	3382	[hg19:10:55562957-55562981:-]	0.6741	171	7	-33.39	-0.3398
MIMAT0003261	hsa-miR-593*	10295	BCKDK	uc010cah.2	CR608547	cgacUCGUUA-CGGACCGACC-ACGGa	| |||| ||| | ||| ||||	ccgcAUCAAUGGCCAUG-UGGCUGCCc	2	22	998	1023	[hg19:16:31122451-31122476:+]	0.8104	122	0	-18.19	-0.2566
MIMAT0003261	hsa-miR-593*	55093	WDYHV1	uc003yqn.1	NM_018024	cgacucgUUACGG--ACCGACCACGGa	|||||| | ||||||	aaucucaAAUGCCCAUAAAAGGUGCCc	2	19	395	421	[hg19:8:124454050-124454076:+]	0.6336	121	6	-18.6	-0.1707
MIMAT0003261	hsa-miR-593*	9972	NUP153	uc003ncd.1	NM_005124	cgacucguuacggacCGACCACGGa	|||||||||	ucaauuuuaacaacaGCUGGUGCCc	2	11	21	45	[hg19:6:17616283-17616307:-]	0.6112	150	7	-18.76	-0.2633
MIMAT0003261	hsa-miR-593*	89781	HPS4	uc003aci.2	NM_152841	cgacucguuaCGGAC-CGACCACGGa	||:|| :|||||||	uuccaucccaGCUUGAAUUGGUGCCa	2	16	307	332	[hg19:22:26848867-26848892:-]	0.5137	150	7	-20.42	-0.482
MIMAT0003261	hsa-miR-593*	338657	CCDC84	uc010ryl.1	BC144209	cgaCUCGUUACGGACCGACCACGGa	||||:||||: |||||||||	cacGAGCGAUGCU--GCUGGUGCCu	2	23	234	256	[hg19:11:118869197-118869219:+]	0.7003	179	7	-36.87	-0.1257
MIMAT0003261	hsa-miR-593*	338657	CCDC84	uc010ryl.1	BC144209	cgaCUCGUUACGGACCGACC-ACGGa	|| ||:|| | |||||| ||||	cagGACCAGUG-CAGGCUGGCUGCCc	2	23	954	978	[hg19:11:118886081-118886105:+]	0.7763	140	0	-29.64	-0.4457
MIMAT0003261	hsa-miR-593*	92305	TMEM129	uc003gdn.2	NM_001127266	cgacucguUACGGACCG--ACCACGGa	|| |||| | |||||||	gguuucucAU-CCUGUCCUUGGUGCCu	2	18	621	646	[hg19:4:1718261-1718286:-]	0.5082	150	7	-22.96	-0.2896
MIMAT0003261	hsa-miR-593*	58499	ZNF462	uc004bcz.2	NM_021224	cgACU-CGUUACGGACCGACCACGga	||| ||| |:| :||||||	uuUGACGCACAACUU--UUGGUGCgu	3	24	374	397	[hg19:9:109773685-109773708:+]	0.8251	131	0	-17.53	-0.4264
MIMAT0003261	hsa-miR-593*	158381	LOC158381	uc003zwu.2	NR_003581	cgacucGUUACGGACCGACCACGGa	|||| || |||||||	uauucuCAAUACC---AUGGUGCCc	2	20	1103	1124	[hg19:9:35469283-35469304:+]	0.7067	147	7	-18.55	-0.5425
MIMAT0003261	hsa-miR-593*	128178	EDARADD	uc001hxu.1	NM_145861	cgaCUCGUUACGGACCG------ACCACGGa	|: ||||| :|||: |||||||	ccaGGCCAAUGGUUGGUGUGUCAUGGUGCCu	2	23	1595	1625	[hg19:1:236647544-236647574:+]	0.5642	153	7	-28.84	-0.1307
MIMAT0003261	hsa-miR-593*	284361	C19orf63	uc002psl.2	NM_206538	cgacuCGUUACGGACCGAC-CACGGa	||:: |:| |||| |||||	ggccuGCGGGCCUUUGCUGUGUGCCa	2	21	807	832	[hg19:19:50986323-50986348:+]	0.4934	128	0	-25.88	-0.2078
MIMAT0003261	hsa-miR-593*	64284	RAB17	uc002vwz.1	NM_022449	cgaCUCGU-UACGGAC-CGACCACGGa	|: || ||| | | |||||||	gcaGGCCAGAUGGAGGUGGUGGUGCCa	2	23	424	450	[hg19:2:238483212-238483238:-]	0.5331	148	7	-21.63	-0.1459
MIMAT0003261	hsa-miR-593*	9815	GIT2	uc001tps.2	NM_057169	cgacucgUUACGGACCGACCACGGa	:|||::| :|||||||	aaaccuaGAUGUUU-UUUGGUGCCa	2	19	1467	1490	[hg19:12:110369293-110369316:-]	0.5442	152	7	-18.63	-0.7839
MIMAT0003261	hsa-miR-593*	10004	NAALADL1	uc001ocn.2	NM_005468	cgACUCGUUAC-GGACC------GACCACGGa	|||| ||| ||||| :|||||||	ccUGAG--AUGUCCUGGUCUUCCUUGGUGCCa	2	24	56	85	[hg19:11:64812658-64812687:-]	0.4689	150	7	-30.99	-0.2441
MIMAT0003261	hsa-miR-593*	10004	NAALADL1	uc001ocn.2	NM_005468	cgACUCGUUACGGACCGAC-CACGGa	||:|::: | : || || |||||	ggUGGGUGGAGAUGGGAUGCGUGCCa	2	24	259	284	[hg19:11:64812459-64812484:-]	0.4929	127	0	-19.78	-0.3401
MIMAT0003261	hsa-miR-593*	57409	MIF4GD	uc002jnp.2	NM_020679	cgaCUCGUU-ACGGACCGACCACGGa	| |||| | |: :|||||||	uuaGUGCAACUACUACCUUGGUGCCu	2	23	256	281	[hg19:17:73262540-73262565:-]	0.5396	153	7	-21.55	-0.6047
MIMAT0003261	hsa-miR-593*	143162	FRMPD2	uc001jgi.2	NM_001018071	cgacucgUUACGGACCGACC-ACGGa	|:|||:| | ||| ||||	ugcacaaAGUGCUUUGAUGGUUGCCu	2	19	267	292	[hg19:10:49365073-49365098:-]	0.6427	130	0	-20.12	-0.5791
MIMAT0003261	hsa-miR-593*	8859	STK19	uc011jpl.1	NM_032454	cgacUCGUUACGGAC-CGACCACGGa	||::: || | |||||||	ggaaAGUGGAACCAGAAAUGGUGCCa	2	22	263	288	[hg19:6_ssto_hap7:3314491-3314516:+]	0.5501	144	7	-17.03	-0.5549
MIMAT0003261	hsa-miR-593*	55756	INTS9	uc003xha.2	NM_018250	cgacuCGUUACGGACCGACC-ACGGa	|||:| ||| |||| ||||	auccuGCAGUCCCUCACUGGCUGCCc	2	21	28	53	[hg19:8:28625610-28625635:-]	0.4687	136	0	-22.82	-0.1886
MIMAT0003261	hsa-miR-593*	55266	TMEM19	uc009zru.1	BC008596	cgacucGUUACGGACCGAC-CACGGa	| ||| :| ||| |||||	ucuucaCUAUGAUUUACUGUGUGCCa	2	20	2567	2592	[hg19:12:72095748-72095773:+]	0.5951	123	0	-14.67	-0.6254
MIMAT0003261	hsa-miR-593*	100131755	ARMCX4	uc004ehs.2	AK126987	cgacucguuacggaccGACCACGGa	||||||||	aaaugggacacauuaaCUGGUGCCa	2	10	1590	1614	[hg19:X:100753407-100753431:+]	0.5914	145	7	-19.95	-0.1103
MIMAT0003261	hsa-miR-593*	6059	ABCE1	uc003ijy.2	NM_002940	cgacuCGUUACGGA--CCGACCACGGa	| ||| ::| | |||||||	gacucGAAAUCUUUAAAGAUGGUGCCu	2	21	815	841	[hg19:4:146049540-146049566:+]	0.5366	147	7	-16.97	-0.7342
MIMAT0003261	hsa-miR-593*	6992	PPP1R11	uc011ekg.1	AK310593	cgacucguuacggaccGACCACGGa	:|||||||	------------gcauUUGGUGCCg	2	10	1	13	[hg19:6_apd_hap1:1275163-1275175:+]	0.6629	141	7	-14.25	-0.2581
MIMAT0003261	hsa-miR-593*	203197	C9orf91	uc004bjd.3	NM_153045	cgACUCGUUACGGACCGAC-CACGGa	||| || | || ||| |||||	ucUGACCAUUCACUUUCUGUGUGCCa	2	24	2116	2141	[hg19:9:117407709-117407734:+]	0.5919	131	0	-20.97	-0.2333
MIMAT0003261	hsa-miR-593*	116988	AGAP3	uc010lpy.1	BC069236	cgacuCGUUACG-GACCGACCACGGa	|:: ||| ||| |||||||	gaccuGUGCUGCUCUGUAUGGUGCCg	2	21	798	823	[hg19:7:150820672-150820697:+]	0.6225	159	7	-25.85	-0.628
MIMAT0003261	hsa-miR-593*	3860	KRT13	uc002hwv.1	NM_002274	cgacucGUUACGGACCGACCA-CGGa	:||||||| ||||| |||	caccucUAAUGCCU--CUGGUCGCCg	2	20	40	63	[hg19:17:39657533-39657556:-]	0.5288	132	0	-22.61	-0.3579
MIMAT0003261	hsa-miR-593*	286122	C8orf31	uc003yxp.1	NM_173687	cgacuCGUUAC-GGAC-CGACCACGGa	|||:|| ||| | |||||||	aguuuGCAGUGAGCUGAGAUGGUGCCa	2	21	1059	1085	[hg19:8:144135655-144135681:+]	0.5489	162	7	-27.52	-0.2703
MIMAT0003261	hsa-miR-593*	29057	FAM156A	uc004drp.2	CR604137	cgacUCGUUACGGACCGAC-CACGGa	||| :|| : || || |||||	agcaAGCUGUGGUCGGAUGAGUGCCa	2	22	95	120	[hg19:X:52977035-52977060:-]	0.5481	129	0	-20.91	-0.2554
MIMAT0003261	hsa-miR-593*	54212	SNTG1	uc011ldl.1	BC143695	cgacucguUACGGACCGACCACGGa	|| |:| | |||||||	caaacgacAUCCUUUG-UGGUGCCa	2	18	73	96	[hg19:8:51085193-51085195,51306772-51306792:+]	0.6348	151	7	-17.61	-0.3761
MIMAT0003261	hsa-miR-593*	5885	RAD21	uc003yod.2	NM_006265	cgaCUCGU-UACGGAC----CGACCACGga	|| || |||: || :||||||	ucaGAACAGAUGUGUGCAAUAUUGGUGCau	3	23	255	284	[hg19:8:117859455-117859484:-]	0.8207	128	0	-17.55	-0.1096
MIMAT0003261	hsa-miR-593*	8106	PABPN1	uc001wjj.2	AK293633	cgacucguuaCGGACCG-ACCACGGa	|||| |: |||||||	uucucacuggGCCUAGUGUGGUGCCc	2	16	488	513	[hg19:14:23793996-23794021:+]	0.5162	154	7	-24.16	-0.1483
MIMAT0003261	hsa-miR-593*	6595	SMARCA2	uc003zhc.2	NM_003070	cgaCUCGUUACGGACCGACCACGGa	|| ||||: |:||||||:	uucGAAGAAUGUGGUGUUGGUGCUu	2	23	830	854	[hg19:9:2193569-2193593:+]	0.7972	146	0	-21.46	-0.1349
MIMAT0003261	hsa-miR-593*	79054	TRPM8	uc010fyk.2	BC033137	cgACUCGUUACGGACCGACCACGGa	|| |: || | |||||||	uaUGUGUUUCUCCAGAAUGGUGCCu	2	24	1214	1238	[hg19:2:234926119-234926143:+]	0.4908	147	7	-18.94	-0.2062
MIMAT0003261	hsa-miR-593*	79054	TRPM8	uc010fyk.2	BC033137	cgACUCGUUACGGACCGACCA-CGGa	||: ||| ||| |||||| |||	gcUGGUCAA--CCU-GCUGGUCGCCa	2	24	590	612	[hg19:2:234894480-234894502:+]	0.7992	130	0	-27.01	-0.5857
MIMAT0003261	hsa-miR-593*	23071	ERP44	uc010msz.2	CR602500	cgACUCGUUACGGA-CC--GACCACGGa	| |||| | :| || :|||||||	gcUCAGCACUCAUUAGGACUUGGUGCCu	2	24	2118	2145	[hg19:9:102742835-102742862:-]	0.5604	153	7	-24.84	-0.2941
MIMAT0003261	hsa-miR-593*	5199	CFP	uc010nhu.2	AK310695	cgACUCGUUACGGACCGAC-CACGGa	|||||| || |||| |||||	auUGAGCA----CUUGCUGUGUGCCa	2	24	1137	1158	[hg19:X:47484295-47484316:-]	0.5871	130	0	-25.82	-0.1216
MIMAT0003261	hsa-miR-593*	51696	HECA	uc003qin.2	NM_016217	cgacucgUUACGGACCG-ACCACGGa	|| | : | | |||||||	uacuuuaAAAGAUAGACAUGGUGCCa	2	19	2964	2989	[hg19:6:139501206-139501231:+]	0.4986	145	7	-13.31	-0.2554
MIMAT0003261	hsa-miR-593*	827	CAPN6	uc004epc.1	NM_014289	cgacucgUUACGGACCGAC-CACGGa	:| |||| |||| |||||	cucaaugGAAGCCU-GCUGUGUGCCa	2	19	703	727	[hg19:X:110489078-110489102:-]	0.6791	128	0	-23.33	-0.6225
MIMAT0003261	hsa-miR-593*	25771	TBC1D22A	uc003bib.2	NM_014346	cgaCUCGUUACGGACCGA-CCACGGa	|||: || ||| || ||||||	uugGAGUCCUG-CUGUCUGGGUGCCa	2	23	344	368	[hg19:22:47569613-47569637:+]	0.5661	132	6	-22.76	-0.2079
MIMAT0003261	hsa-miR-593*	100287718	LOC100287718	uc011dwf.1	NM_001162435	cgacUCGUUAC---GGACCGACCACGGa	:|||| | ::| ||||||||	uucuGGCAAGGAACUUUCCCUGGUGCCa	2	22	18	45	[hg19:6:46726676-46726703:+]	0.4803	152	7	-25.15	-0.2343
MIMAT0003261	hsa-miR-593*	54800	KLHL24	uc003flv.2	NM_017644	cgacucgUUACGGACCGACCACGGa	||| : :|||||||	uaguaaaAAUAAUAAUUUGGUGCCu	2	19	105	129	[hg19:3:183397179-183397203:+]	0.5246	142	7	-16.68	-0.405
MIMAT0003261	hsa-miR-593*	131408	FAM131A	uc003fog.2	NM_144635	cgaCUCGUUACGGACC--GACC-ACGGa	|| || | ||| |||| ||||	gugGAAGAAAGGAUGGCUCUGGUUGCCa	2	23	806	833	[hg19:3:184063564-184063591:+]	0.5272	121	0	-17.41	-0.2536
MIMAT0003261	hsa-miR-593*	56110	PCDHGA5	uc003lju.1	NM_018918	cgacucGUUACGGACC-GACCACGGa	||| || ||| :|||||||	uuccccCAAAGCAUGGUUUGGUGCCa	2	20	498	523	[hg19:5:140891238-140891263:+]	0.6	166	7	-21.9	-0.4899
MIMAT0003261	hsa-miR-593*	355	FAS	uc010qnc.1	NR_028033	cgACUCGUUAC--GGACCGAC-CACGGa	||:| :||| || | ||| |||||	aaUGGG-GAUGAACCAGACUGCGUGCCc	2	24	572	598	[hg19:10:90767486-90767512:+]	0.7104	128	0	-20.79	-0.1908
MIMAT0003261	hsa-miR-593*	91663	MYADM	uc002qcl.2	NM_001020820	cgacUCGUUACG-GACCGACC-ACGGa	|| || || |||||| ||||	uuaaAGGAA-GCAGGGGCUGGAUGCCu	2	22	985	1010	[hg19:19:54378737-54378762:+]	0.6118	122	0	-26.55	-0.2539
MIMAT0003261	hsa-miR-593*	79676	OGFOD2	uc001udz.1	NM_024623	cgACUCGUUA-CGGACCGACCACGGa	||||| | ||| :|||||||	ggUGAGCCUUCACCU-UUUGGUGCCu	2	24	592	616	[hg19:12:123464485-123464509:+]	0.5028	156	7	-26.49	-0.5464
MIMAT0003261	hsa-miR-593*	26284	ERAL1	uc002hcz.1	AF082658	cgacUCGU-UACGGACCGACCACGGa	| || | ||:| ||||||||	auccAACAGAAGCUU--CUGGUGCCc	2	22	972	995	[hg19:17:27186263-27186286:+]	0.6823	153	7	-20.52	-0.4048
MIMAT0003261	hsa-miR-593*	94122	SYTL5	uc004ddx.2	NM_001163334	cgacucGUUACGGACCGAC-CACGGa	:|: |:|| |||| |||||	aacauuUAGGGUCUUGCUGAGUGCCu	2	20	147	172	[hg19:X:37986130-37986155:+]	0.5577	131	0	-23.36	-0.8292
MIMAT0003261	hsa-miR-593*	80833	APOL3	uc003aot.2	NM_145640	cgaCUCGUUACGGACCGAC-CACGGa	|||| || ||| |||| |||||	cuaGAGCCAU-CCU-GCUGAGUGCCc	2	23	812	835	[hg19:22:36536413-36536436:-]	0.5108	138	0	-26.63	-0.2681
MIMAT0003261	hsa-miR-593*	79969	C6orf134	uc011hmj.1	AK297661	cgACUCGUUACGGACCG-AC-CACGGa	||:| |: ||||| || |||||	agUGGGAAGCCACUGGCUUGUGUGCCa	2	24	345	371	[hg19:6_mcf_hap5:1992995-1993021:+]	0.5451	130	0	-24.96	-0.1566
MIMAT0003261	hsa-miR-593*	8476	CDC42BPA	uc001hqr.2	NM_003607	cgACUCGUUACGGACCGACCACGGa	| | || | : | :|||||||	uuUAAACAUUCUGAGUUUGGUGCCa	2	24	1911	1935	[hg19:1:227180034-227180058:-]	0.4922	151	7	-20.52	-0.1987
MIMAT0003261	hsa-miR-593*	51185	CRBN	uc003bpq.2	NM_016302	cgacucguuACGGACCG-ACCACGGa	|| | || |||||||	acaucuacuUGGGUAGCUUGGUGCCa	2	17	219	244	[hg19:3:3192305-3192330:-]	0.5057	147	7	-20.05	-0.6494
MIMAT0003261	hsa-miR-593*	100132708	C2orf14	uc002trt.2	BC069809	cgaCUCGUUACGGACCGACC-ACGGa	|| | | |:||| |||| ||||	agaGACCCAAGUCUGCCUGGCUGCCu	2	23	1204	1229	[hg19:2:131439665-131439690:+]	0.7513	138	0	-27.16	-0.2544
MIMAT0003261	hsa-miR-593*	10645	CAMKK2	uc001tzx.2	NM_153499	cgacucguuacggaccgACCACGGa	|||||||	auaaacagacagcaaaaUGGUGCCa	2	9	3080	3104	[hg19:12:121675496-121675520:-]	0.7152	140	7	-16.27	-1.156
MIMAT0003261	hsa-miR-593*	114044	MCM3APAS	uc002zin.2	AK001370	cgacUCGUUACGGACCG-ACCACGGa	||||: ||: ||| |||||||	aagaAGCAG-GCUGGGCUUGGUGCCc	2	22	1708	1732	[hg19:21:47671225-47671249:+]	0.5006	166	7	-28.97	-0.1577
MIMAT0003261	hsa-miR-593*	2629	GBA	uc001fjh.2	NM_000157	cgacucguuacGGACCGACCACGGa	:|| | |||||||	ucacuuuccccUCUAGGUGGUGCCa	2	15	148	172	[hg19:1:155204614-155204638:-]	0.5298	150	7	-17.39	-0.1247
MIMAT0003261	hsa-miR-593*	10417	SPON2	uc003gcm.1	AK024499	cgACUCGUUACGGACCGACCACGGa	|| |:| || | | |||||||	agUGCGUACUG-CAAGAUGGUGCCu	2	24	280	303	[hg19:4:1164058-1164081:-]	0.5063	157	7	-22.36	-0.1089
MIMAT0003261	hsa-miR-593*	79145	CHCHD7	uc003xsw.2	NM_001011670	cgaCUCGUUACGGACCGACC-ACGGa	|| || ||::| ||| ||||	caaGAACAUUGUUUUAAUGGCUGCCg	2	23	1182	1207	[hg19:8:57131045-57131070:+]	0.5943	126	0	-16.01	-0.782
MIMAT0003261	hsa-miR-593*	126859	C1orf125	uc009wxg.2	BC146823	cgACUCGUUACGGACCGACCACGGa	|| :|| |:|| |||||||	guUGUUUAA--CUUGCAUGGUGCCa	2	24	3328	3350	[hg19:1:179523823-179523845:+]	0.5191	152	7	-19.33	-0.1902
MIMAT0003261	hsa-miR-593*	6992	PPP1R11	uc011grn.1	BC003144	cgacucguuacggaccGACCACGGa	:|||||||	------------gcauUUGGUGCCg	2	10	1	13	[hg19:6_mann_hap4:1333524-1333536:+]	0.66	141	7	-14.25	-0.2535
MIMAT0003261	hsa-miR-593*	474149	TTTY4B	uc004fwh.2	NR_002178	cgACUCGUUACGGACCGACCACGGa	| | ||| | | || ||||| |	uaUAACCAAAGACGGGAUGGUGACa	2	24	944	968	[hg19:Y:26752770-26752794:+]	0.9603	135	0	-12.85	-0.1378
MIMAT0003261	hsa-miR-593*	144165	PRICKLE1	uc010skv.1	NM_001144881	cgacucguuACGGACCGACCACGGa	| ::||| |||||||	aauuuacccUCUUUGGAUGGUGCCa	2	17	177	201	[hg19:12:42853410-42853434:-]	0.5937	156	7	-19.24	-0.5381
MIMAT0003261	hsa-miR-593*	112770	C1orf85	uc001foh.2	NM_144580	cgacucguuACGGACCGACC-ACGGa	|| ||||:||| ||||	gaggcauucUGACUGGUUGGCUGCCc	2	17	293	318	[hg19:1:156262517-156262542:-]	0.5768	132	0	-25.78	-0.5977
MIMAT0003261	hsa-miR-593*	645752	LOC645752	uc010bky.2	NR_027024	cgACUCGUUACGGAC-CGACCACGGa	|| |: ::|| ||||||||	agUGUGUUUCAUUUGUUCUGGUGCCa	2	24	746	771	[hg19:15:78206755-78206780:-]	0.506	146	7	-19.36	-0.6508
MIMAT0003261	hsa-miR-593*	3105	HLA-A	uc011igw.1	CR590761	cgACUCGUUACGGACCGACCACGGa	||:|| :| : ||| |||||||	agUGGGC-GUCUGUGG-UGGUGCCu	2	24	181	203	[hg19:6_qbl_hap6:1204879-1204901:+]	0.6067	159	7	-30.26	-0.1586
MIMAT0003261	hsa-miR-593*	59342	SCPEP1	uc010dcl.2	BC010078	cgACUCGUUACG--GACCG--ACCACGGa	| ||: |||: |||: |||||||	guUCAGUUAUGUGAAUGGUAGUGGUGCCu	2	24	416	444	[hg19:17:55065103-55065131:+]	0.7122	153	7	-24.54	-0.2836
MIMAT0003261	hsa-miR-593*	222484	LNX2	uc001url.3	NM_153371	cgacucGUUACGGACCGACCACGGa	| || ::| :|||||||	ccguucCCAUUUUUUAUUGGUGCCa	2	20	759	783	[hg19:13:28121689-28121713:-]	0.5429	151	7	-14.08	-0.9469
MIMAT0003261	hsa-miR-593*	4091	SMAD6	uc002aqf.2	NM_005585	cgAC-UCGUUACGGACCGACCACGga	|| | : || : || ||||||	aaUGUAAUUAUUUAUGUAUGGUGCaa	3	24	194	219	[hg19:15:67074067-67074092:+]	0.778	130	0	-12.51	-0.3956
MIMAT0003261	hsa-miR-593*	1198	CLK3	uc010uln.1	NM_001130028	cgaCUCGUUACGGACCGACCACGGa	||||| | || |||||||	gggGAGCA--GACU---UGGUGCCc	2	23	137	156	[hg19:15:74922361-74922380:+]	0.6711	147	7	-22.15	-0.3611
MIMAT0003261	hsa-miR-593*	5098	PCDHGC3	uc003lkv.1	NM_002588	cgacucGUUACGGACC-GACCACGGa	||| || ||| :|||||||	uuccccCAAAGCAUGGUUUGGUGCCa	2	20	498	523	[hg19:5:140891238-140891263:+]	0.6	166	7	-21.9	-0.4899
MIMAT0003261	hsa-miR-593*	387755	INSC	uc001mly.2	NM_001031853	cgacucGUUAC--GGAC-CGACCA-CGGa	||:|| |:|| |:|||| |||	ugcacuCAGUGACCUUGCGUUGGUAGCCa	2	20	866	894	[hg19:11:15268452-15268480:+]	0.5528	125	0	-23.57	-0.55
MIMAT0003261	hsa-miR-593*	677	ZFP36L1	uc001xki.1	AK024202	cgacUCGUUACGGACC---GACCACGGa	|| |: | || | :||||||:	gacuAGGAGAGACUUGAUUUUGGUGCUa	2	22	115	142	[hg19:14:69255391-69255418:-]	0.6733	132	0	-17.81	-0.1662
MIMAT0003261	hsa-miR-593*	2719	GPC3	uc004exe.1	NM_004484	cgacucguuacgGACCGACCACGGa	||| ||||||||	------------CUGCCUGGUGCCc	2	14	1	13	[hg19:X:132670139-132670151:-]	0.6702	157	7	-19.46	-0.7564
MIMAT0003261	hsa-miR-593*	4801	NFYB	uc001tkl.1	NM_006166	cgacucGUUACG-GACC--GACCACGGa	:|:||| || | |||||||	uaguccUAGUGCUCUUGAAAUGGUGCCc	2	20	757	784	[hg19:12:104512731-104512758:-]	0.5781	149	7	-21.83	-0.3876
MIMAT0003261	hsa-miR-593*	4801	NFYB	uc001tkl.1	NM_006166	cgacuCGUUACGGACCG-ACCACGGa	|| ||:: | |||||||	ugucuGCCCUGUUAAACUUGGUGCCc	2	21	607	632	[hg19:12:104512883-104512908:-]	0.5861	143	7	-19	-0.4739
MIMAT0003261	hsa-miR-593*	203068	TUBB	uc011elx.1	NM_178014	cgacucguUACGGACCGACCACGGa	|| :|| ||||||||	gacccuguAUUUCUUUCUGGUGCCc	2	18	234	258	[hg19:6_apd_hap1:2004050-2004074:+]	0.6657	157	7	-21.83	-0.4879
MIMAT0003261	hsa-miR-593*	10251	SPRY3	uc004fxi.1	NM_005840	cgACUCGUUACGGAC--CGACCACGGa	||| :| || ||| |||||||	aaUGA-UAUUG-CUGCAAAUGGUGCCa	2	24	2219	2243	[hg19:Y:59109625-59109649:+]	0.7182	146	7	-19.15	-0.2285
MIMAT0003261	hsa-miR-593*	199786	FAM129C	uc002ngz.3	AK074069	cgACUCGUUACGGACCGACCACGGa	||| ||| || :|||||||	auUGACCAAGACC--CUUGGUGCCa	2	24	2528	2550	[hg19:19:17657597-17657606,17660264-17660276:+]	0.6136	156	7	-22.04	-0.195
MIMAT0003261	hsa-miR-593*	54165	DCUN1D1	uc003fld.1	NM_020640	cgacucguuacggaccGACCACGGa	:|||||||	aauuuuuuaggauaacUUGGUGCCu	2	10	605	629	[hg19:3:182662253-182662277:-]	0.6126	141	7	-16.36	-0.6039
MIMAT0003261	hsa-miR-593*	10020	GNE	uc010mli.2	NM_001128227	cgacucgUUACGGACCGAC-CACGGa	|:||||| ||| |||||	cuuauuaAGUGCCU-ACUGUGUGCCa	2	19	1657	1681	[hg19:9:36215681-36215705:-]	0.6571	128	0	-22.77	-0.1676
MIMAT0003261	hsa-miR-593*	6092	ROBO2	uc003dpy.3	NM_002942	cgAC-UCGUUA-CGGACCGACCACGGa	|| | :||| | ||| |||||||	ugUGAAUUAAUAGGCUG--UGGUGCCa	2	24	367	391	[hg19:3:77695573-77695597:+]	0.8038	154	7	-19.16	-1.1328
MIMAT0003261	hsa-miR-593*	5899	RALB	uc002tmm.2	CR601386	cgacucguuacggaccgaCCACGGa	||||||	agcgacauuucauauauaGGUGCCa	2	8	1828	1852	[hg19:2:121052112-121052136:+]	0.6328	120	6	-12.86	-0.1065
MIMAT0003261	hsa-miR-593*	79989	TTC26	uc003vus.2	NM_024926	cgacucguuacGGACCGACCACGGa	|:| ||||||||	aagauuuuggaCUUAUCUGGUGCCu	2	15	215	239	[hg19:7:138874393-138874417:+]	0.5767	150	7	-20.61	-0.7521
MIMAT0003261	hsa-miR-593*	1429	CRYZ	uc001dgj.2	NM_001889	cgacucguUACGGACCGACC-ACGGa	|| :|||:||| ||||	uuuacuucAUUAUUGGUUGGCUGCCa	2	18	551	576	[hg19:1:75171404-75171429:-]	0.5368	125	0	-20.5	-0.9927
MIMAT0003261	hsa-miR-593*	55719	FAM178A	uc001kru.1	AK057741	cgacucgUUA--CGGACCG-ACCACGGa	||| ||| | | |||||||	auacaaaAAUUAGCCAGUCAUGGUGCCa	2	19	192	219	[hg19:10:102686203-102686230:+]	0.515	152	7	-17.4	-0.8465
MIMAT0003261	hsa-miR-593*	23213	SULF1	uc003xyi.1	AK123744	cgacucgUUACGGA-CCGACCACGGa	:||| || | |||||||	caaucaaGAUGGCUAGAAUGGUGCCu	2	19	314	339	[hg19:8:70571871-70571896:+]	0.5759	153	7	-21.54	-0.5712
MIMAT0003261	hsa-miR-593*	80824	DUSP16	uc001rao.1	NM_030640	cgACUCGUUACGG-ACCGACCA-CGGa	||| || | || | ||||| |||	uuUGACCACUACCAUAUCUGGUAGCCc	2	24	622	648	[hg19:12:12629119-12629145:-]	0.6424	130	0	-17.29	-0.6085
MIMAT0003261	hsa-miR-593*	4122	MAN2A2	uc002bqc.2	NM_006122	cgACUCGUUACGGACCG-ACCACGGa	|| | | |||:| || |||||||	aaUGUGAACUGCUUAGCAUGGUGCCu	2	24	2598	2623	[hg19:15:91465615-91465640:+]	0.5411	170	7	-24.57	-0.1165
MIMAT0003261	hsa-miR-593*	51503	CWC15	uc001pfd.3	NM_016403	cgacucguuacggaccgaCCACGGa	||||||	ucuaaauaaccaaaucugGGUGCCc	2	8	257	281	[hg19:11:94696269-94696293:-]	0.6021	120	6	-15.16	-0.1116
MIMAT0003261	hsa-miR-593*	4478	MSN	uc004dwf.2	NM_002444	cgACUCG-UUACGGACCG------ACCACGGa	||:|| |||| |||| |||||||	ccUGGGCAAAUGAAUGGCUCACUAUGGUGCCa	2	24	176	207	[hg19:X:64959931-64959962:+]	0.5753	157	7	-32.24	-0.2768
MIMAT0003261	hsa-miR-593*	4478	MSN	uc004dwf.2	NM_002444	cgacucguuacggaccgACCACGGa	|||||||	aggguggaugggggaaaUGGUGCCu	2	9	645	669	[hg19:X:64960400-64960424:+]	0.5859	140	7	-22.97	-0.3018
MIMAT0003261	hsa-miR-593*	56666	PANX2	uc003bjo.3	NM_001160300	cgACUCGUUACGGACCGACCACGGa	|| ||| | | |||||||	cgUGUGCACAGAGGGUGUGGUGCCa	2	24	740	764	[hg19:22:50618429-50618453:+]	0.465	151	7	-20.63	-0.1332
MIMAT0003261	hsa-miR-593*	5153	PDE1B	uc001sgd.1	NM_000924	cgACUCGUUACGGACC-GA-CCACGGa	| ||| || | || || ||||||	ucUUAGC--UGGCAGGUCUGGGUGCCc	2	24	434	458	[hg19:12:54972060-54972084:+]	0.6962	123	6	-28.54	-0.3036
MIMAT0003261	hsa-miR-593*	5153	PDE1B	uc001sgd.1	NM_000924	cgacucGUUACGGACCGACC-ACGGa	|| ||| || ||| ||||	ucucuuCAUGGCCAGG-UGGCUGCCa	2	20	267	291	[hg19:12:54971893-54971917:+]	0.6918	121	0	-18.67	-0.1092
MIMAT0003261	hsa-miR-593*	6992	PPP1R11	uc011grm.1	AK310593	cgacucguuacggaccGACCACGGa	:|||||||	------------gcauUUGGUGCCg	2	10	1	13	[hg19:6_mann_hap4:1333524-1333536:+]	0.66	141	7	-14.25	-0.2433
MIMAT0003261	hsa-miR-593*	1200	TPP1	uc001mel.1	NM_000391	cgacucGUUACGGACCGACCACGGa	||| || |:|||||||	ccuuucCAAGACC--GUUGGUGCCu	2	20	1663	1685	[hg19:11:6634092-6634114:-]	0.6069	152	7	-21.6	-0.3845
MIMAT0003261	hsa-miR-593*	3249	HPN	uc002nxq.1	NM_002151	cgACUCGUUACGGACCGA-CCACGGa	||:| | | |||| || ||||||	ucUGGG-ACU-CCUGUCUAGGUGCCc	2	24	218	241	[hg19:19:35557409-35557432:+]	0.6644	131	6	-28.01	-0.5454
MIMAT0003261	hsa-miR-593*	1633	DCK	uc003hfx.2	NM_000788	cgACUCGUUACGGACCGACCACGGa	| :|| | ::| ||||||||	ggUUGGC-UUUUUUCCCUGGUGCCu	2	24	337	360	[hg19:4:71895432-71895455:+]	0.5659	149	7	-24.01	-0.1672
MIMAT0003261	hsa-miR-593*	541565	C8orf58	uc003xce.2	NM_001013842	cgaCUCGUUACGGACCG--ACC-ACGGa	||| | |: |||| ||| ||||	acaGAGAACGGUGUGGCUUUGGCUGCCu	2	23	531	558	[hg19:8:22461350-22461377:+]	0.541	125	0	-24.52	-0.1258
MIMAT0003261	hsa-miR-593*	4969	OGN	uc004asa.2	NM_014057	cgacucGUUACGGACCGACCACGGa	::||| || |||||||	aauuuaUGAUGACUCAGUGGUGCCa	2	20	1061	1085	[hg19:9:95146817-95146841:-]	0.541	155	7	-15.62	-0.724
MIMAT0003261	hsa-miR-593*	4969	OGN	uc004asa.2	NM_014057	cgacUCGUUA-CGGACCGACCACGGa	|| ||| :||| |||||||	aaacAG-AAUAUUCUG--UGGUGCCa	2	22	890	912	[hg19:9:95146990-95147012:-]	0.5349	147	7	-17.14	-0.3167
MIMAT0003261	hsa-miR-593*	9315	C5orf13	uc011cvr.1	NM_001142475	cgACUC-GUUACGGACCGACCACGGa	|||| || || || ||||||:	ccUGAGACACUG-AUGAAUGGUGCUa	2	24	537	561	[hg19:5:111066057-111066081:-]	0.8367	144	0	-22.64	-0.1536
MIMAT0003261	hsa-miR-593*	89910	UBE3B	uc010sxp.1	AK304678	cgacucGUUACGGACCGAC-CACGGa	||| ||| | || |||||	ccaauuCAAGGCCACGAUGUGUGCCu	2	20	497	522	[hg19:12:109972366-109972391:+]	0.6582	127	0	-18.73	-0.1756
MIMAT0003261	hsa-miR-593*	57494	RIMKLB	uc001qux.2	NM_020734	cgacucguuACGGACCGACCACGGa	| |:| :|||||||	auaguuuuuUUCUUUUUUGGUGCCu	2	17	2885	2909	[hg19:12:8929265-8929289:+]	0.6083	148	7	-17.98	-1.0378
MIMAT0003261	hsa-miR-593*	6992	PPP1R11	uc011hks.1	AK310593	cgacucguuacggaccGACCACGGa	:|||||||	------------gcauUUGGUGCCg	2	10	1	13	[hg19:6_mcf_hap5:1416830-1416842:+]	0.6629	141	7	-14.25	-0.2581
MIMAT0003261	hsa-miR-593*	272	AMPD3	uc001min.1	NM_000480	cgACUC-GUUACGGACCGACC-ACGGa	| || | || ||||||| ||||	uuUCAGCCUCUGGAUGGCUGGCUGCCu	2	24	392	418	[hg19:11:10527823-10527849:+]	0.6038	130	0	-25.89	-0.579
MIMAT0003261	hsa-miR-593*	6525	SMTN	uc003ajk.1	NM_134269	cgacucgUUACGG--ACC-GAC-CACGGa	:||||: ||| ||| |||||	ccccacgGAUGCUGGUGGACUGUGUGCCc	2	19	14	42	[hg19:22:31497029-31497035,31500302-31500323:+]	0.6719	124	0	-21.94	-0.1351
MIMAT0003261	hsa-miR-593*	23366	KIAA0895	uc003tfd.2	NM_001100425	cgacUCGU-UACG-GACCGACCACGGa	|| | || | || |||||||||	aaacAGGAUAUACUCUAGCUGGUGCCc	2	22	1394	1420	[hg19:7:36364949-36364975:-]	0.579	163	7	-23.07	-0.148
MIMAT0003261	hsa-miR-593*	5261	PHKG2	uc002dzl.1	S73483	cgacucguuacggaccGACCACGGa	:|||||||	gcucuggccuucucccUUGGUGCCa	2	10	409	433	[hg19:16:30763076-30763100:+]	0.5222	141	7	-20.5	-0.4929
MIMAT0003261	hsa-miR-593*	8844	KSR1	uc002gzl.1	AK130719	cgACUCGUUACGGACCG--AC-CACGGa	| ||| | | |||: || |||||	aaUUAGCCAAGAGUGGUUGUGUGUGCCu	2	24	1874	1901	[hg19:17:25906751-25906778:+]	0.507	122	0	-20.66	-0.1917
MIMAT0003261	hsa-miR-593*	3683	ITGAL	uc010veu.1	AK298674	cgACUCGUUACGGACCGACCACGGa	||| |||| ||| :|||||||	guUGACCAAUACCU--UUGGUGCCa	2	24	732	754	[hg19:16:30492870-30492892:+]	0.7078	172	7	-26.05	-1.1902
MIMAT0003261	hsa-miR-593*	84364	ARFGAP2	uc001ndt.2	NM_032389	cgacUCGUUACGG-ACCGACCACGGa	|||| ||:| | :|||||||	gccaAGCACUGUCAUUCUUGGUGCCa	2	22	957	982	[hg19:11:47186051-47186076:-]	0.5665	164	7	-23.51	-0.5364
MIMAT0003261	hsa-miR-593*	1823	DSC1	uc002kwn.2	NM_024421	cgacucGUUACGGACCGACCACGGa	:|: | | |:|||||||	uguucuUAGAACAUAGUUGGUGCCa	2	20	411	435	[hg19:18:28710042-28710066:-]	0.5404	151	7	-18.17	-0.8752
MIMAT0003261	hsa-miR-593*	53615	MBD3	uc002ltk.2	BC043619	cgaCUCGUUACGGACCGAC-CACGGa	|:|||: |:| ||| |||||	aucGGGCAG-CCUUCCCUGUGUGCCa	2	23	606	630	[hg19:19:1577533-1577557:-]	0.5038	124	0	-23.78	-0.1498
MIMAT0003261	hsa-miR-593*	55140	ELP3	uc003xgo.3	NM_018091	cgaCUCGUUACGGACCGAC-CACGGa	| | |:| :| ||:|| |||||	cggGUGGAGUCUCAGGUUGUGUGCCc	2	23	783	808	[hg19:8:28048025-28048050:+]	0.5245	130	0	-23.62	-0.4776
MIMAT0003261	hsa-miR-593*	6570	SLC18A1	uc003wzm.2	NM_003053	cgacucGUUACGGACCGACCACGGa	| |||||| |||||||	cuuccuCUAUGCCU---UGGUGCCg	2	20	181	202	[hg19:8:20003072-20003093:-]	0.4858	155	7	-20.92	-0.114
MIMAT0003261	hsa-miR-593*	65009	NDRG4	uc002enq.1	AK124005	cgaCUC-GUUACGGACCG-AC-CACGGa	||| | |||: |||: || |||||	agaGAGCCCAUGUGUGGUGUGUGUGCCc	2	23	215	242	[hg19:16:58546259-58546286:+]	0.4925	132	0	-25.87	-0.1526
MIMAT0003261	hsa-miR-593*	85360	SYDE1	uc002nah.1	NM_033025	cgacuCGUUACGGACCG--ACCACGGa	| ||| || : |||||||	acccuGAAAUCCCCAAUAAUGGUGCCu	2	21	883	909	[hg19:19:15225657-15225683:+]	0.5951	143	7	-20.92	-0.487
MIMAT0003261	hsa-miR-593*	3653	IPW	uc010ayl.2	NR_023915	cgaCUCGUUACGGAC-CGACCACGGa	| | | | :|| |:|||||||	gagGUGGAUUUGUUGAGUUGGUGCCa	2	23	1101	1126	[hg19:15:25364226-25364251:+]	0.7134	153	7	-22.89	-0.5576
MIMAT0003261	hsa-miR-593*	2295	FOXF2	uc003mtm.2	NM_001452	cgacucguuacggaccgaCCACGGa	||||||	acacuacauuuggauacaGGUGCCa	2	8	465	489	[hg19:6:1395559-1395583:+]	0.6741	120	6	-15.89	-0.1599
MIMAT0003261	hsa-miR-593*	403313	PPAPDC2	uc003zin.2	NM_203453	cgacUCGUUACGGACCGACCACGGa	||| :| | | |||||||	uuaaAGCUGUUCAUCCAUGGUGCCu	2	22	1226	1250	[hg19:9:4664489-4664513:+]	0.6336	153	7	-23.63	-0.4641
MIMAT0003261	hsa-miR-593*	79645	EFCAB1	uc003xqo.2	NM_024593	cgACUCGUUACGGACCG---ACC-ACGGa	|| | |||| | || ||| ||||	ccUGCCCCAUGCAUUGCAGAUGGUUGCCa	2	24	822	850	[hg19:8:49636451-49636479:-]	0.467	122	0	-17.92	-0.1879
MIMAT0003261	hsa-miR-593*	55200	PLEKHG6	uc001qnr.2	NM_018173	cgACU--CGUUACGGA-CCG-ACC-ACGGa	||| || || || ||| ||| ||||	aaUGACUGCCCUGGCUGGGCAUGGCUGCCu	2	24	216	245	[hg19:12:6437527-6437556:+]	0.5394	124	0	-26.2	-0.2321
MIMAT0003261	hsa-miR-593*	60682	SMAP1	uc003pfr.2	NM_001044305	cgacucguuacggaccgACCACGGa	|||||||	auuguguuuacauuuuaUGGUGCCu	2	9	762	786	[hg19:6:71570799-71570823:+]	0.6501	140	7	-18.02	-1.0923
MIMAT0003261	hsa-miR-593*	246	ALOX15	uc002fyh.2	NM_001140	cgacuCGUUACGGACCGACCACGGa	| |:||| | |||||||	aggcuGGAGUGC--AG-UGGUGCCa	2	21	394	415	[hg19:17:4534480-4534501:-]	0.5251	143	7	-24.27	-0.1682
MIMAT0003261	hsa-miR-593*	51031	GLOD4	uc002fru.2	NM_016080	cgacUCGUUACGGACCG--ACCACGGa	| :||||||| |: |||||||	ccacAUUAAUGCCUUGUCGUGGUGCCa	2	22	384	410	[hg19:17:663003-663029:-]	0.5313	168	7	-23.94	-0.2792
MIMAT0003261	hsa-miR-593*	6530	SLC6A2	uc002eih.2	NM_001043	cgACU-CGUUACGGAC--CGACCACGGa	||| ||| |:|| :|||||||	ucUGAUACAA-ACUUGCACUUGGUGCCc	2	24	1221	1247	[hg19:16:55737479-55737505:+]	0.5598	147	7	-23.22	-0.2915
MIMAT0003261	hsa-miR-593*	115111	SLC26A7	uc003yfa.2	NM_052832	cgaCUCGUUACGGACCG----ACCA-CGGa	|| :|:||::|| | |||| |||	aaaGAAUAGUGUUUGUCCCUAUGGUAGCCu	2	23	1535	1564	[hg19:8:92408860-92408889:+]	0.5794	121	0	-22.41	-0.3103
MIMAT0003261	hsa-miR-593*	55388	MCM10	uc001ima.2	NM_182751	cgACUCGUUACGGACCGACC-ACGGa	||||| ||: | |||| ||||	ggUGAGC--UGUAU--CUGGAUGCCu	2	24	1729	1750	[hg19:10:13253039-13253060:+]	0.5268	121	0	-23.83	-0.255
MIMAT0003261	hsa-miR-593*	118	ADD1	uc003gfu.2	CR936693	cgACUCGUUA-CGGACCG-----ACCACGGa	|| |:|| :||||: |||||||	gaUGCUCGAUAAUCUGGUAAGAAUGGUGCCa	2	24	802	832	[hg19:4:2901147-2901177:+]	0.7493	145	7	-22.67	-0.4735
MIMAT0003261	hsa-miR-593*	118	ADD1	uc003gfu.2	CR936693	cgacucguuACGG-ACCGACCACGGa	|||| :|||||||	ucauuucucUGCCAACUUUGGUGCCc	2	17	423	448	[hg19:4:2900768-2900793:+]	0.5004	143	7	-20.06	-0.1496
MIMAT0003261	hsa-miR-593*	203068	TUBB	uc011ikh.1	NM_178014	cgacucguUACGGACCGACCACGGa	|| :|| ||||||||	gacccuguAUUUCUUUCUGGUGCCc	2	18	235	259	[hg19:6_qbl_hap6:1985340-1985364:+]	0.6293	157	7	-21.83	-0.4191
MIMAT0003261	hsa-miR-593*	23223	RRP12	uc001knf.2	NM_015179	cgacucGUUAC-GGACCGACCACGGa	||: | | | ||||||||	acccuuCAGAGACAUCCCUGGUGCCu	2	20	174	199	[hg19:10:99116652-99116677:-]	0.5521	150	7	-22.45	-0.1042
MIMAT0003261	hsa-miR-593*	57720	GPR107	uc004bzc.3	BC039728	cgACUCGUU--ACGG-ACCG-ACCACGGa	||: |:| ||:: || : |||||||	ucUGGUCGACCUGUUGUGUUGUGGUGCCa	2	24	1442	1470	[hg19:9:132866782-132866810:+]	0.7725	148	7	-22.55	-0.1654
MIMAT0003261	hsa-miR-593*	10062	NR1H3	uc009ylm.2	NM_005693	cgACUCGUUACGGACCGACC-ACGGa	||: ::| |||||| ||| ||||	gaUGGCUGAGGCCUGG-UGGCUGCCu	2	24	36	60	[hg19:11:47290283-47290307:+]	0.5627	137	0	-33.81	-0.1072
MIMAT0003261	hsa-miR-593*	114805	GALNT13	uc010fod.2	AK123152	cgACUCGUUACGGACCGACCACGGa	||| || | | |||||||	ucUGAAGAA-GACAAAAUGGUGCCu	2	24	56	79	[hg19:2:155306971-155306994:+]	0.8041	145	7	-20.69	-0.8335
MIMAT0003261	hsa-miR-593*	5601	MAPK9	uc010jlc.2	NM_139070	cgacUCGUUACGGACC---GACCACGGa	|| |||| || :|||||||	gccuAGAUUUGCCAGGGUCUUGGUGCCa	2	22	2073	2100	[hg19:5:179661284-179661311:-]	0.5467	152	7	-24.65	-0.1842
MIMAT0003261	hsa-miR-593*	92840	REEP6	uc002ltc.2	NM_138393	cgacuCGUUACG-GACCGACCACGGa	||| || || ||||||||	ugccuGCA--GCACU-ACUGGUGCCu	2	21	645	667	[hg19:19:1497855-1497877:+]	0.5928	146	7	-25.3	-0.119
MIMAT0003261	hsa-miR-593*	84439	HHIPL1	uc001ygl.1	NM_032425	cgacucguuacGGACCGAC-CACGGa	|:|||||| |||||	ugcccuaacccCUUGGCUGUGUGCCu	2	15	73	98	[hg19:14:100135338-100135363:+]	0.5028	130	0	-25.66	-0.187
MIMAT0003261	hsa-miR-593*	80742	PRR3	uc011gsy.1	NM_025263	cgACUCGUUACGGACCGACCACGGa	||||::| || | :|||||||	aaUGAGUGAGGC--GCUUGGUGCCc	2	24	704	726	[hg19:6_mann_hap4:1879048-1879070:+]	0.6478	164	7	-21.98	-0.1553
MIMAT0003261	hsa-miR-593*	84695	LOXL3	uc002smp.1	NM_032603	cgacucguuacGGACCGA-CCACGGa	:||| || ||||||	ucauuuaacccUCUGUCUCGGUGCCc	2	15	529	554	[hg19:2:74760179-74760204:-]	0.6353	122	6	-17.86	-0.5202
MIMAT0003261	hsa-miR-593*	84978	FRMD5	uc001ztj.1	BC020191	cgaCUCGUUACGGACCGACCACGGa	|||| | ||| |||||||||	cagGAGCUUUUCCU-GCUGGUGCCa	2	23	437	460	[hg19:15:44165630-44165653:-]	0.5961	172	7	-29.9	-0.3926
MIMAT0003261	hsa-miR-593*	5860	QDPR	uc003gpd.2	NM_000320	cgacucguuACGGACCGACC-ACGGa	| |||| ||| ||||	gguauccuuUUCCUGUGUGGUUGCCc	2	17	484	509	[hg19:4:17488245-17488270:-]	0.5469	120	0	-16.95	-0.1982
MIMAT0003261	hsa-miR-593*	6093	ROCK1	uc002kte.2	NM_005406	cgacucGUUACGGACCGAC-CACGGa	| ||| || ||| |||||	------CCAUG--UGACUGAGUGCCc	2	20	1	18	[hg19:18:18531327-18531344:-]	0.5655	120	0	-14.8	-0.5221
MIMAT0003261	hsa-miR-593*	57501	KIAA1257	uc003elj.3	NM_020741	cgACUCGUUACGGACCGAC-CACGGa	||| ||| ||| |||| |||||	aaUGA-CAA-CCCU-GCUGCGUGCCa	2	24	13	35	[hg19:3:128690033-128690055:-]	0.5128	129	0	-22.64	-0.5866
MIMAT0003261	hsa-miR-593*	26610	ELP4	uc010rdz.1	AK304885	cgacucguuacggaccgACCACGGa	|||||||	aacacaggauuauaaaaUGGUGCCg	2	9	95	119	[hg19:11:31805181-31805205:+]	0.646	140	7	-15.1	-1.1892
MIMAT0003261	hsa-miR-593*	8320	EOMES	uc010hfn.2	BC131712	cgACUCGUUACG-GA---CCGACCACGGa	|| ||||| | || | ||||||	uuUGUGCAAUUCUCUAAAAGAAGGUGCCa	2	24	910	938	[hg19:3:27758411-27758439:-]	0.6604	125	6	-19.26	-0.1172
MIMAT0003261	hsa-miR-593*	5383	PMS2L5	uc003ubk.2	NR_027776	cgaCUCGUUACGGAC---CGACCACGGa	|| | |:||| |||||||||	guaGAAAACAGUCUGGAUGCUGGUGCCa	2	23	176	203	[hg19:7:74310336-74310363:+]	0.5747	157	7	-25.27	-0.5539
MIMAT0003261	hsa-miR-593*	388889	LOC388889	uc003adf.1	AK026502	cgacucGUUACGGACCGACCACGGa	||: | | |||||||	cagaccCAGGGACAUCAUGGUGCCu	2	20	1354	1378	[hg19:22:27114467-27114491:+]	0.5317	143	7	-19.32	-0.1
MIMAT0003261	hsa-miR-593*	4152	MBD1	uc002lei.3	NM_015846	cgacuCGUUACGGACCGACCACGGa	|||| | | ||||||||	gaacuGCAACAAC-GCCUGGUGCCc	2	21	356	379	[hg19:18:47795842-47795865:-]	0.7073	154	7	-22.19	-0.2573
MIMAT0003261	hsa-miR-593*	4152	MBD1	uc002lei.3	NM_015846	cgacucguuacggacCGACCACGGa	|||||||||	uguccugcagaagaaGCUGGUGCCc	2	11	182	206	[hg19:18:47796015-47796039:-]	0.7232	150	7	-22.87	-0.2515
MIMAT0003261	hsa-miR-593*	140739	UBE2F	uc002vxl.2	CR615230	cgacucGUUACGGA--CCG-ACCACGGa	|:|||| | | |||||||	aguuccCGAUGCGUACAACAUGGUGCCu	2	20	608	635	[hg19:2:238925251-238925275,238933983-238933985:+]	0.7509	145	7	-22.38	-0.6722
MIMAT0003261	hsa-miR-593*	57017	COQ9	uc002elq.2	NM_020312	cgacucguuacggaccgaCCACGGa	||||||	gagcuuugaaaaguauaaGGUGCCa	2	8	55	79	[hg19:16:57494591-57494615:+]	0.5639	120	6	-16.59	-0.1063
MIMAT0003261	hsa-miR-593*	55758	RCOR3	uc001hie.2	NM_001136225	cgacucgUUACGGACCGACCA-CGGa	:||||||| :|||| |||	aaauaaaGAUGCCUGUUUGGUAGCCu	2	19	216	241	[hg19:1:211486552-211486577:+]	0.6102	138	0	-26.87	-0.9443
MIMAT0003261	hsa-miR-593*	7710	ZNF154	uc010euf.2	NM_001085384	cgACU--CGUUACGGACCGAC-CACGGa	||| || || :|| :|| |||||	gcUGAAGGCCAUAUCUCAUUGAGUGCCa	2	24	85	112	[hg19:19:58212891-58212918:-]	0.4872	126	0	-20.61	-0.4396
MIMAT0003261	hsa-miR-593*	79618	HMBOX1	uc003xhg.2	BC009259	cgacuCGUUACGGACCG-ACCACGGa	|::| | |||| |||||||	guucuGUGAAG-AUGGCAUGGUGCCc	2	21	279	303	[hg19:8:28908804-28908828:+]	0.7183	153	7	-24.33	-0.3281
MIMAT0003261	hsa-miR-593*	9111	NMI	uc002txj.2	AK124323	cgACUCGUUACGGACCG--AC-CACGGa	||:| |: :||||| || |||||	agUGGGGAGGAUCUGGCUUUGAGUGCCa	2	24	523	550	[hg19:2:152134739-152134766:-]	0.6058	130	0	-26.67	-0.2141
MIMAT0003261	hsa-miR-593*	127731	VWA5B1	uc001bde.3	AK057346	cgACUCGUUACGGACCGACC-ACGGa	||||::: :||| ||| ||||	acUGAGUGGGAGUUGG-UGGCUGCCa	2	24	2101	2125	[hg19:1:20680580-20680604:+]	0.7032	125	0	-25.54	-0.1185
MIMAT0003261	hsa-miR-593*	8925	HERC1	uc002amp.2	NM_003922	cgACUCGUUACGGACCGACCACGga	|| ::| || :||||||	uuUGCAUGAAACCAUUUUGGUGCau	3	24	257	281	[hg19:15:63900999-63901023:-]	0.6751	127	0	-14.68	-0.1969
MIMAT0003261	hsa-miR-593*	6667	SP1	uc001scw.2	NM_138473	cgACUCGUUACGGACCGACCACGGa	||| ||| :|| |:|||||||	agUGA-AAAU-UCU-GUUGGUGCCa	2	24	208	229	[hg19:12:53805232-53805253:+]	0.6858	157	7	-20.29	-0.3086
MIMAT0003261	hsa-miR-593*	9643	MORF4L2	uc011msa.1	NM_001142427	cgacucguuacggaccgACCACGGa	||||||:	cucuuuuuuuuuuuuuaUGGUGCUu	2	9	402	426	[hg19:X:102930663-102930687:-]	0.8482	124	0	-11.65	-0.3105
MIMAT0003261	hsa-miR-593*	79782	LRRC31	uc003fgc.1	NM_024727	cgacucguuacggaccGACCACGGa	||||||||	uuuauuauuuuauauuCUGGUGCCu	2	10	571	595	[hg19:3:169557175-169557199:-]	0.5123	145	7	-18.14	-0.951
MIMAT0003261	hsa-miR-593*	10564	ARFGEF2	uc002xtx.3	NM_006420	cgAC-UCGUUACGG-ACCGACCACGGa	|| | ::|||:| ||||||||	guUGUAUUGAUGUCAACUCUGGUGCCu	2	24	1446	1472	[hg19:20:47651182-47651208:+]	0.6176	153	7	-25.62	-0.1443
MIMAT0003261	hsa-miR-593*	8543	LMO4	uc001dmi.2	NM_006769	cgaCUCGUUACGGACCGAC-CACGGa	|||:|||| | | || |||||	ucaGAGUAAUG-CAGAAUGCGUGCCu	2	23	5	29	[hg19:1:87810484-87810508:+]	0.8109	132	0	-26.38	-0.5083
MIMAT0003261	hsa-miR-593*	23397	NCAPH	uc002svz.1	NM_015341	cgacUCGUUACG-GACCGACCACGGa	||::: || || |||||||	uuccAGUGG-GCACUUAAUGGUGCCc	2	22	364	388	[hg19:2:97039453-97039477:+]	0.4939	146	7	-21.46	-0.1127
MIMAT0003261	hsa-miR-593*	23397	NCAPH	uc002svz.1	NM_015341	cgaCUCGUUACGGA-C-----CG--ACCACGGa	|||| ||||:| | || |||||||	ucaGAGC-AUGCUUAGAAAAAGCAGUGGUGCCa	2	23	1341	1372	[hg19:2:97040430-97040461:+]	0.5811	145	7	-24.27	-0.1735
MIMAT0003261	hsa-miR-593*	222236	NAPEPLD	uc003vbc.2	NM_198990	cgACUCGU-UACGGACCGACCACGGa	|| || ||: || |||||||	uuUGCACACCUGUAUGUGUGGUGCCa	2	24	1331	1356	[hg19:7:102742219-102742244:-]	0.5449	154	7	-19.48	-0.1597
MIMAT0003261	hsa-miR-593*	9043	SPAG9	uc002itg.2	BC059946	cgAC-UCGUUACGGACCGACCACGGa	|| ||::| ||: | |||||||	guUGCAGUGA-GCUAAGAUGGUGCCa	2	24	643	667	[hg19:17:49108333-49108357:-]	0.5066	156	7	-22.09	-0.4846
MIMAT0003261	hsa-miR-593*	51304	ZDHHC3	uc011bad.1	NM_001135180	cgacUCGUUACGGACCGACCACGGa	||: | || :|||||||	ggccAGUUCUCCCAAAUUGGUGCCc	2	22	946	970	[hg19:3:44958417-44958441:-]	0.5437	149	7	-18.2	-0.2211
MIMAT0003261	hsa-miR-593*	57217	TTC7A	uc002rvo.2	NM_020458	cgacuCGUUACGGACCGACCACGGa	| | | |:| |:|||||||	uuccuGGAUUUCUUUGUUGGUGCCu	2	21	170	194	[hg19:2:47301232-47301256:+]	0.4959	160	7	-23.94	-0.1807
MIMAT0003261	hsa-miR-593*	7570	ZNF22	uc001jbw.2	NM_006963	cgacucGUUACGG-AC-C-GACCACGGa	|| | || || | |||||||	uuucuuCACUUCCAUGAGAAUGGUGCCa	2	20	1101	1128	[hg19:10:45500592-45500619:+]	0.5282	144	7	-15.87	-0.7853
MIMAT0003261	hsa-miR-593*	51388	NIP7	uc002exa.2	NM_016101	cgAC-UCGUUACGGACCGACCACGGa	|| ||::| ||| | |||||||	cuUGCAGUGA-GCCAAGAUGGUGCCa	2	24	878	902	[hg19:16:69376433-69376457:+]	0.5099	160	7	-21.97	-0.2525
MIMAT0003261	hsa-miR-593*	59352	LGR6	uc009xac.1	AK123055	cgacucGUUACGGACCGACCACGGa	| || :||| |||||||	cacacaCUAUCUCUGAAUGGUGCCa	2	20	752	776	[hg19:1:202270356-202270363,202272407-202272423:+]	0.6938	159	7	-19.36	-1.0776
MIMAT0003261	hsa-miR-593*	56103	PCDHGB2	uc003ljs.1	NM_018923	cgacucGUUACGGACC-GACCACGGa	||| || ||| :|||||||	uuccccCAAAGCAUGGUUUGGUGCCa	2	20	498	523	[hg19:5:140891238-140891263:+]	0.6	166	7	-21.9	-0.4899
MIMAT0003261	hsa-miR-593*	55629	PNRC2	uc001big.2	NM_017761	cgacUCGUUACGGACCG-ACCACGGa	:|:|:| :| |: |||||||	uacaGGUAGUUUCGAGUAUGGUGCCa	2	22	1172	1197	[hg19:1:24289539-24289564:+]	0.5178	152	7	-19.92	-0.798
MIMAT0003261	hsa-miR-593*	23414	ZFPM2	uc003ymd.2	NM_012082	cgACUCGUU--ACGGACCGACCACGGa	| ||:|| ||: | :|||||||	caUUAGUAAAGUGUAUUAUUGGUGCCa	2	24	156	182	[hg19:8:106815922-106815948:+]	0.722	158	7	-18.7	-1.3375
MIMAT0003261	hsa-miR-593*	6836	SURF4	uc004cdj.2	NM_033161	cgacucgUUA--CGGACC-GACCACGGa	||| ||:||| :|||||||	gucagaaAAUCAGCUUGGAUUGGUGCCa	2	19	617	644	[hg19:9:136229725-136229752:-]	0.4999	160	7	-24.45	-0.3378
MIMAT0003261	hsa-miR-593*	85364	ZCCHC3	uc002wdg.2	AK025768	cgacUCGU-UACGGACCGACCACGGa	| || || ||| ||||||||	gaaaAUCACAUAGCUGUCUGGUGCCa	2	22	1318	1343	[hg19:20:280239-280264:+]	0.7186	164	7	-21.03	-0.4843
MIMAT0003261	hsa-miR-593*	400322	HERC2P2	uc010azb.1	AK307870	cgacuCGUUACGGACCGACC-ACGGa	| ||||::| | ||| ||||	cauucGAAAUGUUUUGGUGGAUGCCa	2	21	1464	1489	[hg19:15:28886681-28886706:+]	0.6606	132	0	-18	-0.3636
MIMAT0003261	hsa-miR-593*	3681	ITGAD	uc002ebv.1	NM_005353	cgacucGUUACGGACCG-ACCACGGa	||: | ||| |||||||	uuuuuaCAGAAGCAGGCAUGGUGCCa	2	20	194	219	[hg19:16:31437643-31437668:+]	0.6039	150	7	-21.77	-1.0995
MIMAT0003261	hsa-miR-593*	3681	ITGAD	uc002ebv.1	NM_005353	cgaCUCGUUA--CGGACC---GAC-CACGGa	|||| || || || ||| |||||	gaaGAGCUAUAACCCAGGGACCUGAGUGCCu	2	23	290	320	[hg19:16:31437739-31437769:+]	0.5827	120	0	-23.39	-0.1889
MIMAT0003261	hsa-miR-593*	51105	PHF20L1	uc003ytv.2	AK023711	cgacUCGUUACGGACC--GACCACGGa	| |||||| | | :|||||||	ugauAACAAUGCGUUGUUUUGGUGCCu	2	22	887	913	[hg19:8:133824266-133824292:+]	0.6536	164	7	-26.65	-0.5969
MIMAT0003261	hsa-miR-593*	64478	CSMD1	uc011kwk.1	NM_033225	cgacUCGUUACGGACCGACCACGGa	||::|| ||| :|||||||	aagcAGUGAUUCCU--UUGGUGCCa	2	22	49	71	[hg19:8:2796036-2796058:-]	0.6595	162	7	-25.55	-0.5642
MIMAT0003261	hsa-miR-593*	57645	POGK	uc001gdt.1	NM_017542	cgACUCGUUACGGACCGACCACGGa	| || || |: | ||||||||	auUAAGACAUACUGGCCUGGUGCCa	2	24	593	617	[hg19:1:166822400-166822424:+]	0.6764	163	7	-25.12	-0.301
MIMAT0003261	hsa-miR-593*	26470	SEZ6L2	uc002duq.3	NM_201575	cgaCUCGUUACGGACCGACC-ACGGa	|: | ||||| |||| ||||	cccGGUCUCUGCCU-CCUGGCUGCCc	2	23	71	95	[hg19:16:29882925-29882949:-]	0.6569	124	0	-20.79	-0.1793
MIMAT0003261	hsa-miR-593*	401265	KLHL31	uc003pcb.3	NM_001003760	cgACUCGUUACGGACCGACCACGGa	| ||: | | | :|||||||	uuUUAGUUAGG--UUCUUGGUGCCa	2	24	2805	2827	[hg19:6:53513569-53513591:-]	0.6076	144	7	-16.08	-0.5067
MIMAT0003261	hsa-miR-593*	84847	MGC16075	uc003tnx.2	BC007354	cgacucGUUAC--GGAC-CGACCACGGa	||:|| ::|| ||||||||	caguguCAGUGUAUUUGCACUGGUGCCu	2	20	354	381	[hg19:7:47805536-47805563:+]	0.5548	153	7	-25.67	-0.1094
MIMAT0003261	hsa-miR-593*	148266	ZNF569	uc002ogi.2	NM_152484	cgaCUCGUUACGGACCG-ACC-ACGGa	|| | || : || | ||| ||||	augGAUCCAUAUAUGACUUGGUUGCCu	2	23	1337	1363	[hg19:19:37902136-37902162:-]	0.5655	121	0	-16.36	-0.5307
MIMAT0003261	hsa-miR-593*	56652	C10orf2	uc001ksi.2	NM_001163814	cgacuCGUUACGGAC-CGAC-CACGGa	|:::| |||| |||| |||||	auccuGUGGU-CCUGAGCUGUGUGCCc	2	21	426	451	[hg19:10:102753343-102753368:+]	0.5324	129	0	-26.25	-0.1484
MIMAT0003261	hsa-miR-593*	55623	THUMPD1	uc002dhp.2	BX640898	cgaCUCGU-UACGGACCGACCACGGa	||| | | | :| :|||||||	aggGAGGAUAGGAUU--UUGGUGCCu	2	23	2050	2073	[hg19:16:20745628-20745651:-]	0.5416	146	7	-20.15	-0.4086
MIMAT0003261	hsa-miR-593*	158747	MOSPD2	uc004cwi.2	NM_152581	cgacucguuacggaccgACCACGGa	|||||||	------------agaagUGGUGCCg	2	9	1	13	[hg19:X:14937932-14937944:+]	0.5885	140	7	-12.52	-0.1029
MIMAT0003261	hsa-miR-593*	23476	BRD4	uc002nas.2	NM_014299	cgacUCGUUACG--GACCGACCACGGa	||| |||| || ||||||||	ccacAGC-AUGCUUCUCACUGGUGCCc	2	22	578	603	[hg19:19:15359488-15359513:-]	0.5198	162	7	-24.91	-0.1097
MIMAT0003261	hsa-miR-593*	8509	NDST2	uc001jvl.1	AB208870	cgACUCGUUACGGACCGACCACGGa	||| |: | :| :|||||||	gaUGAUAAGGGAUU--UUGGUGCCa	2	24	133	155	[hg19:10:75562505-75562527:-]	0.7776	148	7	-16.84	-1.2012
MIMAT0003261	hsa-miR-593*	3763	KCNJ6	uc002ywo.2	NM_002240	cgacUCGUUACGGACCGACCACGGa	||||| |::| ||||||||	gacaAGCAAGGUUU--CUGGUGCCu	2	22	359	381	[hg19:21:38997080-38997102:-]	0.5568	166	7	-25.08	-0.8002
MIMAT0003261	hsa-miR-593*	26030	PLEKHG3	uc001xhp.2	AB385358	cgacucGUUACGGACCG--ACCACGga	|| | ::|| | ||||||	acauuuCAUUAUUUGCCAAUGGUGCaa	3	20	595	621	[hg19:14:65211016-65211042:+]	0.7217	130	0	-15.72	-0.1219
MIMAT0003261	hsa-miR-593*	646113	FLJ43390	uc010aps.1	AK096461	cgacucguuACGGACCGACC-ACGGa	| ||| |:||| ||||	aaaguaucuUCCCUAGUUGGAUGCCa	2	17	1817	1842	[hg19:14:62596563-62596588:+]	0.5999	124	0	-19.03	-0.7307
MIMAT0003261	hsa-miR-593*	340277	C7orf46	uc003swp.3	AL832127	cgacuCGUUACGG---ACCGACC-ACGGa	|| |||| || |||| ||||	gaucuGCCCUGCCAAGUGACUGGCUGCCa	2	21	381	409	[hg19:7:23728940-23728968:+]	0.729	123	0	-21.06	-0.158
MIMAT0003261	hsa-miR-593*	27198	GPR81	uc001ucz.2	NM_032554	cgACUCGU--UACGGACCGACCA-CGGa	| | || :|| || ||||| |||	ugUCAUCAUUGUGACUUCCUGGUAGCCc	2	24	891	918	[hg19:12:123212928-123212955:-]	0.547	122	0	-16.77	-0.5401
MIMAT0003261	hsa-miR-593*	28982	FLVCR1	uc001hjt.2	NM_014053	cgacucguUACGGACCGACC-ACGGa	|| ||| :||| ||||	uacaauauAUUCCUAAUUGGCUGCCu	2	18	432	457	[hg19:1:213069064-213069089:+]	0.5328	121	0	-18.36	-0.922
MIMAT0003261	hsa-miR-593*	29929	ALG6	uc009waj.2	CR618543	cgacucGUUACGGACCGACC-ACGGa	|: | :|| ||||| ||||	uuccuuCGUUCUCU-GCUGGCUGCCa	2	20	933	957	[hg19:1:63877636-63877660:+]	0.7145	121	0	-18.65	-0.585
MIMAT0003261	hsa-miR-593*	113178	SCAMP4	uc002luj.2	NM_079834	cgAC-UCGUUACGGACCG-ACCACGGa	|| ||::|| ||| |||||||	ccUGCAGUGAUAGAGGGCUUGGUGCCu	2	24	497	523	[hg19:19:1924780-1924806:+]	0.5224	157	7	-28.56	-0.1163
MIMAT0003261	hsa-miR-593*	6712	SPTBN2	uc001ojd.2	NM_006946	cgACUCGUUACGGACC-GACC-ACGGa	| :|| |||: || ||| ||||	caUAGGCCAUGUGGGGAGUGGCUGCCc	2	24	310	336	[hg19:11:66453006-66453032:-]	0.5307	122	0	-20.55	-0.1288
MIMAT0003261	hsa-miR-593*	196410	METTL7B	uc010spr.1	NM_152637	cgacucguuacggaccgACCACGGa	|||||||	acuggucacaaaagucaUGGUGCCu	2	9	375	399	[hg19:12:56078208-56078232:+]	0.54	140	7	-22.23	-0.3826
MIMAT0003261	hsa-miR-593*	50619	DEF6	uc003okk.2	NM_022047	cgaCUCG-UUACGGACCGACCACGGa	|||| :| |:| ||||||||	aggGAGCUGAGGUC---CUGGUGCCa	2	23	90	112	[hg19:6:35289277-35289299:+]	0.5657	153	7	-25.18	-0.103
MIMAT0003261	hsa-miR-593*	54107	POLE3	uc004bhn.2	NM_017443	cgacUCGUUA-CGGACCG-ACCACGGa	:|:| | |:| | |||||||	gaauGGUAUUAGUCAAACAUGGUGCCa	2	22	681	707	[hg19:9:116170384-116170410:-]	0.584	143	7	-17.18	-0.793
MIMAT0003261	hsa-miR-593*	1290	COL5A2	uc002uqk.2	NM_000393	cgacucguuacggacCGACCACGGa	| ||||||:	uauuuuuccuuuaauGAUGGUGCUa	2	11	1173	1197	[hg19:2:189897599-189897623:-]	0.7741	126	0	-12.18	-0.4157
MIMAT0003261	hsa-miR-593*	23	ABCF1	uc003nql.2	NM_001025091	cgACUCGUUACGGACC--GACCACGGa	| | | | || | :|||||||	caUUAUCCAGCCCAAGAUUUGGUGCCu	2	24	482	508	[hg19:6:30558960-30558986:+]	0.5678	142	7	-19.17	-0.3582
MIMAT0003261	hsa-miR-593*	114827	FHAD1	uc001awf.2	BC015238	cgacucguuacggacCGACCACGGa	| |||||||	uuaaaaucuagaaacGGUGGUGCCc	2	11	211	235	[hg19:1:15690508-15690532:+]	0.5445	142	7	-17.36	-0.1532
MIMAT0003261	hsa-miR-593*	4605	MYBL2	uc002xlb.1	NM_002466	cgACUCGUUACGGACCG-ACCACGga	|| || ||| | ||||||	ccUGUGCUCACCCUCUCUUGGUGCau	3	24	339	364	[hg19:20:42345066-42345091:+]	0.5844	130	0	-21.19	-0.1053
MIMAT0003261	hsa-miR-593*	4885	NPTX2	uc003upl.2	NM_002523	cgacucguuacggaccGACCACGGa	||||||||	aggccucucuucucauCUGGUGCCa	2	10	736	760	[hg19:7:98258677-98258701:+]	0.5597	145	7	-18.83	-0.5121
MIMAT0003261	hsa-miR-593*	57091	CASS4	uc002xxr.2	NM_020356	cgACUCG-UUACGGACCGACCACGGa	||||| :| | ||||||||	aaUGAGCUGAAACAGACCUGGUGCCc	2	24	100	125	[hg19:20:55033903-55033928:+]	0.534	154	7	-22.61	-0.2101
MIMAT0003261	hsa-miR-593*	222537	HS3ST5	uc003pwg.3	NM_153612	cgacUCGUUACGGACCGACCACGGa	| :|||||: :|||||||	agaaAUUAAUGCUAAAUUGGUGCCu	2	22	1341	1365	[hg19:6:114377056-114377080:-]	0.6112	161	7	-23.37	-0.7522
MIMAT0003261	hsa-miR-593*	222537	HS3ST5	uc003pwg.3	NM_153612	cgacucgUUACGGACCGACCACGGa	:||||: :|||||||	uaauucaGAUGCUGAAUUGGUGCCa	2	19	433	457	[hg19:6:114377964-114377988:-]	0.6738	154	7	-20.87	-1.1525
MIMAT0003261	hsa-miR-593*	79054	TRPM8	uc002vvh.2	NM_024080	cgACUCGUUACGGACCGACCACGGa	|| |: || | |||||||	uaUGUGUUUCUCCAGAAUGGUGCCu	2	24	219	243	[hg19:2:234926119-234926143:+]	0.4908	147	7	-18.94	-0.3681
MIMAT0003261	hsa-miR-593*	7812	CSDE1	uc001efm.2	NM_001130523	cgACUCGUUACGGACCGACCACGga	| || :| ::| :||||||	uuUUAG-GAGCUUUAUUUGGUGCau	3	24	245	268	[hg19:1:115260522-115260545:-]	0.7753	125	0	-16.26	-0.1462
MIMAT0003261	hsa-miR-593*	57669	EPB41L5	uc002tmg.2	NM_020909	cgaCUCGUUACGGAC-CGACC-ACGGa	|||| || |:|| |||| ||||	ugaGAGC-AUCCUUGAUCUGGCUGCCu	2	23	396	421	[hg19:2:120932879-120932904:+]	0.562	131	0	-25.83	-0.1341
MIMAT0003261	hsa-miR-593*	54620	FBXL19	uc002eab.2	NM_001099784	cgaCUCGUUACGG-ACCGACC-ACGGa	|:| | |||| |||| ||||	ccaGGGAACUGCCACUCCUGGUUGCCa	2	23	1068	1094	[hg19:16:30959619-30959645:+]	0.7337	121	0	-21.07	-0.5765
MIMAT0003261	hsa-miR-593*	9086	EIF1AY	uc004fuk.2	NM_004681	cgacucguuacggaccgaCCACGGa	||||||	uaacauuggaaauacuggGGUGCCa	2	8	676	700	[hg19:Y:22754908-22754932:+]	0.5938	120	6	-19.55	-0.2034
MIMAT0003261	hsa-miR-593*	8473	OGT	uc004eaa.1	NM_181672	cgacucguuacggaccGACCACGGa	||||||||	guuuuaaacacaccauCUGGUGCCa	2	10	747	771	[hg19:X:70794391-70794415:+]	0.5922	145	7	-17.95	-0.6844
MIMAT0003261	hsa-miR-593*	4357	MPST	uc011amu.1	NM_021126	cgacucGUUACGGACCGACC-ACGGa	|: || || |:||| ||||	gaauucCGUUGACUUGUUGGCUGCCa	2	20	140	165	[hg19:22:37425695-37425720:+]	0.5493	127	0	-16.73	-0.3766
MIMAT0003261	hsa-miR-593*	2901	GRIK5	uc002osj.1	NM_002088	cgACUCGU-UACGGAC---CGACCACGGa	||: || ||| || ||||||||	ucUGGACAGAUGGGUGUCCCCUGGUGCCc	2	24	372	400	[hg19:19:42502623-42502651:-]	0.6436	153	7	-26.15	-0.1164
MIMAT0003261	hsa-miR-593*	4000	LMNA	uc001fni.2	NM_170707	cgaCUCGUUACGGACCG-ACCACGGa	|:| | : || | |||||||	cccGGGGACCCUGUGACAUGGUGCCu	2	23	382	407	[hg19:1:156109279-156109304:+]	0.6321	145	7	-25.22	-0.288
MIMAT0003261	hsa-miR-593*	23095	KIF1B	uc009vmt.2	AK308121	cgACUCGUU--ACGGA-CCGACCACGGa	||| |:| || :| ||||||||	agUGAACGAGCUGAUUCAACUGGUGCCa	2	24	1006	1033	[hg19:1:10331593-10331620:+]	0.8199	153	7	-22.37	-1.0636
MIMAT0003261	hsa-miR-593*	10522	DEAF1	uc001lqq.1	NM_021008	cgacucguuacggaccgACCACGGa	|||||||	aacacacuuuaagcgaaUGGUGCCc	2	9	141	165	[hg19:11:644385-644409:-]	0.5214	140	7	-16.3	-0.3604
MIMAT0003261	hsa-miR-593*	23012	STK38L	uc001rhs.2	CR606717	cgACUCGUUACGGACCGACCACGGa	||: :| || | |||||||	uuUGGUAGAAGC--AGAUGGUGCCu	2	24	622	644	[hg19:12:27465511-27465533:+]	0.7851	144	7	-20.57	-0.1275
MIMAT0003261	hsa-miR-593*	2643	GCH1	uc001xbi.1	NM_000161	cgACUCGUUACGGAC-CGACC-ACGGa	| ||: :||: || |:||| ||||	auUCAGU-GUGUGUGCGUUGGUUGCCg	2	24	6	31	[hg19:14:55310704-55310729:-]	0.4214	124	0	-21.42	-0.5176
MIMAT0003261	hsa-miR-593*	441493	LOC441493	uc004dip.2	BC112980	cgACUCGUUACGGACCGACCACGGa	||:| |:| || :|||||||	auUGGGAAGU-CCAACUUGGUGCCa	2	24	1152	1175	[hg19:X:47694276-47694299:-]	0.5297	157	7	-22.99	-0.2364
MIMAT0003261	hsa-miR-593*	441493	LOC441493	uc004dip.2	BC112980	cgacucguUACGGACCG--ACCACGGa	|| : |||: |||||||	-----aauAUAUGUGGUCAUGGUGCCc	2	18	1	22	[hg19:X:47695429-47695450:-]	0.6139	148	7	-17.19	-0.9253
MIMAT0003261	hsa-miR-593*	8859	STK19	uc011jpa.1	NM_004197	cgacUCGUUACGGAC-CGACCACGGa	||::: || | |||||||	ggaaAGUGGAACCAGAAAUGGUGCCa	2	22	217	242	[hg19:6_ssto_hap7:3281753-3281778:+]	0.6029	144	7	-17.03	-0.6758
MIMAT0003261	hsa-miR-593*	8859	STK19	uc011jpa.1	NM_004197	cgacucguuacggaccgACCACGGa	||||||:	uucccuuucguguaaaaUGGUGCUg	2	9	255	279	[hg19:6_ssto_hap7:3281791-3281815:+]	0.6029	124	0	-12.87	-0.1136
MIMAT0003261	hsa-miR-593*	145282	MIPOL1	uc001wuc.2	NM_138731	cgacucguuacggaccgaCCACGGa	||||||	uaaaagauauuaaauauaGGUGCCa	2	8	531	555	[hg19:14:38016707-38016731:+]	0.5943	120	6	-11.64	-0.5506
MIMAT0003261	hsa-miR-593*	94031	HTRA3	uc003gkz.2	AY280666	cgacUCGUUACGG-ACCGACCACGGa	||:: ||| ||||||||||	ccccAGUGCAGCCAAGGCUGGUGCCa	2	22	61	86	[hg19:4:8297505-8297530:+]	0.5374	164	7	-28.74	-0.1119
MIMAT0003261	hsa-miR-593*	25960	GPR124	uc003xkj.2	NM_032777	cgacUCGUUACGGAC---CG--ACCACGGa	||| | |||| | |||||||	cuaaAGCUAGUCCUGUAAACAAUGGUGCCc	2	22	816	845	[hg19:8:37700689-37700718:+]	0.3971	143	7	-22.18	-0.1102
MIMAT0003261	hsa-miR-593*	57563	KLHL8	uc003hql.1	NM_020803	cgaCUCG-UUACGGACCGACCACGGa	|| | :|||:: ||||||||	uuaGAUCUGAUGUUAUUCUGGUGCCc	2	23	764	789	[hg19:4:88083882-88083907:-]	0.5224	157	7	-21.44	-0.2861
MIMAT0003261	hsa-miR-593*	388697	HRNR	uc001ezt.1	NM_001009931	cgACUCGUUACGGACCGACCACGGa	| | : || : | | |||||||	caUCAUUCAUUUAUAGAUGGUGCCa	2	24	322	346	[hg19:1:152185206-152185230:-]	0.561	151	7	-12.79	-1.0868
MIMAT0003261	hsa-miR-593*	28231	SLCO4A1	uc002ydc.1	CR616855	cgacucGUUACGGACCGAC-CACGGa	||:| :| | ||| |||||	gaguccCAGU-UCAGCCUGAGUGCCu	2	20	1327	1351	[hg19:20:61296395-61296419:+]	0.7585	121	0	-20	-0.187
MIMAT0003261	hsa-miR-593*	794	CALB2	uc010vme.1	NR_027910	cgACUCGUUACGGAC-CGACC-ACGGa	||| |:| || || ||||| ||||	auUGA-CGA-GCAUGAGCUGGAUGCCc	2	24	673	697	[hg19:16:71419495-71419519:+]	0.7891	130	0	-24.99	-0.7606
MIMAT0003261	hsa-miR-593*	285672	SFRS12IP1	uc003jtk.2	NM_173829	cgACUC---GUUACGGACCGACCACGGa	|||| ||| : | |||||||	caUGAGCAACAAAAGUAGAAUGGUGCCa	2	24	4755	4782	[hg19:5:64015429-64015456:-]	0.5741	146	7	-21.13	-0.1081
MIMAT0003261	hsa-miR-593*	11218	DDX20	uc001ebs.2	NM_007204	cgacucguuacggaccgaCCACGGa	||||||	uagagcugaaaguuucagGGUGCCa	2	8	246	270	[hg19:1:112309767-112309791:+]	0.5737	120	6	-18.66	-0.1619
MIMAT0003261	hsa-miR-593*	9819	TSC22D2	uc003exv.2	NM_014779	cgacUCGUUACGGACCGAC-CACGGa	|||||| : | :|| |||||	ugaaAGCAAUCUAUCCUUGUGUGCCa	2	22	31	56	[hg19:3:150176454-150176479:+]	0.5525	129	0	-16.75	-0.7303
MIMAT0003261	hsa-miR-593*	23215	BAT2L2	uc010pmg.1	NM_015172	cgacucguuacggaccgaCCACGGa	||||||	aagcuaauuuuaaaaaacGGUGCCa	2	8	1202	1226	[hg19:1:171562188-171562212:+]	0.6372	120	6	-12.68	-0.1131
MIMAT0003261	hsa-miR-593*	50717	DCAF8	uc010pjb.1	NM_015726	cgACUCGUUACGGACCGACCACGGa	| | | | :: || |||||||	acUUAACUACUUUAGGGUGGUGCCa	2	24	1199	1223	[hg19:1:160186159-160186183:-]	0.5545	151	7	-18.23	-0.17
MIMAT0003261	hsa-miR-593*	302	ANXA2	uc002agm.2	NM_001002858	cgACUCGUUACGGACCGACC-ACGGa	||||| :| | | ||| ||||	acUGAGCUGU-ACAGUAUGGUUGCCc	2	24	398	422	[hg19:15:60639407-60639431:-]	0.5464	121	0	-21.72	-0.7736
MIMAT0003261	hsa-miR-593*	8537	BCAS1	uc002xws.2	NM_003657	cgaCUCGUUACGGACCGACC-ACGGa	|:|| :|| :||| ||| ||||	cccGGGCUGUG-UUGGGUGGUUGCCa	2	23	745	769	[hg19:20:52560692-52560716:-]	0.6187	132	0	-24.24	-0.5313
MIMAT0003261	hsa-miR-593*	23390	ZDHHC17	uc001syj.2	AK299089	cgacUCGUUACGGACCGAC-CACGGa	| |:| | | ||||| |||||	cgauACCGAAG-CGGGCUGUGUGCCc	2	22	217	241	[hg19:12:77158070-77158094:+]	0.6883	127	0	-22.66	-0.3882
MIMAT0003261	hsa-miR-593*	23390	ZDHHC17	uc001syj.2	AK299089	cgACUCGUUACGGAC---CGACCACGga	|| |||| || ||||||	guUGUGCAACUAAUGAAAUAUGGUGCag	3	24	477	504	[hg19:12:77203512-77203539:+]	0.8436	122	0	-18.29	-0.2183
MIMAT0003261	hsa-miR-593*	2932	GSK3B	uc003edn.2	NM_002093	cgacucGUUACGGACCGAC-CACGGa	:||| :|| ||| |||||	ucaguuUAAU-UCUUACUGUGUGCCc	2	20	3530	3554	[hg19:3:119542081-119542105:-]	0.628	121	0	-16.06	-0.267
MIMAT0003261	hsa-miR-593*	440508	CLEC4GP1	uc002mij.2	AK123140	cgacUCGUUACGGAC-CGACCA-CGGa	:|| ||| ||| ||||| |||	uccuGGCCAUGGCUGUCCUGGUCGCCa	2	22	119	145	[hg19:19:7852798-7852824:+]	0.5804	132	0	-26.36	-0.1015
MIMAT0003261	hsa-miR-593*	27250	PDCD4	uc001kzh.2	NM_014456	cgAC-UCGUUACGGACCGACCACGGa	|| ||::| |:| | |||||||	guUGCAGUGA-GUCGAGAUGGUGCCa	2	24	1645	1669	[hg19:10:112659491-112659515:+]	0.5047	156	7	-21.74	-0.3602
MIMAT0003261	hsa-miR-593*	64398	MPP5	uc001xjc.2	NM_022474	cgacucguuacggaccgACCACGGa	|||||||	aaaaauaaaaaacaaaaUGGUGCCa	2	9	515	539	[hg19:14:67800188-67800212:+]	0.5391	140	7	-12.77	-0.9041
MIMAT0003261	hsa-miR-593*	203238	C9orf93	uc003zmc.2	BX537933	cgacucgUUACGGACCGACCACGGa	||| || ||||||||	uuaggaaAAUAACU--CUGGUGCCa	2	19	1068	1090	[hg19:9:15658324-15658346:+]	0.5192	151	7	-18.9	-0.4845
MIMAT0003261	hsa-miR-593*	23315	SLC9A8	uc002xuv.1	NM_015266	cgACUCGUUA-CGGACCGACC-ACGGa	||| ||:| |: | |||| ||||	uaUGAACAGUCGUGUCACUGGAUGCCu	2	24	4247	4273	[hg19:20:48508720-48508746:+]	0.5463	130	0	-21.87	-0.1538
MIMAT0003261	hsa-miR-593*	3988	LIPA	uc009xtq.2	NM_001127605	cgAC-UC-GUUACGGACCGACC-ACGGa	|| || ||| ||| | ||| ||||	ugUGAAGCCAAAGCCCCG-UGGUUGCCc	2	24	868	894	[hg19:10:90973691-90973717:-]	0.5386	123	0	-17.96	-0.3169
MIMAT0003261	hsa-miR-593*	23589	CARHSP1	uc002czi.1	NM_014316	cgaCUCGUUACGGACCGACCACGGa	|: :: ||||| :|||||||	gacGGAUGUUGCCU-UUUGGUGCCu	2	23	581	604	[hg19:16:8948417-8948440:-]	0.4321	156	7	-26.13	-0.1702
MIMAT0003261	hsa-miR-593*	664701	ZNF826	uc010ecm.2	NM_001039884	cgACUCGUUACGG--ACCGACC-ACGGa	||| ||| ||| | :||| ||||	ugUGA-CAAAGCCUUUAUUUGGUUGCCg	2	24	868	894	[hg19:19:20576399-20576425:-]	0.5025	124	0	-20.57	-0.5291
MIMAT0003261	hsa-miR-593*	7593	MZF1	uc010euu.1	AK310381	cgaCUCGUUACGGACCGACCACGGa	|| :|: || | |||||||	acaGACUAGAGCACAG-UGGUGCCa	2	23	1048	1071	[hg19:19:59079565-59079588:-]	0.5135	148	7	-18.71	-0.4331
MIMAT0003261	hsa-miR-593*	339184	CCDC144NL	uc002gyf.2	NM_001004306	cgacucguuacgGACCGACCACGGa	||| ||||||||	ugaauuuuuaaaCUGCCUGGUGCCu	2	14	674	698	[hg19:17:20768030-20768054:-]	0.7136	157	7	-23.12	-0.3833
MIMAT0003261	hsa-miR-593*	11152	WDR45	uc010nim.1	CR608446	cgacUCGUUACGGACCGACCACGGa	| :|||| ||||||||||	aagcAUUAAUG--GGGCUGGUGCCc	2	22	155	177	[hg19:X:48932349-48932371:-]	0.5885	162	7	-27.36	-0.1743
MIMAT0003261	hsa-miR-593*	11152	WDR45	uc010nim.1	CR608446	cgacUCGUUACGGAC--C-GAC-CACGGa	|||| | |:|| | ||| |||||	ccccAGCACUUCUUGAUGACUGUGUGCCc	2	22	223	251	[hg19:X:48932275-48932303:-]	0.5885	127	0	-18.91	-0.2332
MIMAT0003261	hsa-miR-593*	113451	ADC	uc001bwr.2	NM_052998	cgACUCGUUACGGACCGACCACGGa	| :|| | | || ||||||||	ccUUGGCCAGGACU--CUGGUGCCc	2	24	85	107	[hg19:1:33585868-33585890:+]	0.682	156	7	-22.83	-0.1298
MIMAT0003261	hsa-miR-593*	158835	AWAT2	uc004dxt.1	NM_001002254	cgaCUCGUUAC-GGA---CCG----ACCACGGa	||| ::|| ||| ||| |||||||	gggGAGAGGUGCCCUGACGGCACUUUGGUGCCa	2	23	99	131	[hg19:X:69261377-69261409:-]	0.563	147	7	-26.41	-0.5247
MIMAT0003261	hsa-miR-593*	54915	YTHDF1	uc002yeh.2	NM_017798	cgACUC-GUUACGGAC--CGACCACGGa	|||| ::| || || |||||||	uuUGAGUUGAAGCAUGAAAAUGGUGCCc	2	24	1000	1027	[hg19:20:61827033-61827060:-]	0.5748	153	7	-23.56	-0.318
MIMAT0003261	hsa-miR-593*	79776	ZFHX4	uc003yav.2	NM_024721	cgacucguuacggaccGACCACGga	:||||||	aagaccuauuuaacaaUUGGUGCau	3	10	1012	1036	[hg19:8:77777813-77777837:+]	0.7795	121	0	-12.39	-0.1127
MIMAT0003261	hsa-miR-593*	642846	LOC642846	uc010sgp.1	NR_024374	cgacucguuacggaCCGACCACGGa	||:|||||||	aaugaaacacagaaGGUUGGUGCCa	2	12	251	275	[hg19:12:9440808-9440832:+]	0.6455	151	7	-20.28	-0.3951
MIMAT0003261	hsa-miR-593*	5306	PITPNA	uc002fst.3	NM_006224	cgaCUCGUUACGGACCGAC-CACGGa	|:|:|:| |||| || |||||	cagGGGUAGUACCUGAGUGUGUGCCa	2	23	2198	2223	[hg19:17:1421632-1421657:-]	0.596	138	0	-26.1	-0.2056
MIMAT0003261	hsa-miR-593*	22981	NINL	uc010gdo.1	AK309298	cgACUCGUUACGGACCGAC-CACGGa	||:|||: ||| || |||||	ucUGGGCAG---AUGGGUGAGUGCCa	2	24	57	79	[hg19:20:25459419-25459441:-]	0.5452	123	0	-28.83	-0.5915
MIMAT0003261	hsa-miR-593*	80152	CENPT	uc010vke.1	AK297570	cgaCUCGUUACGGACCG--ACC-ACGGa	||||| |||||| ||| ||||	cuaGAGCA--CCCUGGCUGUGGCUGCCu	2	23	865	890	[hg19:16:67864176-67864201:-]	0.5748	130	0	-30.44	-0.108
MIMAT0003261	hsa-miR-593*	3105	HLA-A	uc011ejw.1	AK125608	cgaCUCGUUACGGACC---GAC-CACGGa	|| | | |||||| ||| |||||	gccGACCCA-GCCUGGGCCCUGUGUGCCa	2	23	85	112	[hg19:6_apd_hap1:1152394-1152421:+]	0.5489	127	0	-23.85	-0.1742
MIMAT0003261	hsa-miR-593*	129563	DIS3L2	uc010fxz.2	NM_152383	cgacucGUUACGGACCGACC-ACGGa	|:|| | ||||| ||||	ccaacaCGAUUCAGAGCUGGCUGCCu	2	20	478	503	[hg19:2:233201818-233201843:+]	0.5461	123	0	-20.74	-0.3182
MIMAT0003261	hsa-miR-593*	1390	CREM	uc001iym.2	NM_182717	cgACUCGUUACG-GACCGACCACGGa	|| | ||: || :||||||:	guUGCACUUUGUAGUGUUUGGUGCUc	2	24	976	1001	[hg19:10:35501302-35501327:+]	0.712	134	0	-20.02	-0.1269
MIMAT0003261	hsa-miR-593*	56203	LMOD3	uc003dns.2	NM_198271	cgacucgUUACGGACCGACCACGGa	|| ||| :|||||||	aaaaaaaAAAACCU--UUGGUGCCu	2	19	1631	1653	[hg19:3:69156593-69156615:-]	0.5147	147	7	-20	-0.9156
MIMAT0003261	hsa-miR-593*	284800	FAM182A	uc010gdq.2	NR_026713	cgacucguuacggaccgACCACGGa	|||||||	aaauugucaaauaaacaUGGUGCCu	2	9	5079	5103	[hg19:20:26067521-26067545:+]	0.6516	140	7	-17.23	-0.3611
MIMAT0003261	hsa-miR-593*	79770	TXNDC15	uc003lac.1	NM_024715	cgACUCGUUACGGACCGAC-CACGGa	||||: || ||| || |||||	auUGAGUUAUUACUGUGUGAGUGCCa	2	24	1849	1874	[hg19:5:134237224-134237249:+]	0.5425	135	0	-21.65	-0.7937
MIMAT0003261	hsa-miR-593*	55337	C19orf66	uc002mmu.3	NM_018381	cgACUCGUUACGGACCG-ACCACGGa	| :|:|:|| | | | |||||||	cuUCGGUAGUGGCCGCCGUGGUGCCa	2	24	381	406	[hg19:19:10203359-10203384:+]	0.7404	162	7	-22.29	-0.131
MIMAT0003261	hsa-miR-593*	8027	STAM	uc001ipj.1	NM_003473	cgacUCGUUACGGACCGACCACGga	||| | ::| :||||||	caguAGCUAAAUUU--UUGGUGCaa	3	22	697	719	[hg19:10:17757476-17757498:+]	0.6193	126	0	-14.11	-0.2675
MIMAT0003261	hsa-miR-593*	29	ABR	uc002fsd.2	NM_021962	cgACUCGUUACGGACCGACC-ACGGa	||:|||||| || | ||| ||||	gcUGGGCAAUGGCU-GAUGGCUGCCa	2	24	2352	2376	[hg19:17:906944-906968:-]	0.6161	145	0	-33.71	-0.1943
MIMAT0003261	hsa-miR-593*	54919	HEATR2	uc010krz.1	NM_017802	cgACUCGU-UACGGACCGA-CCACGGa	||: :: || |||| :| ||||||	auUGGCUGCAU-CCUGCUUAGGUGCCc	2	24	327	352	[hg19:7:825617-825642:+]	0.5013	124	6	-23.67	-0.3809
MIMAT0003261	hsa-miR-593*	84617	TUBB6	uc010dld.2	AK311364	cgACUCGUU--ACGG--AC-CG-ACCACGGa	|| |||| || | || | |||||||	ccUGCGCAAGCUGGCGGUGAACAUGGUGCCc	2	24	1249	1279	[hg19:18:12325535-12325565:+]	0.8047	147	7	-28.85	-0.3389
MIMAT0003261	hsa-miR-593*	9256	BZRAP1	uc002ivv.2	BX648763	cgacucGUUACGGACCGACCACGGa	:||| : | ||||||||	auaucaUAAU-UAUUACUGGUGCCa	2	20	826	849	[hg19:17:56381309-56381332:-]	0.5934	149	7	-16.39	-0.5564
MIMAT0003261	hsa-miR-593*	8292	COLQ	uc003cae.1	BC144004	cgacUCGUUACGGACCGAC-CACGGa	||| ||:| ||| |||||	gcauAGCCUUGUCCUCCUGUGUGCCu	2	22	1026	1051	[hg19:3:15492100-15492125:-]	0.5069	125	0	-23.14	-0.2119
MIMAT0003261	hsa-miR-593*	285489	DOK7	uc003ghg.1	AK075037	cgaCUCGUUACGGACCGACCACGGa	||||| |::|| |||||||	uggGAGCAUGGUUUG--UGGUGCCu	2	23	327	349	[hg19:4:3502879-3502901:+]	0.4935	163	7	-27.86	-0.1344
MIMAT0003261	hsa-miR-593*	23324	MAN2B2	uc003gjf.1	NM_015274	cgaCUC-GUUACG-G-ACCGACC-ACGGa	||| ||| || | | | ||| ||||	ucaGAGACAAAGCACAUUGGUGGUUGCCa	2	23	951	979	[hg19:4:6623963-6623991:+]	0.5576	123	0	-20.84	-0.2706
MIMAT0003261	hsa-miR-593*	10645	CAMKK2	uc001tzz.1	AL834322	cgacucguuacggaccgACCACGGa	|||||||	auaaacagacagcaaaaUGGUGCC-	2	9	2751	2774	[hg19:12:121675497-121675520:-]	0.7152	140	7	-15.77	-0.6474
MIMAT0003261	hsa-miR-593*	309	ANXA6	uc003ltl.1	NM_001155	cgaCUCGUUAC--GGACC---GACC-ACGGa	|||:| || || || :||| ||||	cuaGAGUACUGGACCAGGAAUUUGGAUGCCu	2	23	492	522	[hg19:5:150480487-150480517:-]	0.544	120	0	-22.45	-0.3034
MIMAT0003261	hsa-miR-593*	221262	CCDC162	uc010kdm.1	BC107114	cgACUCGUUACGGAC----CGACC-ACGGa	|||||: | ||| | ||| ||||	acUGAGCGCAGACUGCAAAGAUGGUUGCCa	2	24	606	635	[hg19:6:109629314-109629343:+]	0.5446	122	0	-25.31	-0.583
MIMAT0003261	hsa-miR-593*	9520	NPEPPS	uc002ilr.3	NM_006310	cgacuCGUUACGGACCGAC-CACGGa	|:|| ||||| || |||||	agacuGUAA-GCCUG--UGUGUGCCa	2	21	1054	1076	[hg19:17:45700340-45700362:+]	0.5407	123	0	-21.24	-0.6709
MIMAT0003261	hsa-miR-593*	3098	HK1	uc009xqc.1	U38228	cgacUC-GUUACGGACCGACCACGGa	|| || |:| | || ||||	caacAGCCACAGUCAAGAUGUUGCCa	2	22	58	83	[hg19:10:71103689-71103714:+]	0.8253	120	0	-9.83	-0.1157
MIMAT0003261	hsa-miR-593*	56112	PCDHGA3	uc003ljm.1	NM_018916	cgacucGUUACGGACC-GACCACGGa	||| || ||| :|||||||	uuccccCAAAGCAUGGUUUGGUGCCa	2	20	498	523	[hg19:5:140891238-140891263:+]	0.6	166	7	-21.9	-0.4899
MIMAT0003261	hsa-miR-593*	79029	SPATA5L1	uc001zvf.2	NR_027635	cgACUCGUUA--CGGACCGACCACGGa	||| ||:| ||: |:|||||||	aaUGA-CAGUUGGCUAUGUUGGUGCCg	2	24	1303	1328	[hg19:15:45697622-45697647:+]	0.6781	160	7	-23.85	-0.1561
MIMAT0003261	hsa-miR-593*	57620	STIM2	uc003gsg.3	NM_020860	cgacucguuacggaccgACCACGga	||||||	uaacaaauauaaauuuaUGGUGCau	3	9	1162	1186	[hg19:4:27025780-27025804:+]	0.6097	120	0	-10.24	-0.2304
MIMAT0003261	hsa-miR-593*	54936	ADPRHL2	uc001bzt.2	NM_017825	cgACUCGUUACGGACCG---ACC-ACGGa	| :|: | |||||| ||| ||||	ucUAGGUCACACCUGGCUCUUGGCUGCCa	2	24	460	488	[hg19:1:36559447-36559475:+]	0.5792	122	0	-23.36	-0.3991
MIMAT0003261	hsa-miR-593*	11253	MAN1B1	uc010ncc.2	AK315797	cgACUCG--UU--ACG-GACCGACC-ACGGa	||| | || ||| | | |||| ||||	gaUGACCCAAACCUGCUCAGCCUGGAUGCCu	2	24	2030	2060	[hg19:9:140002963-140002993:+]	0.7632	120	0	-22.2	-0.2262
MIMAT0003261	hsa-miR-593*	6840	SVIL	uc001iut.1	NM_021738	cgacucGUUACGGAC-CGACCACGGa	||| ::|| :|||||:|	cacuuuCAAGAUUUGUUUUGGUGUCa	2	20	441	466	[hg19:10:29746710-29746735:-]	0.6441	134	0	-17.16	-0.1553
MIMAT0003261	hsa-miR-593*	9577	BRE	uc002rls.2	NM_004899	cgacucguuacggaccgACCACGga	||||||	aauaaacucacaaauuaUGGUGCag	3	9	326	350	[hg19:2:28561628-28561652:+]	0.631	120	0	-11.08	-0.1306
MIMAT0003261	hsa-miR-593*	56940	DUSP22	uc003msx.2	NM_020185	cgacucGUUACGGACCG-ACC-ACGGa	| :| ||| || ||| ||||	agguuuCUGUACCUCGCUUGGAUGCCu	2	20	211	237	[hg19:6:351079-351105:+]	0.5233	122	0	-19.99	-0.1613
MIMAT0003261	hsa-miR-593*	140885	SIRPA	uc002wfr.2	NM_080792	cgacUCGUUACGGACCGACCACGGa	|| ||||::| :|||||||	uaaaAG-AAUGUUUUCUUGGUGCCa	2	22	2015	2038	[hg19:20:1920229-1920252:+]	0.6428	163	7	-21.19	-1.2411
MIMAT0003261	hsa-miR-593*	79083	MLPH	uc002vwt.2	NM_024101	cgACUCGUUACGGACCGACC-ACGGa	| | ::||| || |||| ||||	guUUACUGAUGACU-CCUGGCUGCCc	2	24	191	215	[hg19:2:238462426-238462450:+]	0.5119	125	0	-23.26	-0.1143
MIMAT0003261	hsa-miR-593*	100128398	LOC100128398	uc002qqy.1	AK000879	cgacucguuacggaccgACCACGGa	|||||||	caucaaaugggacgacaUGGUGCCa	2	9	1801	1825	[hg19:19:58517645-58517669:+]	0.5147	140	7	-16.27	-0.2557
MIMAT0003261	hsa-miR-593*	692099	FAM86D	uc003dpp.3	NR_024241	cgacucguuacggaccGACCACGGa	:|||||||	ucccacuuucccacacUUGGUGCCc	2	10	1153	1177	[hg19:3:75470935-75470959:-]	0.4956	141	7	-15.23	-0.1037
MIMAT0003261	hsa-miR-593*	29970	SCHIP1	uc003fcs.1	NM_014575	cgacucGUUACGGACCGACCACGGa	:||| ::| || |||||	uuauuuUAAUUUUUUACUUGUGCCa	2	20	156	180	[hg19:3:159614719-159614743:+]	0.7696	127	0	-10.51	-0.2105
MIMAT0003261	hsa-miR-593*	5354	PLP1	uc010now.1	AK309239	cgaCUCGUUACGGACC-----G-ACCACGGa	||| || |:| || | |||||||	aacGAG-AAGGUCAGGAAGAACGUGGUGCCc	2	23	108	137	[hg19:X:103041793-103041822:+]	0.7149	142	7	-21.19	-0.4802
MIMAT0003261	hsa-miR-593*	3164	NR4A1	uc009zmb.1	AK314437	cgACUC-GUUACGGAC-CGACCACGGa	|| | : :| || | | |||||||	ugUGUGUUUGUCCCAGCGAUGGUGCCu	2	24	330	356	[hg19:12:52449420-52449446:+]	0.6703	149	7	-19.95	-0.3503
MIMAT0003261	hsa-miR-593*	55111	PLEKHJ1	uc002lvf.1	NM_018049	cgacucguuaCGGACC---GACCACGGa	|||||| ||||||||	caccuaacugGCCUGGCACCUGGUGCCa	2	16	379	406	[hg19:19:2233433-2233460:-]	0.5046	158	7	-28.63	-0.1067
MIMAT0003261	hsa-miR-593*	55111	PLEKHJ1	uc002lvf.1	NM_018049	cgacUCGUUACGGACCGACCACGGa	|| |:||| | |||||||	ggcuAG-AGUGC--AG-UGGUGCCa	2	22	131	151	[hg19:19:2233688-2233708:-]	0.5117	142	7	-22.04	-0.1541
MIMAT0003261	hsa-miR-593*	3679	ITGA7	uc001shf.2	AF034833	cgACUCGUUACGGACCG---ACC-ACGGa	|| | | ||||||| ||| ||||	caUGUCCCA-GCCUGGCCUGUGGCUGCCc	2	24	176	203	[hg19:12:56078809-56078836:-]	0.6057	124	0	-23.78	-0.3406
MIMAT0003261	hsa-miR-593*	1909	EDNRA	uc003iky.2	NM_001957	cgacuCGUUACGGACCGACCACGGa	| ||||:| :|||||||	uauuuGAAAUGUC-AUUUGGUGCCa	2	21	475	498	[hg19:4:148464245-148464268:+]	0.5075	154	7	-21.61	-0.7986
MIMAT0003261	hsa-miR-593*	140733	MACROD2	uc002wos.2	BC128036	cgacucguuACGGACCGAC-CACGGa	| ||| |||| |||||	uucacuuuuUCCCU-GCUGAGUGCCc	2	17	153	177	[hg19:20:13976298-13976322:+]	0.6217	122	0	-19.57	-0.2249
MIMAT0003261	hsa-miR-593*	63916	ELMO2	uc002xru.1	NM_182764	cgacUCGUUACGGACCGACCACGGa	| || | | ||||||||	gagaAACACUUACAUUCUGGUGCCu	2	22	50	74	[hg19:20:44995925-44995949:-]	0.6424	149	7	-20.17	-0.6352
MIMAT0003261	hsa-miR-593*	63916	ELMO2	uc002xru.1	NM_182764	cgacucguuaCGGACCG-ACCACGGa	||:| : |||||||	gcucacuccaGCUUCAUAUGGUGCCa	2	16	503	528	[hg19:20:44995471-44995496:-]	0.6182	142	7	-16.64	-0.6809
MIMAT0003261	hsa-miR-593*	4860	PNP	uc001vxo.3	NM_000270	cgacUCGUUACGGACCGACCACGGa	| ||: ||| ||||||||	uucuACCAGACCCU-UCUGGUGCCa	2	22	143	166	[hg19:14:20944903-20944926:+]	0.5335	155	7	-20.65	-0.3987
MIMAT0003261	hsa-miR-593*	56114	PCDHGA1	uc003lji.1	NM_018912	cgacucGUUACGGACC-GACCACGGa	||| || ||| :|||||||	uuccccCAAAGCAUGGUUUGGUGCCa	2	20	498	523	[hg19:5:140891238-140891263:+]	0.6	166	7	-21.9	-0.4899
MIMAT0003261	hsa-miR-593*	5087	PBX1	uc001gct.2	NM_002585	cgACUCGUUACGGACCGACCACGGa	||: ||| :| :|||||||	ggUGGUCAAAUAUU--UUGGUGCCu	2	24	1646	1668	[hg19:1:164817559-164817581:+]	0.5547	148	7	-19.39	-0.1225
MIMAT0003261	hsa-miR-593*	51307	FAM53C	uc003lcv.2	NM_001135647	cgacUCGUUA-CGGACCGACCACGGa	:|| || ::| ||||||||	uucaGGCCAUAAUUUCCCUGGUGCCa	2	22	1881	1906	[hg19:5:137684529-137684554:+]	0.667	152	7	-18.56	-0.4384
MIMAT0003261	hsa-miR-593*	2978	GUCA1A	uc011duo.1	AK125780	cgacUCGUUACGGACCGAC-CACGGa	|| |:| | || ||| |||||	uacaAGAAGUUCAUGACUGAGUGCCc	2	22	1080	1105	[hg19:6:42141415-42141440:+]	0.797	133	0	-16.24	-0.3235
MIMAT0003261	hsa-miR-593*	10730	YME1L1	uc001itj.2	NM_014263	cgaCUCGUUACGG---ACCG-ACCACGGa	|| :| ||| |||| |||||||	cagGAAUAUAGCCUUUUGGCAUGGUGCCa	2	23	467	495	[hg19:10:27400411-27400439:-]	0.5172	156	7	-24.19	-0.2653
MIMAT0003261	hsa-miR-593*	157855	KCNU1	uc003xjw.2	BC028701	cgacucGUUACGGACCGACCACGGa	||| | ||| :|||||||	aucgccCAA-GGCUGUUUGGUGCCa	2	20	1534	1557	[hg19:8:36694392-36694415:+]	0.7453	161	7	-21.98	-0.4429
MIMAT0003261	hsa-miR-593*	51077	FCF1	uc001xqi.2	BC080600	cgACUCGUUACG----GACCGACCACGGa	||||: ||: | | |||||||	uuUGAGUUCUGUUGUACAGUGUGGUGCCu	2	24	1429	1457	[hg19:14:75203185-75203213:+]	0.5083	146	7	-24.07	-0.4887
MIMAT0003261	hsa-miR-593*	54434	SSH1	uc001tnm.2	NM_018984	cgACUCGUUACGGACCGACCACGGa	||:| ||| | |:|||||||	ggUGGGAAAU---U-GUUGGUGCCa	2	24	3923	3943	[hg19:12:109177821-109177841:-]	0.532	153	7	-20.36	-0.131
MIMAT0003261	hsa-miR-593*	10345	TRDN	uc010ken.2	BC139910	cgacucguuacggaCCGACCACGGa	||||||||||	uuagucucugaagaGGCUGGUGCCa	2	12	304	328	[hg19:6:123785700-123785724:-]	0.5576	155	7	-24.73	-0.2968
MIMAT0003261	hsa-miR-593*	53947	A4GALT	uc003bdb.2	NM_017436	cgaCUCGUUACGGACCG---ACCACGGa	||| | | ||| | |||||||	cucGAGGCAGGGCUGACACAUGGUGCCa	2	23	186	213	[hg19:22:43088683-43088710:-]	0.4352	153	7	-22.6	-0.1745
MIMAT0003261	hsa-miR-593*	79850	FAM57A	uc002frp.2	NM_024792	cgacUCGUUACGGACCGACCACGGa	||||: | :| ||||||||	ugcaAGCAG-GAUUUUCUGGUGCCa	2	22	1104	1127	[hg19:17:645914-645937:+]	0.6109	159	7	-22.97	-0.701
MIMAT0003261	hsa-miR-593*	5511	PPP1R8	uc001bov.1	NM_014110	cgacucguUACGGACCGACCACGGa	|| : || ||||||||	uuuccuucAUCUGUGACUGGUGCCa	2	18	590	614	[hg19:1:28177547-28177571:+]	0.6091	157	7	-20.87	-0.6703
MIMAT0003261	hsa-miR-593*	4776	NFATC4	uc010tok.1	NM_001136022	cgacucGUUACGGACCGACC-ACGGa	::||||||| ||| ||||	uguucuUGAUGCCUG--UGGCUGCCu	2	20	74	97	[hg19:14:24846223-24846246:+]	0.5597	128	0	-22.9	-0.1649
MIMAT0003261	hsa-miR-593*	126536	LOC126536	uc002ncb.1	AK128240	cgaCUCGUUACGGACCGAC-CACGGa	|| ||| | : |||| |||||	---GA-CAAAGAUGAGCUGCGUGCCc	2	23	1	22	[hg19:19:16133438-16133459:+]	0.6042	124	0	-19.54	-0.3253
MIMAT0003261	hsa-miR-593*	57698	KIAA1598	uc009xyw.2	NM_001127211	cgACUCGUUACGGACCGACCA-CGGa	||:| :||||: ||||| |||	cgUGGG-GAUGCU---CUGGUAGCCu	2	24	643	664	[hg19:10:118645191-118645212:-]	0.5602	121	0	-23.58	-0.1927
MIMAT0003261	hsa-miR-593*	3109	HLA-DMB	uc011esj.1	AK295872	cgacucguuacggaccGACCACGGa	||||||||	uuagauuucaacuauuCUGGUGCCa	2	10	379	403	[hg19:6_apd_hap1:4191501-4191525:-]	0.5908	145	7	-16.33	-0.817
MIMAT0003261	hsa-miR-593*	29929	ALG6	uc001daz.2	CR602025	cgacucGUUACGGACCGACC-ACGGa	|: | :|| ||||| ||||	uuccuuCGUUCUCU-GCUGGCUGCCa	2	20	933	957	[hg19:1:63877636-63877660:+]	0.7145	121	0	-18.65	-0.566
MIMAT0003261	hsa-miR-593*	3105	HLA-A	uc011igz.1	M12758	cgACUCGUUACGGACCGACCACGGa	||:|| :| : ||| |||||||	agUGGGC-GUCUGUGG-UGGUGCCu	2	24	123	145	[hg19:6_qbl_hap6:1204879-1204901:+]	0.6067	159	7	-30.26	-0.1571
MIMAT0003261	hsa-miR-593*	4300	MLLT3	uc003zoe.2	NM_004529	cgacUCGUUACG-GACCGACCACGGa	| ||| |: || :|||||:|	aaaaACCAAAGUACU-UUUGGUGUCa	2	22	1375	1399	[hg19:9:20345042-20345066:-]	0.6395	134	0	-13.66	-0.1002
MIMAT0003261	hsa-miR-593*	9931	HELZ	uc010des.1	AK310217	cgacucGU-UACGGA-CCGAC-CACGGa	|| |||:|| ||| |||||	cuucucCACAUGUCUCCUCUGUGUGCCa	2	20	117	144	[hg19:17:65197032-65197059:-]	0.476	121	0	-18.98	-0.2639
MIMAT0003261	hsa-miR-593*	58157	NGB	uc001xtg.1	NM_021257	cgacucGUUACGGACCGAC-CACGGa	|| |||| |||| |||||	cagauuCACUGCC-CGCUGUGUGCCa	2	20	885	909	[hg19:14:77731970-77731994:-]	0.5135	129	0	-22.1	-0.2039
MIMAT0003261	hsa-miR-593*	10385	BTN2A2	uc011dkf.1	AK304744	cgacucguUACGGACCGAC-CACGGa	||| |||| || |||||	auucuuacAUG-CUGG-UGAGUGCCu	2	18	546	569	[hg19:6:26391044-26391067:+]	0.5565	121	0	-21.3	-0.4339
MIMAT0003261	hsa-miR-593*	115426	UHRF2	uc003zjz.2	BC028397	cgacucgUUACGGACCGACC-ACGGa	|||| | | ||| ||||	uaagguaAAUGAAUUGGUGGAUGCCa	2	19	721	746	[hg19:9:6421139-6421142,6433914-6433935:+]	0.6452	122	0	-19.03	-0.2606
MIMAT0003261	hsa-miR-593*	55144	LRRC8D	uc001dnn.2	NM_018103	cgacucguuACGGACCGACCACGga	|||:| :||||||	aauuuacuuUGCUUAAUUGGUGCaa	3	17	378	402	[hg19:1:90401582-90401606:+]	0.6088	136	0	-18.76	-0.216
MIMAT0003261	hsa-miR-593*	331	XIAP	uc004etx.2	NM_001167	cgaCUCGUUA--CGGACCGACCACGGa	|:|||:| ||| :|||||||	gcaGGGCAGUUAACCUUUUUGGUGCCa	2	23	991	1017	[hg19:X:123042022-123042048:+]	0.7487	161	7	-27.43	-0.3217
MIMAT0003261	hsa-miR-593*	200424	TET3	uc002skb.3	NM_144993	cgacucguuACGGACCGACCACGGa	| ||| :|||||||	uaauuuuccUCCCUAAUUGGUGCCa	2	17	1338	1362	[hg19:2:74330641-74330665:+]	0.63	152	7	-18.27	-0.3631
MIMAT0003261	hsa-miR-593*	4728	NDUFS8	uc010rpz.1	AK302449	cgacuCGUUACGGACCGAC-CACGGa	| |:| |||| :|| |||||	uuuccGGAGU-CCUGCUUGUGUGCCu	2	21	190	214	[hg19:11:67801084-67801108:+]	0.4866	126	0	-23.55	-0.2698
MIMAT0003261	hsa-miR-593*	284361	C19orf63	uc002psk.2	NM_175063	cgacuCGUUACGGACCGAC-CACGGa	||:: |:| |||| |||||	ggccuGCGGGCCUUUGCUGUGUGCCa	2	21	918	943	[hg19:19:50986323-50986348:+]	0.4934	128	0	-25.88	-0.1953
MIMAT0003261	hsa-miR-593*	89848	FCHSD1	uc003llk.2	NM_033449	cgACUCGUUACGGACC-----GACC-ACGGa	| || |:||:|||| :||| ||||	gaUCAGAAGUGUCUGGUUUGCUUGGCUGCCc	2	24	1208	1238	[hg19:5:141019827-141019857:-]	0.7005	126	0	-25.67	-0.4219
MIMAT0003261	hsa-miR-593*	3811	KIR3DL1	uc010yfn.1	U33328	cgacucguuacggaccGACCACGGa	||||||||	uccucacgccacaaauCUGGUGCCu	2	10	130	154	[hg19:19:55341860-55341884:+]	0.5106	145	7	-20.11	-0.2949
MIMAT0003261	hsa-miR-593*	574016	CLLU1OS	uc001tcb.1	NM_001025232	cgACUCGUUACGGACCGACCACGGa	||: : ||| || |||||||	ggUGGUUUAUGAAUG--UGGUGCCa	2	24	75	97	[hg19:12:92814151-92814173:-]	0.5775	152	7	-18.3	-0.5131
MIMAT0003261	hsa-miR-593*	127795	C1orf87	uc001czs.1	NM_152377	cgACUCGUUACGGACCGAC-CACGGa	||||: | || ||| |||||	acUGAGU--UUCCAAUCUGUGUGCCa	2	24	903	926	[hg19:1:60455419-60455442:-]	0.5736	120	0	-23.25	-0.8228
MIMAT0003261	hsa-miR-593*	477	ATP1A2	uc001fvc.2	NM_000702	cgacUCGUUACGGACCG-AC-CACGGa	|| |||||| | || |||||	uuccAGAAAUGCCACACUUGUGUGCCa	2	22	792	818	[hg19:1:160111904-160111930:+]	0.5059	128	0	-18.91	-0.1485
MIMAT0003261	hsa-miR-593*	387111	NCRNA00222	uc003pso.1	AY927449	cgacucgUUACGGACCGACCACGGa	||| ||| |||||||	aaccccgAAU-CCU---UGGUGCCu	2	19	259	279	[hg19:6:109080683-109080703:+]	0.5156	144	7	-18.06	-0.1359
MIMAT0003261	hsa-miR-593*	2280	FKBP1A	uc002wey.2	NM_000801	cgacuCGUUACGGACC--GACCACGGa	|| ||| || ||||||||	gaucuGCCAUGGAGGGAUCUGGUGCCu	2	21	36	62	[hg19:20:1350691-1350716,1352720-1352720:-]	0.6324	155	7	-25.29	-0.2044
MIMAT0003261	hsa-miR-593*	119016	AGAP4	uc001jcx.3	NM_133446	cgACUCGUUACGGACCGACCACGga	||| :: |:|| :||||||	uuUGACUGCAGUCUCCUUGGUGCaa	3	24	12	36	[hg19:10:46321327-46321351:-]	0.5113	139	0	-19.62	-0.1186
MIMAT0003261	hsa-miR-593*	7153	TOP2A	uc002huq.2	NM_001067	cgACUCGUUACGGACCGACC-ACGGa	||| | :| || |||| ||||	cuUGACCUGU-CCCCUCUGGCUGCCu	2	24	663	687	[hg19:17:38545084-38545108:-]	0.5384	121	0	-19.25	-0.2269
MIMAT0003261	hsa-miR-593*	149461	CLDN19	uc001cht.1	NM_148960	cgAC-UCGUUACGGA-CCGA-CCACGGa	|| || |:| :|| || ||||||	acUGCAGGAGUUUCUCCUCUGGGUGCCu	2	24	1438	1465	[hg19:1:43199292-43199319:-]	0.5068	121	6	-25.39	-0.148
MIMAT0003261	hsa-miR-593*	23710	GABARAPL1	uc001qxu.2	CR620458	cgacuCGUUACGGACCGACCACGGa	|| | :|| :|||||||	aaccuGCUCUUUCUCUUUGGUGCCc	2	21	1166	1190	[hg19:12:10375175-10375199:+]	0.5795	152	7	-18.76	-0.4823
[truncated: 2,415 more rows]

## Sheet: miRDB
Target Rank	Target Score	miRNA Name	Gene Symbol	Gene Description
1	95	hsa-miR-593-5p	DPP8	dipeptidyl-peptidase 8
[truncated: 198 more rows]
